# Supplementary material for: Metabolic and Transcriptional Changes across Osteogenic Differentiation of Mesenchymal Stromal Cells
Source: MDPI journal article supplement (doi:10.3390/bioengineering8120208), 2021-12-10
Supplement: s1 [file s1]

## **Supplemental information.**

**TITLE:** Using metabolomics and gene regulatory networks to define metabolic stages during osteogenic differentiation of mesenchymal stromal cells

**AUTHOR LIST:** Thora Bjorg Sigmarsdottir<sup>1</sup>, Sarah McGarrity<sup>1,2</sup>, Snaevar Sigurdsson<sup>5</sup>, Adrian López García de Lomana<sup>2</sup>, James Yurkovich<sup>3</sup>, Ottar Rolfsson<sup>2</sup>, Olafur Eysteinn Sigurjonsson<sup>\*,1,4</sup>

### **AUTHOR AFFILIATIONS:**

<sup>1</sup>School of Science and Engineering, Reykjavik University, Reykjavik, Iceland

<sup>2</sup>Center for Systems Biology, University of Iceland, Reykjavik, Iceland

<sup>3</sup>Department of Bioengineering, University of California San Diego, La Jolla, CA, USA

<sup>4</sup>The Blood Bank, Landspítali – the National University Hospital of Iceland, Reykjavik, Iceland

<sup>5</sup>Biomedical Center, University of Iceland, Reykjavik, Iceland

### **CORRESPONDING AUTHOR CONTACT INFORMATION:**

Dr. Olafur E. Sigurjonsson, M.Sc., Ph.D., Principal Investigator

School of Science and Engineering, Reykjavik University

Menntavegur 1

102 Reykjavik, Iceland

email: oes@ru.is

Tel: +354-543-5523; Mobile: +354-694-9427; Fax: +354-543-5532

## SUPPLEMENTAL TABLES

**Table S1.** Primer pairs used in RT-qPCR. Forward and reverse primers used for RT-qPCR analysis of SPP1, RUNX2 and COL1A2 with TBP as a referencing gene.

| Gene          | Forward Primer              | Reverse Primer           |
|---------------|-----------------------------|--------------------------|
| <b>RUNX2</b>  | 5'-CTTCACAAATCCTCCTCCCAAGT  | 5'-AGGCGGTCAGAGAACAAAC   |
| <b>SPP1</b>   | 5'-CCCCACAGTAGACACATATGATG  | 5'-TTCCAACCTCTCGCTTTCCAT |
| <b>COL1A2</b> | 5'-CCTTCAATCCATCCAGACCAT    | 5'-GTGAGAGAGGAGTTGTTGGAC |
| <b>TBP</b>    | 5'-CAGTGAATCTTGGTTGTAACTTGA | 5'-TCGTGGCTCTCTTATCCTCAT |

**Table S2.** Akaike Information Criteria from models fitted with the gamm4 function in R, all models are for each metabolite varying by day with the combinations of random effects considered below.

|                  | Donor + Analysis Batch | PIPL/Donor + Analysis Batch | Passage/Donor + Analysis Batch | PIPL/Passage/Donor + Analysis Batch | Donor + Media + Analysis Batch | Donor    |
|------------------|------------------------|-----------------------------|--------------------------------|-------------------------------------|--------------------------------|----------|
| <b>Glucose</b>   | 1543.795               | 1545.795                    | 1545.795                       | 1547.795                            | 1545.795                       | 1558.992 |
| <b>Lactate</b>   | 1168.993               | 1170.993                    | 1170.993                       | 1172.993                            | 1167.776                       | 1227.897 |
| <b>Glutamine</b> | 587.1644               | 589.1644                    | 588.3329                       | 591.1644                            | 595.5849                       | 591.5849 |
| <b>Glutamate</b> | 292.9485               | 294.9485                    | 293.2039                       | 296.9485                            | 381.4727                       | 377.9853 |
| <b>Ammonia</b>   | 757.6984               | 759.3254                    | 758.5992                       | 761.3254                            | 820.5771                       | 816.5771 |

**Table S3.** ALP activities for 4 different donors during 28 days of osteogenic differentiation. SEM is the standard error of the mean. Related to Figure S1A.

| Donor             | ALP Activity (nmol/min) |                    |                    |                    |
|-------------------|-------------------------|--------------------|--------------------|--------------------|
|                   | Day 0                   | Day 7              | Day 14             | Day 28             |
| D12               | 0.98                    | 2.08               | 3.61               | 1.44               |
| D13               | 2.80                    | 4.40               | 4.89               | 3.35               |
| D14               | 0.70                    | 3.21               | 3.77               | 1.95               |
| D15               | 1.92                    | 4.49               | 4.93               | 5.20               |
| <b>Mean (SEM)</b> | <b>1.60 (0.48)</b>      | <b>3.55 (0.57)</b> | <b>4.30 (0.35)</b> | <b>2.98 (0.84)</b> |

**Table S4.** Alizarin Red S staining measurement results (both optical density and percentage increase in relation to Day 0), validating mineralization, for 4 different donors during 28 days of osteogenic differentiation. SEM is the standard error of the mean. Related to Figure S1B.

| Donor             | Optical Density after Alizarin Red Staining (-) |                      |                      | % increase in mineralization |                        |
|-------------------|-------------------------------------------------|----------------------|----------------------|------------------------------|------------------------|
|                   | Day 0                                           | Day 14               | Day 28               | Day 14                       | Day 28                 |
| D12               | 0.099                                           | 0.141                | 0.148                | 42.4                         | 49.40                  |
| D13               | 0.103                                           | 0.155                | 1.720                | 50.4                         | 1570                   |
| D14               | 0.127                                           | 0.685                | 4.000                | 439                          | 3049                   |
| D15               | 1.956                                           | 0.908                | 5.203                | -46.4                        | 166                    |
| <b>Mean (SEM)</b> | <b>0.571 (0.462)</b>                            | <b>0.472 (0.193)</b> | <b>2.768 (1.133)</b> | <b>121.35 (108.13)</b>       | <b>1208.6 (704.06)</b> |

**Table S5.** Real-time qPCR results showing gene expression levels of RUNX2 and COL1A2. For each transcription factor, a relative expression level (compared to the housekeeping gene, TBP) is shown for Day 0 (the beginning of osteogenic differentiation) and Day 28 (the end of the differentiation). The calculated fold change between Days 0 and 28 is also shown. SEM is the standard error of the mean.

| Donor        | RUNX2                        |                              |                              | COL1A2                           |                                |                              |
|--------------|------------------------------|------------------------------|------------------------------|----------------------------------|--------------------------------|------------------------------|
|              | Relative Expression          |                              | Fold change                  | Relative Expression              |                                | Fold change                  |
|              | Day 0 <sup>b</sup>           | Day 28                       |                              | Day 0 <sup>b</sup>               | Day 28                         |                              |
| D13          | 2.43                         | 2.68                         | 1.10                         | 0.03                             | 17.35                          | 0.08                         |
| D14          | 0.88                         | 1.95                         | 2.22                         | 207.70                           | 28.13                          | 0.07                         |
| D15          | 1.28                         | 3.69                         | 2.89                         | 379.06                           | 152.20                         | 0.64                         |
| <b>Mean</b>  |                              |                              |                              |                                  |                                |                              |
| <b>(SEM)</b> | <b>1.53</b><br><b>(0.47)</b> | <b>2.77</b><br><b>(0.50)</b> | <b>2.07</b><br><b>(0.52)</b> | <b>195.60</b><br><b>(109.59)</b> | <b>65.89</b><br><b>(43.27)</b> | <b>0.26</b><br><b>(0.19)</b> |

<sup>b</sup> Measurements of the transcription factors used to determine relative expression levels for day 0 were obtained from a parallel study done over the same time period, in the same environment, and using the same material and cells from the same donors.

## Supplemental Figures

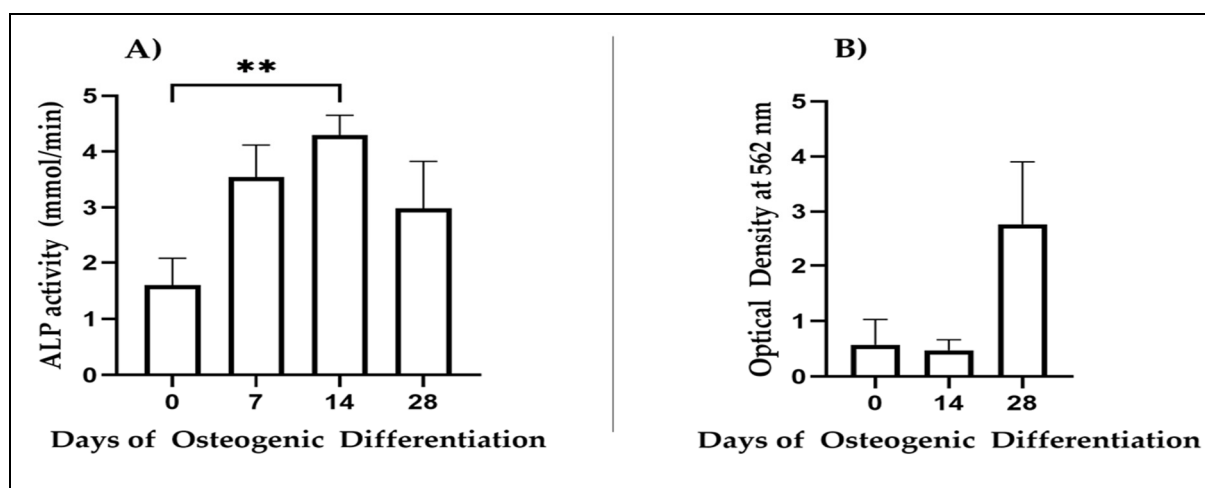

**Figure S1. Indicators of osteogenic differentiation.** (A) Alkaline phosphatase (ALP) activity for Days 0, 7, 14 and, 28. ALP is shown as nmol/min of p-nitrophenyl phosphate converted into p-nitrophenol. (B) Alizarin Red quantification for Days 0, 14, and 28. Mean and standard error of the mean (SEM) are shown ( $n = 4$ ).

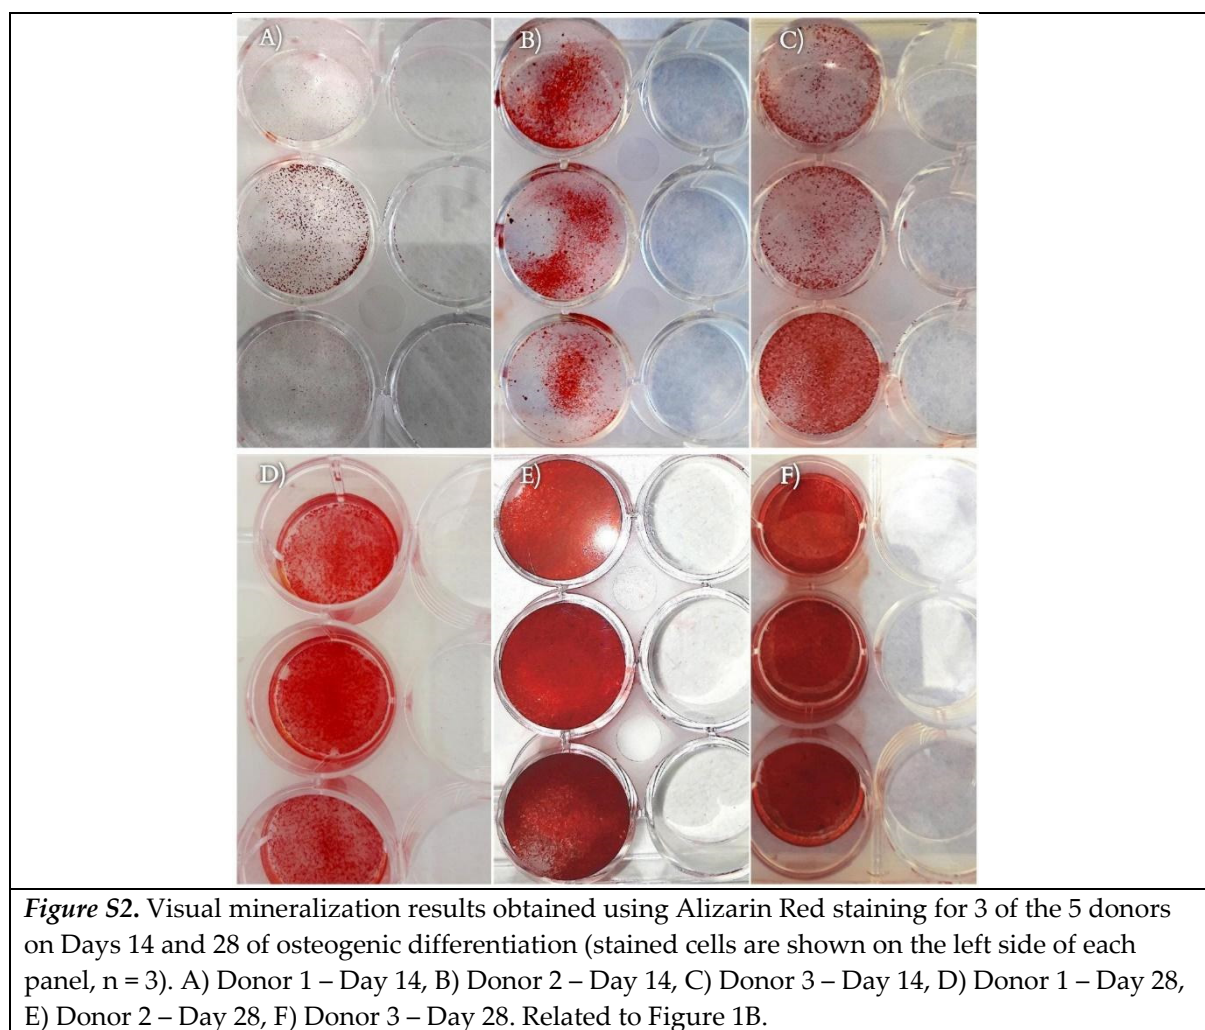

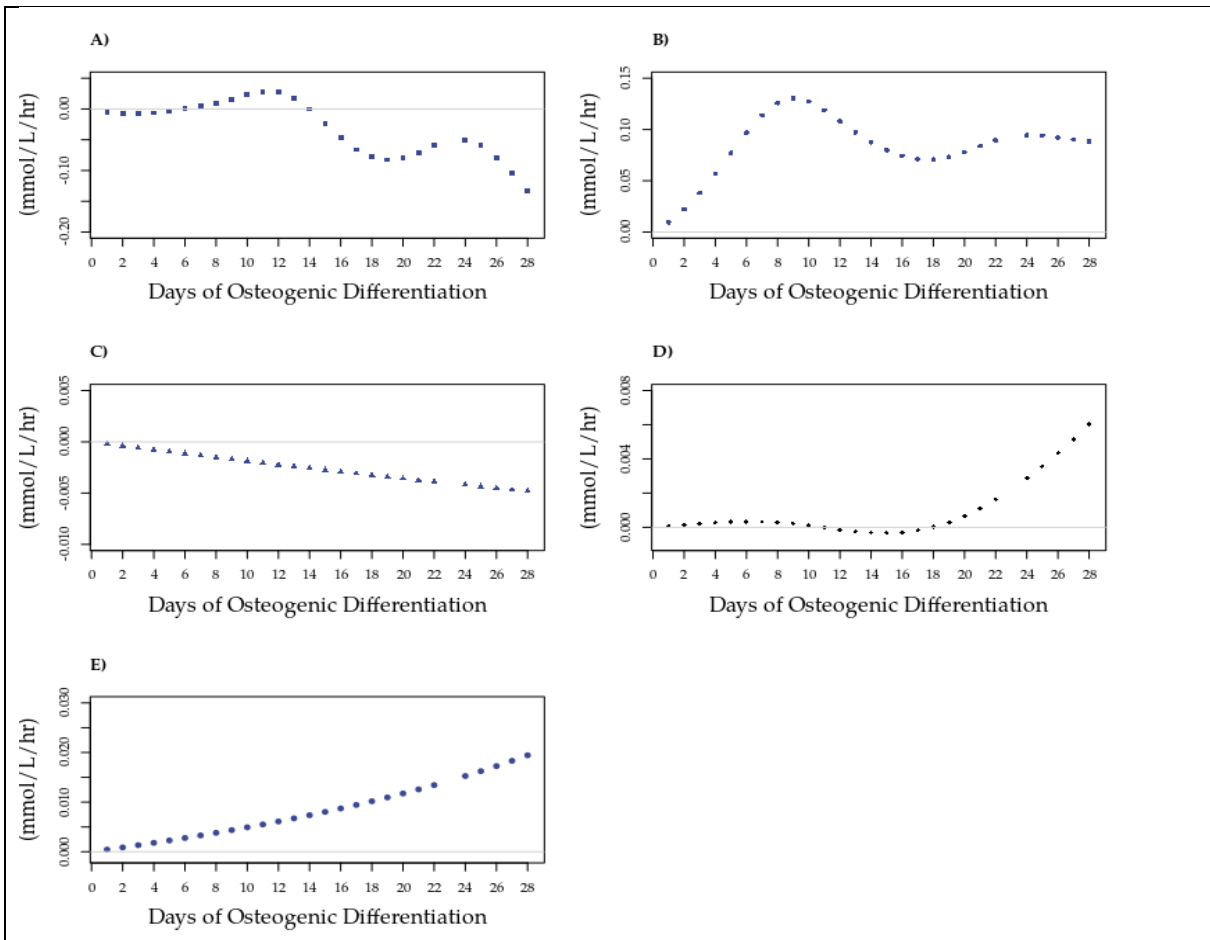

**Figure S3.** Rate of concentration change (mmol/l/hr) in spent medium for extracellular (A) glucose ( $n = 4$ ), (B) lactate ( $n = 4$ ), (C) glutamine ( $n = 4$ ), (D) ammonia ( $n = 4$ ), and (E) glutamate ( $n = 4$ ) for Days 1 to 28 of osteogenic differentiation. Dots (various shapes) represent the model predicted value subsequently used in change point analysis.

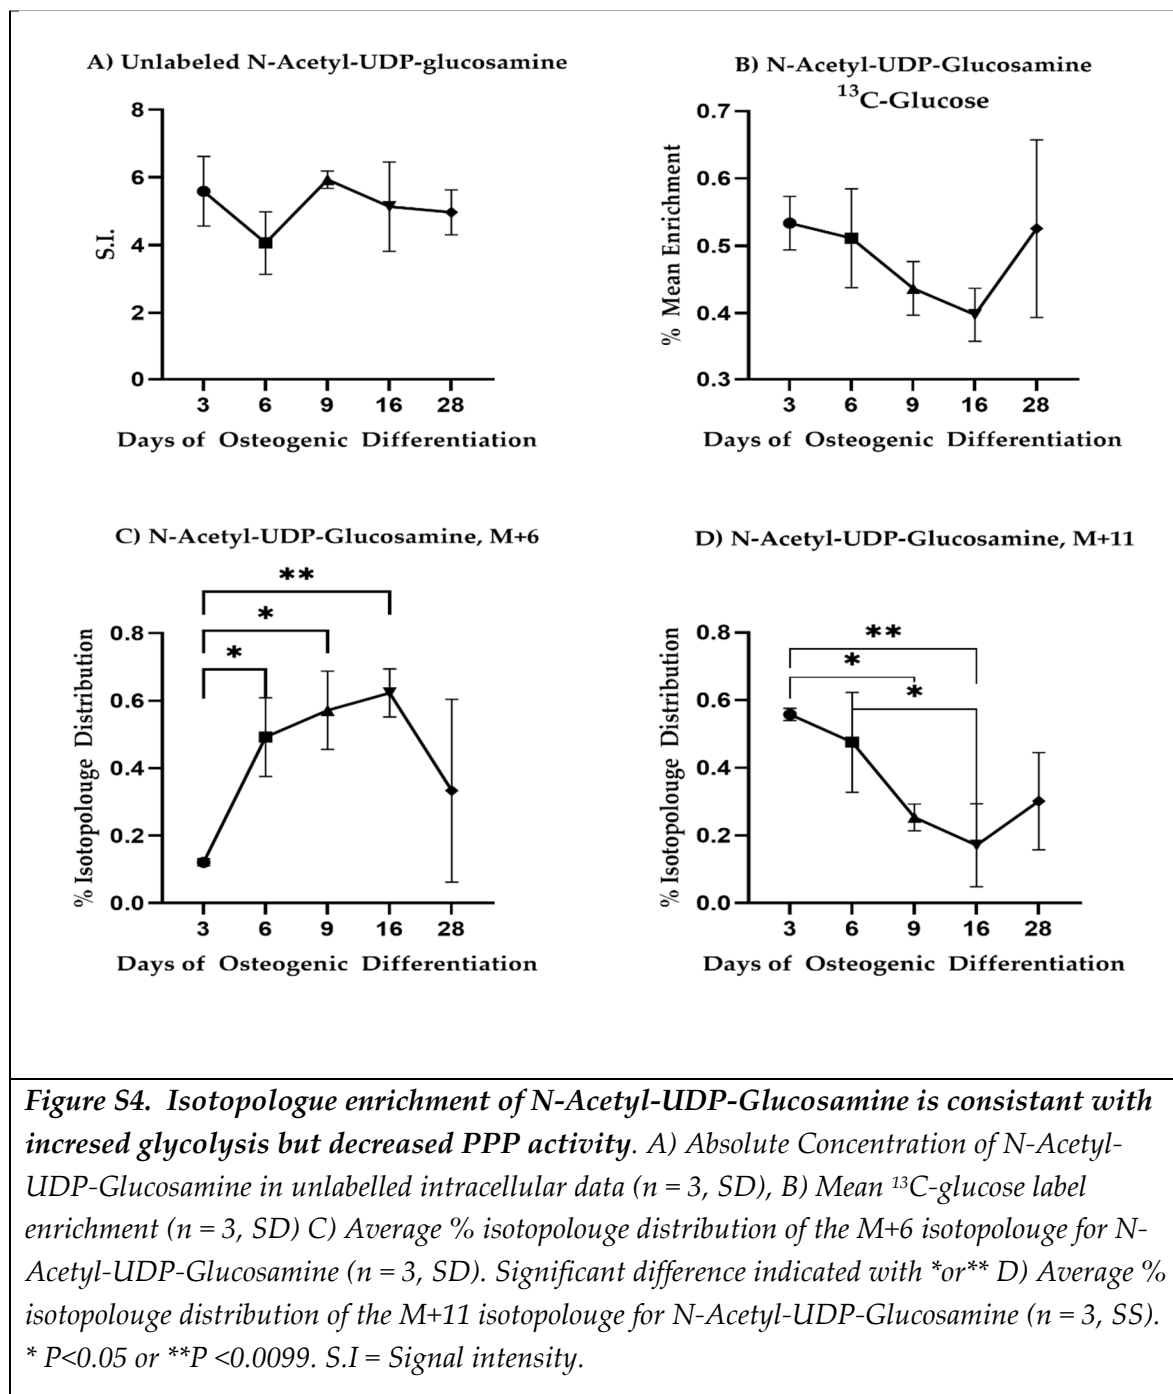

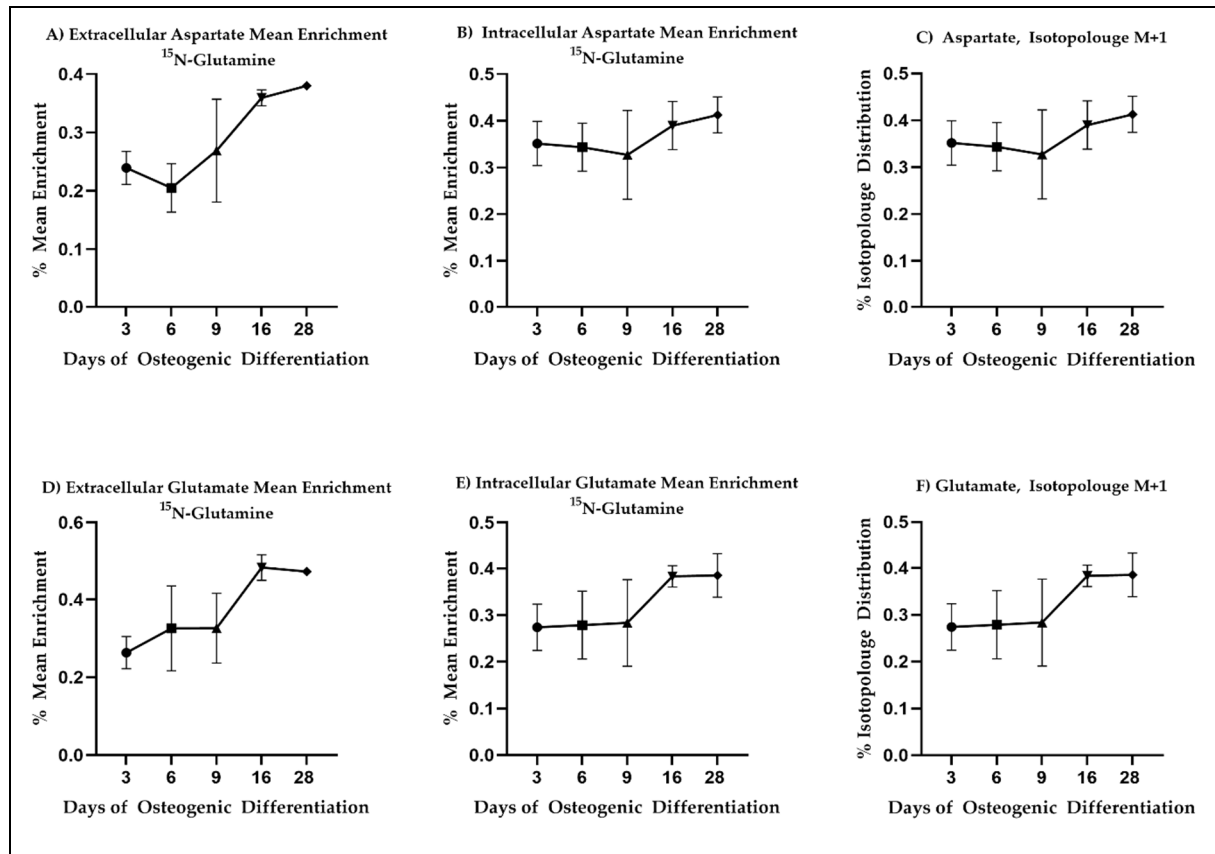

**Figure S5.**  $^{15}\text{N}$ - glutamine label incorporation and isotopologue enrichment of aspartate and glutamate. A) Extracellular mean label enrichment of aspartate ( $n = 3$ , SD), B) Intracellular mean label enrichment of aspartate ( $n = 3$ , SD) C) Average % isotopologue distribution of the M+1 isotopologue for aspartate ( $n = 3$ , SD) D) Extracellular mean label enrichment of glutamate ( $n = 3$ , SD), E) Intracellular mean label enrichment of glutamate ( $n = 3$ , SD) (n = 3, SD) F) Average % isotopologue distribution of the M+1 isotopologue for glutamate ( $n = 3$ , SD)

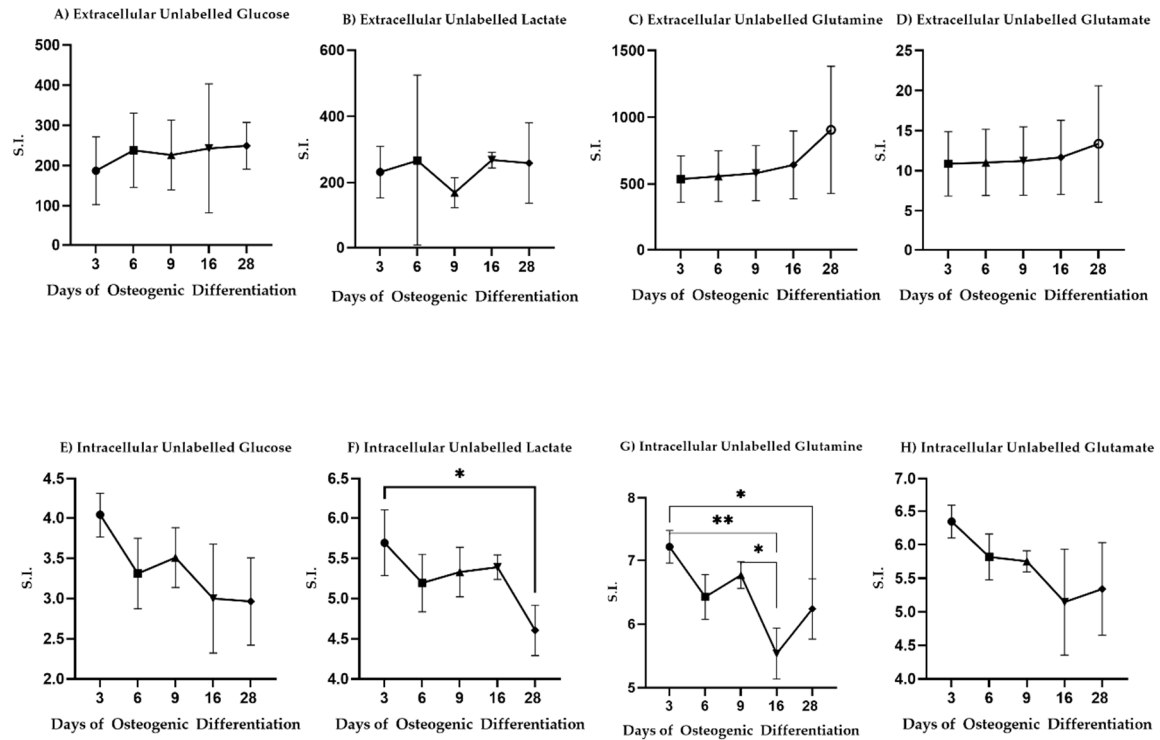

**Figure S6. Intracellular and extracellular absolute concentration levels for A) and E) glucose, B) and F) lactate, C) and G) glutamine, and D) and H) glutamate ( $n = 3$ , SD in all instances). S.I = signal intensity \*  $P < 0.05$  or \*\* $P < 0.0099$ .**
