# Supplementary material for: Metabolic and Transcriptional Changes across Osteogenic Differentiation of Mesenchymal Stromal Cells
Source: Bioengineering (Basel). 2021 Dec 10;8(12):208. doi: 10.3390/bioengineering8120208 (PMC8698318; doi:10.3390/bioengineering8120208)
Supplement: Supplementary file 1 [file bioengineering-08-00208-s001.zip]

Archive with 6 entries (6 files):
- Supplementary tables S6-S8.xlsx
- supplementary.table S10.xlsx
- supplementary.table S11.xlsx
- supplementary.table S12.xlsx
- supplementary.table S9.xlsx
- USINGM~1.pdf
