# Supplementary material for: Metabolic and Transcriptional Changes across Osteogenic Differentiation of Mesenchymal Stromal Cells
Source: Bioengineering (Basel). 2021 Dec 10;8(12):208. doi: 10.3390/bioengineering8120208 (PMC8698318; doi:10.3390/bioengineering8120208)
Supplement: Supplementary file 1 [file bioengineering-08-00208-s001.zip › Supplementary tables S6-S8.xlsx]

## Sheet: Table_S8
Metabolite_name	Ionisation Mode	D6v3	D9v3	D16v3	D28v3	D9v6	D16v6	D28v6	D16v9	D28v9	D28v16
X153.12149264793641	Negative	0.3884	0.0461475	0.0269047	0.000367753	0.601825	0.41538	0.00441764	0.996322	0.0406249	0.0696516
X158.2008090926667	Negative	0.105043	0.0136614	0.00426271	8.77189e-05	0.684242	0.287185	0.00282325	0.928739	0.0199103	0.0673417
X236.09574141229299	Negative	0.119952	0.0195257	0.00365586	0.000208162	0.763575	0.219896	0.00756848	0.789048	0.0457537	0.247491
X295.13415054412872	Negative	0.174211	0.0163305	0.00139257	0.000122994	0.558519	0.0528056	0.00269964	0.470089	0.0267334	0.337954
X326.75878912574541	Negative	0.0811761	0.00999001	0.00292312	0.000108218	0.662611	0.252114	0.00472391	0.91028	0.0369516	0.135191
X328.75556276712132	Negative	0.378085	0.0381889	0.0111359	0.000172208	0.545855	0.200168	0.00184661	0.923926	0.0181339	0.0628144
X375.21723013286493	Negative	0.0506541	0.0463561	0.0057815	0.0002436	0.999997	0.626363	0.0217119	0.658659	0.0237102	0.191398
X504.62970932638831	Negative	0.0217264	0.015577	0.00186625	0.000186226	0.999415	0.48608	0.0353686	0.605974	0.0495435	0.406753
X558.59420369825057	Negative	0.0770052	0.0313307	0.00387264	0.00011	0.975079	0.342751	0.00507246	0.644619	0.0119895	0.102559
X618.54960747171424	Negative	0.0126546	0.0436	0.00494393	0.000271426	0.923715	0.965927	0.100506	0.620159	0.0290359	0.25301
X680.50193753429232	Negative	0.146615	0.0322956	0.00374233	0.000158369	0.855611	0.185892	0.00439105	0.619979	0.0191186	0.172651
X738.46045046061079	Negative	0.168313	0.0202965	0.00217957	8.47645e-05	0.651904	0.0910284	0.00174498	0.572283	0.0127748	0.132481
X796.42114497634361	Negative	0.0747397	0.0250317	0.00493874	0.000141849	0.950471	0.43097	0.00729223	0.812762	0.0211963	0.112217
X970.29943006047188	Negative	0.0883361	0.0330056	0.00470106	0.000254731	0.965455	0.36285	0.0132622	0.701429	0.0352813	0.246555
X998.27673900167065	Negative	0.234218	0.0342445	0.00574299	0.000215583	0.711345	0.178151	0.00404077	0.763037	0.0272732	0.165661
X102.0263336454979	Negative	0.187681	0.0189783	0.014664	0.000892428	0.584616	0.491672	0.0288754	0.999784	0.274197	0.341839
X103.0024581918765	Negative	0.010739	0.0158929	0.0102068	0.00073094	0.998836	1	0.364404	0.99812	0.260137	0.379914
X116.9274786658717	Negative	0.914214	0.0405848	0.00687721	0.00301666	0.145312	0.0242584	0.0101506	0.770019	0.45598	0.976415
X132.0288740521635	Negative	0.904558	0.0338612	0.0344525	0.0024622	0.127418	0.129562	0.00852482	1	0.44143	0.435788
X133.09084616113859	Negative	0.110599	0.016567	0.00630447	0.000248698	0.735177	0.387626	0.0102908	0.963926	0.0683891	0.180299
X135.96978850394359	Negative	0.308841	0.0461406	0.0708639	0.00167442	0.704094	0.844876	0.034359	0.998478	0.239231	0.161181
X148.05010165578341	Negative	0.733687	0.0497007	0.0291002	0.000793012	0.306345	0.190622	0.00425987	0.996439	0.0974396	0.163215
X152.88260554739571	Negative	0.223062	0.0311428	0.0179882	0.00109726	0.696861	0.498111	0.0305421	0.995983	0.219168	0.352437
X166.08298583091491	Negative	0.36129	0.0255667	0.0218277	0.000574361	0.428181	0.378809	0.00816549	0.99997	0.12692	0.147815
X171.0659211408931	Negative	0.0266485	0.0232558	0.0147896	0.000785688	0.999984	0.994658	0.175447	0.998049	0.199149	0.29878
X180.03255688528341	Negative	0.314921	0.0170939	0.00675613	0.000981436	0.355512	0.151854	0.0180747	0.968901	0.330073	0.648919
X180.97182796082461	Negative	0.094811	0.0266627	0.00185858	0.000296381	0.91842	0.136407	0.015006	0.416569	0.0532663	0.621015
X199.0053361638069	Negative	0.230724	0.0243888	0.0222353	0.00351174	0.594186	0.560521	0.109133	0.999997	0.696966	0.72989
X205.1296693815633	Negative	0.196828	0.01964	0.00388948	0.000282918	0.578478	0.143846	0.00676358	0.808664	0.0681627	0.330494
X207.0109589953268	Negative	0.0997324	0.0142388	0.0104756	0.000438561	0.718242	0.604332	0.0234073	0.999551	0.161969	0.216778
X207.1268800437972	Negative	0.178454	0.021241	0.00448039	0.000248928	0.645832	0.183544	0.00637804	0.831234	0.0532843	0.251255
X208.01464267296791	Negative	0.0707082	0.0102223	0.0131879	0.00033841	0.721021	0.808751	0.023834	0.999783	0.163546	0.127398
X236.09443469150801	Negative	0.142612	0.0397538	0.0383564	0.000621428	0.913998	0.906184	0.0249511	1	0.0906538	0.0939008
X240.92737729418221	Negative	0.312299	0.0466796	0.0176835	0.00134043	0.703504	0.368386	0.0262483	0.967045	0.187501	0.428853
X248.95926674898229	Negative	0.140764	0.0496798	0.00339915	0.000683148	0.956111	0.175433	0.0283873	0.432686	0.0815726	0.755916
X269.12178689998098	Negative	0.144284	0.00920952	0.00550085	0.000343038	0.425492	0.27388	0.0118199	0.996271	0.183917	0.29811
X283.13048477219718	Negative	0.204756	0.0334562	0.0860043	0.00712998	0.754991	0.974512	0.250978	0.970225	0.842411	0.51456
X285.12209538303563	Negative	0.178972	0.0133547	0.00534881	0.000374819	0.476512	0.21783	0.0105709	0.969341	0.142676	0.336006
X297.15189925356708	Negative	0.0953901	0.0238385	0.0123398	0.000852707	0.891798	0.682152	0.0554175	0.991706	0.21299	0.377045
X297.15147841473379	Negative	0.253801	0.0485684	0.0636356	0.00115405	0.799077	0.877514	0.0280435	0.999754	0.153357	0.118297
X298.15443709749161	Negative	0.249478	0.0466948	0.0707275	0.00104483	0.792707	0.907621	0.0254437	0.998661	0.142416	0.0951259
X298.15486593871208	Negative	0.109982	0.0251838	0.0143447	0.000935301	0.868901	0.685236	0.0535156	0.995485	0.223925	0.364222
X299.15012640113878	Negative	0.112309	0.0192295	0.00947949	0.000594539	0.781017	0.52341	0.030254	0.988822	0.173613	0.329619
X311.16750725917149	Negative	0.143417	0.0442383	0.0327154	0.00187502	0.934011	0.865475	0.0909395	0.999622	0.277958	0.357591
X312.17058706355027	Negative	0.13993	0.0462408	0.0347588	0.00243537	0.94611	0.887724	0.124304	0.999696	0.342988	0.428974
X313.1667098304664	Negative	0.147966	0.042707	0.030736	0.00233067	0.920863	0.838732	0.111979	0.999468	0.351542	0.453129
X316.94708758052639	Negative	0.145666	0.0276159	0.00365111	0.000897329	0.811291	0.182466	0.0380532	0.667299	0.19677	0.836042
X317.9502823064991	Negative	0.0761497	0.0344564	0.00242164	0.000453508	0.98422	0.221621	0.0320652	0.429755	0.0708996	0.709837
X324.17217449618391	Negative	0.0611486	0.0346722	0.0166712	0.000636795	0.995545	0.911816	0.0609175	0.988044	0.106752	0.214412
X330.75275402082718	Negative	0.0339812	0.0163705	0.00574772	0.000564181	0.988143	0.76593	0.0940878	0.952014	0.190248	0.47075
X366.8742599460989	Negative	0.314477	0.046142	0.0334607	0.00172468	0.696404	0.579765	0.0347824	0.999515	0.246515	0.324794
X376.90365224890053	Negative	0.285681	0.0424177	0.0145884	0.00122715	0.706835	0.342439	0.0263047	0.953716	0.186255	0.459239
X384.93449286109689	Negative	0.101844	0.0428092	0.00310954	0.000689778	0.9778	0.218085	0.0401163	0.449376	0.0955616	0.792258
X385.93762058158887	Negative	0.052216	0.0232991	0.00267351	0.000363514	0.983202	0.338075	0.0353738	0.604662	0.0792229	0.568281
X417.20891232413749	Negative	0.304279	0.0466485	0.0509519	0.00314586	0.714252	0.745078	0.0708685	0.999997	0.425611	0.397876
X417.20900365075198	Negative	0.250522	0.0400288	0.0363211	0.00275612	0.739497	0.705345	0.0766531	0.999996	0.42785	0.459686
X418.21262982354989	Negative	0.409322	0.0426296	0.058939	0.00421439	0.548664	0.666292	0.0674978	0.999498	0.565942	0.45321
X424.83218588558822	Negative	0.287106	0.0403219	0.0177211	0.00083621	0.686639	0.398917	0.0166704	0.9818	0.127078	0.272166
X442.67631305800109	Negative	0.0487175	0.0128915	0.00190402	0.000229873	0.904147	0.259505	0.0209139	0.68448	0.079506	0.49195
X452.92198112601	Negative	0.108821	0.0483186	0.00363874	0.000934005	0.982337	0.239477	0.0540112	0.466382	0.12126	0.850887
X506.62643270166302	Negative	0.0990342	0.0125472	0.00124664	0.000223074	0.674529	0.0834126	0.00998781	0.518417	0.0785576	0.652539
X510.66229616125747	Negative	0.129429	0.0414237	0.0136836	0.000433807	0.941334	0.60662	0.0177046	0.947298	0.0558163	0.166117
X510.88108384816582	Negative	0.173128	0.0366984	0.014509	0.00130777	0.841916	0.518075	0.0494198	0.971516	0.227474	0.486216
X512.66043108320889	Negative	0.248064	0.0493223	0.0260183	0.00129008	0.8121	0.588223	0.0327763	0.992957	0.170894	0.303055
X545.4543835837635	Negative	0.225163	0.0285182	0.00908392	0.000320364	0.661286	0.285566	0.00685114	0.939156	0.0550701	0.171686
X564.58576592834072	Negative	0.052045	0.0193761	0.0112276	0.000349548	0.965068	0.851124	0.0337534	0.995868	0.0905891	0.155241
X572.61615051681906	Negative	0.141191	0.0344789	0.0274148	0.000737324	0.883385	0.819133	0.0310431	0.999872	0.127648	0.15893
X578.86905461416109	Negative	0.165747	0.0462169	0.0181427	0.00147094	0.912262	0.616512	0.0593179	0.97115	0.208881	0.455549
X588.89772102961285	Negative	0.0835563	0.0241396	0.00244156	0.000762017	0.924173	0.205227	0.0553621	0.555172	0.185929	0.901165
X589.90207825607945	Negative	0.132089	0.0465036	0.00442448	0.000778319	0.956153	0.241999	0.0355263	0.553558	0.101724	0.711374
X616.55376451662823	Negative	0.059176	0.0244109	0.00274467	0.000740667	0.976481	0.312176	0.0755954	0.598201	0.178208	0.85957
X618.76613161194166	Negative	0.204654	0.0498257	0.02135	0.000852984	0.876153	0.593625	0.02491	0.979865	0.105911	0.235477
X646.85602130752613	Negative	0.157107	0.0427673	0.0131281	0.00142689	0.907726	0.518446	0.0606132	0.934575	0.217084	0.557734
X656.88491940570702	Negative	0.0939823	0.0458697	0.00369569	0.00111832	0.988955	0.277174	0.0775249	0.489806	0.156317	0.901289
X657.89377493127108	Negative	0.0693371	0.0406203	0.00336761	0.000546889	0.996437	0.329864	0.0445204	0.496688	0.0759416	0.662774
X704.81493225879888	Negative	0.176206	0.0320785	0.0212621	0.00142996	0.794925	0.651146	0.0537896	0.998699	0.280559	0.393875
X714.8448632727152	Negative	0.141175	0.0366822	0.0123399	0.0013456	0.898411	0.535767	0.0633613	0.949769	0.234425	0.556106
X724.87284397053895	Negative	0.0914608	0.0286198	0.00303921	0.00105767	0.938981	0.23527	0.0746525	0.581117	0.227482	0.932195
X725.88178482362332	Negative	0.0505503	0.0286018	0.00294891	0.000746656	0.995481	0.378669	0.0892094	0.569316	0.154885	0.839867
X774.80174014212128	Negative	0.252855	0.0475113	0.0171639	0.00340722	0.79338	0.434942	0.0955245	0.961012	0.4481	0.806206
X790.43037401904689	Negative	0.0266219	0.0095606	0.00441425	0.000202155	0.958271	0.753079	0.0321965	0.982553	0.0909976	0.198695
X792.86115049972261	Negative	0.0703908	0.0227729	0.00236499	0.00088416	0.944935	0.232383	0.078573	0.563452	0.230887	0.94374
X793.86886162771509	Negative	0.106357	0.0298919	0.00271667	0.000749429	0.917861	0.182607	0.0424439	0.521144	0.149156	0.866517
X804.45408441501058	Negative	0.0962116	0.0426623	0.0152547	0.00046943	0.982449	0.755339	0.0264328	0.959364	0.0598449	0.164313
X825.39790155426999	Negative	0.0605305	0.0254134	0.0251991	0.00147109	0.978137	0.977354	0.162631	1	0.350557	0.352978
X850.38777416035327	Negative	0.0215736	0.0172772	0.0053561	0.000395124	0.999883	0.879867	0.0949722	0.929877	0.118251	0.354474
X850.82081839068371	Negative	0.150655	0.0426974	0.00715552	0.00157227	0.916906	0.333416	0.0708064	0.767011	0.24037	0.817232
X852.38293290927425	Negative	0.0816072	0.0423942	0.0105691	0.00067765	0.992225	0.68175	0.0491716	0.888767	0.0944521	0.342805
X854.37838724414837	Negative	0.0703472	0.0390826	0.0178691	0.000507431	0.99488	0.895887	0.0399749	0.984803	0.071942	0.154775
X856.37480185357788	Negative	0.0445961	0.0342638	0.00553775	0.000471479	0.999779	0.656072	0.0575695	0.749684	0.0748341	0.410763
X860.8488422311267	Negative	0.103768	0.0306257	0.00272739	0.00112737	0.92779	0.187687	0.070792	0.514146	0.228984	0.962836
X861.86106131870554	Negative	0.0920149	0.0457294	0.00705751	0.00240619	0.989974	0.48707	0.184764	0.738661	0.342331	0.939044
X894.83945796498097	Negative	0.0543011	0.0485957	0.00321621	0.00239762	0.999993	0.385849	0.295659	0.420313	0.324565	0.99949
X918.80902691068354	Negative	0.152601	0.0402142	0.00866476	0.00160504	0.900765	0.38734	0.0715254	0.848147	0.258782	0.760025
X957.81276929752767	Negative	0.0950115	0.0457805	0.00434843	0.0011639	0.988193	0.318895	0.0803264	0.552472	0.163696	0.869232
X986.79651202030993	Negative	0.159313	0.0427778	0.00836278	0.00162332	0.904479	0.36286	0.0692523	0.818941	0.247904	0.776756
X991.80709585836087	Negative	0.0524422	0.027563	0.00346981	0.000698475	0.992812	0.422525	0.0794142	0.647804	0.148566	0.757455
X996.82377163007777	Negative	0.0972829	0.0303656	0.00217209	0.00111413	0.938373	0.157355	0.0745428	0.431231	0.227887	0.986068
X130.03956421277621	Negative	0.673387	0.205712	0.0144978	0.00140105	0.845249	0.114755	0.00944281	0.454014	0.0444249	0.514209
X149.12217388608209	Negative	0.332463	0.0688112	0.0335441	0.000477593	0.809389	0.556492	0.00723181	0.989083	0.0378908	0.0776596
X160.84107133698521	Negative	0.143444	0.0965453	0.0464815	0.00070148	0.998753	0.942673	0.0287436	0.988126	0.0432419	0.0899275
X186.93762449073139	Negative	0.24957	0.241875	0.0170515	0.00125066	1	0.437594	0.0313968	0.449175	0.0325254	0.414883
X207.0109290633456	Negative	0.921795	0.20445	0.0842752	0.00105088	0.557943	0.274666	0.0031688	0.972557	0.0319461	0.0804408
X212.02320930001989	Negative	0.200637	0.055361	0.0241847	0.000491327	0.906757	0.647266	0.0130696	0.981549	0.0488359	0.111017
X293.17671066697471	Negative	0.190248	0.151171	0.112119	0.000753266	0.999833	0.995881	0.0232264	0.999575	0.0296557	0.0404558
X293.17699864385918	Negative	0.52011	0.0957293	0.0468939	0.000775258	0.722733	0.466452	0.00725056	0.989144	0.0492413	0.100426
X294.17977752977151	Negative	0.190318	0.130164	0.0711312	0.000519677	0.998827	0.961502	0.0148044	0.993896	0.0220201	0.0407236
X421.22464665097891	Negative	0.409368	0.062668	0.0163764	0.000534502	0.688453	0.26018	0.00644556	0.90231	0.0479008	0.178729
X427.97036037329508	Negative	0.203332	0.118388	0.0224169	0.000772117	0.995398	0.614103	0.0222676	0.813169	0.0394121	0.202083
X428.96462923174658	Negative	0.254446	0.107651	0.0193802	0.000667744	0.97314	0.47335	0.0146222	0.797686	0.0364301	0.19668
X444.67347354052322	Negative	0.345435	0.0998355	0.0169314	0.000393045	0.899986	0.321769	0.00548406	0.77826	0.0203763	0.119844
X500.27708072377879	Negative	0.559854	0.862751	0.763281	0.00870327	0.975952	0.995524	0.0931599	0.9995	0.0383322	0.0529886
X500.63526683783181	Negative	0.532443	0.342057	0.0972772	0.00245557	0.99472	0.716185	0.0258834	0.896618	0.046825	0.179032
X501.2805334111481	Negative	0.372873	0.807995	0.750765	0.00876056	0.919458	0.950712	0.161473	0.999957	0.0465147	0.0553516
X508.6256747466478	Negative	0.549723	0.160887	0.0114253	0.000823132	0.866379	0.126017	0.00717367	0.460862	0.0309004	0.388091
X540.89107234577671	Negative	0.99968	0.78675	0.842342	0.00879896	0.872442	0.915201	0.0116379	0.999951	0.0499353	0.0416989
X570.61830931629288	Negative	0.782972	0.4895	0.144931	0.00179224	0.981707	0.610457	0.00915547	0.882316	0.0205529	0.085516
X608.88017152028692	Negative	0.988716	0.662728	0.611261	0.00314787	0.892644	0.856006	0.00616938	0.999981	0.023792	0.0273848
X674.51328508168842	Negative	0.597523	0.193218	0.0222467	0.000889035	0.883001	0.210475	0.00690641	0.631563	0.027856	0.237189
X676.86613846959074	Negative	0.904752	0.457874	0.312295	0.00116187	0.900814	0.759298	0.00379789	0.997531	0.0137569	0.0222344
X732.47150954845233	Negative	0.655724	0.165834	0.0388453	0.000523887	0.788882	0.29913	0.0032649	0.870389	0.0172898	0.0752898
X736.4655756575487	Negative	0.1273	0.0735544	0.00362204	9.96438e-05	0.995781	0.206037	0.00278299	0.335379	0.00464815	0.0960307
X744.85463623029796	Negative	0.510293	0.263524	0.106517	0.000376499	0.980752	0.769813	0.00322748	0.967484	0.00704851	0.0180783
X798.41894363158315	Negative	0.422759	0.199453	0.0514402	0.000922474	0.976296	0.601196	0.0117079	0.891167	0.028123	0.112484
X812.84108221505778	Negative	0.740377	0.4249	0.387411	0.00240279	0.975627	0.961908	0.0142723	0.99999	0.034677	0.0391092
X880.83086547354219	Negative	0.592022	0.205648	0.0762143	0.000440818	0.902901	0.566715	0.00314444	0.959523	0.0111506	0.0309149
X968.30260875373142	Negative	0.0911455	0.0740546	0.0184623	0.000559924	0.99991	0.834859	0.0347691	0.891431	0.0428985	0.168351
X77.053090049228913	Negative	0.619442	0.075703	0.0986736	0.0105391	0.537314	0.634541	0.0963467	0.999761	0.707852	0.610572
X77.053075045464553	Negative	0.200777	0.131762	0.0306058	0.00186141	0.998218	0.731641	0.063176	0.871263	0.0983966	0.374678
X78.957532768360622	Negative	0.829708	0.0704	0.318592	0.0210531	0.320722	0.855272	0.105593	0.832092	0.930957	0.414865
X78.957538811825103	Negative	0.902212	0.570309	0.995446	0.0387576	0.961263	0.985463	0.146465	0.773853	0.362395	0.068543
X89.022920342767534	Negative	0.37056	0.647082	0.772478	0.0130066	0.982994	0.938854	0.236622	0.999276	0.110538	0.0779249
X92.064233519843015	Negative	0.103097	0.210191	0.0371499	0.00316754	0.987192	0.960443	0.219633	0.780463	0.108092	0.504347
X96.968240466305986	Negative	0.999966	0.490436	0.89923	0.049618	0.548228	0.933521	0.0584826	0.926431	0.515164	0.186977
X96.968115138020693	Negative	0.98182	0.0511288	0.0439379	0.00771033	0.115704	0.099803	0.0171935	0.999975	0.732137	0.783497
X102.9555418313853	Negative	0.445068	0.0832739	0.0366322	0.00196966	0.75007	0.457538	0.026071	0.981996	0.164559	0.341364
X104.9525657043465	Negative	0.4811	0.0867292	0.0460182	0.00246437	0.727035	0.49843	0.0301032	0.993097	0.200151	0.34806
X106.0397655711571	Negative	0.872712	0.75851	0.136856	0.0257734	0.999107	0.481765	0.110928	0.615314	0.159025	0.810039
X106.0397502676812	Negative	0.866121	0.619354	0.134508	0.00836646	0.987832	0.484094	0.0363306	0.748576	0.0760765	0.417017
X106.03971504499211	Negative	0.56934	0.135543	0.152244	0.0194662	0.796978	0.834526	0.199795	0.99999	0.718723	0.675174
X108.9007550351087	Negative	0.918005	0.500862	0.380838	0.0207265	0.915221	0.818479	0.0739602	0.99916	0.251673	0.344467
X110.0235395012477	Negative	0.964695	0.112953	0.460552	0.0344975	0.283218	0.809007	0.0928286	0.834792	0.93385	0.4227
X110.8978593319863	Negative	0.925603	0.516442	0.343321	0.018913	0.916706	0.764612	0.0649851	0.996228	0.222691	0.354917
X112.8952404618276	Negative	0.945332	0.489034	0.286669	0.012941	0.872147	0.649651	0.0396016	0.991148	0.167808	0.308355
X112.9841944138775	Negative	0.262002	0.0779426	0.00534196	0.000819096	0.916712	0.147019	0.0180539	0.444495	0.0647748	0.660874
X113.9875316594635	Negative	0.300418	0.0724062	0.0174145	0.00204201	0.860153	0.377403	0.0444938	0.88242	0.194933	0.601853
X115.08021533134411	Negative	0.592053	0.0775128	0.0374907	0.000841418	0.572839	0.336	0.00658068	0.988583	0.0672651	0.137265
X118.03981115326511	Negative	0.666581	0.122429	0.180697	0.0135794	0.668006	0.808635	0.109514	0.998738	0.624779	0.478808
X118.0396288286382	Negative	0.998429	0.488501	0.439613	0.0142429	0.351635	0.31178	0.0093465	0.999979	0.184149	0.210586
X120.0548999732317	Negative	0.2576	0.0668207	0.0359486	0.00730415	0.885632	0.690338	0.203963	0.993741	0.615155	0.82871
X130.03989531633289	Negative	0.707424	0.717107	0.230074	0.0262151	1	0.853415	0.18538	0.845674	0.180735	0.621765
X131.03530268703449	Negative	0.999077	0.703556	0.374942	0.0219871	0.829292	0.497132	0.0320511	0.969609	0.158699	0.367208
X131.03532053251729	Negative	0.390776	0.268898	0.0815897	0.0203916	0.998152	0.799998	0.330819	0.920107	0.469373	0.892076
X132.05484171392169	Negative	0.294374	0.13962	0.146597	0.0110795	0.982335	0.98606	0.261823	1	0.500923	0.483334
X133.99093222711511	Negative	0.566	0.172916	0.116085	0.00166552	0.874685	0.746625	0.0152803	0.998643	0.0653826	0.0988113
X135.96988407821621	Negative	0.352311	0.1616	0.0967535	0.0211811	0.97694	0.886515	0.379086	0.996524	0.683178	0.857187
X136.0981655074354	Negative	0.486381	0.140429	0.152901	0.00255233	0.876202	0.898194	0.0308221	0.999997	0.130265	0.119496
X136.97181083101441	Negative	0.343655	0.121183	0.100851	0.0107473	0.941332	0.903804	0.21578	0.999941	0.541662	0.609815
X137.96678529040909	Negative	0.253348	0.0997072	0.041542	0.00543268	0.964738	0.747898	0.155082	0.97702	0.372098	0.674384
X138.01829371733081	Negative	0.969081	0.820779	0.575535	0.0299267	0.990474	0.89067	0.0777913	0.989963	0.152728	0.28895
X142.01139979811771	Negative	0.418717	0.947913	0.342642	0.0281121	0.805897	0.999807	0.398652	0.72048	0.0852417	0.481486
X146.95972894444091	Negative	0.495069	0.16568	0.0920634	0.0112023	0.911643	0.733971	0.143443	0.994165	0.443828	0.659233
X147.06656453932209	Negative	0.147845	0.228073	0.124279	0.0148874	0.997887	0.99995	0.587373	0.992584	0.425682	0.653335
X151.07626545335779	Negative	0.804637	0.536552	0.457384	0.00845366	0.986605	0.96524	0.0452985	0.999872	0.0964042	0.120579
X154.87956255465809	Negative	0.351503	0.0506902	0.0512302	0.000501221	0.681601	0.685419	0.00717806	1	0.054681	0.054105
X154.99056031375301	Negative	0.412692	0.560555	0.0622161	0.024693	0.998415	0.68203	0.365286	0.524902	0.253373	0.972588
X157.0507186644472	Negative	0.57226	0.551627	0.0952607	0.00922203	0.999999	0.668708	0.0955516	0.689395	0.101078	0.573383
X157.05071802443291	Negative	0.423636	0.310081	0.0968924	0.0358079	0.998955	0.821577	0.472096	0.92169	0.610526	0.963901
X159.0655926973034	Negative	0.10452	0.0791688	0.0330498	0.00328133	0.999709	0.940383	0.224586	0.977527	0.287833	0.559491
X160.05197513320579	Negative	0.133076	0.484305	0.0695191	0.0192816	0.862947	0.99198	0.722068	0.643507	0.246193	0.915776
X162.0968331917114	Negative	0.56187	0.198855	0.170423	0.00258207	0.913214	0.87363	0.0252131	0.999964	0.0919267	0.108196
X162.83812370238491	Negative	0.435368	0.508993	0.132372	0.00512303	0.999895	0.898618	0.0766626	0.84133	0.06171	0.277234
X164.83526617099361	Negative	0.586097	0.201337	0.399406	0.00948435	0.901336	0.996112	0.0947019	0.983526	0.328943	0.160673
X170.9429387754528	Negative	0.519178	0.076353	0.0204301	0.00235976	0.64129	0.237159	0.0257058	0.908002	0.215369	0.60222
X172.0617409911915	Negative	0.311846	0.306261	0.0605676	0.0332088	1	0.793156	0.58066	0.800046	0.588457	0.994451
X172.06138962040069	Negative	0.870073	0.44902	0.134125	0.0115055	0.925325	0.478023	0.0497971	0.891971	0.167511	0.529223
X174.9548110449326	Negative	0.631416	0.213694	0.176176	0.0322875	0.887255	0.829898	0.270271	0.999911	0.726473	0.79707
X178.11994036382131	Negative	0.292809	0.0742802	0.0347691	0.000976807	0.875074	0.62449	0.0195734	0.986578	0.0837612	0.174501
X179.12327304190711	Negative	0.211537	0.0936368	0.0397522	0.000933099	0.979279	0.800115	0.0267362	0.97885	0.0628788	0.146081
X182.94280471576039	Negative	0.947317	0.26453	0.264061	0.0118021	0.6113	0.610558	0.0355901	1	0.307945	0.308472
X190.1485329099462	Negative	0.127645	0.312533	0.0595215	0.00553708	0.965957	0.985591	0.307292	0.786641	0.12519	0.551148
X191.15105253442081	Negative	0.246698	0.449021	0.0872588	0.00832311	0.988247	0.950001	0.241169	0.762087	0.121635	0.567019
X194.9726584518819	Negative	0.860999	0.252975	0.0631073	0.0171514	0.735335	0.266075	0.0773166	0.876312	0.434527	0.911208
X194.9728765598548	Negative	0.179014	0.0678188	0.173054	0.0403162	0.963833	1	0.858354	0.968241	0.996801	0.868186
X195.80987620296921	Negative	0.349478	0.206183	0.0882689	0.00662333	0.994161	0.864978	0.13192	0.976356	0.232676	0.478645
X196.9705684917534	Negative	0.109151	0.0641106	0.139915	0.0231163	0.996344	0.999799	0.847309	0.984094	0.96111	0.767048
X197.80667247169339	Negative	0.442721	0.222445	0.12844	0.0113488	0.981455	0.885644	0.168308	0.994933	0.349993	0.540201
X198.91673154256841	Negative	0.572862	0.297803	0.391858	0.00807203	0.977791	0.996428	0.0832064	0.999417	0.192448	0.14023
X198.91670181036349	Negative	0.994698	0.131743	0.584624	0.0322973	0.229232	0.794375	0.0584892	0.773517	0.885096	0.301823
X199.80380157531641	Negative	0.306716	0.195017	0.094082	0.0062079	0.997	0.918208	0.143712	0.986451	0.231074	0.434369
X201.8008971052659	Negative	0.342027	0.260847	0.144415	0.0136929	0.999523	0.968307	0.270516	0.992799	0.353823	0.565401
X201.80083444248859	Negative	0.112502	0.234992	0.198302	0.00333122	0.984902	0.994575	0.212927	0.999943	0.101104	0.121335
X205.01678711018911	Negative	0.60088	0.453695	0.197174	0.0167813	0.998624	0.886191	0.160192	0.964417	0.235522	0.52082
X209.15363447347579	Negative	0.730649	0.200203	0.0783657	0.00762301	0.786717	0.443342	0.0507385	0.966858	0.272655	0.573113
X210.07542148964251	Negative	0.99584	0.943374	0.349223	0.0241851	0.995078	0.528772	0.0421962	0.738377	0.0754527	0.423784
X213.048006038354	Negative	0.269398	0.337477	0.329266	0.0147444	0.999768	0.999855	0.364951	1	0.292775	0.300316
X213.08776475616821	Negative	0.0563959	0.11607	0.0897753	0.0102361	0.988411	0.997879	0.798104	0.999782	0.539577	0.634651
X215.09920931083639	Negative	0.533548	0.09693	0.056322	0.0013446	0.713795	0.51639	0.0131136	0.996118	0.0929663	0.15781
X217.109110018076	Negative	0.681404	0.576239	0.376813	0.0179193	0.99968	0.976685	0.138264	0.994662	0.181685	0.308368
X218.87270529190141	Negative	0.518634	0.108275	0.0776916	0.00201707	0.767461	0.648241	0.0216034	0.999412	0.130903	0.180198
X220.86964560670171	Negative	0.563569	0.113073	0.0684543	0.00185904	0.739618	0.556094	0.017402	0.997059	0.114664	0.186155
X220.89841205362549	Negative	0.631097	0.192052	0.42217	0.00571134	0.856935	0.994532	0.0493566	0.972324	0.216599	0.0895227
X221.15279223113919	Negative	0.532649	0.372706	0.103752	0.0073324	0.997524	0.739011	0.0841644	0.886773	0.13536	0.459253
X223.23830811239131	Negative	0.254186	0.0749246	0.0584825	0.00529177	0.915597	0.85434	0.150478	0.999823	0.454313	0.540198
X225.08812351142581	Negative	0.137752	0.317961	0.138176	0.00947978	0.972629	1	0.451041	0.972966	0.20891	0.449981
X228.901340655327	Negative	0.427581	0.0897566	0.0443205	0.00184677	0.793298	0.541999	0.0255761	0.989648	0.142877	0.273404
X230.89880605462611	Negative	0.498265	0.10735	0.047958	0.00244623	0.783902	0.495427	0.0284044	0.982842	0.162267	0.334256
X238.93026263699531	Negative	0.326185	0.0587787	0.0247475	0.00202178	0.765474	0.458522	0.0398768	0.978387	0.233358	0.472355
X242.07848585896249	Negative	0.582328	0.316533	0.444372	0.00682788	0.981781	0.998894	0.0681181	0.998478	0.152579	0.100753
X242.88022264961609	Negative	0.914756	0.267685	0.61362	0.0189382	0.679849	0.968956	0.0686025	0.948468	0.446226	0.173923
X243.08188394181221	Negative	0.492122	0.298074	0.406208	0.00528557	0.992822	0.999786	0.0669639	0.999041	0.125992	0.0867494
X247.11039506504591	Negative	0.296973	0.17648	0.165625	0.00334133	0.995104	0.992556	0.0778622	0.999999	0.137415	0.146606
X248.07745858584479	Negative	0.83668	0.197038	0.192406	0.0219298	0.66705	0.657674	0.107424	1	0.618534	0.627958
X249.15131755817711	Negative	0.725653	0.418407	0.117365	0.0100893	0.977707	0.591953	0.0688547	0.881167	0.161184	0.530215
X249.96235693610771	Negative	0.203283	0.0681035	0.0036933	0.000598729	0.944361	0.131783	0.0163908	0.363333	0.0506988	0.666794
X254.92525009907581	Negative	0.224092	0.712381	0.142003	0.0103056	0.841073	0.997461	0.320369	0.677663	0.0730534	0.469304
X255.10499293872689	Negative	0.0934491	0.0642577	0.0558097	0.00112913	0.999079	0.99683	0.0788495	0.999981	0.1143	0.131035
X256.76609251331149	Negative	0.981866	0.629321	0.475263	0.033811	0.894503	0.768491	0.0770466	0.99844	0.282663	0.402611
X258.76305295885811	Negative	0.977087	0.644095	0.480924	0.0250847	0.915924	0.792049	0.0604269	0.998077	0.209144	0.312133
X260.760239886298	Negative	0.976063	0.547357	0.355901	0.0154746	0.852814	0.657856	0.0374884	0.994955	0.170405	0.288766
X262.758081082167	Negative	0.894403	0.519596	0.345731	0.01918	0.945176	0.813862	0.0760045	0.996218	0.223737	0.35652
X265.01947337307217	Negative	0.65411	0.679906	0.0741154	0.0282148	0.999999	0.496449	0.226998	0.472115	0.212855	0.967898
X265.14637390084619	Negative	0.654239	0.121018	0.0713719	0.00120066	0.675967	0.483273	0.008358	0.996385	0.0651062	0.110637
X266.14922622384591	Negative	0.835037	0.100228	0.034267	0.00135684	0.420334	0.165972	0.0057598	0.953091	0.090832	0.251186
X266.80274962391439	Negative	0.82245	0.240571	0.344522	0.0126822	0.761587	0.886571	0.0650124	0.998604	0.357614	0.250591
X269.12063516873491	Negative	0.380787	0.067164	0.118666	0.00181273	0.745845	0.912408	0.0290979	0.995212	0.184512	0.106232
X270.79677465721602	Negative	0.980757	0.868744	0.513643	0.0273495	0.992781	0.808997	0.0632248	0.958023	0.119266	0.310079
X271.2244416784464	Negative	0.179752	0.0568658	0.0288251	0.000522691	0.936134	0.752252	0.0158392	0.991165	0.0513544	0.100781
X274.79122832729081	Negative	0.558441	0.179082	0.0355488	0.00289921	0.889435	0.347093	0.0289295	0.821682	0.11643	0.48589
X276.83176318713231	Negative	0.592585	0.117596	0.115038	0.00253523	0.725756	0.717784	0.0227078	1	0.154217	0.15756
X277.10029812273569	Negative	0.636689	0.102429	0.0549805	0.00144738	0.631204	0.413011	0.0107967	0.993447	0.0956564	0.174908
X278.8287055960933	Negative	0.41785	0.105301	0.075	0.00173931	0.851839	0.742726	0.0246316	0.999362	0.114356	0.159114
X280.82595512940458	Negative	0.643383	0.123245	0.0851688	0.00191221	0.693492	0.5564	0.0144718	0.999081	0.108493	0.156043
X283.13395186463072	Negative	0.494698	0.0768649	0.107308	0.00228816	0.669283	0.787142	0.0266377	0.9994	0.207438	0.15125
X286.86061520383942	Negative	0.517398	0.109195	0.0688769	0.00190257	0.771539	0.605297	0.0203024	0.997893	0.121783	0.189649
X288.85743263557907	Negative	0.499001	0.125184	0.0624143	0.00184921	0.832757	0.58849	0.0207178	0.989745	0.1029	0.201645
X288.88643130553169	Negative	0.62996	0.0914705	0.248433	0.0166672	0.595906	0.925434	0.147558	0.955957	0.801955	0.431767
X290.85491961584438	Negative	0.34673	0.0837296	0.0698395	0.00182541	0.852944	0.797863	0.0329664	0.999948	0.150876	0.179215
X296.88933120057823	Negative	0.410994	0.0801218	0.0409209	0.0021274	0.772719	0.532203	0.0316075	0.991449	0.185116	0.334807
X298.88658056465471	Negative	0.415983	0.0810098	0.0369287	0.00174426	0.771156	0.490812	0.0248566	0.984713	0.148258	0.302289
X299.08251495453521	Negative	0.87598	0.205718	0.299257	0.00590857	0.632467	0.782059	0.0242945	0.998549	0.209092	0.140558
X299.15000150696159	Negative	0.377923	0.0530767	0.0688922	0.00138587	0.665466	0.757847	0.021613	0.999785	0.172475	0.134594
X304.90857556829008	Negative	0.900786	0.36821	0.377484	0.00854051	0.829394	0.838666	0.0323094	1	0.159856	0.155188
X305.17818107843129	Negative	0.932848	0.729596	0.177633	0.0349943	0.988622	0.484364	0.115141	0.744296	0.227973	0.819543
X306.91783520424991	Negative	0.258948	0.0514577	0.0194721	0.00142747	0.810109	0.468223	0.0351059	0.967053	0.183287	0.420982
X308.91563941328218	Negative	0.287575	0.0577019	0.0280889	0.00221958	0.808117	0.554652	0.0514497	0.989023	0.26036	0.464956
X311.16711949546391	Negative	0.933498	0.841187	0.773236	0.017258	0.999004	0.994385	0.056842	0.999897	0.0834052	0.103269
X311.16738918795818	Negative	0.385788	0.103297	0.139595	0.00303269	0.874543	0.941733	0.0509154	0.999573	0.209921	0.157237
X312.1702978100252	Negative	0.359033	0.0882102	0.103065	0.00219768	0.855648	0.89643	0.0389487	0.999971	0.174935	0.150677
X313.16629039082648	Negative	0.300353	0.0716664	0.0682565	0.0013943	0.857378	0.843528	0.0287696	1	0.130432	0.136721
X314.16757904484712	Negative	0.488431	0.0929346	0.162267	0.003715	0.743971	0.911029	0.0463158	0.995242	0.281284	0.166971
X314.1684495317466	Negative	0.35819	0.107415	0.0447301	0.00267729	0.906807	0.627679	0.0487055	0.976808	0.178186	0.383268
X318.87525855566702	Negative	0.998592	0.0948022	0.37396	0.0444958	0.142674	0.510968	0.0677771	0.861755	0.986552	0.606088
X321.1721306168065	Negative	0.674562	0.249803	0.502453	0.0091736	0.900528	0.997704	0.0719729	0.977361	0.260443	0.115165
X321.17326529878602	Negative	0.378156	0.185952	0.276676	0.0201411	0.982271	0.999088	0.338897	0.998293	0.610115	0.454198
X321.23481772160977	Negative	0.283097	0.195164	0.0826645	0.00202496	0.998648	0.910321	0.0472524	0.975723	0.0716364	0.170655
X322.17654594050458	Negative	0.436913	0.193028	0.228968	0.0175459	0.967818	0.985228	0.256496	0.999943	0.545036	0.47948
X322.91236526243767	Negative	0.0882587	0.296996	0.0193452	0.00769087	0.912539	0.857701	0.533326	0.414224	0.184192	0.970129
X323.16696340501028	Negative	0.484122	0.118706	0.14885	0.00252173	0.829272	0.893063	0.0306125	0.999858	0.151949	0.121226
X323.1700588894667	Negative	0.155979	0.0524225	0.0381067	0.0017269	0.947934	0.882202	0.0759638	0.999529	0.220209	0.291494
X325.18322549947942	Negative	0.189244	0.0551651	0.0516865	0.00306808	0.919596	0.905587	0.116764	0.999999	0.365743	0.385107
X325.18333152380973	Negative	0.834293	0.644804	0.833543	0.0190021	0.995829	1	0.0939751	0.995901	0.161019	0.0942097
X325.1829349198166	Negative	0.404777	0.13785	0.18599	0.00479947	0.92812	0.974449	0.0786897	0.999536	0.251384	0.188618
X326.18650871369903	Negative	0.21077	0.0597154	0.0582789	0.00435795	0.911572	0.906201	0.150606	1	0.460878	0.469066
X326.1860598084512	Negative	0.376941	0.114933	0.146454	0.00376087	0.908026	0.954359	0.0663315	0.999815	0.235202	0.18702
X327.18203088218291	Negative	0.389522	0.115801	0.134016	0.00326839	0.900325	0.931943	0.0546028	0.999976	0.203326	0.176798
X327.18211261756801	Negative	0.198076	0.0547403	0.0494194	0.00328161	0.907361	0.883146	0.119562	0.999995	0.390103	0.421996
X328.1838571327101	Negative	0.29276	0.0769552	0.0517788	0.00370626	0.884208	0.766039	0.0885355	0.998877	0.329757	0.45001
X328.18339380729458	Negative	0.427227	0.101772	0.109608	0.00214397	0.833277	0.855114	0.0302982	0.999998	0.148554	0.138169
X328.87909107236749	Negative	0.848511	0.344621	0.0750233	0.00878383	0.86373	0.320613	0.0407377	0.822705	0.177471	0.642978
X330.69887836177242	Negative	0.941087	0.514843	0.367845	0.0183975	0.896969	0.765072	0.0581096	0.99813	0.218032	0.323418
X332.69570442070022	Negative	0.967751	0.609088	0.457857	0.0279281	0.914319	0.798466	0.0734568	0.998491	0.251091	0.360714
X334.69312958129558	Negative	0.969468	0.615257	0.448091	0.0271249	0.914757	0.784124	0.0703064	0.99775	0.241027	0.360775
X336.69058756573253	Negative	0.976463	0.565818	0.395786	0.0221857	0.86579	0.704723	0.0537664	0.997191	0.227239	0.349924
X337.18676307976841	Negative	0.215551	0.099785	0.0968849	0.00545954	0.982912	0.980485	0.184624	1	0.373417	0.38239
X337.18376943997168	Negative	0.20647	0.082209	0.0687728	0.00135201	0.968586	0.943163	0.0424544	0.999951	0.110185	0.131154
X339.1987614840221	Negative	0.25808	0.0613953	0.0699134	0.0047474	0.862988	0.896136	0.132457	0.999986	0.482595	0.439027
X339.19859159459509	Negative	0.470013	0.171372	0.246214	0.0124445	0.933557	0.983901	0.170309	0.998884	0.467775	0.34467
X340.20188604636309	Negative	0.293488	0.0630389	0.0787071	0.00560114	0.828033	0.889101	0.136074	0.999885	0.534976	0.457922
X340.201641622267	Negative	0.434172	0.148502	0.179016	0.00780842	0.925289	0.958513	0.119155	0.999928	0.363587	0.30891
X340.85756638826592	Negative	0.999993	0.274578	0.263297	0.049138	0.248835	0.238405	0.0439056	1	0.773488	0.789346
X341.19764072025578	Negative	0.410865	0.12123	0.139574	0.00554675	0.895226	0.926866	0.0899305	0.999979	0.32183	0.28437
X341.19657291563988	Negative	0.282751	0.0506104	0.0547927	0.00333322	0.771998	0.797953	0.0821993	0.999998	0.419857	0.395036
X342.19931536602769	Negative	0.190651	0.0646161	0.0746024	0.00324566	0.947128	0.967272	0.123012	0.99998	0.338223	0.299831
X342.89462351926232	Negative	0.996919	0.851172	0.986503	0.0340822	0.959796	0.999832	0.0570761	0.984853	0.156647	0.0729061
X353.21286360911711	Negative	0.594529	0.102982	0.148081	0.00602541	0.675256	0.804332	0.0577486	0.999099	0.395304	0.290748
X354.07047135199571	Negative	0.92035	0.316774	0.480867	0.0102797	0.740267	0.899809	0.0357916	0.996368	0.22631	0.137103
X354.84870961993198	Negative	0.433742	0.0885706	0.0336239	0.00161579	0.782693	0.440731	0.0215641	0.967372	0.125015	0.303884
X355.19846790857571	Negative	0.411504	0.195871	0.48411	0.0167293	0.977782	0.99989	0.263581	0.950836	0.522251	0.216532
X356.84546152567958	Negative	0.53578	0.131967	0.115333	0.00304034	0.817645	0.772931	0.0324765	0.999982	0.166601	0.189716
X362.83948421519892	Negative	0.957557	0.400345	0.390412	0.00379527	0.765755	0.754803	0.0102063	1	0.0620374	0.0640709
X364.8772590519315	Negative	0.288747	0.0539066	0.0277829	0.00175394	0.784761	0.549013	0.0392213	0.99195	0.218187	0.38343
X367.22664615495478	Negative	0.416055	0.0845328	0.0687852	0.00501878	0.785302	0.714251	0.0796256	0.999913	0.397181	0.46414
X374.9056173270219	Negative	0.262664	0.0534469	0.0169668	0.00152642	0.816832	0.417279	0.0373168	0.941377	0.1901	0.493002
X380.85066899222619	Negative	0.806999	0.27468	0.64148	0.0281487	0.826109	0.99771	0.150295	0.940772	0.574622	0.233675
X381.23644831980403	Negative	0.4186	0.189555	0.364326	0.0194785	0.972009	0.999953	0.295264	0.987086	0.590267	0.342543
X381.23730539244127	Negative	0.448434	0.427142	0.258557	0.00978855	0.999999	0.991223	0.143276	0.994019	0.152481	0.266926
X384.71698373255771	Negative	0.999998	0.773217	0.643449	0.0116364	0.798776	0.671917	0.012559	0.999174	0.0694182	0.0998325
X386.71436638574647	Negative	0.9766	0.942859	0.751247	0.0308384	0.999797	0.96648	0.0746377	0.988964	0.096277	0.191903
X389.21213775804461	Negative	0.999402	0.650215	0.327362	0.0411094	0.769757	0.427937	0.0576875	0.967321	0.317742	0.637135
X396.86650984018132	Negative	0.446416	0.281323	0.152528	0.0111727	0.995309	0.923435	0.164036	0.991468	0.276229	0.472087
X402.8304466367544	Negative	0.975961	0.642844	0.888081	0.0306372	0.917674	0.996924	0.0746445	0.986501	0.251139	0.123753
X403.19283768904961	Negative	0.208201	0.0502546	0.0334386	0.00305465	0.873491	0.748564	0.105026	0.998768	0.392174	0.527261
X403.19526265009449	Negative	0.524681	0.0991114	0.156457	0.00847731	0.730587	0.87712	0.0999108	0.99779	0.527576	0.372629
X404.91564793139747	Negative	0.999842	0.970647	0.995777	0.0392156	0.935516	0.983677	0.0307872	0.999028	0.10017	0.0685863
X406.62796989293832	Negative	0.936691	0.537657	0.398299	0.0300141	0.916906	0.806269	0.097075	0.998654	0.316686	0.440212
X408.62604607765098	Negative	0.832367	0.412749	0.228915	0.0160778	0.929512	0.731141	0.0800207	0.989865	0.253536	0.449819
X421.22537756314858	Negative	0.909307	0.142158	0.116516	0.0238778	0.444251	0.379413	0.0886639	0.999916	0.772386	0.837322
X422.22841513403222	Negative	0.975722	0.134531	0.163877	0.0228431	0.303584	0.360223	0.0557956	0.999914	0.776709	0.705126
X422.83525325164919	Negative	0.40686	0.116788	0.0956627	0.00438017	0.889029	0.833623	0.0709046	0.999919	0.268132	0.319132
X426.96760865691812	Negative	0.258616	0.155582	0.0339514	0.00144443	0.995893	0.668089	0.0356406	0.852118	0.0621082	0.269814
X430.82788370786062	Negative	0.88574	0.151634	0.440601	0.0181766	0.501179	0.907128	0.0746041	0.925722	0.651549	0.262053
X432.86504871596929	Negative	0.366002	0.0673369	0.0322445	0.00242327	0.763736	0.500644	0.0424275	0.988044	0.247717	0.451675
X434.86248530128398	Negative	0.381195	0.092017	0.0269645	0.00274598	0.846513	0.423676	0.0463241	0.926799	0.211478	0.562202
X442.89325718654578	Negative	0.256965	0.0518252	0.0176849	0.00185223	0.815045	0.438837	0.0477479	0.953035	0.239002	0.556192
X444.89034204819092	Negative	0.184819	0.0501344	0.0160626	0.00163933	0.904473	0.529863	0.0597952	0.942799	0.217264	0.541276
X448.839182284137	Negative	0.865554	0.126663	0.0449624	0.0141499	0.463666	0.193247	0.0625893	0.95755	0.627274	0.939319
X452.70585861167342	Negative	0.24176	0.0766836	0.05439	0.00152656	0.931545	0.849849	0.0410046	0.999358	0.135085	0.187064
X453.9254771437827	Negative	0.182745	0.0531521	0.0034986	0.000643186	0.9197	0.139115	0.0200373	0.421114	0.0709137	0.719449
X454.70268171466608	Negative	0.623894	0.127134	0.158474	0.00697201	0.723897	0.80147	0.0621423	0.999869	0.376332	0.311785
X460.8156840372219	Negative	0.964426	0.163474	0.774634	0.0428677	0.389581	0.983873	0.11503	0.665941	0.898685	0.242878
X462.73436559541881	Negative	0.532349	0.139383	0.0983313	0.00224093	0.83767	0.720156	0.0233828	0.999242	0.114024	0.160982
X464.73048335617779	Negative	0.421848	0.156812	0.108283	0.00281367	0.94278	0.85632	0.0417317	0.999011	0.129289	0.186109
X470.82142851134751	Negative	0.367833	0.155363	0.450847	0.00754909	0.966743	0.999771	0.141602	0.924627	0.339974	0.109567
X470.82051625730207	Negative	0.821805	0.267152	0.308643	0.0291528	0.801368	0.851997	0.148492	0.999962	0.598993	0.538199
X472.76379191577809	Negative	0.452531	0.129351	0.0974844	0.00216723	0.880002	0.795719	0.028383	0.999673	0.118565	0.156667
X472.9039373645557	Negative	0.999999	0.92239	0.967016	0.0202531	0.909745	0.959328	0.0190823	0.999722	0.0707433	0.0535585
X480.56182618481171	Negative	0.918232	0.446478	0.381962	0.0149393	0.877216	0.819291	0.0530735	0.999919	0.215955	0.259233
X480.79548881186719	Negative	0.41595	0.0951174	0.0311521	0.001319	0.823203	0.433956	0.0180665	0.946565	0.0926817	0.265342
X482.5589431562629	Negative	0.978679	0.647974	0.433141	0.0307058	0.914504	0.737961	0.0726765	0.994097	0.248526	0.412185
X482.79221387903277	Negative	0.413126	0.0669793	0.0342012	0.000933055	0.708058	0.467781	0.0122199	0.991504	0.0879627	0.168394
X482.7991420598081	Negative	0.897341	0.3965	0.858334	0.0212705	0.860627	0.999975	0.0832554	0.899291	0.337378	0.0967624
X484.5568770594536	Negative	0.955474	0.586243	0.41244	0.0181263	0.920782	0.783485	0.0522602	0.997128	0.179006	0.282102
X490.82334624906332	Negative	0.488334	0.112974	0.0575417	0.00493149	0.809909	0.570184	0.0628839	0.991011	0.307912	0.519264
X492.82073849157331	Negative	0.320639	0.112164	0.0625907	0.00324358	0.942089	0.793049	0.0688626	0.994795	0.207922	0.346962
X500.27681548639453	Negative	0.412128	0.845246	0.797113	0.0312166	0.92042	0.948987	0.438564	0.999971	0.146989	0.170679
X500.85173375777202	Negative	0.369123	0.0879962	0.0559443	0.00356133	0.845165	0.695176	0.0641891	0.998087	0.283569	0.41104
X501.33633361859648	Negative	0.994428	0.458449	0.128526	0.00782151	0.672614	0.225574	0.0140027	0.873699	0.111095	0.409753
X502.63183767431991	Negative	0.747479	0.503987	0.115393	0.0122231	0.991172	0.562888	0.0787141	0.802508	0.152439	0.607743
X502.85019013548072	Negative	0.4005	0.0630761	0.0348464	0.00252495	0.700989	0.487877	0.0396052	0.994709	0.273121	0.441226
X504.78035461502691	Negative	0.933903	0.55822	0.931332	0.0274314	0.931367	1	0.0901917	0.933937	0.27937	0.091431
X512.87595343267287	Negative	0.207841	0.173902	0.222876	0.00560582	0.999936	0.999998	0.196629	0.999756	0.234252	0.183121
X514.65920908494945	Negative	0.13589	0.0559459	0.0713133	0.0015168	0.974943	0.992154	0.0756575	0.999838	0.180981	0.143857
X520.69387706065163	Negative	0.279787	0.0926543	0.0701956	0.0031295	0.936077	0.874067	0.0776922	0.999716	0.2393	0.305273
X520.90992529815344	Negative	0.107389	0.0509739	0.0034519	0.00105091	0.987106	0.230256	0.062954	0.429821	0.131804	0.901553
X521.91441459316297	Negative	0.0880806	0.0569562	0.00855309	0.00132892	0.99835	0.573849	0.100924	0.732249	0.154143	0.688373
X522.69036598913135	Negative	0.400995	0.118772	0.147078	0.00271268	0.897702	0.942582	0.0428257	0.999887	0.163971	0.132695
X522.79187092894244	Negative	0.803137	0.32013	0.752947	0.0125258	0.879807	0.999975	0.0682933	0.915311	0.26795	0.079429
X522.79255861503157	Negative	0.712004	0.0627548	0.193554	0.0111466	0.389432	0.791989	0.079242	0.93948	0.791948	0.389393
X530.72235061499021	Negative	0.589333	0.161748	0.0844302	0.00209333	0.837126	0.606933	0.0185215	0.991565	0.0907457	0.173246
X532.72038704578085	Negative	0.465826	0.100637	0.0766975	0.00133721	0.79334	0.699011	0.0157871	0.999736	0.0889651	0.1165
X538.80740810072052	Negative	0.738514	0.432206	0.236304	0.0226714	0.978274	0.836593	0.148725	0.988429	0.324034	0.557946
X540.75293293579261	Negative	0.759049	0.13858	0.1076	0.00307148	0.619503	0.525162	0.0176816	0.999784	0.160481	0.204667
X542.7492384142796	Negative	0.473309	0.113948	0.0748439	0.00192112	0.826162	0.682187	0.0232996	0.998511	0.117979	0.177282
X544.77138329366221	Negative	0.800205	0.352615	0.266344	0.00693023	0.90989	0.82186	0.0373006	0.999438	0.136648	0.18716
X548.78157856786822	Negative	0.556799	0.111537	0.0775712	0.00353323	0.741267	0.608532	0.0361043	0.999159	0.227494	0.313667
X550.77914014315184	Negative	0.274801	0.0578652	0.0367172	0.000947135	0.825249	0.671217	0.020308	0.998104	0.103395	0.16018
X554.49515944667121	Negative	0.977384	0.622242	0.484924	0.0306517	0.902054	0.7948	0.0735778	0.999013	0.264013	0.364518
X556.49213863049636	Negative	0.968183	0.605797	0.429783	0.0272251	0.911588	0.769224	0.071353	0.997143	0.247449	0.378387
X558.48882531565903	Negative	0.954232	0.498337	0.360173	0.0191954	0.864069	0.727616	0.0558517	0.998446	0.236472	0.342405
X560.48714041343851	Negative	0.965706	0.795983	0.536142	0.035994	0.987609	0.870059	0.0960088	0.988231	0.195466	0.368634
X560.59125273950633	Negative	0.971688	0.778488	0.50139	0.0332653	0.979812	0.827338	0.0844021	0.985315	0.19099	0.374554
X560.80947441989827	Negative	0.346315	0.0674177	0.0315149	0.00246544	0.786882	0.516585	0.0463263	0.986527	0.251699	0.465733
X562.58832770678714	Negative	0.940061	0.800467	0.410439	0.0305713	0.995879	0.812488	0.0970061	0.946457	0.16572	0.433517
X562.76572081954851	Negative	1	0.265057	0.867335	0.04715	0.264708	0.866931	0.0470788	0.745637	0.773265	0.200641
X568.62212467666154	Negative	0.472342	0.143539	0.0348587	0.00585581	0.892224	0.414869	0.0790417	0.881795	0.291346	0.764007
X568.84060136196297	Negative	0.353651	0.0746226	0.0435702	0.00298349	0.811225	0.623871	0.055777	0.996336	0.276915	0.428784
X570.83727499315785	Negative	0.229727	0.0564106	0.0408465	0.00339864	0.875275	0.779301	0.105886	0.999506	0.39263	0.49824
X578.64947768004686	Negative	0.396962	0.102221	0.155923	0.00423025	0.861943	0.954341	0.0705071	0.998363	0.292033	0.197937
X580.64975093172245	Negative	0.202817	0.0929387	0.0878449	0.00219656	0.982479	0.977592	0.0752649	0.999999	0.166368	0.17553
X580.86666032590369	Negative	0.15608	0.0547138	0.00982377	0.00259064	0.954369	0.420458	0.118902	0.794181	0.315959	0.882923
X588.68089588476255	Negative	0.65683	0.183658	0.0761353	0.00452088	0.822335	0.503249	0.0358124	0.973988	0.179958	0.395209
X590.67914524074695	Negative	0.283614	0.0623148	0.0417982	0.00143775	0.836474	0.704614	0.0318769	0.998857	0.154307	0.223386
X598.71132851581513	Negative	0.510202	0.190151	0.121806	0.00529183	0.932595	0.814406	0.0636568	0.997846	0.203135	0.307344
X608.73920660846056	Negative	0.314698	0.0774193	0.0384616	0.00112015	0.863507	0.630163	0.0211141	0.990074	0.0942875	0.184687
X612.76390998820034	Negative	0.422544	0.11704	0.371431	0.00561887	0.87712	0.999964	0.0879025	0.916075	0.335418	0.1035
X620.54699076287443	Negative	1	0.996946	0.492029	0.0390438	0.996511	0.485827	0.0383445	0.676882	0.0652835	0.432659
X626.79672883560306	Negative	0.262043	0.0780803	0.0347232	0.00201018	0.917048	0.670787	0.051232	0.982903	0.17871	0.363171
X628.42840506057337	Negative	0.987062	0.568046	0.507764	0.039269	0.829502	0.775873	0.0831739	0.999962	0.368049	0.41994
X628.79569748954873	Negative	0.506197	0.157731	0.0961765	0.00662872	0.892383	0.73827	0.0816314	0.996992	0.299363	0.449704
X630.42481809160813	Negative	0.957346	0.506598	0.391631	0.0179934	0.864641	0.756675	0.0511952	0.999319	0.218249	0.296866
X632.42089411322695	Negative	0.94198	0.480936	0.365965	0.0176606	0.871209	0.76114	0.0554652	0.999227	0.229447	0.314121
X634.41918260839793	Negative	0.901776	0.525412	0.431603	0.025747	0.942675	0.884742	0.0987229	0.999732	0.286287	0.360258
X636.82915247358824	Negative	0.216679	0.0683994	0.0343912	0.00281141	0.932835	0.743121	0.0919547	0.990742	0.28222	0.485584
X638.8266170379261	Negative	0.203984	0.0682195	0.0436419	0.0024962	0.944021	0.840733	0.0861833	0.998223	0.252131	0.367433
X644.72840250478316	Negative	0.960097	0.272688	0.302737	0.015141	0.59244	0.636938	0.0421101	0.99999	0.368775	0.334067
X645.32327905061311	Negative	0.381551	0.0555406	0.0363597	0.00182275	0.677518	0.524319	0.0292063	0.998564	0.220956	0.319423
X646.71934172404985	Negative	0.97367	0.606029	0.998896	0.0355857	0.900544	0.996848	0.0885535	0.74807	0.311677	0.0528847
X659.34130000516211	Negative	0.368858	0.0893355	0.0866728	0.00315562	0.84979	0.84099	0.0562956	1	0.249305	0.256137
X664.73107787101515	Negative	0.732319	0.164739	0.065106	0.00333958	0.713435	0.383124	0.0209103	0.969559	0.147324	0.344831
X673.35697827537695	Negative	0.509617	0.142578	0.13389	0.00314523	0.862614	0.844244	0.0363089	0.999999	0.159931	0.170118
X676.50911843535368	Negative	0.407327	0.151714	0.0208778	0.00201605	0.944634	0.322746	0.0300996	0.701894	0.0930278	0.530591
X680.75332526905049	Negative	0.419741	0.173496	0.134432	0.0177409	0.960068	0.913108	0.271379	0.999759	0.590503	0.68831
X686.71139186680978	Negative	0.976063	0.393243	0.868391	0.0213881	0.703252	0.994717	0.052036	0.887877	0.341875	0.0938082
X687.37391275281686	Negative	0.43571	0.0809083	0.0796773	0.00574316	0.749906	0.744584	0.086386	1	0.457509	0.462681
X694.78834007787646	Negative	0.353446	0.0753967	0.0368727	0.00234019	0.814679	0.563542	0.0426166	0.98923	0.216032	0.396365
X702.72854689442352	Negative	0.238668	0.214771	0.460776	0.0141726	0.999991	0.983337	0.394036	0.972749	0.43095	0.197682
X706.81489587195483	Negative	0.37966	0.0909659	0.0728396	0.00559848	0.844636	0.774723	0.100352	0.999882	0.410317	0.484122
X710.35073206421612	Negative	0.960635	0.699711	0.400012	0.033739	0.965613	0.757791	0.093673	0.97902	0.23797	0.477388
X715.61579302424366	Negative	0.998197	0.460341	0.294545	0.0183149	0.619115	0.422919	0.0286065	0.995662	0.250331	0.399974
X716.84074497591735	Negative	0.495666	0.380006	0.631924	0.00845211	0.999264	0.999059	0.108037	0.98802	0.152377	0.0742987
X726.68771495872659	Negative	0.998869	0.708582	0.998889	0.0426427	0.839407	1	0.0634969	0.838883	0.285773	0.0633835
X740.46027904393304	Negative	0.141727	0.0563696	0.0160604	0.00135687	0.971141	0.63164	0.0637159	0.920969	0.159262	0.465655
X772.80519372373783	Negative	0.325238	0.0932539	0.0610254	0.00595172	0.900879	0.779167	0.128731	0.998508	0.4229	0.56975
X782.83382699283254	Negative	0.198904	0.0579645	0.0176219	0.00287455	0.918677	0.534989	0.103283	0.933787	0.331407	0.735115
X784.69129470595135	Negative	0.962458	0.310487	0.582124	0.00789616	0.641362	0.907512	0.0211724	0.979911	0.179956	0.0792997
X784.82292922586612	Negative	0.59214	0.301269	0.418444	0.00940278	0.973954	0.997188	0.092348	0.998755	0.219744	0.150405
X792.42715430247756	Negative	0.85403	0.640469	0.248896	0.0229571	0.993026	0.737696	0.105923	0.920072	0.194511	0.541535
X794.42407925669215	Negative	0.998574	0.761178	0.103522	0.00838947	0.886852	0.155589	0.0126292	0.509069	0.0513186	0.508144
X802.42968386222378	Negative	0.0818653	0.395089	0.0506178	0.00527466	0.796579	0.997608	0.424043	0.62754	0.0896832	0.591032
X806.67365787836798	Negative	0.823102	0.606195	0.128889	0.0125636	0.993509	0.520792	0.0642542	0.745729	0.119082	0.576435
X840.78925828525576	Negative	0.32076	0.0715309	0.0180213	0.00290619	0.834432	0.36463	0.0610221	0.893939	0.280195	0.731417
X844.66817690630239	Negative	0.336829	0.411573	0.90568	0.0168609	0.999812	0.788222	0.328953	0.863929	0.265366	0.0635945
X928.15181011595837	Negative	0.995457	0.594535	0.412926	0.0214586	0.795589	0.610124	0.0378953	0.996633	0.205143	0.325388
X928.83505264974769	Negative	0.099489	0.0563887	0.00434397	0.00216379	0.995381	0.306312	0.153358	0.479077	0.259094	0.986094
X929.847117575521	Negative	0.0925014	0.0837319	0.00803849	0.0045976	0.999995	0.532819	0.34269	0.568989	0.371731	0.994761
X930.15210091012204	Negative	0.99988	0.732553	0.59312	0.0406421	0.807781	0.675376	0.0509526	0.998995	0.258396	0.357917
X962.82780233599703	Negative	0.0731142	0.0595201	0.0045623	0.00272274	0.999916	0.410926	0.258159	0.478628	0.308344	0.995658
X963.33337914756021	Negative	0.0762622	0.0535731	0.00288863	0.00284708	0.999285	0.263406	0.259741	0.354992	0.350425	1
X966.30420956361684	Negative	0.401151	0.451207	0.038841	0.00990336	0.999972	0.524925	0.166705	0.470914	0.143779	0.893658
X972.29487302090604	Negative	0.217508	0.142721	0.072229	0.00133296	0.998148	0.94182	0.0394335	0.990289	0.0619645	0.123088
X974.29458449925687	Negative	0.618007	0.744541	0.218064	0.00993704	0.999297	0.901329	0.0911073	0.80398	0.064217	0.318382
X997.84047319382353	Negative	0.177605	0.130558	0.00882367	0.00967124	0.999495	0.345716	0.373213	0.444902	0.476712	0.999996
X999.27497485524782	Negative	0.786577	0.592926	0.195095	0.0195681	0.996132	0.720935	0.112381	0.888737	0.189085	0.580616
X150.88558499471949	Negative	0.187079	0.438677	0.993521	0.279061	0.962987	0.324922	0.00729095	0.65969	0.0194117	0.158104
X168.04193987196791	Negative	0.637207	0.321445	0.0268043	0.0868419	0.968921	0.225972	0.569599	0.49167	0.886994	0.936655
X259.02180173958908	Negative	0.999436	0.889766	0.0104343	0.0971516	0.954858	0.0144443	0.134358	0.0416644	0.349734	0.612587
X446.670177783177	Negative	0.879577	0.999996	0.926988	0.101341	0.902499	0.464019	0.0241353	0.907225	0.0923342	0.31508
X962.31195697561805	Positive	0.131929	0.00855023	0.00203409	4.22937e-05	0.430703	0.108421	0.000898297	0.848937	0.011083	0.0517532
X960.31434396395127	Positive	0.105454	0.00639899	0.00334929	6.87323e-05	0.407507	0.227301	0.00204971	0.990333	0.0306493	0.0614669
X956.32127784589352	Positive	0.115231	0.00729622	0.00349619	9.14097e-05	0.422408	0.218446	0.00273311	0.984722	0.0403386	0.0883802
X954.32317986688213	Positive	0.167836	0.0112304	0.00508628	0.000139513	0.440168	0.220796	0.00328004	0.981419	0.0466879	0.10642
X868.7116034647255	Positive	0.300964	0.0376211	0.0112709	0.000245461	0.641444	0.259896	0.00363257	0.929265	0.0294823	0.099218
X792.47158108016981	Positive	0.130366	0.009979	0.00462888	7.05171e-05	0.48831	0.255687	0.00174741	0.983075	0.020042	0.0449361
X790.69439069405189	Positive	0.275824	0.0310037	0.0138378	0.000287009	0.608043	0.33878	0.00482533	0.982683	0.0439154	0.0986919
X788.43895406820957	Positive	0.171261	0.00767352	0.00425887	9.75509e-05	0.316555	0.181739	0.00204952	0.993526	0.0419824	0.0783775
X786.43900045453768	Positive	0.147858	0.00602433	0.00439084	7.65342e-05	0.291093	0.216095	0.00172882	0.999407	0.0382167	0.0535938
X784.44194793093038	Positive	0.164615	0.00571151	0.00431641	7.54926e-05	0.251138	0.191532	0.00153893	0.99963	0.0396451	0.0535147
X782.44473946641688	Positive	0.127748	0.00527762	0.00336361	6.51628e-05	0.294056	0.190649	0.00160842	0.997532	0.03477	0.0565797
X780.44769590391866	Positive	0.153058	0.00524108	0.00385728	6.27255e-05	0.247944	0.183772	0.00130089	0.99946	0.0331142	0.0460698
X778.45080896470108	Positive	0.166094	0.00565602	0.00515346	7.30095e-05	0.246763	0.225856	0.00146314	0.999995	0.0381538	0.0421348
X732.7341121752122	Positive	0.221053	0.0249218	0.00776357	0.000103329	0.619442	0.252088	0.00172524	0.934054	0.0137605	0.0450048
X730.73735986268139	Positive	0.331357	0.0365428	0.00981706	0.00012421	0.588897	0.206348	0.0014387	0.905687	0.0121818	0.0456551
X726.48356616573949	Positive	0.149638	0.00994986	0.0037289	0.000130295	0.439031	0.181568	0.00336129	0.958549	0.0481245	0.134289
X724.48591746469742	Positive	0.129798	0.00789611	0.00305892	8.61481e-05	0.409658	0.170385	0.00226779	0.961744	0.0341047	0.0938954
X722.70705398142127	Positive	0.212563	0.0250543	0.0106101	0.00015918	0.637155	0.34458	0.00306524	0.977666	0.0247824	0.0593274
X720.49198873403202	Positive	0.116978	0.00858896	0.00237294	0.000110977	0.473442	0.144509	0.00346064	0.893138	0.0447944	0.174144
X662.75099966401797	Positive	0.195962	0.0205939	0.00675328	0.000133455	0.597608	0.248936	0.00266746	0.942107	0.0236928	0.0744739
X654.71842894979522	Positive	0.22183	0.0203538	0.00667431	8.36117e-05	0.544232	0.21798	0.00132238	0.942012	0.0124966	0.0389763
X586.73059630071691	Positive	0.223514	0.0292967	0.00593534	0.000238453	0.674026	0.19313	0.0048017	0.82444	0.0364387	0.181708
X548.83029418847445	Positive	0.384451	0.0455006	0.0170452	0.000287063	0.60144	0.289071	0.00333158	0.965629	0.0299331	0.0800865
X430.9147324888811	Positive	0.0719462	0.0269065	0.000538096	0.000118684	0.965779	0.0420409	0.00597955	0.111679	0.0154505	0.706694
X410.85774853750053	Positive	0.300807	0.0470452	0.0116086	0.00023212	0.72203	0.267029	0.00339685	0.886953	0.0219296	0.0895544
X402.82603747961969	Positive	0.275829	0.0257251	0.0104121	0.000174183	0.540441	0.264521	0.0026264	0.973145	0.0272708	0.0683489
X400.82906232262451	Positive	0.278524	0.0343102	0.0113834	0.000209527	0.640913	0.283667	0.00325652	0.947231	0.0262089	0.0798521
X394.79406036445448	Positive	0.172753	0.0283927	0.00516318	0.000131771	0.761566	0.217867	0.00296821	0.78765	0.0169121	0.0969605
X392.79710728074451	Positive	0.245002	0.0297557	0.00580534	0.000103777	0.642383	0.171762	0.00156888	0.812446	0.0116379	0.0615017
X390.80059358682138	Positive	0.260952	0.0294869	0.013218	0.000225471	0.612952	0.343477	0.00381456	0.982945	0.0336146	0.0755675
X354.89644284791291	Positive	0.30027	0.0402239	0.0180722	0.000279786	0.666749	0.388887	0.0042665	0.983536	0.0327388	0.0730472
X352.89888189407162	Positive	0.258312	0.0346225	0.0100643	0.00025701	0.67566	0.273934	0.00452452	0.922642	0.0340294	0.117957
X259.11601311776758	Positive	0.115778	0.0134432	0.00527395	1.34535e-05	0.642041	0.32015	0.000231323	0.966797	0.00133187	0.00316136
X227.95608568292539	Positive	0.033179	0.0480601	0.00282095	0.000232775	0.999151	0.499236	0.031162	0.379114	0.0215499	0.357268
X218.92076638169601	Positive	0.244231	0.0298068	0.010649	0.000215948	0.644306	0.304037	0.00387738	0.958023	0.0313993	0.0889313
X216.92358951603291	Positive	0.262046	0.0400923	0.00911919	0.000240545	0.722176	0.246907	0.00411022	0.86375	0.0269432	0.119683
X208.89189631565989	Positive	0.207598	0.0224267	0.00682406	0.000234727	0.605979	0.237712	0.00508128	0.928556	0.0466799	0.155157
X206.8949426341556	Positive	0.247583	0.0306914	0.00571191	0.000286662	0.64937	0.167144	0.00540811	0.797217	0.0442932	0.235105
X169.1030470071656	Positive	0.0599604	0.0284493	0.000859612	0.000100662	0.987493	0.0891065	0.00570919	0.182541	0.0116583	0.423552
X168.09963186376311	Positive	0.0428678	0.035208	0.000775612	0.00013418	0.999931	0.109687	0.0115782	0.132699	0.0140289	0.606443
X102.1284792068534	Positive	0.066185	0.0244266	0.0219921	0.000263293	0.964144	0.949236	0.0184274	0.999994	0.0498358	0.0553867
X98.512834478833142	Positive	0.300706	0.148497	0.0115713	0.000994708	0.985271	0.266352	0.0193851	0.494038	0.0421606	0.455917
X968.67599950342878	Positive	0.215154	0.445089	0.0411802	0.000721412	0.977624	0.805377	0.0193006	0.497238	0.0082323	0.104709
X966.7872217084365	Positive	0.228166	0.0754165	0.00876132	0.000485997	0.940185	0.272965	0.0112352	0.640084	0.0353127	0.286069
X946.72855667815043	Positive	0.547181	0.102728	0.0361918	0.000804851	0.721212	0.361199	0.00703897	0.957361	0.0479391	0.134893
X945.57897070294075	Positive	0.525041	0.768452	0.278055	0.00561526	0.991087	0.982361	0.0649993	0.864114	0.0329015	0.144891
X944.73229879294684	Positive	0.372925	0.0713003	0.0162076	0.000555776	0.775098	0.285974	0.0075614	0.867527	0.04416	0.188774
X936.69607859919824	Positive	0.368346	0.0781565	0.0186567	0.000578894	0.809955	0.326774	0.00805302	0.880589	0.0423359	0.173242
X924.64944003920402	Positive	0.450912	0.693293	0.13613	0.00383618	0.991058	0.894305	0.0536081	0.681057	0.0271174	0.204678
X901.55265527069992	Positive	0.331639	0.697837	0.182746	0.00231522	0.95164	0.991338	0.0455267	0.784735	0.0154256	0.0892223
X880.62293099550243	Positive	0.390414	0.649272	0.181888	0.00541672	0.987207	0.976666	0.0936192	0.825472	0.0443804	0.217059
X87.100452437815989	Positive	0.513583	0.111899	0.0282053	0.000687268	0.78344	0.318249	0.00642357	0.893164	0.0362642	0.142629
X857.52533601328844	Positive	0.356368	0.669022	0.16166	0.00285155	0.973134	0.975615	0.0525613	0.767847	0.0209871	0.127133
X84.045335227344268	Positive	0.938132	0.93685	0.851608	0.000354147	1	0.999109	0.000912572	0.999174	0.00091811	0.00125385
X818.78422796084953	Positive	0.308246	0.0591454	0.0127606	0.000449252	0.789924	0.283254	0.00732932	0.852089	0.0408493	0.185042
X810.75203691637432	Positive	0.315448	0.0939601	0.0162314	0.000321078	0.910822	0.3401	0.0047703	0.78448	0.0167673	0.0970545
X81.52160766572122	Positive	0.618234	0.191411	0.0419321	0.00046479	0.865569	0.347165	0.00312909	0.849144	0.0128374	0.0601317
X808.75525276602093	Positive	0.432098	0.0861928	0.0241863	0.000233744	0.775268	0.341962	0.00227591	0.918182	0.0121641	0.0430218
X800.72284966129837	Positive	0.457968	0.0698054	0.0238857	0.000513401	0.673346	0.317101	0.00533696	0.953742	0.0408789	0.118523
X752.79367805301706	Positive	0.389655	0.067865	0.021918	0.000529643	0.73931	0.352149	0.00677438	0.944639	0.0437174	0.133754
X750.79561685366389	Positive	0.399637	0.0735176	0.0186906	0.000431902	0.755774	0.300009	0.00516387	0.896155	0.0312422	0.122096
X742.76428713573705	Positive	0.340205	0.0547534	0.0126762	0.000221837	0.723408	0.253915	0.00281181	0.871282	0.0177804	0.0771781
X740.76749594331898	Positive	0.334208	0.0568184	0.0224364	0.000302873	0.743868	0.416874	0.00416864	0.972008	0.0257109	0.0651366
X74.097649840610416	Positive	0.572565	0.204147	0.0263232	0.000905752	0.913003	0.260344	0.00753186	0.671306	0.0268297	0.207744
X684.80545701249707	Positive	0.363573	0.0523183	0.0143043	0.000354123	0.677877	0.263322	0.00456432	0.911889	0.0341414	0.124388
X682.8077019211056	Positive	0.384132	0.0805916	0.0198361	0.000599489	0.803008	0.329192	0.00797654	0.888321	0.0428517	0.170205
X68.994450791443199	Positive	0.266267	0.206753	0.0697226	0.000712187	0.999705	0.886843	0.0150093	0.945202	0.0198456	0.0612085
X674.77618884082847	Positive	0.30735	0.0591663	0.0108135	0.000214404	0.79116	0.244873	0.00301476	0.800852	0.0157513	0.0867328
X672.7786238469148	Positive	0.309821	0.0658981	0.0151984	0.000300269	0.822143	0.327627	0.00448921	0.871189	0.0219327	0.09518
X664.7474956578817	Positive	0.295575	0.0599904	0.0150652	0.000411942	0.810252	0.340462	0.00692376	0.892674	0.0360955	0.142272
X654.85857292009598	Positive	0.97262	0.874482	0.630842	0.00978451	0.996417	0.917689	0.0242508	0.987823	0.041422	0.0866235
X638.60848937788114	Positive	0.863199	0.0680871	0.0443974	0.000527908	0.282259	0.19255	0.00187275	0.998501	0.0433966	0.0665607
X637.13394237099283	Positive	0.86952	0.983868	0.774451	0.00186855	0.991111	0.999548	0.00725984	0.964364	0.00383722	0.00982545
X636.14521754677878	Positive	0.98684	0.999374	0.956403	0.00389998	0.998693	0.999632	0.0079342	0.989425	0.00536312	0.0105859
X635.14194769991627	Positive	0.863337	0.971765	0.853889	0.002521	0.995464	1	0.010257	0.99433	0.00594909	0.0106035
X616.81785585627222	Positive	0.468151	0.0849783	0.0287476	0.000360049	0.733169	0.360208	0.0034269	0.951879	0.0214524	0.0634604
X616.161256961699	Positive	0.985996	0.9976	0.993819	0.00429481	0.999695	0.999976	0.00887777	0.999985	0.00675772	0.00768448
X615.15931758282693	Positive	0.949659	0.990426	0.980629	0.00170814	0.998776	0.999787	0.00461559	0.999979	0.00317479	0.00362716
X614.81996700303944	Positive	0.447947	0.0890883	0.0238856	0.000641814	0.770251	0.325181	0.00712529	0.908313	0.0420981	0.154392
X614.48423259688832	Positive	0.61661	0.380878	0.0809172	0.00151885	0.990525	0.564171	0.0120221	0.807707	0.0237747	0.127499
X614.16287865488857	Positive	0.966042	0.994604	0.991258	0.00223175	0.999001	0.999605	0.00548459	0.999998	0.00383074	0.00412818
X613.15988463898157	Positive	0.994877	0.999864	0.999773	0.00790177	0.999277	0.999502	0.0139696	1	0.00988532	0.0101975
X606.78898478066378	Positive	0.427701	0.0625559	0.0211251	0.000259846	0.666947	0.308914	0.00261072	0.951712	0.0191575	0.0566878
X604.79119368733166	Positive	0.324706	0.0522018	0.0115084	0.000180391	0.726518	0.244531	0.0023062	0.857383	0.0141868	0.0646574
X586.87196940012529	Positive	0.97941	0.93809	0.643009	0.0101133	0.999544	0.909779	0.0233934	0.964214	0.032063	0.0866951
X581.40585330660076	Positive	0.429784	0.618717	0.0956565	0.00156587	0.99629	0.811643	0.0210614	0.623723	0.0123702	0.111907
X559.39285899757704	Positive	0.306152	0.559702	0.0780314	0.00101546	0.983562	0.874324	0.0194471	0.607764	0.00887761	0.0834591
X546.833165092939	Positive	0.427408	0.0650384	0.0218359	0.000492264	0.681401	0.31791	0.00554602	0.950842	0.0416485	0.122951
X544.34027375701135	Positive	0.163702	0.957312	0.710593	0.00516893	0.406534	0.732774	0.229668	0.971912	0.0141368	0.0356069
X538.12827155597381	Positive	0.838451	0.966034	0.79275	0.000335605	0.994187	0.999977	0.00122917	0.986804	0.000737196	0.00139625
X536.80488058281139	Positive	0.361491	0.0744506	0.0243253	0.000467068	0.801924	0.412051	0.00638678	0.946546	0.0340382	0.103766
X524.80802808055296	Positive	0.239018	0.228393	0.0237526	0.000713489	1	0.570222	0.0169685	0.588641	0.0178412	0.175262
X518.88410272814735	Positive	0.964972	0.970678	0.579309	0.00734733	1	0.901279	0.0192656	0.889753	0.0183606	0.074152
X502.2937410368653	Positive	0.427807	0.946886	0.305455	0.00189678	0.816763	0.998593	0.0263425	0.67328	0.00524426	0.0401285
X485.38740671170518	Positive	0.740158	0.574092	0.0805328	0.0049599	0.998002	0.443409	0.0313166	0.604838	0.0496626	0.408478
X485.12008901683947	Positive	0.872563	0.984533	0.890344	0.000625821	0.991231	0.999999	0.00218637	0.994207	0.00121017	0.00205393
X484.11740686889539	Positive	0.820832	0.938336	0.843783	0.000704133	0.997647	0.999998	0.00292927	0.998811	0.00190599	0.00273156
X473.10391411544089	Positive	0.556629	0.351017	0.0122157	0.00186	0.993396	0.132169	0.0177467	0.237298	0.0331714	0.694774
X471.10575940746247	Positive	0.526406	0.213552	0.0269718	0.00140141	0.946575	0.297198	0.0140177	0.662245	0.042649	0.318711
X468.44150607580542	Positive	0.469426	0.253947	0.0330627	0.000525212	0.986469	0.401023	0.00530758	0.665989	0.0109805	0.0885753
X467.35872830393561	Positive	0.884027	0.746677	0.18681	0.00549321	0.998118	0.582776	0.0217984	0.746001	0.0342694	0.214352
X460.2734997332725	Positive	0.237489	0.174892	0.0667786	0.00090755	0.999429	0.907118	0.0227654	0.965016	0.0317789	0.0853932
X454.37465581551101	Positive	0.776342	0.492953	0.145607	0.00241836	0.984033	0.619572	0.0129566	0.881013	0.0284778	0.118491
X453.92541002751773	Positive	0.464319	0.165044	0.170437	0.000676272	0.929215	0.935579	0.00722549	1	0.0237259	0.0229319
X453.17010911757308	Positive	0.999984	0.983691	0.629645	0.0108838	0.991852	0.679184	0.0124264	0.889034	0.0239339	0.0968436
X450.89684733090638	Positive	0.997897	0.922438	0.971667	0.0100715	0.984793	0.997908	0.015884	0.999523	0.0346833	0.0252064
X441.3613332092209	Positive	0.589569	0.375912	0.0265662	0.00117272	0.993172	0.251862	0.00965428	0.424556	0.017945	0.270555
X440.35900281592171	Positive	0.810828	0.573935	0.0607489	0.00401032	0.991374	0.298287	0.0201574	0.503523	0.039514	0.425815
X437.3444947634714	Positive	0.708702	0.888988	0.221475	0.00448972	0.995074	0.840302	0.0307797	0.643246	0.0172585	0.14741
X437.19496399676058	Positive	0.999802	0.999084	0.751626	0.0157939	0.99999	0.83382	0.0203365	0.868009	0.0229396	0.100674
X427.13890042958951	Positive	0.954995	0.913175	0.217538	0.000821763	0.999865	0.514269	0.00205127	0.597601	0.00252388	0.0222881
X426.83110570767587	Positive	0.497878	0.555657	0.00651038	0.00298409	0.999967	0.0820324	0.035443	0.069742	0.0300957	0.980535
X426.14071815209508	Positive	0.951281	0.99998	0.486674	0.00128482	0.970285	0.860216	0.0033764	0.53707	0.00145486	0.0142001
X425.36596870719978	Positive	0.66041	0.528868	0.137306	0.000778466	0.999211	0.716793	0.00505001	0.835951	0.00711493	0.034129
X425.13777947342618	Positive	0.996325	0.998912	0.830327	0.0032456	0.971601	0.953018	0.00534605	0.699013	0.00227418	0.015076
X423.33244477962421	Positive	0.680173	0.496113	0.0728704	0.00209407	0.997008	0.466114	0.0144911	0.648253	0.0240237	0.19891
X420.88635931398341	Positive	0.35838	0.0600075	0.0119737	0.000504218	0.733074	0.227671	0.00706574	0.828904	0.0465277	0.224197
X415.21218784949741	Positive	0.165836	0.218122	0.049369	0.000471934	0.999645	0.925731	0.0152077	0.854854	0.0113798	0.052074
X415.04363137850657	Positive	0.322124	0.125728	0.00791097	0.000559886	0.959256	0.173027	0.00906542	0.420724	0.0250187	0.361736
X412.85496301319682	Positive	0.390261	0.0816904	0.0210662	0.000559729	0.800933	0.340335	0.00721655	0.899548	0.0388343	0.148365
X410.16661220584422	Positive	0.84146	0.999857	0.678449	0.00120642	0.902795	0.997477	0.00496258	0.761304	0.0014779	0.00788253
X409.16338183005348	Positive	0.882786	0.999979	0.785055	0.00205216	0.916454	0.99943	0.00764909	0.830727	0.00233637	0.010554
X409.08516723783708	Positive	0.746446	0.895743	0.787891	0.000352872	0.997204	0.999989	0.00166559	0.999069	0.00108045	0.00149559
X404.8491007457157	Positive	0.944719	0.996984	0.176602	0.00292625	0.993792	0.459339	0.00841285	0.280152	0.00468625	0.119311
X388.18541461556441	Positive	0.377804	0.786867	0.219885	0.0016737	0.935429	0.993134	0.0268374	0.765813	0.00839675	0.0506637
X387.18239837045678	Positive	0.336378	0.830428	0.245996	0.00129614	0.872374	0.999189	0.0230958	0.761131	0.0055593	0.0332685
X382.90932505770019	Positive	0.999194	0.974273	0.984586	0.0114171	0.99623	0.998561	0.0163231	0.99999	0.0279725	0.0248327
X380.31286837555177	Positive	0.654159	0.421844	0.0369255	0.002305	0.991949	0.287544	0.0172911	0.484453	0.03342	0.390734
X379.30635214008652	Positive	0.726466	0.551913	0.0945648	0.00388489	0.9976	0.512009	0.0250457	0.686426	0.0405838	0.288847
X372.34828083972292	Positive	0.8865	0.551346	0.188115	0.00162437	0.962996	0.581896	0.00586023	0.906445	0.0154631	0.0580555
X361.27237402972082	Positive	0.221452	0.495505	0.0741645	0.000833596	0.964914	0.942963	0.0222319	0.655346	0.00843211	0.0695312
X360.97871796414319	Positive	0.306159	0.146855	0.00998345	0.000360412	0.98285	0.22843	0.00566798	0.446633	0.0123472	0.180481
X358.26494772009272	Positive	0.488508	0.302217	0.0471443	0.00162093	0.993892	0.499299	0.0183983	0.720824	0.0339669	0.226991
X356.07789499284428	Positive	0.892488	0.986767	0.880326	0.000950735	0.993297	1	0.00320817	0.991104	0.00182288	0.00335536
X355.07504200676192	Positive	0.895627	0.958013	0.89438	0.000729789	0.999451	1	0.00237984	0.999416	0.00177424	0.00239104
X341.33177215399411	Positive	0.91865	0.999941	0.816224	0.00923342	0.952335	0.998928	0.0322919	0.870381	0.0110799	0.0478457
X336.28462839321242	Positive	0.737706	0.473162	0.104239	0.00328544	0.987793	0.535685	0.0202298	0.79789	0.0423515	0.225423
X326.37954487061842	Positive	0.902901	0.455422	0.573021	0.00247907	0.900996	0.961853	0.00864783	0.999414	0.0327023	0.0233714
X326.05797030189382	Positive	0.981909	0.992519	0.896035	0.00435939	0.999957	0.996059	0.00951152	0.988814	0.00804568	0.016251
X317.19469500127002	Positive	0.43654	0.172848	0.0469197	0.00127143	0.952025	0.552451	0.0162583	0.905741	0.0479063	0.17624
X315.17894609738647	Positive	0.685285	0.739517	0.0855782	0.00697574	0.999974	0.51706	0.0525233	0.464406	0.0450604	0.508279
X314.92192426511377	Positive	0.9998	0.999998	0.97952	0.0140285	0.999956	0.994619	0.0180596	0.985783	0.015187	0.0326683
X308.09084020520203	Positive	0.696878	0.842968	0.65187	0.000220565	0.998281	0.999989	0.00110843	0.995526	0.000764249	0.00123263
X307.58584959179188	Positive	0.877923	0.974492	0.531319	0.00138128	0.996292	0.96008	0.005077	0.844536	0.00308319	0.0136034
X307.08441061844059	Positive	0.896255	0.961044	0.752223	0.00259441	0.999311	0.997507	0.00933329	0.980696	0.00667149	0.0150058
X306.87200298688941	Positive	0.599355	0.609427	0.0474705	0.00503133	1	0.399128	0.0470371	0.390648	0.0457538	0.596019
X301.14299467170781	Positive	0.0688673	0.0703764	0.00165626	0.000158511	1	0.16367	0.0091314	0.160342	0.00894186	0.381445
X298.57108831764401	Positive	0.842886	0.94272	0.750663	0.000476437	0.998447	0.999677	0.00178362	0.988914	0.0012265	0.00230537
X290.05859619264601	Positive	0.848004	0.988836	0.617099	0.00118853	0.981085	0.991095	0.00477961	0.859851	0.00223365	0.00911274
X284.89036390816682	Positive	0.628197	0.543786	0.0204009	0.00243772	0.999864	0.179731	0.019736	0.222548	0.0248722	0.615989
X283.17579420204692	Positive	0.674056	0.675395	0.215507	0.00113034	1	0.859088	0.00741359	0.858068	0.00738747	0.0328548
X280.26481828348273	Positive	0.812108	0.856308	0.525128	0.00673028	0.999977	0.982591	0.0348259	0.968055	0.0299819	0.078622
X275.5682925577841	Positive	0.886584	0.965191	0.706701	0.000626687	0.998564	0.995207	0.00208519	0.963637	0.00143889	0.0035119
X272.21797503344948	Positive	0.823673	0.443841	0.427946	0.00115042	0.951092	0.943245	0.00498219	1	0.0141787	0.0148759
X271.23898799277441	Positive	0.858082	0.63072	0.151907	0.000538116	0.991163	0.538941	0.00194423	0.780959	0.00358378	0.0195845
X269.56851164394112	Positive	0.999322	0.999984	0.998023	0.0200904	0.999902	0.999993	0.028443	0.999495	0.0229752	0.0317473
X259.15307371307802	Positive	0.456533	0.176473	0.0234619	0.000784428	0.94597	0.31349	0.00877661	0.686471	0.0264323	0.197181
X257.07810408766107	Positive	0.756434	0.832441	0.796892	0.00146487	0.999854	0.99999	0.00791381	0.999992	0.00631455	0.00704232
X250.17882661681571	Positive	0.469964	0.830781	0.326108	0.00460005	0.95905	0.997829	0.0616005	0.862007	0.02188	0.0982037
X246.93433129812971	Positive	0.998065	0.995371	0.917173	0.0175981	0.999992	0.982113	0.0277016	0.98981	0.0311002	0.0629854
X244.89725494184901	Positive	0.420541	0.243412	0.00911045	0.00114229	0.992053	0.144872	0.0150939	0.26552	0.0290475	0.600231
X243.12174360897251	Positive	0.867202	0.442698	0.159415	0.00274999	0.923652	0.545141	0.0111079	0.934519	0.0381427	0.124063
X243.04457920620041	Positive	0.834311	0.951903	0.842034	0.000399373	0.996842	1	0.00150694	0.997419	0.000967225	0.00147284
X239.1499302558656	Positive	0.203461	0.262414	0.0195417	0.000508052	0.999701	0.563595	0.0134127	0.464331	0.0101742	0.14221
X235.02114589817941	Positive	0.927001	0.986441	0.974808	0.00247132	0.99788	0.99948	0.00772673	0.999982	0.00496529	0.00566756
X231.04435403843141	Positive	0.75011	0.876433	0.834566	0.00096669	0.998685	0.99978	0.00508157	0.999976	0.00346445	0.00398002
X229.14180411049779	Positive	0.375288	0.321535	0.00960136	0.000520345	0.999939	0.175216	0.0069422	0.208871	0.00832539	0.283644
X217.10557968994391	Positive	0.841813	0.194444	0.199558	0.00111882	0.655432	0.665687	0.00456483	1	0.0363266	0.035315
X217.1055069006151	Positive	0.446112	0.702525	0.014115	0.0052096	0.988908	0.205079	0.0755311	0.103248	0.03673	0.958696
X216.92412442275781	Positive	0.387235	0.146769	0.0557975	0.000835109	0.949518	0.672375	0.0116517	0.965713	0.034638	0.0924476
X213.14812859492071	Positive	0.635109	0.976339	0.13454	0.00566746	0.912351	0.733729	0.0484179	0.30197	0.0132874	0.299619
X199.18166032665209	Positive	0.593635	0.0853318	0.00742441	0.000336204	0.606539	0.0720816	0.00229528	0.532343	0.0195809	0.220693
X195.12407638971879	Positive	0.532837	0.533884	0.021817	0.000656909	1	0.243048	0.00579124	0.242412	0.00577519	0.172802
X181.13967152075509	Positive	0.37678	0.0562673	0.0273978	0.000372892	0.687958	0.433572	0.0046552	0.989036	0.0339108	0.0696172
X180.1364264883683	Positive	0.399333	0.0614906	0.0291247	0.000469357	0.693203	0.429354	0.00570176	0.987384	0.0415088	0.0874122
X177.95853012962129	Positive	0.797401	0.894005	0.0305379	0.00647717	0.999377	0.16705	0.0350407	0.120479	0.0249008	0.839565
X177.03337913875541	Positive	0.87442	0.987402	0.866808	0.000924184	0.98938	1	0.00332254	0.987692	0.00175425	0.00341123
X173.17450848079261	Positive	0.248081	0.336345	0.00914826	0.000241902	0.99927	0.261574	0.00438422	0.189737	0.00315984	0.120162
X172.17271900552041	Positive	0.218954	0.374154	0.0068693	0.000162554	0.993439	0.226966	0.00305399	0.126122	0.00174372	0.0956407
X171.16976697604201	Positive	0.224114	0.381389	0.00625606	0.0001374	0.993501	0.202724	0.00242298	0.111955	0.00139669	0.083961
X158.15476671412111	Positive	0.438584	0.335478	0.0768206	0.00231938	0.999379	0.728716	0.0319515	0.839606	0.0449844	0.21044
X156.9646130468231	Positive	0.994136	0.990316	0.964907	0.00486103	0.999997	0.999041	0.00865919	0.999651	0.0094117	0.0125339
X151.13861545055909	Positive	0.123798	0.0753471	0.00363518	0.000244283	0.997127	0.212296	0.00899217	0.329813	0.0147071	0.299151
X146.9813849212488	Positive	0.269023	0.125266	0.0230458	0.000652433	0.981679	0.511573	0.0133621	0.803603	0.0302966	0.162795
X144.9830722470044	Positive	0.214797	0.123427	0.0279522	0.000659094	0.994848	0.672903	0.0173439	0.865112	0.0311474	0.137006
X144.17532091568231	Positive	0.424866	0.136409	0.0135547	0.00054748	0.912927	0.209638	0.00632974	0.583222	0.0223712	0.219242
X142.94890854534879	Positive	0.614458	0.270561	0.0738293	0.00147538	0.950032	0.533196	0.0117038	0.896313	0.0346823	0.134946
X141.9594090150739	Positive	0.348705	0.0786369	0.0370986	0.000488885	0.83261	0.571762	0.00703432	0.987053	0.0341059	0.0723431
X136.93173074001291	Positive	0.571404	0.734872	0.00641389	0.00185856	0.99813	0.0657338	0.0170285	0.0417963	0.0109309	0.900404
X135.1073898310344	Positive	0.10524	0.0811594	0.00101986	8.86662e-05	0.999776	0.0620334	0.00285791	0.0806532	0.00363554	0.311516
X133.08676120304469	Positive	0.365328	0.285625	0.0596817	0.00109645	0.999646	0.72278	0.0171978	0.821036	0.0230695	0.118772
X132.0563847811672	Positive	0.128274	0.106756	0.00594789	0.00033135	0.99994	0.32605	0.0127542	0.379975	0.0153511	0.267123
X130.0505769047638	Positive	0.774288	0.857425	0.654568	0.000244914	0.999751	0.99939	0.00103177	0.994062	0.000821835	0.00137987
X125.987039478402	Positive	0.799385	0.618846	0.0478864	0.00167723	0.99692	0.250444	0.00810885	0.385456	0.0133544	0.231827
X124.9384623116398	Positive	0.99767	0.929375	0.992908	0.0059327	0.987951	0.999968	0.00937251	0.995254	0.0192861	0.0109565
X124.0876903434749	Positive	0.936418	0.359814	0.176276	0.00145771	0.764751	0.474895	0.00419467	0.982661	0.0243524	0.0549735
X122.09396852130141	Positive	0.176374	0.207261	0.00977635	0.000519424	0.999957	0.378763	0.016036	0.328866	0.0135089	0.278582
X117.1045845413506	Positive	0.241888	0.094868	0.01936	0.000394972	0.96494	0.492538	0.00819743	0.837016	0.021587	0.105654
X108.0562624150383	Positive	0.297399	0.365901	0.0183881	0.000879583	0.999816	0.397721	0.0169909	0.325065	0.0132762	0.277686
X105.9546096323018	Positive	0.208286	0.0992882	0.0212357	0.000551114	0.985303	0.584661	0.0144407	0.850542	0.0312513	0.144559
X105.0706404579504	Positive	0.631326	0.988619	0.703437	0.00524793	0.87134	0.999927	0.0450727	0.918328	0.010494	0.0369242
X104.0611817606914	Positive	0.226675	0.180841	0.0168663	0.000916534	0.999829	0.469699	0.0242559	0.555906	0.0310224	0.31196
X103.95636667892801	Positive	0.224033	0.102999	0.020127	0.000424334	0.982103	0.536298	0.00971422	0.8237	0.0217373	0.111108
X103.04001923094179	Positive	0.255079	0.327554	0.0097415	0.000284991	0.999664	0.26936	0.00520209	0.207477	0.00396308	0.138824
X178.9462746577087	Positive	0.999992	0.999727	0.999227	0.0628464	0.998955	0.999823	0.0703045	0.992979	0.0476158	0.0899495
X99.51322468555108	Positive	0.116123	0.0424089	0.00776602	0.000443498	0.9618	0.440965	0.0203337	0.797404	0.0560599	0.288781
X964.7876494488396	Positive	0.218532	0.0341974	0.0073103	0.00061185	0.737912	0.241095	0.015561	0.843656	0.103137	0.420231
X958.31797932359996	Positive	0.164039	0.00922615	0.00455955	0.000141652	0.383952	0.202909	0.00341872	0.987576	0.0584187	0.121727
X935.80851221568582	Positive	0.180541	0.0463415	0.00636962	0.00061828	0.891996	0.254901	0.0193478	0.695829	0.0774385	0.472092
X91.505529335156922	Positive	0.127	0.049199	0.0156083	0.000649911	0.968687	0.662681	0.0297279	0.941041	0.0775416	0.23293
X901.81511893082302	Positive	0.135002	0.0256867	0.00390774	0.000301572	0.813414	0.210116	0.0107588	0.71978	0.0565558	0.352239
X89.060821941563049	Positive	0.215618	0.0164348	0.00971569	0.00100352	0.47955	0.315504	0.0285385	0.996343	0.348485	0.521361
X88.106812676321709	Positive	0.0703161	0.00927569	0.0147582	0.00048836	0.687159	0.844973	0.0381242	0.997709	0.273239	0.177631
X858.68157870156824	Positive	0.399492	0.0470372	0.0235137	0.000456742	0.595591	0.36328	0.00551872	0.990428	0.0524557	0.104382
X828.81194631566484	Positive	0.246938	0.0446351	0.00892582	0.000704472	0.781793	0.256947	0.0161187	0.826657	0.0940632	0.408787
X760.82480855090114	Positive	0.273657	0.0432442	0.0149603	0.00082117	0.731222	0.363999	0.0172364	0.954652	0.116284	0.309438
X728.48033158904946	Positive	0.118028	0.00894622	0.00425828	0.000140484	0.48474	0.258623	0.00464707	0.984805	0.0596319	0.129268
X722.48924212608586	Positive	0.151821	0.0107835	0.00447437	0.000163524	0.461446	0.214626	0.00441977	0.972458	0.0605241	0.149925
X692.83654929111981	Positive	0.277604	0.035935	0.014959	0.000523418	0.659149	0.359173	0.00990561	0.97681	0.0812364	0.190025
X668.52441533116598	Positive	0.162229	0.0143417	0.00413494	0.000288511	0.538383	0.186136	0.00844831	0.911912	0.0958557	0.319502
X666.52726898006154	Positive	0.158499	0.0129139	0.00410191	0.000296246	0.509276	0.188909	0.0089415	0.931769	0.110101	0.331121
X664.53003883394865	Positive	0.158762	0.0121296	0.00349137	0.000271086	0.486444	0.160112	0.0079884	0.909198	0.104704	0.347638
X662.53397611992489	Positive	0.158964	0.0129038	0.00483728	0.000331552	0.507915	0.221581	0.0102597	0.96038	0.126901	0.322478
X626.84670478471776	Positive	0.227296	0.0320563	0.0111853	0.000466709	0.699741	0.339076	0.0107399	0.954864	0.0789399	0.218872
X624.84881805208511	Positive	0.265635	0.0402294	0.00838469	0.000480371	0.717889	0.225218	0.00938209	0.838156	0.0653021	0.293801
X610.56572096311072	Positive	0.126179	0.0116365	0.00431812	0.000210289	0.556001	0.246612	0.00729379	0.958193	0.0784585	0.213079
X608.5684309899749	Positive	0.153009	0.0112647	0.00391794	0.000289757	0.47382	0.18674	0.00901436	0.947473	0.122686	0.336867
X606.5712909153624	Positive	0.142512	0.0105926	0.00288472	0.000228573	0.477638	0.14618	0.00718481	0.893065	0.0963111	0.343394
X604.57422149189131	Positive	0.129066	0.0117745	0.00370995	0.000267983	0.551932	0.208272	0.00969921	0.929078	0.106296	0.325201
X558.85888607632921	Positive	0.193464	0.0444385	0.00886454	0.00047584	0.862055	0.321716	0.0130636	0.825826	0.0584424	0.276716
X556.86128537018192	Positive	0.327387	0.0489264	0.0128793	0.000624529	0.700059	0.268302	0.0101298	0.902955	0.0742853	0.265328
X550.61004911646262	Positive	0.180632	0.0118246	0.00552735	0.000306107	0.431862	0.22282	0.00814749	0.98418	0.12525	0.261476
X548.61263749754301	Positive	0.246414	0.0149667	0.0106937	0.000601618	0.400078	0.302571	0.0133692	0.99936	0.222296	0.300618
X546.61559757699365	Positive	0.186816	0.0123236	0.00764681	0.000394186	0.433862	0.291664	0.0107566	0.997376	0.163934	0.257355
X515.28847655065601	Positive	0.262789	0.046319	0.325793	0.00882427	0.770621	0.999814	0.238838	0.682528	0.811669	0.189943
X492.65113746766639	Positive	0.194725	0.0107557	0.00558596	0.000330899	0.376354	0.209134	0.008301	0.990846	0.151428	0.282563
X490.65367133139432	Positive	0.15994	0.00943311	0.00365602	0.000173717	0.399166	0.16664	0.00453272	0.963046	0.0753809	0.19866
X488.65688776584028	Positive	0.140392	0.0104621	0.00466214	0.000217029	0.47862	0.240438	0.0068304	0.979717	0.0911428	0.205369
X434.69234284057558	Positive	0.182272	0.015647	0.00463647	0.00049972	0.525722	0.185958	0.0147729	0.91923	0.172589	0.497709
X432.69524431422832	Positive	0.178055	0.0168545	0.00521456	0.000642214	0.561643	0.213603	0.0205618	0.92922	0.214272	0.562882
X430.69820033489839	Positive	0.179278	0.0186505	0.00538686	0.000493706	0.596137	0.218961	0.0148119	0.915564	0.143775	0.438624
X428.70094587498647	Positive	0.276721	0.0208442	0.00825628	0.000864785	0.465698	0.212704	0.0180948	0.969993	0.244153	0.518521
X422.88391475510338	Positive	0.348133	0.0465335	0.0159811	0.000566735	0.654915	0.303885	0.00839921	0.953758	0.0693317	0.195593
X382.86689294537001	Positive	0.420039	0.0476739	0.239244	0.0064053	0.576685	0.991214	0.101537	0.814214	0.687779	0.193978
X382.76807772221719	Positive	0.227333	0.0227868	0.00509124	0.000262468	0.575375	0.162962	0.00530958	0.8505	0.0532236	0.23665
X374.73694664910812	Positive	0.218267	0.0126593	0.00709281	0.000484239	0.389156	0.234653	0.0117337	0.99445	0.203321	0.342895
X372.73921466523223	Positive	0.178483	0.011278	0.00412363	0.000225945	0.420374	0.168798	0.00565085	0.955707	0.0890229	0.24282
X333.18857529600672	Positive	0.317011	0.0236786	0.03498	0.00186095	0.455167	0.5924	0.0375677	0.998948	0.455749	0.336302
X317.21640680422632	Positive	0.0415036	0.0453882	0.0132388	0.000822081	0.999997	0.941385	0.121161	0.924916	0.111087	0.343515
X261.13126901252588	Positive	0.623291	0.038734	0.0182394	0.000866881	0.321568	0.163702	0.00627654	0.98682	0.137679	0.275488
X258.81918207643258	Positive	0.194629	0.012664	0.00568162	0.000376952	0.428564	0.212702	0.00975277	0.980974	0.151296	0.320531
X256.82184985094148	Positive	0.170394	0.0142201	0.00483785	0.000387406	0.516841	0.207248	0.011588	0.945641	0.139698	0.378974
X254.8249944745653	Positive	0.182972	0.014421	0.00570914	0.000444407	0.495246	0.226987	0.0127416	0.968298	0.162534	0.378072
X245.1009309681998	Positive	0.475717	0.0238295	0.263095	0.00510795	0.30274	0.987847	0.0677335	0.532428	0.838567	0.139822
X239.14975952015169	Positive	0.342494	0.00945808	0.00551576	0.000199789	0.19193	0.11201	0.00246119	0.995573	0.0905865	0.156727
X195.1239309592425	Positive	0.159779	0.0459506	0.013114	0.00213762	0.919249	0.511801	0.0940706	0.920498	0.305385	0.724805
X193.16807868619071	Positive	0.0589351	0.0032967	0.00476108	0.000363006	0.369476	0.497748	0.0312824	0.998867	0.486109	0.35962
X192.1650980974909	Positive	0.0636687	0.00368199	0.00617482	0.000560191	0.382349	0.56847	0.0499701	0.99591	0.638141	0.442554
X188.14035260212529	Positive	0.46021	0.0153083	0.037553	0.0117681	0.212729	0.450602	0.165865	0.974813	0.999759	0.937768
X164.93081558029499	Positive	0.476784	0.0498912	0.0330981	0.00145384	0.531183	0.394652	0.0168207	0.998732	0.192339	0.27763
X147.14359336369091	Positive	0.0517741	0.00300722	0.013773	0.000433553	0.377972	0.905682	0.0446296	0.832808	0.602268	0.164967
X134.1119585080809	Positive	0.0603232	0.00393161	0.0129292	0.000444089	0.4212	0.85031	0.0394705	0.922623	0.508168	0.18029
X131.16308750940601	Positive	0.407916	0.0451299	0.0174591	0.00254043	0.570762	0.276424	0.038936	0.969465	0.363365	0.689914
X131.16298870625829	Positive	0.362432	0.0438395	0.00893767	0.000547208	0.614998	0.170271	0.0076818	0.832446	0.0704577	0.318495
X128.14414480289591	Positive	0.368883	0.0186144	0.00590089	0.000559178	0.325659	0.109816	0.00771646	0.934989	0.166785	0.457693
X124.0878619437202	Positive	0.167654	0.0194243	0.00607687	0.000735257	0.63726	0.26157	0.0258199	0.932802	0.218415	0.563634
X111.0114429202666	Positive	0.951488	0.0163866	0.158981	0.0365543	0.0484617	0.409269	0.10788	0.595009	0.983256	0.866135
X102.1284474565259	Positive	0.291127	0.0457699	0.0653224	0.00100576	0.725893	0.841372	0.0203926	0.999272	0.139038	0.0984313
X100.1131924604546	Positive	0.363701	0.0321888	0.0211515	0.0005133	0.502781	0.366967	0.00709183	0.998589	0.0884236	0.133356
X84.012401396049057	Positive	0.968619	0.0283714	0.103264	0.0783918	0.0740676	0.254121	0.197529	0.913192	0.961552	0.999719
X73.532787680243644	Positive	0.980205	0.0419636	0.142932	0.12829	0.09725	0.30724	0.279107	0.924631	0.945041	0.999992
X110.009490580076	Positive	0.998635	0.0398505	0.272604	0.207272	0.0605266	0.385294	0.299676	0.703969	0.807964	0.999591
X998.78160230376091	Positive	0.312502	0.0512925	0.0129779	0.00150359	0.736417	0.283491	0.0299454	0.893756	0.194321	0.583822
X994.5949767103657	Positive	0.942273	0.869913	0.676259	0.0288094	0.999448	0.972052	0.0903414	0.994552	0.124903	0.218923
X984.79860521418061	Positive	0.733217	0.776767	0.140842	0.0188443	0.999987	0.653055	0.126208	0.606394	0.111483	0.692786
X98.985173711827613	Positive	0.418693	0.0692665	0.0108252	0.00245144	0.713787	0.172433	0.0361593	0.748807	0.244341	0.838863
X98.985077689152249	Positive	0.33277	0.0667456	0.0329201	0.00385985	0.799358	0.549355	0.0795221	0.98974	0.383526	0.625248
X98.962578988351524	Positive	0.227727	0.0813346	0.0605187	0.00157086	0.952827	0.89519	0.045312	0.999642	0.131682	0.174613
X977.60245877524267	Positive	0.230157	0.319272	0.0813156	0.0203967	0.999083	0.951001	0.53042	0.872122	0.404047	0.892955
X975.82124025310429	Positive	0.624874	0.402287	0.0511862	0.0212225	0.992752	0.400782	0.188083	0.623102	0.331599	0.976888
X975.3210804480276	Positive	0.472972	0.198414	0.0154423	0.0127803	0.957696	0.207168	0.173291	0.489048	0.424849	0.999935
X974.81533542531133	Positive	0.19451	0.104413	0.00317961	0.00311934	0.992399	0.117848	0.115466	0.217892	0.213777	1
X973.63062228712738	Positive	0.240484	0.529084	0.130677	0.00467453	0.964414	0.992268	0.140746	0.820303	0.0528449	0.257505
X972.61316091865456	Positive	0.962123	0.835724	0.881527	0.0342547	0.99494	0.998615	0.0940331	0.999964	0.165553	0.141306
X97.969690780275982	Positive	0.954729	0.271334	0.115574	0.0382176	0.604277	0.307665	0.110299	0.973079	0.690937	0.947383
X97.969549945363411	Positive	0.445619	0.141609	0.144455	0.00154901	0.907493	0.912056	0.0198242	1	0.0742538	0.0727333
X969.80209670381157	Positive	0.303952	0.0891949	0.0141985	0.00267226	0.908919	0.315153	0.0592984	0.756644	0.211756	0.782147
X965.78930203904349	Positive	0.242822	0.0520279	0.00712896	0.000712923	0.835589	0.211816	0.0166584	0.69689	0.0820368	0.490952
X964.78575331842444	Positive	0.463532	0.386994	0.0325312	0.0193761	0.999848	0.401431	0.26099	0.47945	0.320257	0.996797
X956.75591459300449	Positive	0.439072	0.0996354	0.0372805	0.0013029	0.815637	0.469556	0.0165931	0.965377	0.0872269	0.223402
X954.75994241141086	Positive	0.398118	0.0790859	0.0156355	0.00075033	0.782056	0.257712	0.00993243	0.827435	0.0574392	0.271333
X949.55194417219968	Positive	0.295693	0.382131	0.139324	0.0254575	0.999563	0.981739	0.508138	0.943437	0.404481	0.800244
X941.82836515316706	Positive	0.528303	0.468306	0.0467767	0.0110315	0.999958	0.457844	0.128975	0.517293	0.152254	0.875114
X941.32829739030001	Positive	0.438406	0.215909	0.0127102	0.00932187	0.979796	0.189897	0.140559	0.39407	0.303951	0.999524
X940.82286972763904	Positive	0.426265	0.366313	0.0293161	0.0168573	0.999932	0.404347	0.25478	0.467693	0.301583	0.995834
X930.606415161933	Positive	0.260107	0.664765	0.318892	0.0135103	0.916611	0.999851	0.350836	0.958106	0.109492	0.287636
X907.83582992025674	Positive	0.409509	0.131584	0.0170558	0.0191042	0.915263	0.269613	0.297581	0.681961	0.722909	0.999992
X907.33473834882113	Positive	0.455311	0.191363	0.0122493	0.0142866	0.959541	0.174781	0.202191	0.4235	0.475403	0.999971
X906.82849849098875	Positive	0.267721	0.126419	0.00388926	0.00331652	0.98287	0.103211	0.0870147	0.222488	0.189841	0.999958
X906.66791914767134	Positive	0.777513	0.722979	0.405815	0.0114766	0.99997	0.955039	0.067567	0.974583	0.0791597	0.189438
X906.5299784863214	Positive	0.252324	0.391956	0.151841	0.0238653	0.996612	0.995959	0.549944	0.952611	0.37488	0.748801
X90.97753175853191	Positive	0.487261	0.401861	0.0540894	0.00593692	0.999787	0.549034	0.0767865	0.643733	0.0993232	0.612688
X90.97733800815368	Positive	0.479497	0.297403	0.02681	0.00311265	0.994167	0.33111	0.039172	0.523987	0.0719559	0.61451
X90.50776333725949	Positive	0.185191	0.059959	0.0232841	0.00174135	0.93984	0.664971	0.0639174	0.970194	0.196489	0.436443
X898.79935502490309	Positive	0.309673	0.106726	0.0151751	0.0018954	0.940486	0.32736	0.039447	0.716705	0.12406	0.622091
X896.80054316302676	Positive	0.330813	0.052048	0.0149583	0.00115933	0.717554	0.302613	0.0207051	0.922484	0.144323	0.429046
X890.65298402036308	Positive	0.898903	0.716404	0.658351	0.0161089	0.994404	0.986327	0.0625452	0.999968	0.113327	0.132498
X89.507659266266543	Positive	0.386947	0.0990828	0.0344461	0.00109625	0.862206	0.499156	0.0160064	0.955576	0.0718013	0.199728
X89.109846950663268	Positive	0.691014	0.12623	0.0410197	0.00165181	0.654918	0.288331	0.0108189	0.944058	0.0899114	0.261768
X888.76937683469293	Positive	0.387615	0.0759276	0.0284506	0.000941602	0.779829	0.434142	0.0133858	0.965986	0.0784847	0.201816
X886.77192509422912	Positive	0.412368	0.0658299	0.0220141	0.000802763	0.702725	0.332872	0.0102825	0.950233	0.074877	0.214464
X884.68660493080142	Positive	0.746847	0.693204	0.482537	0.0123446	0.999975	0.987862	0.0796536	0.994915	0.0925867	0.163233
X88.106767314931403	Positive	0.828182	0.187571	0.0817744	0.00207889	0.658064	0.364318	0.00937402	0.978718	0.0769926	0.17726
X878.73957375692032	Positive	0.479025	0.0860233	0.0208217	0.000736847	0.726268	0.267165	0.00765666	0.884102	0.0516151	0.205406
X876.74310763300889	Positive	0.397876	0.0583183	0.0285536	0.000879748	0.675787	0.4245	0.0119689	0.98935	0.0941148	0.186661
X873.34071863764461	Positive	0.409815	0.220449	0.0122069	0.00929695	0.988009	0.198481	0.15265	0.374639	0.297389	0.999714
X872.83549570965783	Positive	0.324864	0.132037	0.00308885	0.00645512	0.964567	0.0642617	0.139987	0.16926	0.341582	0.984228
X868.67102217670617	Positive	0.927503	0.728747	0.683664	0.0208128	0.990058	0.981615	0.0708572	0.999988	0.140702	0.158722
X86.097427342234198	Positive	0.479956	0.116474	0.0404129	0.00410054	0.827062	0.45551	0.0528488	0.9547	0.252525	0.574518
X84.960583604221398	Positive	0.990916	0.74936	0.202597	0.0196561	0.93552	0.365685	0.0388828	0.773182	0.125715	0.567396
X839.8461295873069	Positive	0.224548	0.0683917	0.00463983	0.00283403	0.925267	0.150253	0.089223	0.438216	0.284406	0.996385
X838.8406501469218	Positive	0.222086	0.11384	0.00580403	0.00494791	0.989604	0.190187	0.162254	0.353087	0.3068	0.999961
X836.59744619876528	Positive	0.387457	0.629972	0.169767	0.00769323	0.989743	0.970026	0.135503	0.819104	0.0677442	0.31975
X830.80953210622329	Positive	0.353335	0.0958748	0.0109257	0.00134188	0.883307	0.21243	0.0226402	0.634825	0.0937737	0.600251
X830.67300847503941	Positive	0.845054	0.862206	0.098414	0.0295802	0.999999	0.403649	0.139704	0.384858	0.131723	0.931463
X820.78194235398951	Positive	0.461181	0.114584	0.0264196	0.000968156	0.83857	0.342036	0.0110451	0.870483	0.0534596	0.222512
X82.94605799260151	Positive	0.300031	0.141234	0.0233251	0.0165069	0.981503	0.472027	0.361876	0.766792	0.643131	0.999324
X804.84744972484464	Positive	0.631907	0.443599	0.0408552	0.0322212	0.996455	0.329572	0.269472	0.496071	0.417273	0.999854
X80.948830894674643	Positive	0.563067	0.208051	0.0292497	0.0263923	0.922778	0.29183	0.26701	0.701868	0.664742	0.999995
X797.53592991734718	Positive	0.322563	0.573934	0.248642	0.0271164	0.985223	0.999614	0.494234	0.952336	0.266326	0.602355
X796.54351866145942	Positive	0.427559	0.405422	0.151866	0.0296912	0.999999	0.933681	0.407061	0.945807	0.429249	0.820185
X792.57137595399456	Positive	0.594502	0.784047	0.228204	0.0144277	0.99645	0.925821	0.140745	0.782376	0.0835925	0.4153
X790.83491221750307	Positive	0.968881	0.896818	0.314661	0.0289567	0.998709	0.628006	0.0754167	0.773881	0.113099	0.527635
X79.022329549339375	Positive	0.889327	0.102589	0.0345626	0.0184723	0.366258	0.138305	0.0747349	0.950793	0.797931	0.993376
X786.70930464249545	Positive	0.671528	0.540729	0.381264	0.00551729	0.999234	0.980471	0.0425669	0.99764	0.0610457	0.0983171
X78.99986156090597	Positive	0.211697	0.0759757	0.0150543	0.00146922	0.954591	0.456314	0.0454803	0.828013	0.130645	0.520015
X771.85728122606474	Positive	0.267284	0.0809877	0.00448333	0.00293423	0.919992	0.120086	0.0763029	0.373688	0.253569	0.997984
X770.85307919836328	Positive	0.263596	0.139254	0.00664192	0.00501768	0.990451	0.181537	0.137006	0.334553	0.259707	0.99964
X77.99986373780709	Positive	0.708698	0.174693	0.0538424	0.00227664	0.758453	0.347163	0.0146968	0.931718	0.0918566	0.283415
X764.72747885768547	Positive	0.56369	0.560137	0.266629	0.00545531	1	0.966905	0.056581	0.968071	0.0571414	0.147345
X762.8226857757636	Positive	0.26451	0.0526554	0.0183619	0.000994743	0.809709	0.440466	0.0224743	0.956269	0.119968	0.314926
X753.51222512086997	Positive	0.59907	0.417403	0.181525	0.0268187	0.996675	0.864314	0.24819	0.967157	0.385492	0.723504
X752.51714267248667	Positive	0.369029	0.378208	0.131519	0.0225619	1	0.940721	0.380846	0.935248	0.371626	0.780374
X742.7447586554897	Positive	0.833055	0.779802	0.453753	0.0232013	0.999961	0.950906	0.114893	0.97278	0.135347	0.312738
X74.079733003751883	Positive	0.50807	0.101933	0.0547273	0.00122399	0.756788	0.531783	0.012647	0.993461	0.0793188	0.146169
X722.84696486517691	Positive	0.990461	0.954677	0.391227	0.0342515	0.999117	0.629548	0.0684978	0.762538	0.099134	0.492335
X72.938287165700046	Positive	0.495422	0.193862	0.103595	0.0016075	0.943776	0.774594	0.0178679	0.992202	0.0555286	0.106458
X710.3512502613645	Positive	0.999061	0.305846	0.687665	0.0493906	0.415112	0.816308	0.072149	0.940493	0.73218	0.339464
X709.48771970850589	Positive	0.565043	0.421416	0.175778	0.0157709	0.998619	0.879885	0.16568	0.961233	0.243228	0.542397
X708.49065223687126	Positive	0.570693	0.308583	0.101294	0.011124	0.981925	0.692851	0.115972	0.931636	0.250223	0.621136
X705.51965221051546	Positive	0.360945	0.623481	0.218533	0.00661564	0.985321	0.99499	0.126783	0.898403	0.0588754	0.219416
X704.51699998310824	Positive	0.57892	0.788009	0.22864	0.00951644	0.994831	0.934356	0.0968935	0.77908	0.053961	0.293295
X703.86949521542215	Positive	0.524426	0.154854	0.020031	0.0156055	0.874491	0.229887	0.182437	0.679134	0.587074	0.999811
X702.86508119519249	Positive	0.234791	0.126163	0.00785135	0.0046724	0.991831	0.240027	0.144337	0.417074	0.265743	0.996047
X70.013710762687495	Positive	0.9257	0.493549	0.140504	0.0333282	0.902177	0.41493	0.113881	0.870904	0.381886	0.876039
X694.83405538439706	Positive	0.258346	0.0578984	0.00898691	0.000700681	0.846275	0.247136	0.0152281	0.744406	0.072256	0.404524
X69.994611933874921	Positive	0.231937	0.0640955	0.0361453	0.00208168	0.903815	0.734181	0.0611589	0.995374	0.222333	0.362976
X685.39364872342492	Positive	0.47588	0.583036	0.31728	0.0257359	0.999611	0.99678	0.322883	0.981851	0.248796	0.483038
X664.46367163280593	Positive	0.607157	0.28213	0.103497	0.00970981	0.95996	0.664538	0.091629	0.953041	0.24256	0.56215
X660.49023714963607	Positive	0.662289	0.732345	0.200845	0.0144008	0.999931	0.846526	0.117434	0.78627	0.0969691	0.460443
X658.74291983109003	Positive	0.632662	0.481212	0.134915	0.00977284	0.998554	0.737069	0.086093	0.869213	0.130257	0.468821
X658.51098935156676	Positive	0.250217	0.170898	0.209373	0.00541061	0.998632	0.999928	0.156522	0.999892	0.230276	0.188496
X644.7667768567137	Positive	0.790135	0.621577	0.34032	0.0130462	0.997677	0.907176	0.0741112	0.980107	0.118671	0.260477
X641.36614897791605	Positive	0.653821	0.606252	0.267853	0.013547	0.999986	0.929369	0.113055	0.951711	0.128281	0.342146
X635.88174373682523	Positive	0.445121	0.337388	0.0197136	0.0033229	0.99928	0.278074	0.0466458	0.373333	0.0664963	0.750985
X634.87763126315826	Positive	0.135466	0.0776857	0.00341846	0.00159581	0.995498	0.183155	0.0804233	0.303912	0.14008	0.9795
X622.78695051091267	Positive	0.430989	0.456474	0.0167431	0.0153426	0.999998	0.249979	0.230991	0.233285	0.21535	0.999997
X622.78512605499031	Positive	0.914451	0.827552	0.472562	0.028043	0.999422	0.900696	0.101504	0.961532	0.140516	0.349344
X620.43767643739545	Positive	0.574232	0.252912	0.0925213	0.00604804	0.955068	0.655954	0.0613069	0.954707	0.17297	0.430937
X61.060329286006343	Positive	0.413511	0.0621653	0.0352179	0.000824343	0.680797	0.477275	0.010568	0.995517	0.0818118	0.142331
X594.83877361430189	Positive	0.42352	0.478281	0.0459579	0.00862365	0.999965	0.559522	0.135951	0.500845	0.11584	0.806624
X590.75387584610462	Positive	0.622404	0.363725	0.208019	0.00694683	0.986174	0.886051	0.0621593	0.992573	0.132001	0.24124
X585.37514320602281	Positive	0.036663	0.213162	0.0204551	0.00199547	0.770974	0.994974	0.345252	0.561809	0.064016	0.533796
X576.41121233853312	Positive	0.352402	0.367498	0.16869	0.0126016	1	0.980957	0.243076	0.976285	0.232017	0.47782
X572.4380313304664	Positive	0.578356	0.51518	0.0987478	0.00910985	0.999954	0.675866	0.0928151	0.738682	0.110371	0.555603
X570.45858541613632	Positive	0.357599	0.752084	0.166098	0.0108702	0.941605	0.977935	0.208573	0.696165	0.0689024	0.432855
X568.77283263834602	Positive	0.716577	0.82419	0.0339557	0.0368429	0.999494	0.229391	0.246697	0.170255	0.18372	0.999998
X568.77269336104996	Positive	0.679377	0.408206	0.197754	0.00788711	0.985532	0.827726	0.0607181	0.979652	0.130229	0.284443
X567.89407143408152	Positive	0.571304	0.15471	0.0208054	0.020423	0.837912	0.211389	0.207815	0.693263	0.686539	1
X566.8900202503213	Positive	0.105248	0.0532945	0.00239358	0.00140098	0.990807	0.161649	0.0896911	0.299916	0.173845	0.994153
X563.86783246957316	Positive	0.589959	0.0861387	0.32473	0.00164156	0.613701	0.98255	0.0140888	0.881884	0.130729	0.0316313
X556.44238996182526	Positive	0.618298	0.684746	0.248971	0.00684036	0.999948	0.932028	0.0618501	0.892997	0.0515284	0.198379
X546.79032337909962	Positive	0.864385	0.737276	0.533679	0.0152502	0.998787	0.967426	0.0678261	0.995606	0.101267	0.174197
X541.88598762456297	Positive	0.832863	0.142916	0.289875	0.00143364	0.547484	0.819423	0.00615938	0.985474	0.0673036	0.0309731
X532.81688160677777	Positive	0.925711	0.984473	0.343156	0.0389979	0.998241	0.764229	0.13255	0.605067	0.0857754	0.597014
X529.41419666135948	Positive	0.53244	0.652775	0.174777	0.0102335	0.999445	0.900526	0.118324	0.809347	0.0854547	0.396047
X528.41154037554054	Positive	0.436954	0.604512	0.10892	0.00739865	0.997665	0.84477	0.11186	0.686067	0.0697192	0.445892
X526.85063414507295	Positive	0.573487	0.355671	0.162308	0.0215364	0.992102	0.85077	0.216985	0.976263	0.380589	0.687545
X526.85020963435056	Positive	0.551568	0.422575	0.108436	0.00963038	0.999078	0.73629	0.105638	0.856088	0.152103	0.541992
X526.43213550956352	Positive	0.181475	0.308532	0.392963	0.020849	0.994597	0.975624	0.632407	0.999638	0.423918	0.33499
X524.80754785655108	Positive	0.45473	0.379728	0.105672	0.0078203	0.999854	0.819487	0.112293	0.885575	0.141171	0.475651
X524.37104730624105	Positive	0.121863	0.241839	0.257594	0.00978051	0.988176	0.983339	0.505282	0.999999	0.284776	0.267718
X520.34040722579221	Positive	0.181828	0.763235	0.510448	0.0139446	0.718901	0.923145	0.485775	0.989742	0.0859234	0.17012
X518.74349303152087	Positive	0.362785	0.0880686	0.029742	0.000957173	0.851567	0.476668	0.0148086	0.951557	0.0689511	0.197245
X518.32275661094263	Positive	0.176808	0.599406	0.516839	0.0309507	0.856322	0.913128	0.782092	0.99987	0.281108	0.341044
X516.80274379232162	Positive	0.275581	0.239329	0.0146858	0.00210041	0.999969	0.3562	0.0508058	0.40428	0.0596503	0.67649
X516.80130077986041	Positive	0.811583	0.832437	0.0399103	0.0294495	0.999999	0.205373	0.154726	0.192854	0.144972	0.99961
X516.38264310787974	Positive	0.58551	0.382902	0.39773	0.0157857	0.99448	0.996007	0.157214	1	0.27149	0.260206
X515.4252351828676	Positive	0.660013	0.0519886	0.0329844	0.00127347	0.376225	0.257112	0.00879329	0.998104	0.160347	0.243398
X515.36060844283691	Positive	0.433837	0.146662	0.129585	0.00590444	0.922891	0.89452	0.0894357	0.999987	0.287931	0.321126
X511.38554776446313	Positive	0.858151	0.765412	0.369717	0.0317	0.999627	0.877674	0.14278	0.942001	0.189409	0.490384
X509.2876940119404	Positive	0.361365	0.588094	0.283146	0.011324	0.991135	0.999662	0.214169	0.967144	0.112673	0.277747
X506.79699514031847	Positive	0.881732	0.892006	0.779741	0.028445	1	0.999345	0.118033	0.998977	0.113356	0.164435
X502.8264147886531	Positive	0.924226	0.801241	0.447577	0.0345469	0.997875	0.870384	0.11878	0.962857	0.185354	0.435756
X498.9025678926298	Positive	0.268945	0.104516	0.00386965	0.0013228	0.962172	0.102133	0.0307765	0.263475	0.0845787	0.931809
X496.34022786415841	Positive	0.310929	0.331869	0.254351	0.00831503	0.999998	0.999863	0.188903	0.999569	0.175637	0.233627
X493.31412628980922	Positive	0.530384	0.47413	0.294186	0.0121552	0.999968	0.986053	0.141134	0.994276	0.1646	0.284548
X488.87366986867119	Positive	0.591062	0.294505	0.164094	0.0031462	0.971446	0.840203	0.028926	0.992554	0.0736406	0.138954
X486.38224959033982	Positive	0.889811	0.641146	0.362596	0.0180177	0.985716	0.837413	0.0727426	0.98214	0.154488	0.322575
X485.3591477171214	Positive	0.0801179	0.61278	0.411044	0.0411502	0.564341	0.772649	0.991716	0.995039	0.346079	0.534128
X484.55779578210741	Positive	0.996637	0.392256	0.717084	0.0464123	0.570329	0.881154	0.0785156	0.971747	0.599298	0.300932
X484.38488397607591	Positive	0.840721	0.519193	0.0574926	0.00748972	0.9723	0.261126	0.0354359	0.538033	0.0893304	0.679581
X482.40519130322309	Positive	0.10277	0.486936	0.0790887	0.00927126	0.780049	0.99977	0.547532	0.68782	0.121587	0.644034
X478.8452506963306	Positive	0.535674	0.109126	0.0358924	0.000994384	0.753866	0.368191	0.00924676	0.946782	0.0580155	0.172776
X478.3237640670954	Positive	0.954678	0.227148	0.239969	0.00764231	0.531925	0.553823	0.0216454	0.999999	0.241888	0.228982
X471.33254064941173	Positive	0.29084	0.662013	0.327055	0.016906	0.942486	0.999982	0.379805	0.96318	0.137546	0.339519
X468.38776548530922	Positive	0.892395	0.914502	0.558455	0.0172075	0.999996	0.962433	0.0687153	0.948408	0.0623558	0.183077
X465.25960683385262	Positive	0.507056	0.0771536	0.0105873	0.000914988	0.657725	0.131242	0.00909046	0.702714	0.0746642	0.453327
X464.82913767462247	Positive	0.475044	0.400941	0.0636059	0.0131734	0.999875	0.620857	0.177368	0.703474	0.218733	0.840563
X461.28718592833411	Positive	0.147516	0.161893	0.0791795	0.0208581	0.999996	0.992999	0.712057	0.988027	0.676892	0.904478
X459.28063409337938	Positive	0.728425	0.10034	0.376228	0.0235516	0.531313	0.961528	0.158522	0.875115	0.875859	0.38653
X458.86344999456702	Positive	0.464639	0.113776	0.112041	0.0146767	0.83339	0.828682	0.202105	1	0.681088	0.686778
X458.86253674677482	Positive	0.536794	0.553503	0.0160221	0.00980284	1	0.181064	0.111978	0.173334	0.106986	0.997179
X458.35023679601312	Positive	0.54128	0.69441	0.379052	0.00808479	0.998575	0.997465	0.0908954	0.973854	0.0597615	0.146249
X452.94139481287391	Positive	0.803474	0.0859369	0.0417481	0.0211695	0.403575	0.219029	0.115352	0.988768	0.88849	0.991105
X449.34952038977292	Positive	0.133112	0.3659	0.154226	0.00684055	0.944632	0.999974	0.35651	0.966605	0.129027	0.314062
X448.81404748359438	Positive	0.649347	0.381868	0.229225	0.0082757	0.985319	0.894171	0.0693212	0.994379	0.148348	0.258017
X448.81320775602609	Positive	0.678266	0.581398	0.172056	0.00763234	0.999769	0.781389	0.0588519	0.861932	0.0767059	0.313767
X444.3333586491608	Positive	0.288768	0.612545	0.279248	0.0215436	0.961603	1	0.460244	0.956251	0.196769	0.473368
X431.9183818105414	Positive	0.161965	0.0547265	0.00481518	0.00174248	0.948437	0.21668	0.0737643	0.527955	0.213765	0.946043
X426.8316479493057	Positive	0.856527	0.977764	0.175322	0.023391	0.992309	0.595846	0.106949	0.375013	0.0559248	0.687896
X424.35931331770331	Positive	0.977612	0.961365	0.736094	0.0281408	0.999979	0.95946	0.067409	0.976272	0.0778677	0.183601
X421.92718865906602	Positive	0.422303	0.200223	0.275382	0.00197634	0.976833	0.996684	0.028071	0.999264	0.0678018	0.0474687
X417.26133651363222	Positive	0.438412	0.188708	0.0393723	0.00341061	0.96428	0.488814	0.048991	0.835387	0.131019	0.512364
X417.04137334190222	Positive	0.464355	0.0884127	0.0259825	0.00350017	0.750942	0.334766	0.0465945	0.927446	0.27784	0.672777
X405.24592687787953	Positive	0.590396	0.111087	0.116518	0.0364021	0.707184	0.724538	0.329181	1	0.946105	0.937772
X404.84929855050558	Positive	0.556748	0.445678	0.0748424	0.0129024	0.999515	0.595432	0.139428	0.711811	0.188699	0.78321
X404.84875797926168	Positive	0.886383	0.789885	0.540244	0.0193072	0.999432	0.958931	0.079055	0.989952	0.109814	0.213525
X402.29152656899072	Positive	0.559672	0.456243	0.10109	0.00558869	0.999642	0.703049	0.0587031	0.803959	0.0789159	0.376872
X401.28771742611377	Positive	0.6102	0.584157	0.19748	0.0116052	0.999999	0.880196	0.108844	0.897685	0.116694	0.395409
X400.37997817656412	Positive	0.972141	0.286723	0.0601262	0.00238795	0.577348	0.149408	0.00560109	0.821939	0.0560334	0.26977
X396.84137305502531	Positive	0.752588	0.708323	0.102766	0.0333491	0.999988	0.515292	0.205476	0.560387	0.230476	0.944822
X396.33251767595448	Positive	0.851626	0.625586	0.0881987	0.00920938	0.9916	0.363159	0.0423239	0.586827	0.0825782	0.601272
X395.04072440889098	Positive	0.412998	0.562425	0.189482	0.00507381	0.998354	0.973823	0.081326	0.901229	0.0525555	0.195609
X393.32110475684601	Positive	0.798551	0.674837	0.346549	0.00821137	0.999249	0.906304	0.0447948	0.967509	0.0641188	0.165109
X386.83834084495709	Positive	0.748615	0.610578	0.235533	0.0093923	0.99901	0.826792	0.0598718	0.924074	0.087754	0.281775
X385.29282508783763	Positive	0.628396	0.82587	0.539814	0.0141515	0.995326	0.999835	0.126303	0.982318	0.071872	0.159552
X385.17970221528822	Positive	0.998547	0.186096	0.374158	0.0213346	0.272607	0.512385	0.0325717	0.983375	0.630997	0.359146
X384.76700097635558	Positive	0.99741	0.38936	0.0851654	0.0227714	0.554486	0.137669	0.0372324	0.815084	0.363506	0.907778
X376.25961314420817	Positive	0.948457	0.507596	0.275728	0.0262104	0.880971	0.626093	0.0792502	0.985324	0.303519	0.54729
X374.85963101648798	Positive	0.424017	0.395141	0.0117056	0.010534	0.999997	0.183001	0.165329	0.199252	0.180213	0.999993
X374.8593789108462	Positive	0.634006	0.0648992	0.0360799	0.0115086	0.469688	0.295544	0.101265	0.994916	0.791683	0.940746
X373.23062402505798	Positive	0.851745	0.321316	0.0671499	0.00839477	0.836475	0.289	0.0384167	0.814568	0.183832	0.666387
X371.22849228542691	Positive	0.900194	0.137876	0.947598	0.0272941	0.447024	0.999841	0.105253	0.371297	0.825344	0.0829452
X371.1636390590906	Positive	0.990866	0.316888	0.708034	0.0173953	0.532394	0.91228	0.034393	0.937928	0.358467	0.125055
X363.31139038182067	Positive	0.737605	0.914627	0.647779	0.0229378	0.994038	0.999817	0.150772	0.978579	0.0831506	0.190795
X362.92741591106699	Positive	0.293156	0.092636	0.00503987	0.00134158	0.925797	0.122239	0.0283092	0.370557	0.0970259	0.871167
X360.3615243074409	Positive	0.28894	0.480178	0.991617	0.0478462	0.992752	0.488841	0.744385	0.720168	0.512928	0.0931535
X358.98137084503628	Positive	0.951519	0.370029	0.104266	0.00857319	0.745646	0.286445	0.0249073	0.890236	0.159523	0.513475
X357.26182752438842	Positive	0.658044	0.403123	0.0780886	0.00393964	0.988264	0.510992	0.0307639	0.772468	0.0640209	0.344016
X355.94811393713081	Positive	0.823853	0.0759068	0.0866212	0.0198864	0.346878	0.385884	0.101731	0.999985	0.903217	0.870368
X355.18915353501882	Positive	0.949231	0.427116	0.274395	0.0118945	0.811522	0.622254	0.0354453	0.996194	0.184156	0.299198
X349.29581250618071	Positive	0.691583	0.374283	0.107076	0.00568173	0.973011	0.592556	0.041541	0.893331	0.103722	0.364702
X347.18102721023092	Positive	0.61492	0.192024	0.128984	0.0058984	0.868924	0.737722	0.0533899	0.998593	0.223433	0.322126
X342.87051378053559	Positive	0.440925	0.0612912	0.0236241	0.000562035	0.644663	0.327975	0.00622782	0.969354	0.0521257	0.133513
X338.68965039503081	Positive	0.992885	0.170006	0.629926	0.0307323	0.302077	0.846814	0.0583771	0.819602	0.793437	0.259791
X336.69217435690967	Positive	0.99747	0.339119	0.545047	0.0486955	0.492621	0.722052	0.0793386	0.992989	0.683011	0.455544
X335.27998794745218	Positive	0.79365	0.59043	0.140167	0.00725513	0.995294	0.585771	0.0399516	0.789501	0.0709882	0.358813
X334.69497561776939	Positive	0.944364	0.180263	0.30375	0.011397	0.467437	0.676468	0.0349623	0.994979	0.42042	0.260023
X333.96651364055867	Positive	0.924458	0.0553144	0.0557287	0.0290069	0.185534	0.186822	0.10004	1	0.99272	0.992396
X333.33495939694552	Positive	0.651514	0.207431	0.942701	0.00950294	0.864569	0.963789	0.0794866	0.523416	0.320708	0.0292723
X332.33157652261878	Positive	0.898376	0.179732	0.94149	0.00637949	0.546411	0.999905	0.024059	0.472134	0.256353	0.0194743
X329.22993094517921	Positive	0.755676	0.596485	0.0410251	0.028104	0.998266	0.245578	0.173907	0.357951	0.260282	0.999075
X329.20106926524107	Positive	0.810835	0.159361	0.152765	0.010326	0.6152	0.598921	0.0546618	1	0.429929	0.444456
X328.8541655067724	Positive	0.487195	0.0534892	0.0779238	0.0116065	0.54511	0.682155	0.151781	0.999081	0.853028	0.732596
X322.8879826747787	Positive	0.303	0.17686	0.0145831	0.0052538	0.99438	0.323396	0.122892	0.511894	0.216574	0.955268
X316.21295970454042	Positive	0.0473687	0.0709261	0.0150977	0.00121993	0.9988	0.941732	0.166957	0.849107	0.113354	0.44538
X313.23610733847812	Positive	0.587839	0.354601	0.0424012	0.00322309	0.989968	0.374546	0.029966	0.612746	0.0605138	0.465681
X310.13119081901829	Positive	0.880851	0.0813002	0.0688296	0.0386821	0.310311	0.268826	0.159005	0.999963	0.987564	0.995256
X309.12787099677058	Positive	0.803396	0.0505552	0.0861278	0.01184	0.259776	0.404351	0.0644221	0.996434	0.873845	0.70412
X306.87237373276639	Positive	0.333195	0.349413	0.0103731	0.00626028	0.999999	0.216005	0.131774	0.204866	0.124591	0.996629
X306.87228510250333	Positive	0.47737	0.0867352	0.064813	0.00522611	0.730893	0.625241	0.0690646	0.999659	0.402502	0.499275
X305.30406029973858	Positive	0.826342	0.165859	0.726105	0.00307988	0.612237	0.999606	0.0144348	0.72225	0.134394	0.0194883
X304.3008233545554	Positive	0.831375	0.160955	0.710147	0.00231742	0.59451	0.999183	0.0104392	0.726937	0.102043	0.0149267
X304.30031033536881	Positive	0.977123	0.265772	0.848198	0.0181567	0.528103	0.991253	0.0436087	0.770219	0.434988	0.0856637
X302.19752174796218	Positive	0.117353	0.178284	0.0517786	0.00161859	0.998348	0.981663	0.0946397	0.919775	0.0612515	0.208204
X301.96788688138111	Positive	0.52297	0.600089	0.545601	0.0214125	0.999902	0.999999	0.245005	0.999976	0.201898	0.231473
X299.18337474929069	Positive	0.785993	0.461925	0.0102404	0.00660642	0.973371	0.0585717	0.0370645	0.144108	0.0924385	0.998059
X296.25919828380421	Positive	0.94919	0.919344	0.513535	0.0214522	0.999966	0.884074	0.0645729	0.921411	0.0760606	0.251307
X294.94025465970572	Positive	0.51024	0.148507	0.0229341	0.0162104	0.87353	0.268772	0.196273	0.74306	0.617203	0.999314
X291.2550249898153	Positive	0.724692	0.432823	0.156783	0.00621725	0.981823	0.702532	0.0416378	0.936818	0.0946728	0.284101
X289.29411813098551	Positive	0.999985	0.58615	0.321198	0.0472754	0.634731	0.358235	0.0540183	0.98234	0.409145	0.696014
X289.29410391887461	Positive	0.950141	0.367559	0.214822	0.0224078	0.745842	0.520759	0.0670501	0.993492	0.380279	0.591985
X289.14051415476268	Positive	0.249339	0.085254	0.00437391	0.00145009	0.944293	0.126351	0.0373197	0.350885	0.115038	0.92684
X288.86173607365561	Positive	0.313837	0.609187	0.305523	0.011824	0.97413	1	0.259791	0.970741	0.111201	0.267144
X288.86164421870848	Positive	0.541783	0.148148	0.191566	0.00530101	0.848463	0.916499	0.0583318	0.999741	0.2583	0.201989
X287.89030664857188	Positive	0.636714	0.279676	0.412562	0.00616328	0.946434	0.992769	0.0526906	0.997723	0.158126	0.09985
X287.14844672750547	Positive	0.180114	0.0503152	0.0563232	0.00248278	0.911414	0.933999	0.0978346	0.999992	0.325698	0.296256
X283.17635485547248	Positive	0.947657	0.238925	0.287267	0.0108507	0.568602	0.645299	0.0325713	0.999909	0.315507	0.263455
X283.17616614302881	Positive	0.908532	0.136948	0.238373	0.0221674	0.432687	0.642503	0.0826386	0.994583	0.76037	0.54633
X279.98596911148701	Positive	0.334387	0.238786	0.202366	0.00443633	0.998935	0.995298	0.0917318	0.999948	0.134381	0.159981
X271.15374711770647	Positive	0.769915	0.335409	0.0777223	0.0187944	0.916608	0.404025	0.113443	0.843094	0.361291	0.883881
X271.11643366540733	Positive	0.894307	0.50628	0.832116	0.0104292	0.938789	0.999868	0.0408656	0.971481	0.129572	0.051503
X266.87948219920338	Positive	0.55457	0.456772	0.0770517	0.00428717	0.999711	0.608324	0.0448215	0.710314	0.0593975	0.374303
X263.23796923925642	Positive	0.353246	0.188968	0.0256609	0.00464066	0.989187	0.438426	0.0900454	0.692366	0.179518	0.783459
X262.7595306789874	Positive	0.991613	0.300363	0.462537	0.0288175	0.504619	0.701676	0.0563236	0.996129	0.545553	0.365778
X260.76251258978908	Positive	0.977234	0.243054	0.431277	0.0260823	0.492229	0.741432	0.0627354	0.990343	0.597489	0.364323
X260.159311702173	Positive	0.184047	0.0759664	0.0149161	0.00141543	0.973524	0.504985	0.0507294	0.825219	0.125342	0.508203
X258.28015510617428	Positive	0.634188	0.646673	0.279782	0.015756	1	0.947618	0.138188	0.941977	0.133723	0.371959
X258.11121523703838	Positive	0.514554	0.17501	0.170467	0.00266456	0.912173	0.905993	0.0298105	1	0.108891	0.111914
X255.94030615699421	Positive	0.707422	0.105037	0.230004	0.00190106	0.569355	0.85332	0.0120897	0.98136	0.126445	0.0557187
X254.9005801909459	Positive	0.383901	0.222923	0.033276	0.00431147	0.992922	0.490704	0.0750904	0.720658	0.140424	0.664947
X254.90052065159949	Positive	0.554016	0.561895	0.0403136	0.030408	1	0.387506	0.308115	0.380895	0.30247	0.99971
X246.86329420154519	Positive	0.768844	0.49887	0.715654	0.0186918	0.986773	0.999974	0.113185	0.994383	0.230535	0.131394
X244.89644081748571	Positive	0.363603	0.393845	0.0324358	0.00633575	0.999995	0.505559	0.120242	0.470827	0.108975	0.814395
X239.1498294008255	Positive	0.989442	0.234643	0.129835	0.036593	0.423967	0.251372	0.0745471	0.993157	0.733949	0.917181
X235.2066148106953	Positive	0.714432	0.316729	0.105922	0.00399206	0.934581	0.565326	0.0266856	0.934336	0.0874461	0.268134
X230.2488373469152	Positive	0.60757	0.313982	0.322432	0.0157401	0.974634	0.977701	0.148012	1	0.333007	0.32436
X228.26924708735959	Positive	0.935372	0.13006	0.486469	0.00453709	0.374554	0.885008	0.0140913	0.854647	0.251424	0.0578264
X226.95265298859769	Positive	0.634554	0.529544	0.05805	0.00848438	0.999674	0.432241	0.0740603	0.531047	0.0986562	0.722632
X226.95236958573591	Positive	0.298229	0.120445	0.0077408	0.00272404	0.9654	0.184515	0.0619432	0.42765	0.162465	0.945989
X226.18091782378491	Positive	0.386163	0.218944	0.235851	0.00252384	0.991708	0.994979	0.0414864	0.999998	0.0807785	0.0744172
X224.12920864027069	Positive	0.925586	0.115471	0.044868	0.00255035	0.353814	0.151627	0.0080458	0.969398	0.157971	0.366327
X224.12909263042781	Positive	0.458345	0.299856	0.0139768	0.00238785	0.996408	0.196429	0.0310886	0.315146	0.0531645	0.745341
X217.10564796675001	Positive	0.456522	0.0757237	0.0301409	0.000790749	0.704346	0.38449	0.00885896	0.972847	0.0639231	0.15737
X217.105386221711	Positive	0.672792	0.11817	0.023893	0.0258427	0.648491	0.185945	0.199964	0.833226	0.85587	0.999998
X215.12607361625271	Positive	0.576585	0.554667	0.0307056	0.00702539	0.999999	0.294634	0.0712963	0.310178	0.0757323	0.862159
X214.25375691751921	Positive	0.90553	0.321365	0.959163	0.013543	0.769675	0.999644	0.0509249	0.665348	0.285963	0.0378367
X214.25371877774489	Positive	0.74157	0.299716	0.617955	0.00283288	0.90543	0.999362	0.0170281	0.965281	0.0643036	0.0239497
X214.14701786653339	Positive	0.110566	0.0543328	0.0253028	0.000647857	0.989142	0.868713	0.0341591	0.986278	0.0699942	0.14773
X209.1261606848725	Positive	0.571871	0.307565	0.0989426	0.00244412	0.981343	0.683061	0.0230791	0.927825	0.0529509	0.17531
X207.17536492076161	Positive	0.793596	0.10599	0.0432367	0.00296287	0.48351	0.232418	0.0153435	0.974837	0.200176	0.428795
X203.22391755435211	Positive	0.504374	0.398344	0.557382	0.0223836	0.999511	0.999977	0.266992	0.997817	0.350104	0.233932
X202.18099762953869	Positive	0.0714508	0.101308	0.016646	0.00201482	0.999291	0.874116	0.194614	0.76754	0.139567	0.613021
X198.86326464463369	Positive	0.318295	0.0711673	0.00650172	0.00271616	0.835651	0.144353	0.0571563	0.54786	0.263753	0.970551
X196.86635637362389	Positive	0.303608	0.0640089	0.00455324	0.00190285	0.82057	0.105629	0.040565	0.453418	0.202971	0.968331
X195.9314365351693	Positive	0.281238	0.117571	0.0114511	0.00352009	0.970513	0.282415	0.087726	0.576377	0.215835	0.923485
X195.12368177717411	Positive	0.532223	0.246587	0.0319195	0.0221719	0.966789	0.337504	0.246955	0.6653	0.532821	0.999191
X193.93101492938669	Positive	0.568467	0.204285	0.07258	0.00807787	0.915575	0.572413	0.0842756	0.953563	0.281896	0.623282
X193.9309686967722	Positive	0.459285	0.368807	0.0519536	0.00832077	0.999686	0.564254	0.11801	0.668871	0.155502	0.754089
X193.93093212214731	Positive	0.286407	0.161495	0.0023323	0.00123995	0.993212	0.0546459	0.026546	0.102404	0.0500158	0.988898
X193.93077379420021	Positive	0.730996	0.138245	0.0380766	0.00892877	0.64829	0.244929	0.0597713	0.911731	0.429528	0.871652
X193.15929317976179	Positive	0.452647	0.337087	0.0501565	0.00751058	0.99907	0.558769	0.108419	0.696264	0.156108	0.729239
X186.9130115450952	Positive	0.162399	0.352505	0.159984	0.00883336	0.977367	1	0.373626	0.975855	0.17386	0.378351
X186.9128522424825	Positive	0.617437	0.146361	0.293679	0.031591	0.780068	0.962432	0.274164	0.986132	0.849928	0.588287
X184.17064676527889	Positive	0.640059	0.162432	0.0245527	0.00143176	0.795665	0.207157	0.0105711	0.734021	0.0587453	0.351499
X173.07946765694061	Positive	0.614679	0.452425	0.356446	0.0211147	0.998008	0.985906	0.192091	0.99958	0.289569	0.373841
X171.169610111292	Positive	0.683282	0.960025	0.055869	0.0196408	0.960319	0.378533	0.150313	0.153257	0.0548594	0.957514
X164.93085496760321	Positive	0.604309	0.45082	0.0648671	0.00467013	0.998377	0.497339	0.0428371	0.654413	0.0662861	0.45803
X164.93084106230339	Positive	0.479506	0.0737957	0.0203326	0.0161013	0.670456	0.261307	0.211602	0.914405	0.856275	0.999856
X164.11332318386829	Positive	0.74216	0.0790237	0.095904	0.00115995	0.43529	0.501286	0.00635865	0.999931	0.0961881	0.0792598
X163.99070713587611	Positive	0.428934	0.0664343	0.0550756	0.00360934	0.687372	0.61908	0.0536635	0.999942	0.363298	0.420612
X163.12894713277711	Positive	0.524732	0.0810155	0.0524067	0.000879184	0.657335	0.499927	0.00827321	0.998369	0.0678022	0.104445
X158.96514453540351	Positive	0.502839	0.284659	0.0202557	0.00811066	0.988563	0.245327	0.101512	0.445188	0.202959	0.971137
X158.96484177340841	Positive	0.772931	0.341651	0.0753489	0.0248701	0.919405	0.391603	0.147585	0.827234	0.441569	0.948174
X151.09739622599821	Positive	0.577324	0.390286	0.0864606	0.00508113	0.995959	0.627788	0.0505095	0.818856	0.0875671	0.394224
X151.0730017294774	Positive	0.193472	0.0659267	0.0133648	0.00278301	0.947807	0.448635	0.102709	0.834342	0.288526	0.816209
X151.036096157	Positive	0.839684	0.0978155	0.210187	0.0399678	0.407497	0.688836	0.188767	0.983476	0.975179	0.804063
X149.02399282054401	Positive	0.464638	0.185602	0.0648896	0.0121392	0.950711	0.639428	0.168797	0.9523	0.431133	0.809178
X146.98125096371419	Positive	0.255797	0.190565	0.0624752	0.00159961	0.999484	0.87038	0.0405911	0.941614	0.0562512	0.172815
X145.98567124118051	Positive	0.285262	0.21402	0.0673223	0.00238325	0.999492	0.856709	0.0562439	0.932402	0.0777281	0.243713
X144.98308572835029	Positive	0.297989	0.259652	0.0799833	0.00242282	0.99997	0.888697	0.0544339	0.924139	0.0638332	0.211993
X144.93922888833339	Positive	0.579084	0.0766615	0.0592192	0.00116525	0.581743	0.489771	0.00985594	0.999792	0.0996434	0.128237
X144.17554560145729	Positive	0.497204	0.0651997	0.0178552	0.000750715	0.606322	0.222079	0.00743779	0.912941	0.0697586	0.241163
X144.1753957565262	Positive	0.366508	0.0621947	0.0208608	0.00100251	0.735828	0.360106	0.0154348	0.950659	0.102907	0.284537
X143.9603048530451	Positive	0.225628	0.0681083	0.0237206	0.00224377	0.923381	0.593072	0.0685877	0.956323	0.227063	0.527744
X142.94886601034651	Positive	0.408729	0.118513	0.00291159	0.0175308	0.891252	0.0451798	0.276797	0.17683	0.730384	0.741841
X141.9842428256006	Positive	0.180945	0.0537775	0.0344775	0.00120195	0.924213	0.808789	0.0427113	0.998268	0.145651	0.220204
X141.95958668272269	Positive	0.458676	0.121616	0.0699959	0.00407607	0.858156	0.673569	0.0559271	0.995705	0.241368	0.386939
X140.9951331691727	Positive	0.186562	0.0549841	0.0223698	0.000989067	0.922066	0.647418	0.0328425	0.97509	0.114276	0.264026
X139.98886687754779	Positive	0.190911	0.065196	0.0529282	0.00173895	0.948323	0.908758	0.0617607	0.999912	0.181539	0.219878
X138.04460921121739	Positive	0.423064	0.58228	0.127671	0.0154968	0.997988	0.89877	0.238302	0.764766	0.155751	0.658046
X135.11508043942351	Positive	0.723218	0.124459	0.098435	0.00295284	0.61656	0.529646	0.018766	0.999845	0.171129	0.213736
X134.1120244437717	Positive	0.717665	0.167615	0.0562911	0.00200052	0.734566	0.352609	0.0124345	0.947125	0.0831104	0.239981
X133.12805672752759	Positive	0.555881	0.127424	0.0400664	0.00148669	0.788312	0.384077	0.0138208	0.938369	0.0790131	0.240182
X131.1630928392091	Positive	0.657156	0.187716	0.0207959	0.00178644	0.829181	0.169913	0.0129295	0.618172	0.0648496	0.484168
X130.15985083214159	Positive	0.675368	0.217963	0.0241809	0.00255328	0.861519	0.186795	0.0182697	0.614059	0.0822196	0.572521
X130.15960541218851	Positive	0.421142	0.0791233	0.0129137	0.00103606	0.75767	0.202503	0.0134598	0.764862	0.084266	0.434767
X130.15954992528131	Positive	0.340973	0.0889966	0.046749	0.00845547	0.875183	0.665856	0.17311	0.99266	0.56574	0.794666
X124.93855143161061	Positive	0.857133	0.128808	0.528172	0.0430269	0.479981	0.96871	0.190924	0.816501	0.948398	0.430584
X124.0876927116514	Positive	0.644899	0.179715	0.114715	0.0348324	0.825197	0.665289	0.279527	0.997828	0.814262	0.932694
X124.0875030741003	Positive	0.46414	0.12812	0.031674	0.00258803	0.868348	0.392649	0.0334224	0.887439	0.144882	0.482333
X123.09704562233181	Positive	0.290622	0.140585	0.0283674	0.00384966	0.984031	0.553779	0.0929917	0.830849	0.199162	0.6784
X121.0881932414147	Positive	0.832575	0.115482	0.142699	0.00327827	0.470718	0.547262	0.015127	0.999892	0.204472	0.166788
X120.0039224911209	Positive	0.987963	0.590022	0.775668	0.0136249	0.843078	0.956724	0.0282745	0.996773	0.13466	0.0809058
X118.12347882131969	Positive	0.433271	0.14944	0.0287845	0.00357692	0.927129	0.391991	0.0524294	0.815844	0.17428	0.644056
X118.1234313544734	Positive	0.79475	0.60485	0.038447	0.00847626	0.996332	0.208362	0.0468566	0.333253	0.080208	0.854347
X117.9603679828753	Positive	0.201008	0.0508779	0.0290803	0.00142034	0.886405	0.713189	0.04629	0.995782	0.184232	0.303071
X115.9651241694695	Positive	0.205265	0.0577816	0.0267325	0.00133162	0.910711	0.674746	0.0419794	0.985846	0.152392	0.305545
X114.9664084551699	Positive	0.201589	0.152292	0.102609	0.00159007	0.999627	0.989604	0.052557	0.998744	0.0709157	0.106174
X114.8941190867539	Positive	0.921705	0.174015	0.228574	0.0124519	0.496558	0.602677	0.0433155	0.999642	0.462491	0.368796
X113.9643953643473	Positive	0.877494	0.500791	0.143406	0.0229911	0.947513	0.492203	0.097376	0.871026	0.27577	0.756487
X113.9643488565121	Positive	0.958925	0.640125	0.712568	0.0170385	0.94364	0.971258	0.0478941	0.999925	0.146786	0.121035
X112.8965646038672	Positive	0.966695	0.21649	0.304335	0.0219665	0.481895	0.620311	0.0582801	0.998976	0.581615	0.446262
X111.9695544602274	Positive	0.444365	0.425335	0.231427	0.00367576	0.999999	0.984453	0.0522026	0.988312	0.055356	0.114173
X111.0203623696266	Positive	0.227774	0.117558	0.0394836	0.00307909	0.989876	0.771207	0.0961165	0.949756	0.188712	0.472762
X108.96227673167429	Positive	0.703862	0.141663	0.059438	0.00119286	0.685403	0.379914	0.00727495	0.976617	0.054874	0.131202
X105.9546647285777	Positive	0.29598	0.189174	0.0568461	0.00150043	0.997201	0.792606	0.0318553	0.925714	0.0526776	0.176241
X105.0673328271712	Positive	0.300991	0.132838	0.0387239	0.00547588	0.975423	0.651923	0.129217	0.923871	0.293737	0.702643
X103.95636056959999	Positive	0.319428	0.249073	0.0761108	0.00202073	0.999678	0.853856	0.0408711	0.923579	0.0545979	0.184054
X103.13176696450211	Positive	0.563469	0.0874359	0.0369737	0.00114362	0.645921	0.354286	0.0100602	0.978595	0.0855529	0.195902
X103.0550223334196	Positive	0.805587	0.144247	0.0323028	0.00795612	0.583085	0.171894	0.0423894	0.860387	0.378364	0.883015
X102.12858649237469	Positive	0.942633	0.383327	0.241795	0.0108081	0.779395	0.584542	0.0334474	0.996099	0.191469	0.31092
X102.1285746601459	Positive	0.762996	0.056606	0.0596811	0.00104895	0.318054	0.332339	0.00536965	1	0.118858	0.112896
X102.1284949013226	Positive	0.588209	0.135037	0.1273	0.0191192	0.778762	0.758224	0.187261	0.999999	0.713673	0.735207
X102.1284793737528	Positive	0.792618	0.0896083	0.0663546	0.000777488	0.427718	0.336925	0.00354647	0.999614	0.0528447	0.0714946
X100.95771509680119	Positive	0.315093	0.103497	0.0671675	0.00232799	0.93109	0.821849	0.0487218	0.998367	0.15954	0.238581
X595.86577996748008	Positive	0.73702	0.167073	0.00553006	0.0576335	0.713951	0.0354923	0.343659	0.240234	0.951359	0.562262
X497.88929336704763	Positive	0.904868	0.391754	0.0198474	0.125272	0.847153	0.0752113	0.408435	0.322564	0.916606	0.753955
X353.11795869331422	Positive	0.892072	0.094898	0.0698934	0.0781121	0.340345	0.261892	0.288543	0.999583	0.99993	0.999993
X214.91877647375401	Positive	0.999021	0.960903	0.851509	0.058321	0.888076	0.728531	0.0397218	0.996753	0.158638	0.255829

## Sheet: Table_S7
EC number	Suggested Metabolite	Input mz	Ion	Mode	D3vD9	D3vD28	D9vD28	RT	In-house library
E3	3-Dehydroxycarnitine	168.1	M+Na[1+]	pos	x		x	204.942
E4	Tetracosapentaenoyl carnitine	524.371	M+Na[+1]	pos		x		180.289	LPC18:0
E29	Docosa-4,7,10,13,16-pentaenoyl carnitine	496.34	M+Na[+1]	pos		x		181.579	LPC16:0
E11	10-formyltetrahydrofolate-[Glu](5)	492.651	M+2H[2+]	pos	x	x		228.384
E48***	10-formyltetrahydrofolate-[Glu](5)	998.277	M-H+O[-]	neg	x		x	225.692
E13	Oxadized glutathione	613.1598 and 635.1419	M+[H+] and M+Na[1+]	pos		x	x	354.376 and 354.4895	Oxadized glutathione
E30	Reduced Glutatione	307.0844 and 308.0908	M+[H+] and M+Na[1+]	pos		x	x	353.4975 and 354.413	Reduced Glutatione
E33	12-oxo-20-dihydroxy-leukotriene B4)	388.185	M+Na[1+]	pos		x	x	67.964
E1 ***	pentaglutamyl folate (DHF)	998.277	M+HCOO[-]	neg	x		x	225.692
E17	16alpha-Hydroxyprogesterone	375.217	M+HCOO[-]	neg	x		x	332.066
E16	N-Acetyl-L-glutamate	248.077	M+CH3OO[-]	neg		x		210.664
E22**	N-Acetyl-L-glutamate 5-semialdehyde	172.061	M-H[-]	neg		x		86.7915
E61**	1-Pyrroline-2-carboxylate	172.061	M+CH3OO[-]	neg		x		86.7915
E28	L-Homocysteine/L-cysteine	180.032	M+HCOO[-]/M+CH3COO[-]	neg	x			137.745
E9*	Sucrose	365.106	M+Na[1+]	pos			x	275.654
E26	IMP	417.041	M+HCOONa[1+]	pos		x		105.347
E43*	4-hydroxyestrone sulfate	365.106	M[1+]	pos			x	275.654
E37	trans-Tetradec-2-enoyl-CoA	488.657	M+2H[2+]	pos	x			228.405
E34	CE5838	485.359	M+Na[+1]	pos		x		214.083
E2	(+)-gama-tocopherol	485.352	M+HCOONa[1+]	pos		x		214.083
E6	Bromobenzene	159.9646 and 178.0462	M+[H+] and M+Na[1+]	pos			x	255.117 and 253.771
E32	Acetyl Phosphate	140.995	M+[H1+]	pos		x		423.002

## Sheet: Table_S6
Metabolite	3 vs. 6	3 vs. 9	3 vs. 16	3 vs. 28	6 vs. 9	6 vs. 16	6 vs. 28	9 vs. 16	9 vs. 28	16 vs. 28
Label Enrichment (13C-Glucose)	p-values	p-values	p-values	p-values	p-values	p-values	p-values	p-values	p-values	p-values
UDP-Glucose	0.8825	0.2735	0.0833	0.7574	0.7272	0.3001	0.9954	0.9088	0.9393	0.5836
UDP-glucose M+6	0.5858	0.0461	0.015	0.2928	0.3736	0.1323	0.9332	0.9312	0.8724	0.5107
UDP-glucose M+11	0.7412	0.1092	0.0325	0.4984	0.5282	0.1894	0.9761	0.914	0.9024	0.5266
N-Acetyl-Glucosamine	0.9922	0.4106	0.1559	>0,9999	0.6339	0.2768	0.9991	0.9411	0.5837	0.2726
N-Acetyl-Glucosamine M+6	0.0318	0.0104	0.0052	0.3909	0.929	0.7009	0.6394	0.9841	0.2951	0.1591
N-Acetyl-Glucosamine M+11	0.8669	0.0373	0.0095	0.1343	0.15	0.0369	0.4161	0.8639	0.9848	0.6603
Aspartate	0.0063	0.0001	<0,0001	0.0002	0.0526	0.0003	0.0309	0.0172	0.9472	0.0914
Glutathione	0.9998	0.9638	0.6035	0.0244	0.9214	0.5125	0.0197	0.9156	0.0564	0.1643
Glutamate	0.9996	0.9969	0.9645	0.0131	0.9819	0.9124	0.0102	0.9977	0.0199	0.0296
Unlabelled data	p-values	p-values	p-values	p-values	p-values	p-values	p-values	p-values	p-values	p-values
LPC18:0	0.3109	0.3319	0.2544	0.0083	>0,9999	0.9999	0.1889	0.9996	0.1756	0.2336
LPC16:0	0.1361	0.2121	0.275	0.0131	>0,9999	0.9839	0.5205	0.9921	0.595	0.2852
Reduced Glutathione	0.4774	0.0867	0.0648	0.0052	0.7309	0.6252	0.0691	0.9997	0.4025	0.4993
Oxadized Glutathione	0.9949	0.9999	0.9998	0.0079	0.9993	0.9995	0.014	>0,9999	0.0099	0.0102
UDP-Glucose
N-Acetyl-Glucosamine
Aspartate
Glutamate
Glutathione

## Sheet: IS_supplemtable
	C in Stock (mg/mL)	C in MIX (mg/mL)	V from Stock (mL)	Bring to volume
19:0 Lyso PC	1900	50	263	10 mL
Adenine-15N2	1000	50	500
Alanine d4	50000	500	100
AMP 13C10 15N5 (already soltuted in ACN:H2O)	5000	50	100
Arginine (13C, 15N4)	25000	50	20
Carnitine d9	20000	20	10
Citric acid (13C6)	1000	50	500
Cysteine 13C3, 15N	10000	50	50
Glucose 13C6	100000	2100	210
Glutamic Acid d5	5000	30	60
Glutamine (labelled)	5000	50	100
Lysine d4	5000	90	180
Malonic acid d4	1000	50	500
Octanoic Acid d15	10000	150	150
Phenylalanine d2	5000	72	144
Phtalic Acid d4	5000	50	100
Succinic acid d4	5000	50	100

## Sheet: CCmix_supplemtable
CC-Mixes - March 2017 - Extracellular (Freezer 2 - somewhere in Falcon-tubes)	CC-dilution steps																CCMix
	CC1	CC2	CC3	CC4	CC5	CC6	CC7	CC8	CC9	CC10	CC11	CC12	Amount to be dissolved for Stock-solution	Total-Volume of Stock-solution	Solvent for Stock-Solution	Concentration in Stock-solution	Volume of Stock-Solution to be dried and reconstituted	Reconstitution volume	Solvent for reconstitution	Concentration of
CC-Mixes added [µL]	1140	570	285	143	71	36	178	89	45	22	11	6						[mL]		CC-Mix
	from CCMix	from CCMix	from CCMix	from CCMix	from CCMix	from CCMix	from 1:10	from 1:10	from 1:10	from 1:10	from 1:10	from 1:10
IS added [µL]	200	200	200	200	200	200	200	200	200	200	200	200
H2O:ACN = 1:1 added [µL]	660	1230	1515	1658	1729	1764	1622	1711	1755	1778	1789	1794
Total-Volume [µL]	2000	2000	2000	2000	2000	2000	2000	2000	2000	2000	2000	2000
[mg/L]		1	2	3	4	5	6	7	8	9	10	11	(mg)	(mL)	(/)	(mg/L)	(µL)	10 mL		(mg/L)
POS-34-Dihydroxyphenylacetate	11.4	5.7	2.85	1.43	0.71	0.36	0.178	0.089	0.045	0.022	0.011	0.006	10.6	1	ACN:H2O=1:1	10600	19	10 mL	ACN:H2O (1:1)	20
POS-4-hydroxyphenylpyruvate	11.4	5.7	2.85	1.43	0.71	0.36	0.178	0.089	0.045	0.022	0.011	0.006	18.8	2	ACN:H2O=1:1	9400	21	10 mL	ACN:H2O (1:1)	20
POS-5-MTA	5	2.5	1.25	0.63	0.31	0.16	0.078	0.039	0.02	0.01	0.005	0.002	18	1.8	H2O	10000	9	10 mL	ACN:H2O (1:1)	8.8
POS-5-methoxytryptophan	11.4	5.7	2.85	1.43	0.71	0.36	0.178	0.089	0.045	0.022	0.011	0.006	10.1	1	ACN:H2O=1:1	10100	20	10 mL	ACN:H2O (1:1)	20
POS-5-Phospho-Ribose-1-Diphosphate	11.4	5.7	2.85	1.43	0.71	0.36	0.178	0.089	0.045	0.022	0.011	0.006	25	2	ACN:H2O=1:1	12500	16	10 mL	ACN:H2O (1:1)	20
POS-7-dehydrocholesterol	11.4	5.7	2.85	1.43	0.71	0.36	0.178	0.089	0.045	0.022	0.011	0.006	15.5	2	Isopropanol	7750	26	10 mL	ACN:H2O (1:1)	20
POS-78-dihydrofolate	11.4	5.7	2.85	1.43	0.71	0.36	0.178	0.089	0.045	0.022	0.011	0.006	10	4	ACN:H2O=1:1	2500	80	10 mL	ACN:H2O (1:1)	20
POS-4-methyl-2-oxovaleric acid	25	12.5	6.25	3.13	1.56	0.78	0.391	0.195	0.098	0.049	0.024	0.012	20	1.8	ACN:H2O=1:1	11111	39	10 mL	ACN:H2O (1:1)	43.9
POS-Acetoacetate	11.4	5.7	2.85	1.43	0.71	0.36	0.178	0.089	0.045	0.022	0.011	0.006	13.5	2	ACN:H2O=1:1	6750	30	10 mL	ACN:H2O (1:1)	20
POS-Acetyl-carnitine	7.5	3.75	1.88	0.94	0.47	0.23	0.117	0.059	0.029	0.015	0.007	0.004	13	2	ACN:H2O=1:1	6500	20	10 mL	ACN:H2O (1:1)	13.2
POS-Acetyltaurine	11.4	5.7	2.85	1.43	0.71	0.36	0.178	0.089	0.045	0.022	0.011	0.006	10.1	1	ACN:H2O=1:1	10100	20	10 mL	ACN:H2O (1:1)	20
POS-Adenine	10	5	2.5	1.25	0.63	0.31	0.156	0.078	0.039	0.02	0.01	0.005	20.7	2	H2O + 0.1%FA	10350	17	10 mL	ACN:H2O (1:1)	17.5
POS-Adenosine	5	2.5	1.25	0.63	0.31	0.16	0.078	0.039	0.02	0.01	0.005	0.002	23.5	4	H2O + 100µLNH4OH(500mM)	5875	15	10 mL	ACN:H2O (1:1)	8.8
POS-ADMA	5	2.5	1.25	0.63	0.31	0.16	0.078	0.039	0.02	0.01	0.005	0.002	10	1	?	10000	9	10 mL	ACN:H2O (1:1)	8.8
POS-Alanine	150	75	37.5	18.75	9.38	4.69	2.344	1.172	0.586	0.293	0.146	0.073	17	2	ACN:H2O=1:1	8500	310	10 mL	ACN:H2O (1:1)	263.2
POS-Arachidonic acid	11.4	5.7	2.85	1.43	0.71	0.36	0.178	0.089	0.045	0.022	0.011	0.006	5	2	ACN	2500	80	10 mL	ACN:H2O (1:1)	20
POS-Arginine	100	50	25	12.5	6.25	3.13	1.563	0.781	0.391	0.195	0.098	0.049	25	2	ACN:H2O=1:1	12500	140	10 mL	ACN:H2O (1:1)	175.4
POS-Ascorbic acid	20	10	5	2.5	1.25	0.63	0.313	0.156	0.078	0.039	0.02	0.01	29	1.8	H2O	16111	22	10 mL	ACN:H2O (1:1)	35.1
POS-Asparagine	40	20	10	5	2.5	1.25	0.625	0.313	0.156	0.078	0.039	0.02	24	2	H2O	12000	58	10 mL	ACN:H2O (1:1)	70.2
POS-Aspartic Acid	20	10	5	2.5	1.25	0.63	0.313	0.156	0.078	0.039	0.02	0.01	25	2	H2O:FormicAcid = 1:1	12500	28	10 mL	ACN:H2O (1:1)	35.1
POS-Aconitic acid	15	7.5	3.75	1.88	0.94	0.47	0.234	0.117	0.059	0.029	0.015	0.007	16.2	1.8	H2O	9000	29	10 mL	ACN:H2O (1:1)	26.3
POS-Biotin	5	2.5	1.25	0.63	0.31	0.16	0.078	0.039	0.02	0.01	0.005	0.002	12	8.6	H2O:NH4OH = 5:1	1395	63	10 mL	ACN:H2O (1:1)	8.8
POS-Carbamoyl phosphate	11.4	5.7	2.85	1.43	0.71	0.36	0.178	0.089	0.045	0.022	0.011	0.006	12	2	H2O	6000	33	10 mL	ACN:H2O (1:1)	20
POS-Carnitine	4	2	1	0.5	0.25	0.13	0.063	0.031	0.016	0.008	0.004	0.002	22	2	H2O	11000	6	10 mL	ACN:H2O (1:1)	7
POS-Cholic Acid	11.4	5.7	2.85	1.43	0.71	0.36	0.178	0.089	0.045	0.022	0.011	0.006	25	2	ACN:H2O=1:1	12500	16	10 mL	ACN:H2O (1:1)	20
POS-Choline	20	10	5	2.5	1.25	0.63	0.313	0.156	0.078	0.039	0.02	0.01	25.2	2	ACN:H2O=1:1	12600	28	10 mL	ACN:H2O (1:1)	35.1
POS-Citrulline	10	5	2.5	1.25	0.63	0.31	0.156	0.078	0.039	0.02	0.01	0.005	23	2	ACN:H2O=1:1	11500	15	10 mL	ACN:H2O (1:1)	17.5
POS-Creatine	5	2.5	1.25	0.63	0.31	0.16	0.078	0.039	0.02	0.01	0.005	0.002	27	2	H2O	13500	6	10 mL	ACN:H2O (1:1)	8.8
POS-Cystine	50	25	12.5	6.25	3.13	1.56	0.781	0.391	0.195	0.098	0.049	0.024	18	2	in 200mM NaOH	9000	97	10 mL	ACN:H2O (1:1)	87.7
POS-Cytidine	10	5	2.5	1.25	0.63	0.31	0.156	0.078	0.039	0.02	0.01	0.005	16.5	2	ACN:H2O=1:1	8250	21	10 mL	ACN:H2O (1:1)	17.5
POS-Cysteine	50	25	12.5	6.25	3.13	1.56	0.781	0.391	0.195	0.098	0.049	0.024	20	1.8	H2O	11111	79	10 mL	ACN:H2O (1:1)	87.7
POS-CMP	20	10	5	2.5	1.25	0.63	0.313	0.156	0.078	0.039	0.02	0.01	10	1.8	H2O	5556	63	10 mL	ACN:H2O (1:1)	35.1
POS-Dimethylglycine	10	5	2.5	1.25	0.63	0.31	0.156	0.078	0.039	0.02	0.01	0.005	1	0.1	H2O	10000	18	10 mL	ACN:H2O (1:1)	17.5
POS-dUMP	11.4	5.7	2.85	1.43	0.71	0.36	0.178	0.089	0.045	0.022	0.011	0.006	18	2	ACN:H2O=1:1	9000	22	10 mL	ACN:H2O (1:1)	20
POS-Dihydroorotic acid	20	10	5	2.5	1.25	0.63	0.313	0.156	0.078	0.039	0.02	0.01	2.2	12	H2O	183	1914	10 mL	ACN:H2O (1:1)	35.1
POS-Folate	10	5	2.5	1.25	0.63	0.31	0.156	0.078	0.039	0.02	0.01	0.005	5	2	Isopropanol	2500	70	10 mL	ACN:H2O (1:1)	17.5
POS-Fumarate	10	5	2.5	1.25	0.63	0.31	0.156	0.078	0.039	0.02	0.01	0.005	12.5	2	ACN:H2O=1:1	6250	28	10 mL	ACN:H2O (1:1)	17.5
POS-Fructose	250	125	62.5	31.25	15.63	7.81	3.906	1.953	0.977	0.488	0.244	0.122	28	1.8	H2O	15556	282	10 mL	ACN:H2O (1:1)	438.6
POS-Gluconate	20	10	5	2.5	1.25	0.63	0.313	0.156	0.078	0.039	0.02	0.01	25	2	H2O	12500	28	10 mL	ACN:H2O (1:1)	35.1
POS-Glucose	2500	1250	625	312.5	156.25	78.13	39.063	19.531	9.766	4.883	2.441	1.221	289	1.8	H2O	160556	273	10 mL	ACN:H2O (1:1)	4386
POS-Glutamic Acid	40	20	10	5	2.5	1.25	0.625	0.313	0.156	0.078	0.039	0.02	38	2	H2O	19000	37	10 mL	ACN:H2O (1:1)	70.2
POS-Glutamine	640	320	160	80	40	20	10	5	2.5	1.25	0.625	0.313	27	2	H2O	13500	832	10 mL	ACN:H2O (1:1)	1122.8
POS-Glutathione OX	335	167.5	83.75	41.88	20.94	10.47	5.234	2.617	1.309	0.654	0.327	0.164	20	2	ACN:H2O=1:1	10000	588	10 mL	ACN:H2O (1:1)	587.7
POS-Glutathione Red	175	87.5	43.75	21.88	10.94	5.47	2.734	1.367	0.684	0.342	0.171	0.085	11	2	ACN:H2O=1:1	5500	558	10 mL	ACN:H2O (1:1)	307
POS-Glycerol phosphat	20	10	5	2.5	1.25	0.63	0.313	0.156	0.078	0.039	0.02	0.01	19.7	2	ACN:H2O=1:1	9850	36	10 mL	ACN:H2O (1:1)	35.1
POS-Guanine	5	2.5	1.25	0.63	0.31	0.16	0.078	0.039	0.02	0.01	0.005	0.002	18.7	2	ACN:H2O=1:1	9350	9	10 mL	ACN:H2O (1:1)	8.8
POS-Guanosine	5	2.5	1.25	0.63	0.31	0.16	0.078	0.039	0.02	0.01	0.005	0.002	11.7	2	ACN:H2O=1:1	5850	15	10 mL	ACN:H2O (1:1)	8.8
POS-Glucosamine 6-phosphate	11.4	5.7	2.85	1.43	0.71	0.36	0.178	0.089	0.045	0.022	0.011	0.006	9.2	2	H2O	4600	43	10 mL	ACN:H2O (1:1)	20
POS-GDP	20	10	5	2.5	1.25	0.63	0.313	0.156	0.078	0.039	0.02	0.01	3.5	1.8	H2O	1944	180	10 mL	ACN:H2O (1:1)	35.1
POS-GMP	100	50	25	12.5	6.25	3.13	1.563	0.781	0.391	0.195	0.098	0.049	26.4	1.8	H2O	14667	120	10 mL	ACN:H2O (1:1)	175.4
POS-Glucose 6-phosphate	200	100	50	25	12.5	6.25	3.125	1.563	0.781	0.391	0.195	0.098	20.5	1.8	H2O	11389	308	10 mL	ACN:H2O (1:1)	350.9
POS-Histidine	75	37.5	18.75	9.38	4.69	2.34	1.172	0.586	0.293	0.146	0.073	0.037	18.7	2	ACN:H2O:FA = 1 : 1 : 0.01	9350	141	10 mL	ACN:H2O (1:1)	131.6
POS-Hydroxyproline	5	2.5	1.25	0.63	0.31	0.16	0.078	0.039	0.02	0.01	0.005	0.002	0.5	0.5		1000	88	10 mL	ACN:H2O (1:1)	8.8
POS-Hypoxanthine	35	17.5	8.75	4.38	2.19	1.09	0.547	0.273	0.137	0.068	0.034	0.017	20.5	6	ACN:H2O:FA = 1:1:1	3417	180	10 mL	ACN:H2O (1:1)	61.4
POS-Homocysteine	11.4	5.7	2.85	1.43	0.71	0.36	0.178	0.089	0.045	0.022	0.011	0.006	10	2	H2O	5000	40	10 mL	ACN:H2O (1:1)	20
POS-Hydroxyglutarate	11.4	5.7	2.85	1.43	0.71	0.36	0.178	0.089	0.045	0.022	0.011	0.006	7.4	1	ACN:H2O=1:1	7400	27	10 mL	ACN:H2O (1:1)	20
POS-Inosine	25	12.5	6.25	3.13	1.56	0.78	0.391	0.195	0.098	0.049	0.024	0.012	20	2	ACN:H2O=1:1	10000	44	10 mL	ACN:H2O (1:1)	43.9
POS-Isocitrate	11.4	5.7	2.85	1.43	0.71	0.36	0.178	0.089	0.045	0.022	0.011	0.006	21	2	H2O	10500	19	10 mL	ACN:H2O (1:1)	20
POS-(Iso)leucine	300.05	150.02	75.01	37.51	18.75	9.38	4.688	2.344	1.172	0.586	0.293	0.147	25.3	1.8	H2O	14056	375	10 mL	ACN:H2O (1:1)	526.4
POS-IMP	100	50	25	12.5	6.25	3.13	1.563	0.781	0.391	0.195	0.098	0.049	31	1.8	H2O	17222	102	10 mL	ACN:H2O (1:1)	175.4
POS-Lactic acid	900	450	225	112.5	56.25	28.13	14.063	7.031	3.516	1.758	0.879	0.439	20	2	H2O	10000	1579	10 mL	ACN:H2O (1:1)	1578.9
POS-Lysine	350	175	87.5	43.75	21.88	10.94	5.469	2.734	1.367	0.684	0.342	0.171	13.8	1.8	H2O	7667	801	10 mL	ACN:H2O (1:1)	614
POS-Malate	20	10	5	2.5	1.25	0.63	0.313	0.156	0.078	0.039	0.02	0.01	25.6	2	H2O	12800	27	10 mL	ACN:H2O (1:1)	35.1
POS-Mannitol	400	200	100	50	25	12.5	6.25	3.125	1.563	0.781	0.391	0.195	24	1.8	H2O	13333	526	10 mL	ACN:H2O (1:1)	701.8
POS-Mannose	20	10	5	2.5	1.25	0.63	0.313	0.156	0.078	0.039	0.02	0.01	10.8	2	ACN:H2O=1:1	5400	65	10 mL	ACN:H2O (1:1)	35.1
POS-Melatonin	11.4	5.7	2.85	1.43	0.71	0.36	0.178	0.089	0.045	0.022	0.011	0.006	16	2	Isopropanol	8000	25	10 mL	ACN:H2O (1:1)	20
POS-Methionine	25	12.5	6.25	3.13	1.56	0.78	0.391	0.195	0.098	0.049	0.024	0.012	23	2	ACN:H2O:FA = 1 : 1 : 0.01	11500	38	10 mL	ACN:H2O (1:1)	43.9
POS-Methylhistidine	5	2.5	1.25	0.63	0.31	0.16	0.078	0.039	0.02	0.01	0.005	0.002	0.5	0.5	?	1000	88	10 mL	ACN:H2O (1:1)	8.8
POS-Mevalonate	11.4	5.7	2.85	1.43	0.71	0.36	0.178	0.089	0.045	0.022	0.011	0.006	0.5	0.1	H2O	5000	40	10 mL	ACN:H2O (1:1)	20
POS-Nicotinamide	17	8.5	4.25	2.13	1.06	0.53	0.266	0.133	0.066	0.033	0.017	0.008	13.3	2	ACN:H2O=1:1	6650	45	10 mL	ACN:H2O (1:1)	29.8
POS-Ornithine	5	2.5	1.25	0.63	0.31	0.16	0.078	0.039	0.02	0.01	0.005	0.002	23	2	ACN:H2O=1:1	11500	8	10 mL	ACN:H2O (1:1)	8.8
POS-Orotate	15	7.5	3.75	1.88	0.94	0.47	0.234	0.117	0.059	0.029	0.015	0.007	23	4	ACN:H2O:NH4OH = 1.5 : 1.5 : 1	5750	46	10 mL	ACN:H2O (1:1)	26.3
POS-Oxalacetate	11.4	5.7	2.85	1.43	0.71	0.36	0.178	0.089	0.045	0.022	0.011	0.006	16	2	H2O	8000	25	10 mL	ACN:H2O (1:1)	20
POS-Oxoproline	90	45	22.5	11.25	5.63	2.81	1.406	0.703	0.352	0.176	0.088	0.044	21	2	H2O	10500	150	10 mL	ACN:H2O (1:1)	157.9
POS-Palmitate	11.4	5.7	2.85	1.43	0.71	0.36	0.178	0.089	0.045	0.022	0.011	0.006	23	2	Isopropanol	11500	17	10 mL	ACN:H2O (1:1)	20
POS-Palmitoylcarnitine	5	2.5	1.25	0.63	0.31	0.16	0.078	0.039	0.02	0.01	0.005	0.002	1	1	H2O	1000	88	10 mL	ACN:H2O (1:1)	8.8
POS-Phenylalanine	40	20	10	5	2.5	1.25	0.625	0.313	0.156	0.078	0.039	0.02	26	2	ACN:H2O=1:1	13000	54	10 mL	ACN:H2O (1:1)	70.2
POS-Phosphocholine	5	2.5	1.25	0.63	0.31	0.16	0.078	0.039	0.02	0.01	0.005	0.002	10	1	ACN:H2O=1:1	10000	9	10 mL	ACN:H2O (1:1)	8.8
POS-Proline	75	37.5	18.75	9.38	4.69	2.34	1.172	0.586	0.293	0.146	0.073	0.037	18	2	ACN:H2O=1:1	9000	146	10 mL	ACN:H2O (1:1)	131.6
POS-Pyruvate	400	200	100	50	25	12.5	6.25	3.125	1.563	0.781	0.391	0.195	17	1.8	H2O	9444	743	10 mL	ACN:H2O (1:1)	701.8
POS-Pyridoxine	10	5	2.5	1.25	0.63	0.31	0.156	0.078	0.039	0.02	0.01	0.005	14.4	1.8	H2O	8000	22	10 mL	ACN:H2O (1:1)	17.5
POS-Pyridoxic acid	20	10	5	2.5	1.25	0.63	0.313	0.156	0.078	0.039	0.02	0.01	4.5	2	in 0.1M NaOH + H2O	2250	156	10 mL	ACN:H2O (1:1)	35.1
POS-PABA	5	2.5	1.25	0.63	0.31	0.16	0.078	0.039	0.02	0.01	0.005	0.002	17.5	2	ACN:H2O=1:1	8750	10	10 mL	ACN:H2O (1:1)	8.8
POS-Panthotenic Acid	1000	500	250	125	62.5	31.25	15.625	7.813	3.906	1.953	0.977	0.488	25	1.8	H2O	13889	1263	10 mL	ACN:H2O (1:1)	1754.4
POS-Riboflavin	5	2.5	1.25	0.63	0.31	0.16	0.078	0.039	0.02	0.01	0.005	0.002	9.7	1.8	H2O	5389	16	10 mL	ACN:H2O (1:1)	8.8
POS-Raffinose	10	5	2.5	1.25	0.63	0.31	0.156	0.078	0.039	0.02	0.01	0.005	28.8	1.8	H2O	16000	11	10 mL	ACN:H2O (1:1)	17.5
POS-Retinol	11.4	5.7	2.85	1.43	0.71	0.36	0.178	0.089	0.045	0.022	0.011	0.006	25	1	Isopropanol	25000	8	10 mL	ACN:H2O (1:1)	20
POS-Ribose	20	10	5	2.5	1.25	0.63	0.313	0.156	0.078	0.039	0.02	0.01	29.8	1.8	H2O	16556	21	10 mL	ACN:H2O (1:1)	35.1
POS-SAH	5	2.5	1.25	0.63	0.31	0.16	0.078	0.039	0.02	0.01	0.005	0.002	1	1	H2O	1000	88	10 mL	ACN:H2O (1:1)	8.8
POS-SAMe	5	2.5	1.25	0.63	0.31	0.16	0.078	0.039	0.02	0.01	0.005	0.002	5	1	H2O	5000	18	10 mL	ACN:H2O (1:1)	8.8
POS-Serine	75	37.5	18.75	9.38	4.69	2.34	1.172	0.586	0.293	0.146	0.073	0.037	23	2	ACN:H2O=1:1	11500	114	10 mL	ACN:H2O (1:1)	131.6
POS-Serotonin	30	15	7.5	3.75	1.88	0.94	0.469	0.234	0.117	0.059	0.029	0.015	5.3	2	H2O	2650	199	10 mL	ACN:H2O (1:1)	52.6
POS-Spermine	11.4	5.7	2.85	1.43	0.71	0.36	0.178	0.089	0.045	0.022	0.011	0.006	18	2	ACN:H2O=1:1	9000	22	10 mL	ACN:H2O (1:1)	20
POS-Succinate	40	20	10	5	2.5	1.25	0.625	0.313	0.156	0.078	0.039	0.02	20	2	ACN:H2O=1:1	10000	70	10 mL	ACN:H2O (1:1)	70.2
POS-Sucrose	20	10	5	2.5	1.25	0.63	0.313	0.156	0.078	0.039	0.02	0.01	132	1.8	H2O	73333	5	10 mL	ACN:H2O (1:1)	35.1
POS-Taurine	15	7.5	3.75	1.88	0.94	0.47	0.234	0.117	0.059	0.029	0.015	0.007	15	2	H2O	7500	35	10 mL	ACN:H2O (1:1)	26.3
POS-Thiamine	5	2.5	1.25	0.63	0.31	0.16	0.078	0.039	0.02	0.01	0.005	0.002	12	2	ACN:H2O=1:1	6000	15	10 mL	ACN:H2O (1:1)	8.8
POS-Threonine	75	37.5	18.75	9.38	4.69	2.34	1.172	0.586	0.293	0.146	0.073	0.037	19	2	H2O	9500	139	10 mL	ACN:H2O (1:1)	131.6
POS-Tryptophan	200	100	50	25	12.5	6.25	3.125	1.563	0.781	0.391	0.195	0.098	11.5	2	ACN:H2O=1:1	5750	610	10 mL	ACN:H2O (1:1)	350.9
POS-Tyramine	11.4	5.7	2.85	1.43	0.71	0.36	0.178	0.089	0.045	0.022	0.011	0.006	18	2	ACN:H2O=1:1	9000	22	10 mL	ACN:H2O (1:1)	20
POS-Tyrosine	200	100	50	25	12.5	6.25	3.125	1.563	0.781	0.391	0.195	0.098	17	3	ACN:H2O:FA = 1:1:1	5667	619	10 mL	ACN:H2O (1:1)	350.9
POS-Tetrahydrofolate	11.4	5.7	2.85	1.43	0.71	0.36	0.178	0.089	0.045	0.022	0.011	0.006	25	2	65% pure powder; dissolved in DMSO	12500	16	10 mL	ACN:H2O (1:1)	20
POS-Uracil	10	5	2.5	1.25	0.63	0.31	0.156	0.078	0.039	0.02	0.01	0.005	13	6	ACN:H2O:NH4OH = 1:1:1	2167	81	10 mL	ACN:H2O (1:1)	17.5
POS-Uric Acid	10	5	2.5	1.25	0.63	0.31	0.156	0.078	0.039	0.02	0.01	0.005	5	6	in 200mM NaOH	833	211	10 mL	ACN:H2O (1:1)	17.5
POS-Uridine	20	10	5	2.5	1.25	0.63	0.313	0.156	0.078	0.039	0.02	0.01	20	2	H2O	10000	35	10 mL	ACN:H2O (1:1)	35.1
POS-UDP	20	10	5	2.5	1.25	0.63	0.313	0.156	0.078	0.039	0.02	0.01	9.6	2	H2O	4800	73	10 mL	ACN:H2O (1:1)	35.1
POS-UDP-glucose	50	25	12.5	6.25	3.13	1.56	0.781	0.391	0.195	0.098	0.049	0.024	7.5	2	H2O	3750	234	10 mL	ACN:H2O (1:1)	87.7
POS-UMP	20	10	5	2.5	1.25	0.63	0.313	0.156	0.078	0.039	0.02	0.01	25	2	H2O	12500	28	10 mL	ACN:H2O (1:1)	35.1
POS-Valine	400	200	100	50	25	12.5	6.25	3.125	1.563	0.781	0.391	0.195	28	2	H2O	14000	501	10 mL	ACN:H2O (1:1)	701.8
POS-Xanthine	15	7.5	3.75	1.88	0.94	0.47	0.234	0.117	0.059	0.029	0.015	0.007	1	6	in 200mM NaOH	167	1579	10 mL	ACN:H2O (1:1)	26.3
POS-Xanthosine	10	5	2.5	1.25	0.63	0.31	0.156	0.078	0.039	0.02	0.01	0.005	13.5	2	in 500mM NH4OH	6750	26	10 mL	ACN:H2O (1:1)	17.5
ACID-Glyceric Acid	10	5	2.5	1.25	0.63	0.31	0.156	0.078	0.039	0.02	0.01	0.005	14	2	H2O	7000	25	10 mL	ACN:H2O (1:1)	17.5
ACID-6P-Gluconic acid	20	10	5	2.5	1.25	0.63	0.313	0.156	0.078	0.039	0.02	0.01	9	1.8	ACN:H2O=1:1	5000	70	10 mL	ACN:H2O (1:1)	35.1
ACID-Lactose	17.1	8.55	4.28	2.14	1.07	0.53	0.267	0.134	0.067	0.033	0.017	0.008	18.6	2	H2O	9300	32	10 mL	ACN:H2O (1:1)	30
ACID-ADP	250	125	62.5	31.25	15.63	7.81	3.906	1.953	0.977	0.488	0.244	0.122	20.3	2	ACN:H2O=1:1	10150	432	10 mL	ACN:H2O (1:1)	438.6
ACID-ADP-Ribose	11.4	5.7	2.85	1.43	0.71	0.36	0.178	0.089	0.045	0.022	0.011	0.006	25	2	ACN:H2O=1:1	12500	16	10 mL	ACN:H2O (1:1)	20
ACID-AMP	100	50	25	12.5	6.25	3.13	1.563	0.781	0.391	0.195	0.098	0.049	15.5	2	ACN:H2O=1:1	7750	226	10 mL	ACN:H2O (1:1)	175.4
ACID-ATP	50	25	12.5	6.25	3.13	1.56	0.781	0.391	0.195	0.098	0.049	0.024	9.5	2	ACN:H2O=1:1	4750	185	10 mL	ACN:H2O (1:1)	87.7
ACID-cAMP	11.4	5.7	2.85	1.43	0.71	0.36	0.178	0.089	0.045	0.022	0.011	0.006	12.4	2	H2O	6200	32	10 mL	ACN:H2O (1:1)	20
ACID-Citrate	875	437.5	218.75	109.38	54.69	27.34	13.672	6.836	3.418	1.709	0.854	0.427	195	2	ACN:H2O=1:1	97500	157	10 mL	ACN:H2O (1:1)	1535.1
ACID-Erythrose 4-phosphate	11.4	5.7	2.85	1.43	0.71	0.36	0.178	0.089	0.045	0.022	0.011	0.006	5	2	H2O	2500	80	10 mL	ACN:H2O (1:1)	20
ACID-Fructose-6-phosphate	200	100	50	25	12.5	6.25	3.125	1.563	0.781	0.391	0.195	0.098	12	2	H2O	6000	585	10 mL	ACN:H2O (1:1)	350.9
ACID-Glucose 1-phosphate	11.4	5.7	2.85	1.43	0.71	0.36	0.178	0.089	0.045	0.022	0.011	0.006	2	2	in H2O	1000	200	10 mL	ACN:H2O (1:1)	20
ACID-2P-glyceric acid	20	10	5	2.5	1.25	0.63	0.313	0.156	0.078	0.039	0.02	0.01	10	1.8	H2O	5556	63	10 mL	ACN:H2O (1:1)	35.1
ACID-Pentose-5P-(Xylu-5P+Rib-5P)	31.41	15.7	7.85	3.93	1.96	0.98	0.491	0.245	0.123	0.061	0.031	0.015	5	1	ACN:H2O=1:1	5000	110	10 mL	ACN:H2O (1:1)	55.1
BASIC-23BisP glyceric acid	20	10	5	2.5	1.25	0.63	0.313	0.156	0.078	0.039	0.02	0.01	14	1.8	H2O	7778	45	10 mL	ACN:H2O (1:1)	35.1
BASIC-Phosphenylpyruvate	20	10	5	2.5	1.25	0.63	0.313	0.156	0.078	0.039	0.02	0.01	10.5	2	ACN:H2O=1:1	5250	67	10 mL	ACN:H2O (1:1)	35.1
																	21544.5
