# Supplementary material for: Metabolic and Transcriptional Changes across Osteogenic Differentiation of Mesenchymal Stromal Cells
Source: Bioengineering (Basel). 2021 Dec 10;8(12):208. doi: 10.3390/bioengineering8120208 (PMC8698318; doi:10.3390/bioengineering8120208)
Supplement: Supplementary file 1 [file bioengineering-08-00208-s001.zip › supplementary.table S9.xlsx]

## Sheet: filtered set of DEGs
Gene ID
ENSG00000106538
ENSG00000257017
ENSG00000112936
ENSG00000129988
ENSG00000133048
ENSG00000130203
ENSG00000130595
ENSG00000117594
ENSG00000149131
ENSG00000108551
ENSG00000145358
ENSG00000211445
ENSG00000123689
ENSG00000124249
ENSG00000137673
ENSG00000122176
ENSG00000084674
ENSG00000197766
ENSG00000274619
ENSG00000064205
ENSG00000029559
ENSG00000150681
ENSG00000154153
ENSG00000169071
ENSG00000237949
ENSG00000169031
ENSG00000138135
ENSG00000094963
ENSG00000081052
ENSG00000101938
ENSG00000213088
ENSG00000273259
ENSG00000137745
ENSG00000124212
ENSG00000187260
ENSG00000196136
ENSG00000151892
ENSG00000162706
ENSG00000163520
ENSG00000162849
ENSG00000125730
ENSG00000115252
ENSG00000131386
ENSG00000173376
ENSG00000249242
ENSG00000112796
ENSG00000222552
ENSG00000154736
ENSG00000115590
ENSG00000189221
ENSG00000205403
ENSG00000164112
ENSG00000124749
ENSG00000185885
ENSG00000138449
ENSG00000225670
ENSG00000174697
ENSG00000167244
ENSG00000171951
ENSG00000165507
ENSG00000182853
ENSG00000271447
ENSG00000134339
ENSG00000196616
ENSG00000198624
ENSG00000042062
ENSG00000107562
ENSG00000129757
ENSG00000162496
ENSG00000165995
ENSG00000244558
ENSG00000272824
ENSG00000107317
ENSG00000137975
ENSG00000108984
ENSG00000103196
ENSG00000196562
ENSG00000270885
ENSG00000064886
ENSG00000116678
ENSG00000278843
ENSG00000135929
ENSG00000255364
ENSG00000163975
ENSG00000204103
ENSG00000169242
ENSG00000215483
ENSG00000185924
ENSG00000250722
ENSG00000041353
ENSG00000119915
ENSG00000243137
ENSG00000137193
ENSG00000169218
ENSG00000104953
ENSG00000265972
ENSG00000159403
ENSG00000117643
ENSG00000228221
ENSG00000131979
ENSG00000156804
ENSG00000120837
ENSG00000130208
ENSG00000180447
ENSG00000126860
ENSG00000104043
ENSG00000230333
ENSG00000069431
ENSG00000136859
ENSG00000196611
ENSG00000205221
ENSG00000151692
ENSG00000150907
ENSG00000113916
ENSG00000204941
ENSG00000145934
ENSG00000091129
ENSG00000137285
ENSG00000140285
ENSG00000107968
ENSG00000138061
ENSG00000173432
ENSG00000121552
ENSG00000170873
ENSG00000258545
ENSG00000266714
ENSG00000161544
ENSG00000166482
ENSG00000122035
ENSG00000130303
ENSG00000235020
ENSG00000054938
ENSG00000142583
ENSG00000184557
ENSG00000006016
ENSG00000133321
ENSG00000028137
ENSG00000233901
ENSG00000170345
ENSG00000105516
ENSG00000106823
ENSG00000077942
ENSG00000170458
ENSG00000155792
ENSG00000237413
ENSG00000078114
ENSG00000121361
ENSG00000165029
ENSG00000099998
ENSG00000102802
ENSG00000198732
ENSG00000143196
ENSG00000122420
ENSG00000182752
ENSG00000137834
ENSG00000120875
ENSG00000145284
ENSG00000138207
ENSG00000163746
ENSG00000111341
ENSG00000134363
ENSG00000182326
ENSG00000120899
ENSG00000122861
ENSG00000145287
ENSG00000099994
ENSG00000152154
ENSG00000205236
ENSG00000173918
ENSG00000007933
ENSG00000163485
ENSG00000154930
ENSG00000073849
ENSG00000274180
ENSG00000136869
ENSG00000130600
ENSG00000116194
ENSG00000065717
ENSG00000067113
ENSG00000027697
ENSG00000162645
ENSG00000186907
ENSG00000186205
ENSG00000169891
ENSG00000161835
ENSG00000144152
ENSG00000081041
ENSG00000133639
ENSG00000035664
ENSG00000189058
ENSG00000162692
ENSG00000150540
ENSG00000112769
ENSG00000125968
ENSG00000126368
ENSG00000115738
ENSG00000107738
ENSG00000142303
ENSG00000140450
ENSG00000128262
ENSG00000183691
ENSG00000105664
ENSG00000168955
ENSG00000011465
ENSG00000085465
ENSG00000223953
ENSG00000007944
ENSG00000132386
ENSG00000187288
ENSG00000196839
ENSG00000233665
ENSG00000115380
ENSG00000137880
ENSG00000216490
ENSG00000174804
ENSG00000007255
ENSG00000103888
ENSG00000184500
ENSG00000161103
ENSG00000100336
ENSG00000259649
ENSG00000076258
ENSG00000105792
ENSG00000132000
ENSG00000104432
ENSG00000047648
ENSG00000174080
ENSG00000221869
ENSG00000264672
ENSG00000168461
ENSG00000116016
ENSG00000227746
ENSG00000167157
ENSG00000088280
ENSG00000282854
ENSG00000157514
ENSG00000189184
ENSG00000204381
ENSG00000060718
ENSG00000099864
ENSG00000167549
ENSG00000225511
ENSG00000101347
ENSG00000230712
ENSG00000172059
ENSG00000164949
ENSG00000165124
ENSG00000164188
ENSG00000139112
ENSG00000104419
ENSG00000125945
ENSG00000283009
ENSG00000144857
ENSG00000120549
ENSG00000116774
ENSG00000149212
ENSG00000243056
ENSG00000172594
ENSG00000276017
ENSG00000071282
ENSG00000157150
ENSG00000245812
ENSG00000064655
ENSG00000166900
ENSG00000134853
ENSG00000224594
ENSG00000163050
ENSG00000272841
ENSG00000112096
ENSG00000163884
ENSG00000249087
ENSG00000283106
ENSG00000087086
ENSG00000162687
ENSG00000183098
ENSG00000163083
ENSG00000110013
ENSG00000197329
ENSG00000169122
ENSG00000196549
ENSG00000106123
ENSG00000151117
ENSG00000241399
ENSG00000133466
ENSG00000143382
ENSG00000172216
ENSG00000100031
ENSG00000164920
ENSG00000250337
ENSG00000151726
ENSG00000255471
ENSG00000154188
ENSG00000215861
ENSG00000100342
ENSG00000259450
ENSG00000263238
ENSG00000137507
ENSG00000139329
ENSG00000153094
ENSG00000198885
ENSG00000114796
ENSG00000135338
ENSG00000185565
ENSG00000108387
ENSG00000185432
ENSG00000000971
ENSG00000120594
ENSG00000126561
ENSG00000170271
ENSG00000124813
ENSG00000108950
ENSG00000240694
ENSG00000165424
ENSG00000166033
ENSG00000166510
ENSG00000071967
ENSG00000056998
ENSG00000180573
ENSG00000234741
ENSG00000104415
ENSG00000148926
ENSG00000142089
ENSG00000181374
ENSG00000101955
ENSG00000175155
ENSG00000144802
ENSG00000109099
ENSG00000103145
ENSG00000244694
ENSG00000132170
ENSG00000275482
ENSG00000165655
ENSG00000100979
ENSG00000260578
ENSG00000272398
ENSG00000148344
ENSG00000168209
ENSG00000127863
ENSG00000166444
ENSG00000105373
ENSG00000157240
ENSG00000128536
ENSG00000226742
ENSG00000140545
ENSG00000118898
ENSG00000140044
ENSG00000164938
ENSG00000250657
ENSG00000212724
ENSG00000262862
ENSG00000279501
ENSG00000065328
ENSG00000164161
ENSG00000276953
ENSG00000233844
ENSG00000154146
ENSG00000127564
ENSG00000171848
ENSG00000101057
ENSG00000257219
ENSG00000170439
ENSG00000179750
ENSG00000117399
ENSG00000186185
ENSG00000163814
ENSG00000186193
ENSG00000183856
ENSG00000148773
ENSG00000165194
ENSG00000171241
ENSG00000121152
ENSG00000093009
ENSG00000237649
ENSG00000256268
ENSG00000104783
ENSG00000131153
ENSG00000117152
ENSG00000094804
ENSG00000154127
ENSG00000169607
ENSG00000129195
ENSG00000105011
ENSG00000143228
ENSG00000138180
ENSG00000167900
ENSG00000175063
ENSG00000156970
ENSG00000126787
ENSG00000087586
ENSG00000277909
ENSG00000230902
ENSG00000142945
ENSG00000157193
ENSG00000092853
ENSG00000138316
ENSG00000137310
ENSG00000013810
ENSG00000134690
ENSG00000135451
ENSG00000168078
ENSG00000166851
ENSG00000066279
ENSG00000011426
ENSG00000149090
ENSG00000169679
ENSG00000137807
ENSG00000024526
ENSG00000089685
ENSG00000011347
ENSG00000075218
ENSG00000178999
ENSG00000112984
ENSG00000118193
ENSG00000205177
ENSG00000134057
ENSG00000101447
ENSG00000122952
ENSG00000165480
ENSG00000175592
ENSG00000188229
ENSG00000185347
ENSG00000128606
ENSG00000189057
ENSG00000085999
ENSG00000179431
ENSG00000123485
ENSG00000165244
ENSG00000090889
ENSG00000117724
ENSG00000101412
ENSG00000146670
ENSG00000104368
ENSG00000197594
ENSG00000123416
ENSG00000137812
ENSG00000071539
ENSG00000109805
ENSG00000142731
ENSG00000261786
ENSG00000146950
ENSG00000113368
ENSG00000105825
ENSG00000182261
ENSG00000281166
ENSG00000011332
ENSG00000186871
ENSG00000109674
ENSG00000135454
ENSG00000135318
ENSG00000163808
ENSG00000280610
ENSG00000082126
ENSG00000173546
ENSG00000112742
ENSG00000138347
ENSG00000121211
ENSG00000113070
ENSG00000137309
ENSG00000115163
ENSG00000085840
ENSG00000111206
ENSG00000188522
ENSG00000105255
ENSG00000110031
ENSG00000112414
ENSG00000157456
ENSG00000076382
ENSG00000189320
ENSG00000110876
ENSG00000138675
ENSG00000117650
ENSG00000166803
ENSG00000182481
ENSG00000135476
ENSG00000099849
ENSG00000198901
ENSG00000158402
ENSG00000146410
ENSG00000139629
ENSG00000005884
ENSG00000075702
ENSG00000143476
ENSG00000088325
ENSG00000165490
ENSG00000100526
ENSG00000149948
ENSG00000143942
ENSG00000073111
ENSG00000267279
ENSG00000246859
ENSG00000106089
ENSG00000167772
ENSG00000171130
ENSG00000134986
ENSG00000145681
ENSG00000156113
ENSG00000067715
ENSG00000127586
ENSG00000174371
ENSG00000184661
ENSG00000167553
ENSG00000187741
ENSG00000164045
ENSG00000160957
ENSG00000074416
ENSG00000104356
ENSG00000180287
ENSG00000177602
ENSG00000101003
ENSG00000162073
ENSG00000168496
ENSG00000258232
ENSG00000100162
ENSG00000129810
ENSG00000112759
ENSG00000127423
ENSG00000162062
ENSG00000147536
ENSG00000229563
ENSG00000138160
ENSG00000072571
ENSG00000145147
ENSG00000171320
ENSG00000106537
ENSG00000131747
ENSG00000051180
ENSG00000105486
ENSG00000125637
ENSG00000100297
ENSG00000111247
ENSG00000128228
ENSG00000163507
ENSG00000135919
ENSG00000068489
ENSG00000167601
ENSG00000198826
ENSG00000104147
ENSG00000111665
ENSG00000035499
ENSG00000164611
ENSG00000138131
ENSG00000102384
ENSG00000119969
ENSG00000122966
ENSG00000123975
ENSG00000265415
ENSG00000228594
ENSG00000117632
ENSG00000138623
ENSG00000110427
ENSG00000206053
ENSG00000185567
ENSG00000132688
ENSG00000144959
ENSG00000198805
ENSG00000103966
ENSG00000213694
ENSG00000092820
ENSG00000112186
ENSG00000132436
ENSG00000205683
ENSG00000161888
ENSG00000180801
ENSG00000197646
ENSG00000164087
ENSG00000101945
ENSG00000189159
ENSG00000170312
ENSG00000222032
ENSG00000138650
ENSG00000182667
ENSG00000110104
ENSG00000067057
ENSG00000131462
ENSG00000183048
ENSG00000139734
ENSG00000100401
ENSG00000260549
ENSG00000162545
ENSG00000165304
ENSG00000138166
ENSG00000092470
ENSG00000107338
ENSG00000154277
ENSG00000138778
ENSG00000167513
ENSG00000135905
ENSG00000179242
ENSG00000109685
ENSG00000111602
ENSG00000080986
ENSG00000188486
ENSG00000126562
ENSG00000142002
ENSG00000225830
ENSG00000231290
ENSG00000149571
ENSG00000149428
ENSG00000280682
ENSG00000176014
ENSG00000160949
ENSG00000163659
ENSG00000013297
ENSG00000223749
ENSG00000188487
ENSG00000131470
ENSG00000146143
ENSG00000135074
ENSG00000267774
ENSG00000156299
ENSG00000108829
ENSG00000137804
ENSG00000040275
ENSG00000164109
ENSG00000225614
ENSG00000161681
ENSG00000188643
ENSG00000134013
ENSG00000123219
ENSG00000148677
ENSG00000121621
ENSG00000163535
ENSG00000108106
ENSG00000133119
ENSG00000125148
ENSG00000171208
ENSG00000187123
ENSG00000206190
ENSG00000143549
ENSG00000157111
ENSG00000161692
ENSG00000144583
ENSG00000162063
ENSG00000139278
ENSG00000173530
ENSG00000151388
ENSG00000187951
ENSG00000198668
ENSG00000091651
ENSG00000100003
ENSG00000115539
ENSG00000198768
ENSG00000280641
ENSG00000155011
ENSG00000172115
ENSG00000167670
ENSG00000185697
ENSG00000152127
ENSG00000154175
ENSG00000176692
ENSG00000100522
ENSG00000146376
ENSG00000106034
ENSG00000161800
ENSG00000146918
ENSG00000080493
ENSG00000112029
ENSG00000142949
ENSG00000044574
ENSG00000186575
ENSG00000138182
ENSG00000120802
ENSG00000089159
ENSG00000136824
ENSG00000183023
ENSG00000170558
ENSG00000170624
ENSG00000128641
ENSG00000057019
ENSG00000155307
ENSG00000104435
ENSG00000243440
ENSG00000259675
ENSG00000227925
ENSG00000160808
ENSG00000115602
ENSG00000267647
ENSG00000039537
ENSG00000118971
ENSG00000109819
ENSG00000198963
ENSG00000160801
ENSG00000118432
ENSG00000185149
ENSG00000232679
ENSG00000003989
ENSG00000104213
ENSG00000135821
ENSG00000200033
ENSG00000115919
ENSG00000175899
ENSG00000179869
ENSG00000234459
ENSG00000115604
ENSG00000256001
ENSG00000116690
ENSG00000238042
ENSG00000278266
ENSG00000105696
ENSG00000230537
ENSG00000128045
ENSG00000104332
ENSG00000001561
ENSG00000273707
ENSG00000179593
ENSG00000238840
ENSG00000004799
ENSG00000111913
ENSG00000175426
ENSG00000124882
ENSG00000101230
ENSG00000104267
ENSG00000130066
ENSG00000137869
ENSG00000259367
ENSG00000077420
ENSG00000143507
ENSG00000164142
ENSG00000251301
ENSG00000250934
ENSG00000114120
ENSG00000099282
ENSG00000134548
ENSG00000175197
ENSG00000176658
ENSG00000130513
ENSG00000196352
ENSG00000116667
ENSG00000143162
ENSG00000111859
ENSG00000171105
ENSG00000240666
ENSG00000150457
ENSG00000262655
ENSG00000154319
ENSG00000119729
ENSG00000102760
ENSG00000164463
ENSG00000108960
ENSG00000144560
ENSG00000109906
ENSG00000146278
ENSG00000283352
ENSG00000226334
ENSG00000182118
ENSG00000113389
ENSG00000102804
ENSG00000152527
ENSG00000214140
ENSG00000080546
ENSG00000115594
ENSG00000196569
ENSG00000116675
ENSG00000177076
ENSG00000223891
ENSG00000188313
ENSG00000138764
ENSG00000122641
ENSG00000176046
ENSG00000184347
ENSG00000183762
ENSG00000100344
ENSG00000100307
ENSG00000188906
ENSG00000049246
ENSG00000165312
ENSG00000158747
ENSG00000164056
ENSG00000153823
ENSG00000136436
ENSG00000174738
ENSG00000041982
ENSG00000139793
ENSG00000167323
ENSG00000147576
ENSG00000145244
ENSG00000181690
ENSG00000198839
ENSG00000169604
ENSG00000119138
ENSG00000165959
ENSG00000106299
ENSG00000006459
ENSG00000164823
ENSG00000100439
ENSG00000179241
ENSG00000111058
ENSG00000136235
ENSG00000181804
ENSG00000122547
ENSG00000145687
ENSG00000213462
ENSG00000148175
ENSG00000173598
ENSG00000143341
ENSG00000260618
ENSG00000154654
ENSG00000136732
ENSG00000123096
ENSG00000167996
ENSG00000145390
ENSG00000175938
ENSG00000130766
ENSG00000127314
ENSG00000115525
ENSG00000151491
ENSG00000163393
ENSG00000113594
ENSG00000147852
ENSG00000114480
ENSG00000259345
ENSG00000231312
ENSG00000065534
ENSG00000166289
ENSG00000196730
ENSG00000162733
ENSG00000206560
ENSG00000173482
ENSG00000166046
ENSG00000085117
ENSG00000185862
ENSG00000243244
ENSG00000048392
ENSG00000162944
ENSG00000260912
ENSG00000134769
ENSG00000003436
ENSG00000144724
ENSG00000049449
ENSG00000171444
ENSG00000145675
ENSG00000164330
ENSG00000168300
ENSG00000047936
ENSG00000069702
ENSG00000197442
ENSG00000163297
ENSG00000117262
ENSG00000070214
ENSG00000152661
ENSG00000233450
ENSG00000176532
ENSG00000164850
ENSG00000267141
ENSG00000248890
ENSG00000276365
ENSG00000140451
ENSG00000143867
ENSG00000262634
ENSG00000156103
ENSG00000254717
ENSG00000220785
ENSG00000157870
ENSG00000275125
ENSG00000163462
ENSG00000077152
ENSG00000105894
ENSG00000281165
ENSG00000160326
ENSG00000256083
ENSG00000051341
ENSG00000106462
ENSG00000079462
ENSG00000144354
ENSG00000136244
ENSG00000100065
ENSG00000187800
ENSG00000182584
ENSG00000158286
ENSG00000077264
ENSG00000171877
ENSG00000167912
ENSG00000185760
ENSG00000271936
ENSG00000149633
ENSG00000254639
ENSG00000089280
ENSG00000111641
ENSG00000167114
ENSG00000173267
ENSG00000276043
ENSG00000276657
ENSG00000197905
ENSG00000167552
ENSG00000188191
ENSG00000144230
ENSG00000112877
ENSG00000281398
ENSG00000169169
ENSG00000176890
ENSG00000179041
ENSG00000188766
ENSG00000184207
ENSG00000168067
ENSG00000169715
ENSG00000111664
ENSG00000185480
ENSG00000116455
ENSG00000198846
ENSG00000160193
ENSG00000115648
ENSG00000110400
ENSG00000164220
ENSG00000138092
ENSG00000079616
ENSG00000101361
ENSG00000139354
ENSG00000173638
ENSG00000242114
ENSG00000097046
ENSG00000178531
ENSG00000112118
ENSG00000166396
ENSG00000197208
ENSG00000203760
ENSG00000182272
ENSG00000166840
ENSG00000074047
ENSG00000258947
ENSG00000137486
ENSG00000117877
ENSG00000017483
ENSG00000154920
ENSG00000108797
ENSG00000161970
ENSG00000183763
ENSG00000124614
ENSG00000156398
ENSG00000128340
ENSG00000160298
ENSG00000178921
ENSG00000130816
ENSG00000100036
ENSG00000104524
ENSG00000172009
ENSG00000196584
ENSG00000240661
ENSG00000125912
ENSG00000126453
ENSG00000224093
ENSG00000115687
ENSG00000012048
ENSG00000156689
ENSG00000141499
ENSG00000174136
ENSG00000157680
ENSG00000275342
ENSG00000174442
ENSG00000177084
ENSG00000100092
ENSG00000159259
ENSG00000125454
ENSG00000151725
ENSG00000165661
ENSG00000133216
ENSG00000242125
ENSG00000140092
ENSG00000123473
ENSG00000132382
ENSG00000148840
ENSG00000214706
ENSG00000176454
ENSG00000164032
ENSG00000131351
ENSG00000236383
ENSG00000171680
ENSG00000134222
ENSG00000001617
ENSG00000129667
ENSG00000013016
ENSG00000101194
ENSG00000160072
ENSG00000137267
ENSG00000197415
ENSG00000147155
ENSG00000101311
ENSG00000205476
ENSG00000006634
ENSG00000261040
ENSG00000187193
ENSG00000100749
ENSG00000164687
ENSG00000084774
ENSG00000183963
ENSG00000164211
ENSG00000149782
ENSG00000174348
ENSG00000109625
ENSG00000141574
ENSG00000163815
ENSG00000128284
ENSG00000165899
ENSG00000283189
ENSG00000163251
ENSG00000100100
ENSG00000183250
ENSG00000185585
ENSG00000164342
ENSG00000111907
ENSG00000110002
ENSG00000154258
ENSG00000272825
ENSG00000196139
ENSG00000126353
ENSG00000173559
ENSG00000162804
ENSG00000154262
ENSG00000250038
ENSG00000101096
ENSG00000197299
ENSG00000129173
ENSG00000268941
ENSG00000266995
ENSG00000282147
ENSG00000251144
ENSG00000214402
ENSG00000185291
ENSG00000160161
ENSG00000121858
ENSG00000106819
ENSG00000271216
ENSG00000177706
ENSG00000184602
ENSG00000124191
ENSG00000106484
ENSG00000162998
ENSG00000267397
ENSG00000078725
ENSG00000166292
ENSG00000187634
ENSG00000170745
ENSG00000184678
ENSG00000204642
ENSG00000131669
ENSG00000170962
ENSG00000135931
ENSG00000176971
ENSG00000221955
ENSG00000188070
ENSG00000143819
ENSG00000168734
ENSG00000139625
ENSG00000130592
ENSG00000186340
ENSG00000162745
ENSG00000244534
ENSG00000250064
ENSG00000282849
ENSG00000198056
ENSG00000100558
ENSG00000120708
ENSG00000014138
ENSG00000136231
ENSG00000080839
ENSG00000149636
ENSG00000140525
ENSG00000149503
ENSG00000167325
ENSG00000125885
ENSG00000170017
ENSG00000169764
ENSG00000114346
ENSG00000225790
ENSG00000109272
ENSG00000169429
ENSG00000163737
ENSG00000185250
ENSG00000062282
ENSG00000184371
ENSG00000210196
ENSG00000124762
ENSG00000132640
ENSG00000161513
ENSG00000159388
ENSG00000157064
ENSG00000221963
ENSG00000138944
ENSG00000198763
ENSG00000125384
ENSG00000124875
ENSG00000253057
ENSG00000263828
ENSG00000241211
ENSG00000164694
ENSG00000267061
ENSG00000205644
ENSG00000214676
ENSG00000277027
ENSG00000049540
ENSG00000130176
ENSG00000154839
ENSG00000121904
ENSG00000095752
ENSG00000162630
ENSG00000157168
ENSG00000180914
ENSG00000143153
ENSG00000154027
ENSG00000049192
ENSG00000115461
ENSG00000140416
ENSG00000133110
ENSG00000072163
ENSG00000139211
ENSG00000249669
ENSG00000078269

## Sheet: Patient 6 | Day 9 vs Day 3 | up
ENSEMBL ID	Gene name	Biotype	Description	Base mean	log2 FC	P value	Adjusted P value	Reference expression (TPM)	Sample expression (TPM)	Discrete abs(log2 FC)	Significance in at least two out of three patients?
ENSG00000106538	RARRES2	protein_coding	retinoic acid receptor responder 2	1444.94	11.4341	1.3635e-34	3.0538e-32	0	80.7446	6.3576	yes
ENSG00000230836	LINC01293	lincRNA	NA	221.673	11.2884	2.0153e-17	1.9625e-15	0	4.8143	2.585	no
ENSG00000155307	SAMSN1	protein_coding	SAM domain, SH3 domain and nuclear localization signals 1	198.19	11.1272	7.4533e-17	6.8534e-15	0	2.8992	2	no
ENSG00000106565	TMEM176B	protein_coding	transmembrane protein 176B	196.211	11.1124	7.8438e-17	7.1913e-15	0	5.0658	2.585	no
ENSG00000245848	CEBPA	protein_coding	CCAAT enhancer binding protein alpha	658.794	11.0134	7.7026e-22	9.289e-20	0	6.0804	2.8074	no
ENSG00000167850	CD300C	protein_coding	CD300c molecule	150.432	10.7287	2.7856e-15	2.2686e-13	0	2.8135	2	no
ENSG00000257017	HP	protein_coding	haptoglobin	37166.6	10.6858	8.0802e-198	2.815e-194	0.4632	520.566	9.0279	yes
ENSG00000267034	RP11-384O8.1	lincRNA	NA	236.435	10.4257	5.9852e-15	4.7271e-13	0	4.6502	2.585	no
ENSG00000160801	PTH1R	protein_coding	parathyroid hormone 1 receptor	1342.43	10.1065	1.6459e-63	9.5571e-61	0.014658	18.287	4.2479	no
ENSG00000145506	NKD2	protein_coding	NKD inhibitor of WNT signaling pathway 2	180.983	9.8801	2.9303e-13	2.1367e-11	0	5.1352	2.585	no
ENSG00000276920	NKD2	protein_coding	NKD inhibitor of WNT signaling pathway 2	180.983	9.8801	2.9303e-13	2.1367e-11	0	5.1352	2.585	no
ENSG00000104435	STMN2	protein_coding	stathmin 2	1740.71	9.8732	6.9905e-86	6.642e-83	0.021967	19.7116	4.3923	no
ENSG00000160808	MYL3	protein_coding	myosin light chain 3	81.1241	9.8373	1.615e-12	1.1154e-10	0	4.4054	2.3219	no
ENSG00000243440	AF165138.7	protein_coding	NA	77.5559	9.7733	2.626e-12	1.7745e-10	0	2.4056	1.585	no
ENSG00000039537	C6	protein_coding	complement C6	926.829	9.5288	3.8364e-11	2.3494e-09	0.0079764	10.4761	3.4594	no
ENSG00000259675	RP11-507B12.1	lincRNA	NA	61.1744	9.4307	4.8109e-11	2.9121e-09	0	11.3846	3.585	no
ENSG00000112936	C7	protein_coding	complement C7	3499.78	8.8479	1.361e-09	7.3703e-08	0.0607	19.6795	4.3923	yes
ENSG00000129988	LBP	protein_coding	lipopolysaccharide binding protein	1014.57	8.7271	1.8978e-75	1.3224e-72	0.0508	14.1598	3.9069	yes
ENSG00000133048	CHI3L1	protein_coding	chitinase 3 like 1	28631.7	8.6068	0	0	1.2024	482.048	7.9159	yes
ENSG00000130203	APOE	protein_coding	apolipoprotein E	16088.4	8.4532	6.5222e-145	1.3634e-141	0.9572	503.694	7.9801	yes
ENSG00000254883	RP11-655M14.14	processed_pseudogene	NA	25.3374	8.1607	2.0825e-07	9.0063e-06	0	5.5281	2.8074	no
ENSG00000130595	TNNT3	protein_coding	troponin T3, fast skeletal type	63.7416	7.8161	1.4009e-09	7.5603e-08	0	4.1085	2.3219	yes
ENSG00000227925	RP11-191N8.2	lincRNA	NA	18.9875	7.7418	2.8095e-06	0.00010339	0	2.4525	1.585	no
ENSG00000224646	AC007387.2	processed_pseudogene	ribosomal protein S28 pseudogene 5	18.1619	7.68	7.0141e-06	0.00024573	0	8.9795	3.3219	no
ENSG00000117594	HSD11B1	protein_coding	hydroxysteroid 11-beta dehydrogenase 1	728.624	7.6777	1.0367e-13	7.6667e-12	0.0519	13.6727	3.9069	yes
ENSG00000112782	CLIC5	protein_coding	chloride intracellular channel 5	141.485	7.629	1.9601e-19	2.1339e-17	0.008459	2.3596	1.585	no
ENSG00000149131	SERPING1	protein_coding	serpin family G member 1	29321.9	7.5755	0	0	2.5236	436.68	6.7748	yes
ENSG00000108551	RASD1	protein_coding	ras related dexamethasone induced 1	6372.27	7.5685	1.5796e-17	1.5575e-15	0.7186	100.789	5.6724	yes
ENSG00000267653	RP1-193H18.3	lincRNA	NA	153.649	7.3648	1.6686e-20	1.9164e-18	0	11.3468	3.585	no
ENSG00000261701	HPR	protein_coding	haptoglobin-related protein	1533.86	7.2832	7.5367e-12	4.9438e-10	0.1023	47.0912	5.585	no
ENSG00000145358	DDIT4L	protein_coding	DNA damage inducible transcript 4 like	4399.19	7.2214	1.3639e-234	8.5528e-231	0.3034	43.6562	5.4919	yes
ENSG00000259194	RP11-108K3.4	sense_intronic	NA	12.9304	7.1884	7.5849e-05	0.0022394	0	6.6802	3	no
ENSG00000099869	IGF2-AS	antisense	IGF2 antisense RNA	203.556	7.1425	2.8408e-25	4.1048e-23	0.017123	2.3743	1.585	no
ENSG00000211445	GPX3	protein_coding	glutathione peroxidase 3	18698.9	7.085	2.5989e-212	1.3582e-208	2.7454	383.209	6.585	yes
ENSG00000270378	RP11-108K3.5	processed_pseudogene	NA	11.9474	7.076	0.00016585	0.0046142	0	3.1835	2	no
ENSG00000017427	IGF1	protein_coding	insulin like growth factor 1	214.626	7.0189	2.3549e-17	2.2719e-15	0.0788	3.8495	2.3219	no
ENSG00000186417	GLDN	protein_coding	gliomedin	1146.08	6.9989	1.2128e-113	1.6534e-110	0.0574	6.8554	3	no
ENSG00000123689	G0S2	protein_coding	G0/G1 switch 2	453.078	6.9872	2.9143e-56	1.3638e-53	0.1229	16.0362	4.0875	yes
ENSG00000124249	KCNK15	protein_coding	potassium two pore domain channel subfamily K member 15	268.336	6.8174	9.3101e-35	2.1001e-32	0.012724	2.651	2	yes
ENSG00000118432	CNR1	protein_coding	cannabinoid receptor 1	556.389	6.8133	2.7865e-06	0.00010267	0.03199	3.0635	2	no
ENSG00000113722	CDX1	protein_coding	caudal type homeobox 1	109.593	6.8129	1.2434e-16	1.1171e-14	0.016433	2.3659	1.585	no
ENSG00000115604	IL18R1	protein_coding	interleukin 18 receptor 1	228.722	6.799	2.746e-22	3.4032e-20	0.0664	4.9134	2.585	no
ENSG00000137673	MMP7	protein_coding	matrix metallopeptidase 7	3822.91	6.7	1.6675e-203	6.5354e-200	1.0113	96.9624	5.6147	yes
ENSG00000122176	FMOD	protein_coding	fibromodulin	688.137	6.6837	4.3351e-06	0.00015642	0.0719	5.6337	2.8074	yes
ENSG00000185149	NPY2R	protein_coding	neuropeptide Y receptor Y2	987.674	6.558	4.4511e-65	2.6839e-62	0.0671	6.809	3	no
ENSG00000259747	RP11-275I4.2	lincRNA	NA	27.9337	6.5321	5.8635e-06	0.00020657	3.3256e-06	4.1118	2.3219	no
ENSG00000084674	APOB	protein_coding	apolipoprotein B	17296.9	6.5154	3.7449e-294	3.914e-290	0.3203	29	4.9069	yes
ENSG00000197766	CFD	protein_coding	complement factor D	3803.4	6.4939	1.8231e-103	2.2865e-100	1.1802	96.7526	5.6147	yes
ENSG00000274619	CFD	protein_coding	complement factor D	3803.4	6.4939	1.8231e-103	2.2865e-100	1.1802	96.7526	5.6147	yes
ENSG00000064205	WISP2	protein_coding	cellular communication network factor 5	5977.03	6.4627	8.2012e-194	2.5715e-190	1.0257	92.4358	5.5392	yes
ENSG00000029559	IBSP	protein_coding	integrin binding sialoprotein	754.941	6.4488	3.9994e-76	2.85e-73	0.1878	12.3264	3.7004	yes
ENSG00000260187	RP11-439I14.1	transcribed_processed_pseudogene	NA	25.7743	6.3845	1.458e-05	0.00048325	0	2.8218	2	no
ENSG00000268615	RP11-65J3.15	lincRNA	NA	7.3926	6.3831	0.0025241	0.0529	0	2.3637	1.585	no
ENSG00000229694	LINC00484	lincRNA	long intergenic non-protein coding RNA 484	23.9075	6.3077	3.8258e-05	0.0011912	0	3.2844	2	no
ENSG00000150681	RGS18	protein_coding	regulator of G protein signaling 18	339.82	6.2937	8.5719e-07	3.434e-05	0.0747	4.4109	2.3219	yes
ENSG00000238840	U8	snoRNA	NA	26.3923	6.2899	1.7416e-05	0.00057181	0	10.0112	3.4594	no
ENSG00000154153	FAM134B	protein_coding	reticulophagy regulator 1	1873.22	6.2632	1.9118e-11	1.2013e-09	0.2067	22.5581	4.585	yes
ENSG00000254836	RP1-17K7.3	antisense	NA	6.7084	6.2429	0.0036612	0.0731	0	2.1979	1.585	no
ENSG00000223991	AC104809.2	antisense	NA	237.067	6.1676	9.3421e-08	4.233e-06	0.01265	2.4977	1.585	no
ENSG00000169071	ROR2	protein_coding	receptor tyrosine kinase like orphan receptor 2	2018.48	6.0493	2.3467e-60	1.2909e-57	0.1467	13.7416	3.9069	yes
ENSG00000237949	LINC00844	lincRNA	NA	39.7312	6.0217	2.0874e-07	9.0153e-06	0	3.6747	2.3219	yes
ENSG00000169031	COL4A3	protein_coding	collagen type IV alpha 3 chain	1532.53	5.9935	1.7145e-12	1.1815e-10	0.234	12.8939	3.8074	yes
ENSG00000166819	PLIN1	protein_coding	perilipin 1	527.217	5.9687	8.325e-34	1.8254e-31	0.0546	4.5338	2.585	no
ENSG00000138135	CH25H	protein_coding	cholesterol 25-hydroxylase	203.172	5.9669	9.1398e-26	1.3582e-23	0.0682	3.0213	2	yes
ENSG00000094963	FMO2	protein_coding	flavin containing dimethylaniline monoxygenase 2	4585.2	5.9466	5.2627e-178	1.5001e-174	0.5012	27.3473	3.8074	yes
ENSG00000081052	COL4A4	protein_coding	collagen type IV alpha 4 chain	7544.7	5.8544	4.1231e-241	3.232e-237	0.302	16.2846	4.0875	yes
ENSG00000101938	CHRDL1	protein_coding	chordin like 1	35970.1	5.8537	2.9009e-121	4.3314e-118	5.8534	295.39	5.4021	yes
ENSG00000109819	PPARGC1A	protein_coding	PPARG coactivator 1 alpha	403.999	5.8051	9.7377e-31	1.8732e-28	0.040723	2.3009	1.585	no
ENSG00000213088	ACKR1	protein_coding	atypical chemokine receptor 1 (Duffy blood group)	6811.42	5.7836	7.5394e-147	1.6886e-143	1.9127	101.79	5.1015	yes
ENSG00000253549	CA3-AS1	antisense	NA	201.671	5.7568	8.7644e-27	1.3672e-24	0.5628	18.1423	3.2479	no
ENSG00000273259	SERPINA3	protein_coding	NA	2279.81	5.72	3.6253e-14	2.7325e-12	0.6151	36.3151	4.2095	yes
ENSG00000137745	MMP13	protein_coding	matrix metallopeptidase 13	719.646	5.7083	1.9727e-08	9.7103e-07	0.1947	7.7632	3.1699	yes
ENSG00000122121	XPNPEP2	protein_coding	X-prolyl aminopeptidase 2	566.098	5.6896	0.0010554	0.024438	0.1123	5.2591	2.585	no
ENSG00000254403	OR10Y1P	unprocessed_pseudogene	olfactory receptor family 10 subfamily Y member 1 pseudogene	101.43	5.6176	3.0106e-13	2.1902e-11	0.0645	3.6103	2.3219	no
ENSG00000069482	GAL	protein_coding	galanin and GMAP prepropeptide	141.401	5.606	7.949e-20	8.9655e-18	0.1873	6.7614	3	no
ENSG00000124212	PTGIS	protein_coding	prostaglandin I2 synthase	4683.8	5.5679	5.7239e-141	1.1217e-137	0.4964	22.1666	4.5236	yes
ENSG00000187260	WDR86	protein_coding	WD repeat domain 86	481.733	5.5255	5.9283e-51	2.4784e-48	0.2032	9.4439	3.3219	yes
ENSG00000196136	SERPINA3	protein_coding	serpin family A member 3	767.503	5.5231	9.8745e-53	4.2413e-50	0.2989	12.2878	3.7004	yes
ENSG00000151892	GFRA1	protein_coding	GDNF family receptor alpha 1	3556.87	5.4982	1.0976e-56	5.2945e-54	0.2512	12.1384	3.7004	yes
ENSG00000162706	CADM3	protein_coding	cell adhesion molecule 3	71265.7	5.4704	3.7781e-148	9.1124e-145	10.7728	454.009	5.2448	yes
ENSG00000163520	FBLN2	protein_coding	fibulin 2	8512.4	5.4138	2.043e-79	1.5624e-76	1.2829	49.4989	4.6439	yes
ENSG00000066468	FGFR2	protein_coding	fibroblast growth factor receptor 2	373.121	5.3857	3.3985e-30	6.2683e-28	0.0688	2.4867	1.585	no
ENSG00000162849	KIF26B	protein_coding	kinesin family member 26B	4790.47	5.354	4.5161e-82	3.8271e-79	0.2254	8.4338	3.1699	yes
ENSG00000125730	C3	protein_coding	complement C3	25039.9	5.3292	6.3526e-212	2.8455e-208	4.1459	155.861	4.9727	yes
ENSG00000115252	PDE1A	protein_coding	phosphodiesterase 1A	2720.5	5.3136	1.9951e-139	3.6798e-136	0.5957	22.6977	3.585	yes
ENSG00000131386	GALNT15	protein_coding	polypeptide N-acetylgalactosaminyltransferase 15	22181.4	5.2875	7.4167e-117	1.0571e-113	3.2116	112.521	4.8329	yes
ENSG00000173376	NDNF	protein_coding	neuron derived neurotrophic factor	3035.97	5.2768	3.4067e-69	2.1363e-66	0.7235	24.491	3.6439	yes
ENSG00000249242	TMEM150C	protein_coding	transmembrane protein 150C	2449.31	5.2564	3.6901e-06	0.00013438	0.3704	28.5053	4.9069	yes
ENSG00000112796	ENPP5	protein_coding	ectonucleotide pyrophosphatase/phosphodiesterase family member 5	927.703	5.2144	3.4664e-55	1.5752e-52	0.1675	7.9174	3.1699	yes
ENSG00000137869	CYP19A1	protein_coding	cytochrome P450 family 19 subfamily A member 1	3488.68	5.2112	4.2173e-91	4.4078e-88	1.403	43.9326	4.4919	no
ENSG00000222552	RNA5SP60	rRNA	RNA, 5S ribosomal pseudogene 60	18.9587	5.1855	0.00057322	0.01431	0	6.5405	3	yes
ENSG00000154736	ADAMTS5	protein_coding	ADAM metallopeptidase with thrombospondin type 1 motif 5	2816.68	5.1806	5.9261e-126	9.7797e-123	0.1693	6.4126	2.8074	yes
ENSG00000115590	IL1R2	protein_coding	interleukin 1 receptor type 2	448.878	5.1791	3.0204e-05	0.00095467	0.4253	15.1239	4	yes
ENSG00000189221	MAOA	protein_coding	monoamine oxidase A	1550.15	5.1747	1.0638e-31	2.1245e-29	0.1864	10.4216	3.4594	yes
ENSG00000205403	CFI	protein_coding	complement factor I	527.525	5.1658	1.4891e-05	0.00049305	0.1045	6.0325	2.8074	yes
ENSG00000101230	ISM1	protein_coding	isthmin 1	2430.68	5.1609	1.2795e-91	1.3835e-88	0.5808	18.1011	3.2479	no
ENSG00000164112	TMEM155	protein_coding	small integral membrane protein 43	1676.69	5.1307	3.0322e-48	1.1055e-45	1.7754	52.1155	4.143	yes
ENSG00000124749	COL21A1	protein_coding	collagen type XXI alpha 1 chain	2686.13	5.1069	3.5275e-50	1.3826e-47	0.5532	18.8277	3.3219	yes
ENSG00000185885	IFITM1	protein_coding	interferon induced transmembrane protein 1	10377.2	5.1064	5.9866e-80	4.6928e-77	22.7272	675.208	4.8159	yes
ENSG00000138449	SLC40A1	protein_coding	solute carrier family 40 member 1	373.852	5.1017	1.2213e-40	3.359e-38	0.1128	4.0159	2.3219	yes
ENSG00000225670	CADM3-AS1	antisense	NA	1664.23	5.072	6.7543e-49	2.5212e-46	0.3613	9.9252	3.4594	yes
ENSG00000226416	MRPL23-AS1	antisense	MRPL23 antisense RNA 1	192.225	5.0716	1.5404e-19	1.7007e-17	0.0546	2.5915	2	no
ENSG00000226263	ISM1-AS1	antisense	NA	40.494	5.0691	8.5685e-06	0.00029524	0	2.3561	1.585	no
ENSG00000174697	LEP	protein_coding	leptin	978.065	5.0188	1.2224e-43	3.6503e-41	0.2212	6.57	3	yes
ENSG00000104267	CA2	protein_coding	carbonic anhydrase 2	15567.3	5.0107	4.5637e-177	1.1925e-173	8.9825	293.361	4.8777	no
ENSG00000128045	RASL11B	protein_coding	RAS like family 11 member B	203.019	5.0078	0.00099408	0.023144	0.1025	2.5888	2	no
ENSG00000226757	PP12613	antisense	uncharacterized LOC100192379	493.765	4.993	3.7858e-55	1.6958e-52	0.1826	5.3469	2.585	no
ENSG00000265554	RP11-419J16.1	lincRNA	NA	14.3756	4.9827	0.0035338	0.0713	0	2.217	1.585	no
ENSG00000167244	IGF2	protein_coding	insulin like growth factor 2	67284.7	4.9732	1.7669e-84	1.6295e-81	13.5756	422.682	4.821	yes
ENSG00000251301	RP11-81H14.2	lincRNA	long intergenic non-protein coding RNA 2384	470.395	4.9204	7.5806e-51	3.0869e-48	1.2888	36.6375	4.2479	no
ENSG00000262098	CTD-2561B21.10	lincRNA	NA	26.4585	4.9058	2.9772e-05	0.00094293	0.0692	4.4899	2.3219	no
ENSG00000171951	SCG2	protein_coding	secretogranin II	4764.9	4.8778	7.1009e-87	6.9578e-84	1.548	46.6245	4	yes
ENSG00000226925	AC007271.3	antisense	NA	33.1687	4.8743	1.0193e-05	0.00034664	0.193	6.1071	2.8074	no
ENSG00000115919	KYNU	protein_coding	kynureninase	4046.57	4.8287	7.8058e-84	6.9929e-81	0.6839	16.6729	3.1699	no
ENSG00000186407	CD300E	protein_coding	CD300e molecule	786.197	4.8222	5.7358e-57	2.8547e-54	0.1824	5.6509	2.8074	no
ENSG00000165507	C10orf10	protein_coding	DEPP1 autophagy regulator	14836.2	4.8155	1.9597e-56	9.3101e-54	7.126	174.903	4.4594	yes
ENSG00000182853	VMO1	protein_coding	vitelline membrane outer layer 1 homolog	368.575	4.7565	7.8629e-29	1.3621e-26	0.5913	18.0243	3.2479	yes
ENSG00000271447	MMP28	protein_coding	matrix metallopeptidase 28	255.968	4.7564	5.3177e-23	6.7505e-21	0.2341	6.5026	3	yes
ENSG00000134339	SAA2	protein_coding	serum amyloid A2	835.115	4.7362	7.3227e-43	2.1458e-40	1.6808	49.4919	4.0589	yes
ENSG00000111913	FAM65B	protein_coding	RHO family interacting cell polarization regulator 2	562.786	4.7217	3.3856e-38	8.7012e-36	0.1448	2.8526	2	no
ENSG00000204792	LINC01291	lincRNA	long intergenic non-protein coding RNA 1291	132.203	4.632	0.0023061	0.04909	0.3868	8.6667	3.3219	no
ENSG00000235237	RP1-151B14.6	antisense	NA	45.4723	4.6117	2.3564e-06	8.8107e-05	0.0851	2.8616	2	no
ENSG00000158104	HPD	protein_coding	4-hydroxyphenylpyruvate dioxygenase	118.572	4.5956	7.9259e-12	5.156e-10	0.121	2.3966	1.585	no
ENSG00000196616	ADH1B	protein_coding	alcohol dehydrogenase 1B (class I), beta polypeptide	35566.1	4.4943	5.4291e-58	2.8372e-55	13.4226	265.991	4.2533	yes
ENSG00000183690	EFHC2	protein_coding	EF-hand domain containing 2	402.963	4.4901	4.8821e-26	7.4309e-24	0.1223	2.8004	2	no
ENSG00000198624	CCDC69	protein_coding	coiled-coil domain containing 69	4683.22	4.4829	7.6336e-71	4.9865e-68	2.1054	53.3911	4.1699	yes
ENSG00000135821	GLUL	protein_coding	glutamate-ammonia ligase	165012	4.4776	2.6228e-76	1.9125e-73	83.8507	1690.3	4.3143	no
ENSG00000042062	FAM65C	protein_coding	RIPOR family member 3	1797.7	4.4698	1.5388e-07	6.7577e-06	0.5741	23.5823	3.6439	yes
ENSG00000250328	MGC32805	antisense	uncharacterized LOC153163	77.5176	4.4658	4.4296e-07	1.8251e-05	0.2548	3.9538	2.3219	no
ENSG00000225956	RP5-1077I2.3	antisense	NA	32.024	4.4599	4.0516e-05	0.0012553	0.237	3.2937	2	no
ENSG00000107562	CXCL12	protein_coding	C-X-C motif chemokine ligand 12	5815.77	4.4189	7.4156e-53	3.2294e-50	3.5294	63.9747	3.7004	yes
ENSG00000233392	AC104809.4	processed_transcript	up-regulated in colorectal cancer liver metastasis	208.293	4.4039	0.0028289	0.0584	0.0611	4.236	2.3219	no
ENSG00000129757	CDKN1C	protein_coding	cyclin dependent kinase inhibitor 1C	260.467	4.3965	9.7478e-17	8.8082e-15	0.1679	3.5061	2.3219	yes
ENSG00000170891	CYTL1	protein_coding	cytokine like 1	5211.74	4.3896	3.3133e-39	8.7302e-37	7.7231	161.432	4.1699	no
ENSG00000162496	DHRS3	protein_coding	dehydrogenase/reductase 3	2068.32	4.381	6.0079e-47	2.1166e-44	1.3743	24.0698	3.6439	yes
ENSG00000165995	CACNB2	protein_coding	calcium voltage-gated channel auxiliary subunit beta 2	1631.37	4.3678	3.6989e-45	1.1957e-42	0.538	10.7431	2.585	yes
ENSG00000113645	WWC1	protein_coding	WW and C2 domain containing 1	2719.25	4.3619	1.6136e-98	1.807e-95	1.0758	18.0924	3.2479	no
ENSG00000272438	RP11-54O7.16	lincRNA	NA	28.6958	4.3531	1.4538e-05	0.00048236	0.2608	5.5638	2.8074	no
ENSG00000244558	KCNK15-AS1	antisense	NA	34.5894	4.2892	0.0010293	0.023889	0	2.7716	2	yes
ENSG00000272824	RP6-74O6.6	lincRNA	NA	26.1357	4.2695	0.0020398	0.043896	0	2.9108	2	yes
ENSG00000105696	TMEM59L	protein_coding	transmembrane protein 59 like	1109.58	4.2694	5.7288e-24	7.776e-22	1.1287	17.3639	3.1699	no
ENSG00000107317	PTGDS	protein_coding	prostaglandin D2 synthase	2444.89	4.2629	1.1446e-101	1.3803e-98	6.2596	110.733	4	yes
ENSG00000137975	CLCA2	protein_coding	chloride channel accessory 2	430.241	4.2552	3.0033e-18	3.0976e-16	0.115	2.9049	2	yes
ENSG00000108984	MAP2K6	protein_coding	mitogen-activated protein kinase kinase 6	1163.92	4.2551	1.1645e-57	5.9858e-55	0.4856	7.8963	3.1699	yes
ENSG00000077420	APBB1IP	protein_coding	amyloid beta precursor protein binding family B member 1 interacting protein	2117.25	4.2537	3.9272e-81	3.2405e-78	1.0246	18.5555	3.3219	no
ENSG00000103196	CRISPLD2	protein_coding	cysteine rich secretory protein LCCL domain containing 2	22346.7	4.2396	1.9705e-129	3.4326e-126	6.7108	124.809	3.9773	yes
ENSG00000196562	SULF2	protein_coding	sulfatase 2	18050.3	4.2342	4.7067e-101	5.4658e-98	8.4739	164.278	4.1964	yes
ENSG00000270885	RASL10B	protein_coding	RAS like family 10 member B	4043.82	4.234	4.1026e-35	9.7453e-33	1.5545	34.4597	3.5443	yes
ENSG00000064886	CHI3L2	protein_coding	chitinase 3 like 2	1242.61	4.2306	2.2265e-33	4.848e-31	1.5401	30.3113	3.3692	yes
ENSG00000116678	LEPR	protein_coding	leptin receptor	43824.2	4.2278	1.8695e-124	2.9309e-121	12.0587	198.185	3.9362	yes
ENSG00000183644	C11orf88	protein_coding	HOATZ cilia and flagella associated protein	315.135	4.1898	3.3613e-26	5.1412e-24	0.2123	4.1851	2.3219	no
ENSG00000096395	MLN	protein_coding	motilin	40.4544	4.1884	6.1965e-05	0.0018522	0.0587	3.7811	2.3219	no
ENSG00000226012	AP001434.2	lincRNA	NA	30.5477	4.1868	0.0016398	0.036285	0	8.1466	3.1699	no
ENSG00000278843	MMP28	protein_coding	matrix metallopeptidase 28	208.737	4.1865	4.9157e-17	4.5737e-15	0.2658	3.5601	2.3219	yes
ENSG00000135929	CYP27A1	protein_coding	cytochrome P450 family 27 subfamily A member 1	2426.62	4.1797	1.3326e-45	4.5416e-43	1.7962	28.6537	3.3219	yes
ENSG00000255364	RP11-94A24.1	lincRNA	NA	3169.7	4.1792	2.5811e-44	8.0129e-42	12.858	245.456	4.1352	yes
ENSG00000163975	MELTF	protein_coding	melanotransferrin	3165.21	4.1744	2.2273e-46	7.6744e-44	1.9827	41.7111	3.8413	yes
ENSG00000204103	MAFB	protein_coding	MAF bZIP transcription factor B	316.363	4.1565	9.9502e-27	1.5445e-24	0.1369	2.111	1.585	yes
ENSG00000169242	EFNA1	protein_coding	ephrin A1	350.364	4.1498	5.6512e-25	8.0542e-23	0.3991	8.0296	3.1699	yes
ENSG00000215483	LINC00598	lincRNA	long intergenic non-protein coding RNA 548	588.183	4.136	3.462e-21	4.0504e-19	1.0988	18.2481	3.2479	yes
ENSG00000234431	AC007283.5	3prime_overlapping_ncRNA	NA	39.6928	4.1213	0.0026363	0.0549	0.0678	5.6757	2.8074	no
ENSG00000185924	RTN4RL1	protein_coding	reticulon 4 receptor like 1	321.018	4.1208	6.6826e-17	6.1628e-15	0.073	2.1294	1.585	yes
ENSG00000250722	SEPP1	protein_coding	selenoprotein P	615.941	4.1194	1.8539e-17	1.8109e-15	0.4755	8.4356	3.1699	yes
ENSG00000135917	SLC19A3	protein_coding	solute carrier family 19 member 3	212.549	4.1141	9.0884e-17	8.284e-15	0.2672	5.1577	2.585	no
ENSG00000041353	RAB27B	protein_coding	RAB27B, member RAS oncogene family	8175.65	4.0891	9.0046e-44	2.7148e-41	1.713	31.6449	3.4594	yes
ENSG00000119915	ELOVL3	protein_coding	ELOVL fatty acid elongase 3	402.839	4.0478	8.5606e-26	1.2782e-23	0.4624	7.5901	3.1699	yes
ENSG00000243137	PSG4	protein_coding	pregnancy specific beta-1-glycoprotein 4	3354.29	4.0337	1.032e-32	2.1716e-30	4.3319	60.4925	3.6088	yes
ENSG00000221390	MIR1295A	miRNA	microRNA 1295a	62.4772	4.0241	9.4069e-06	0.0003213	2.7595	30.6026	3	no
ENSG00000137193	PIM1	protein_coding	Pim-1 proto-oncogene, serine/threonine kinase	4495.19	4.0129	6.4607e-70	4.1342e-67	2.7082	40.1023	3.3576	yes
ENSG00000137101	CD72	protein_coding	CD72 molecule	253.771	3.9985	4.8819e-11	2.9494e-09	0.4068	5.9363	2.8074	no
ENSG00000169218	RSPO1	protein_coding	R-spondin 1	498.19	3.9745	4.6646e-21	5.397e-19	0.2085	4.328	2.3219	yes
ENSG00000249364	RP11-434D9.1	lincRNA	uncharacterized LOC101928858	49.9924	3.9735	0.0001524	0.0042665	0.1223	2.0678	1.585	no
ENSG00000104953	TLE6	protein_coding	TLE family member 6, subcortical maternal complex member	249.098	3.9503	1.3973e-09	7.5538e-08	0.4818	9.5617	3.4594	yes
ENSG00000265972	TXNIP	protein_coding	thioredoxin interacting protein	74530.1	3.9461	4.4073e-61	2.4677e-58	42.2107	600.921	3.8074	yes
ENSG00000243829	CTB-33G10.1	processed_pseudogene	ribosomal protein S9 pseudogene 4	41.0692	3.904	0.0002813	0.0074875	0.1901	2.6734	2	no
ENSG00000159403	C1R	protein_coding	complement C1r	19270.6	3.9027	3.0567e-83	2.6623e-80	21.489	298.356	3.7646	yes
ENSG00000117643	MAN1C1	protein_coding	mannosidase alpha class 1C member 1	730.745	3.9008	1.9774e-24	2.7679e-22	0.4258	5.2324	2.585	yes
ENSG00000253154	CTA-392E5.1	lincRNA	NA	128.906	3.8826	5.7791e-15	4.5875e-13	0.7522	10.2844	2.4594	no
ENSG00000246985	SOCS2-AS1	processed_transcript	SOCS2 antisense RNA 1	618.365	3.8732	1.9423e-35	4.6489e-33	0.6384	8.2543	2.1699	no
ENSG00000272482	RP11-474O21.5	lincRNA	NA	27.9604	3.8595	0.00018856	0.0052207	0.403	5.1931	2.585	no
ENSG00000228221	LINC00578	lincRNA	long intergenic non-protein coding RNA 578	69.7606	3.8518	4.3148e-05	0.0013264	0.4086	5.2604	2.585	yes
ENSG00000131979	GCH1	protein_coding	GTP cyclohydrolase 1	1288.44	3.8285	3.8258e-58	2.0332e-55	0.7824	10.9094	2.585	yes
ENSG00000266970	RP11-806H10.4	lincRNA	uncharacterized LOC101928674	117.895	3.8181	8.6568e-11	5.1214e-09	0.4336	6.9484	3	no
ENSG00000234459	AC002064.4	antisense	NA	106.879	3.8175	9.1426e-07	3.6241e-05	1.6443	30.1304	3.3692	no
ENSG00000186081	KRT5	protein_coding	keratin 5	271.772	3.8064	9.76e-24	1.2967e-21	0.6457	9.1633	2.3219	no
ENSG00000139832	RAB20	protein_coding	RAB20, member RAS oncogene family	368.461	3.7925	1.45e-31	2.8776e-29	0.4777	6.0363	2.8074	no
ENSG00000156804	FBXO32	protein_coding	F-box protein 32	15419.5	3.7758	2.5079e-73	1.7095e-70	15.6956	204.105	3.592	yes
ENSG00000120833	SOCS2	protein_coding	suppressor of cytokine signaling 2	1912.17	3.7554	2.9234e-32	6.0305e-30	1.7736	25.2193	3.1155	no
ENSG00000120837	NFYB	protein_coding	nuclear transcription factor Y subunit beta	13746.1	3.749	1.0431e-67	6.413e-65	11.7398	157.458	3.6033	yes
ENSG00000253968	CTB-32H22.1	lincRNA	NA	54.5548	3.7378	0.00064594	0.015825	0.1649	4.3112	2.3219	no
ENSG00000236882	LINC01554	lincRNA	long intergenic non-protein coding RNA 1554	128.469	3.7233	9.4996e-14	7.0583e-12	0.1858	2.4079	1.585	no
ENSG00000130208	APOC1	protein_coding	apolipoprotein C1	116.115	3.7158	5.6727e-11	3.3944e-09	0.7096	7.9479	2.1699	yes
ENSG00000189001	SBSN	protein_coding	suprabasin	132.762	3.7035	4.0053e-08	1.8942e-06	0.2118	2.0601	1.585	no
ENSG00000180447	GAS1	protein_coding	growth arrest specific 1	57052.9	3.7024	1.0068e-49	3.8035e-47	33.3282	394.951	3.5419	yes
ENSG00000126860	EVI2A	protein_coding	ecotropic viral integration site 2A	2911.14	3.695	8.5215e-49	3.1434e-46	2.9087	37.2057	3.2479	yes
ENSG00000256040	PAPPA-AS1	antisense	PAPPA antisense RNA 1	1314.89	3.6862	8.8068e-18	8.7942e-16	1.1002	10.6964	2.585	no
ENSG00000104043	ATP8B4	protein_coding	ATPase phospholipid transporting 8B4 (putative)	549.027	3.6756	1.9255e-23	2.5156e-21	0.2623	3.7825	2.3219	yes
ENSG00000230333	AC004538.3	processed_transcript	NA	368.663	3.649	5.5802e-24	7.6073e-22	1.9396	26.6397	3.2224	yes
ENSG00000069431	ABCC9	protein_coding	ATP binding cassette subfamily C member 9	2247.05	3.6434	1.0879e-38	2.8426e-36	0.5586	7.2302	2	yes
ENSG00000136859	ANGPTL2	protein_coding	angiopoietin like 2	6194.97	3.6427	2.9952e-41	8.4608e-39	6.4283	71.4603	3.3626	yes
ENSG00000259407	RP11-158M2.3	antisense	NA	95.6081	3.6383	2.2603e-06	8.5081e-05	0.1297	2.682	2	no
ENSG00000196611	MMP1	protein_coding	matrix metallopeptidase 1	542.922	3.6252	0.0041027	0.0809	0.4328	6.2971	2.8074	yes
ENSG00000205221	VIT	protein_coding	vitrin	2314.84	3.6157	2.9762e-50	1.1812e-47	2.8085	33.4126	3.0875	yes
ENSG00000230435	AC004160.4	antisense	NA	49.1508	3.6152	1.2028e-05	0.00040422	0.3349	3.3455	2	no
ENSG00000244757	RP11-45A16.4	antisense	NA	68.6309	3.613	9.8996e-08	4.447e-06	0.2599	2.9822	2	no
ENSG00000151692	RNF144A	protein_coding	ring finger protein 144A	2378.02	3.5848	6.5201e-33	1.3813e-30	0.7145	9.1571	2.3219	yes
ENSG00000221826	PSG3	protein_coding	pregnancy specific beta-1-glycoprotein 3	184.672	3.5803	3.1413e-07	1.3239e-05	0.2251	2.6559	2	no
ENSG00000150907	FOXO1	protein_coding	forkhead box O1	10076.3	3.5714	5.2571e-72	3.5071e-69	3.6369	38.9384	3	yes
ENSG00000113916	BCL6	protein_coding	BCL6 transcription repressor	28309.3	3.5573	3.5543e-79	2.6535e-76	26.2523	291.964	3.4399	yes
ENSG00000204941	PSG5	protein_coding	pregnancy specific beta-1-glycoprotein 5	986.1	3.5484	1.4281e-42	4.1461e-40	1.5753	17.7264	2.663	yes
ENSG00000145934	TENM2	protein_coding	teneurin transmembrane protein 2	776.572	3.5421	2.7267e-16	2.3359e-14	0.2504	2.3036	1.585	yes
ENSG00000254731	CTD-2005H7.1	lincRNA	NA	28.4666	3.5366	0.0019307	0.042097	0.3944	3.325	2	no
ENSG00000091129	NRCAM	protein_coding	neuronal cell adhesion molecule	10904.2	3.5341	8.4245e-45	2.6954e-42	4.3689	50.8397	3.3785	yes
ENSG00000137285	TUBB2B	protein_coding	tubulin beta 2B class IIb	646.041	3.5262	2.8424e-31	5.6053e-29	0.6946	8.2041	2.1699	yes
ENSG00000140285	FGF7	protein_coding	fibroblast growth factor 7	34187	3.4986	3.1548e-40	8.6015e-38	36.308	374.147	3.3413	yes
ENSG00000062282	DGAT2	protein_coding	diacylglycerol O-acyltransferase 2	563.367	3.4838	3.0558e-13	2.2179e-11	0.5023	4.8656	1.585	no
ENSG00000242337	TFP1	transcribed_unprocessed_pseudogene	NA	57.8005	3.4826	0.00084577	0.020121	0.2468	2.4446	1.585	no
ENSG00000107968	MAP3K8	protein_coding	mitogen-activated protein kinase kinase kinase 8	609.797	3.4774	1.6016e-14	1.2278e-12	0.9005	9.0676	2.3219	yes
ENSG00000138061	CYP1B1	protein_coding	cytochrome P450 family 1 subfamily B member 1	194651	3.4672	6.1577e-64	3.6429e-61	77.1944	840.324	3.4306	yes
ENSG00000170989	S1PR1	protein_coding	sphingosine-1-phosphate receptor 1	1159.69	3.4494	3.1894e-27	5.1548e-25	0.8669	9.81	2.4594	no
ENSG00000173432	SAA1	protein_coding	serum amyloid A1	1401.85	3.4472	1.2891e-19	1.4286e-17	8.2001	102.597	3.5305	yes
ENSG00000121552	CSTA	protein_coding	cystatin A	146.825	3.4405	2.6811e-06	9.9017e-05	0.3765	6.6584	3	yes
ENSG00000170873	MTSS1	protein_coding	MTSS I-BAR domain containing 1	4740.36	3.4352	1.3647e-39	3.6572e-37	4.5678	50.4777	3.0875	yes
ENSG00000258545	RHOXF1-AS1	antisense	RHOXF1 antisense RNA 1	1964.91	3.4323	2.0881e-38	5.4109e-36	4.3968	44.2017	3.1699	yes
ENSG00000057657	PRDM1	protein_coding	PR/SET domain 1	736.682	3.4295	9.876e-23	1.2386e-20	0.616	5.9942	1.8074	no
ENSG00000214140	PRCD	protein_coding	photoreceptor disc component	340.988	3.4285	1.0085e-18	1.0611e-16	1.1757	12.3546	2.7004	no
ENSG00000228804	RP11-211G3.3	antisense	hCG1645011-like	45.3203	3.424	0.0013507	0.030533	0.225	2.7928	2	no
ENSG00000266714	MYO15B	protein_coding	myosin XVB	387.45	3.4212	1.9533e-16	1.6826e-14	1.5576	14.7027	2.415	yes
ENSG00000259846	RP11-467L24.1	lincRNA	NA	103.386	3.4057	1.5995e-09	8.6024e-08	0.7464	7.7107	2.1699	no
ENSG00000278266	RP11-575F12.3	lincRNA	NA	383.323	3.4006	9.5523e-17	8.6564e-15	0.2623	2.7378	2	no
ENSG00000161544	CYGB	protein_coding	cytoglobin	3031.02	3.3892	9.5595e-36	2.3417e-33	4.6826	44.5133	2.9386	yes
ENSG00000171388	APLN	protein_coding	apelin	1571.84	3.3782	2.8252e-45	9.4239e-43	1.0371	10.3803	2.4594	no
ENSG00000221866	PLXNA4	protein_coding	plexin A4	4321.76	3.3741	9.4225e-57	4.6163e-54	0.8383	7.5024	2.1699	no
ENSG00000166482	MFAP4	protein_coding	microfibril associated protein 4	3134.88	3.3663	7.2774e-42	2.0934e-39	4.3986	44.3994	3.1699	yes
ENSG00000113594	LIFR	protein_coding	LIF receptor subunit alpha	18615	3.3553	1.189e-44	3.7282e-42	6.2112	49.9793	2.8651	no
ENSG00000122035	RASL11A	protein_coding	RAS like family 11 member A	900.636	3.347	7.8417e-26	1.1764e-23	1.6344	14.7531	2.415	yes
ENSG00000130303	BST2	protein_coding	bone marrow stromal cell antigen 2	206.132	3.332	5.648e-15	4.4948e-13	0.6804	6.2639	1.8074	yes
ENSG00000154856	APCDD1	protein_coding	APC down-regulated 1	1057.15	3.3265	1.879e-29	3.3859e-27	1.2382	11.2286	2.585	no
ENSG00000235020	RP11-109I13.2	processed_transcript	NA	80.8794	3.3235	1.0689e-06	4.1998e-05	0.506	5.3497	1.585	yes
ENSG00000130066	SAT1	protein_coding	spermidine/spermine N1-acetyltransferase 1	25709.9	3.3179	7.349e-41	2.0574e-38	73.0877	677.246	3.1957	no
ENSG00000054938	CHRDL2	protein_coding	chordin like 2	58.2111	3.3143	0.0044378	0.0863	0.3942	2.3012	1.585	yes
ENSG00000142583	SLC2A5	protein_coding	solute carrier family 2 member 5	940.268	3.3119	5.1247e-35	1.1991e-32	0.7852	6.6561	2	yes
ENSG00000184557	SOCS3	protein_coding	suppressor of cytokine signaling 3	5977.9	3.3104	5.308e-29	9.2978e-27	5.193	50.7331	3.1155	yes
ENSG00000006016	CRLF1	protein_coding	cytokine receptor like factor 1	3690.62	3.3103	4.8974e-33	1.0518e-30	8.8832	78.2857	2.9819	yes
ENSG00000133321	RARRES3	protein_coding	phospholipase A and acyltransferase 4	328.098	3.3099	4.4268e-17	4.1433e-15	1.4684	14.1361	2.9069	yes
ENSG00000241358	RP11-758I14.3	transcribed_processed_pseudogene	NA	89.4436	3.3027	0.0010715	0.024758	0.4544	4.2962	2.3219	no
ENSG00000028137	TNFRSF1B	protein_coding	TNF receptor superfamily member 1B	1299.94	3.296	2.9319e-45	9.6712e-43	0.9354	8.6555	2.3219	yes
ENSG00000266088	RP5-1028K7.2	lincRNA	NA	690.197	3.2953	1.8298e-16	1.5893e-14	2.2207	21.136	2.8745	no
ENSG00000233901	LINC01503	lincRNA	long intergenic non-protein coding RNA 1503	746.492	3.2913	6.6827e-31	1.2934e-28	3.782	35.2483	2.848	yes
ENSG00000170345	FOS	protein_coding	Fos proto-oncogene, AP-1 transcription factor subunit	951.502	3.2857	8.505e-29	1.4652e-26	1.2704	11.8851	2.7004	yes
ENSG00000105516	DBP	protein_coding	D-box binding PAR bZIP transcription factor	584.578	3.2797	2.5901e-21	3.0531e-19	0.8227	6.3612	1.8074	yes
ENSG00000106823	ECM2	protein_coding	extracellular matrix protein 2	6586.82	3.2753	1.6346e-16	1.4437e-14	4.5644	58.239	3.2977	yes
ENSG00000077942	FBLN1	protein_coding	fibulin 1	249621	3.2709	1.8671e-36	4.6834e-34	258.681	2474.63	3.2514	yes
ENSG00000179593	ALOX15B	protein_coding	arachidonate 15-lipoxygenase type B	807.992	3.2709	2.1553e-28	3.6727e-26	0.7107	6.3499	1.8074	no
ENSG00000170458	CD14	protein_coding	CD14 molecule	471.343	3.2692	9.3996e-13	6.6082e-11	1.1305	9.0938	2.3219	yes
ENSG00000155792	DEPTOR	protein_coding	DEP domain containing MTOR interacting protein	823.262	3.2624	3.3871e-32	6.9413e-30	0.9048	7.1568	2	yes
ENSG00000250934	RP11-71E19.1	lincRNA	NA	60.1111	3.2422	0.0026102	0.0546	0.8208	5.3737	1.585	no
ENSG00000237413	MGC27382	processed_transcript	uncharacterized MGC27382	433.601	3.2371	9.6319e-20	1.0825e-17	0.6752	5.3701	1.585	yes
ENSG00000078114	NEBL	protein_coding	nebulette	384.802	3.2239	1.2475e-16	1.1176e-14	0.3748	3.8166	2.3219	yes
ENSG00000121361	KCNJ8	protein_coding	potassium inwardly rectifying channel subfamily J member 8	1921.47	3.2224	3.9074e-16	3.3112e-14	2.1401	18.7553	2.737	yes
ENSG00000267414	RP11-456K23.1	lincRNA	SETBP1 divergent transcript	218.59	3.2216	1.2122e-12	8.4464e-11	0.2295	2.3181	1.585	no
ENSG00000175538	KCNE3	protein_coding	potassium voltage-gated channel subfamily E regulatory subunit 3	332.639	3.2211	3.3818e-16	2.8814e-14	0.521	4.3028	1.3219	no
ENSG00000273694	U2	snRNA	NA	86.0163	3.2161	4.4711e-05	0.0013691	5.5696	38.6783	2.5146	no
ENSG00000165029	ABCA1	protein_coding	ATP binding cassette subfamily A member 1	8491.1	3.2121	5.2418e-24	7.1771e-22	2.5246	18.4922	2.2479	yes
ENSG00000196189	SEMA4A	protein_coding	semaphorin 4A	313.134	3.2106	1.1752e-12	8.2068e-11	0.5391	3.284	1	no
ENSG00000143512	HHIPL2	protein_coding	HHIP like 2	131.207	3.2036	4.3497e-09	2.2618e-07	0.1983	2.1505	1.585	no
ENSG00000041982	TNC	protein_coding	tenascin C	126459	3.1957	1.537e-57	7.7729e-55	46.5155	421.382	3.1361	no
ENSG00000099998	GGT5	protein_coding	gamma-glutamyltransferase 5	41349.1	3.1875	9.597e-26	1.4194e-23	63.2785	546.381	3.0954	yes
ENSG00000256001	RP11-575F12.2	lincRNA	uncharacterized LOC107984450	95.4885	3.184	8.4275e-06	0.00029102	1.6208	10.7696	2	no
ENSG00000102802	MEDAG	protein_coding	mesenteric estrogen dependent adipogenesis	9154.99	3.1792	1.1661e-35	2.8343e-33	10.2615	87.8124	3.0163	yes
ENSG00000198732	SMOC1	protein_coding	SPARC related modular calcium binding 1	1914.89	3.1746	1.0618e-30	2.0301e-28	1.9648	18.1083	2.663	yes
ENSG00000143196	DPT	protein_coding	dermatopontin	1131.43	3.1724	2.6529e-14	2.0239e-12	1.5382	15.9339	2.5025	yes
ENSG00000273824	RP11-81H14.1	lincRNA	NA	120.606	3.1645	1.322e-06	5.1112e-05	0.1869	2.13	1.585	no
ENSG00000205176	REXO1L1P	transcribed_processed_pseudogene	NA	1065.11	3.162	1.7115e-17	1.6823e-15	0.3709	3.6824	2.3219	no
ENSG00000122420	PTGFR	protein_coding	prostaglandin F receptor	11091.8	3.1577	1.2608e-55	5.8135e-53	5.7903	48.4613	2.8074	yes
ENSG00000182752	PAPPA	protein_coding	pappalysin 1	18993.2	3.152	6.9269e-50	2.6814e-47	4.6057	36.07	2.6245	yes
ENSG00000137834	SMAD6	protein_coding	SMAD family member 6	947.878	3.1487	1.4434e-16	1.2785e-14	0.6542	4.4877	1.3219	yes
ENSG00000120875	DUSP4	protein_coding	dual specificity phosphatase 4	1543.21	3.1426	2.9526e-24	4.0605e-22	0.7144	5.9338	1.8074	yes
ENSG00000145284	SCD5	protein_coding	stearoyl-CoA desaturase 5	7162.93	3.1404	1.3174e-47	4.694e-45	6.4254	53.7978	2.974	yes
ENSG00000138207	RBP4	protein_coding	retinol binding protein 4	277.245	3.1337	4.777e-08	2.249e-06	0.9787	6.9573	2	yes
ENSG00000163746	PLSCR2	protein_coding	phospholipid scramblase 2	292.599	3.1247	1.408e-07	6.2356e-06	0.6539	7.2593	2	yes
ENSG00000111341	MGP	protein_coding	matrix Gla protein	108.855	3.1187	4.1301e-07	1.713e-05	0.3983	2.4675	1.585	yes
ENSG00000266405	CBX3P2	transcribed_processed_pseudogene	chromobox 3 pseudogene 2	128.439	3.1185	5.3526e-08	2.5049e-06	0.2811	2.3454	1.585	no
ENSG00000134363	FST	protein_coding	follistatin	1334.17	3.1093	1.9299e-22	2.4013e-20	1.7627	15.1708	2.415	yes
ENSG00000152217	SETBP1	protein_coding	SET binding protein 1	863.58	3.1089	4.5303e-13	3.2505e-11	0.4315	4.2261	2.3219	no
ENSG00000231007	CDC20P1	processed_pseudogene	cell division cycle 20 pseudogene 1	132.7	3.1076	1.0255e-08	5.1698e-07	0.2649	2.1468	1.585	no
ENSG00000182326	C1S	protein_coding	complement C1s	42487.2	3.1015	4.8972e-48	1.765e-45	55.5264	439.985	2.9517	yes
ENSG00000120899	PTK2B	protein_coding	protein tyrosine kinase 2 beta	8549.11	3.0949	1.4886e-22	1.8596e-20	7.1087	71.4737	3.1699	yes
ENSG00000124875	CXCL6	protein_coding	C-X-C motif chemokine ligand 6	4476.96	3.0886	2.6292e-41	7.4945e-39	11.5156	92.9745	2.8541	no
ENSG00000122861	PLAU	protein_coding	plasminogen activator, urokinase	18513.2	3.0863	5.8863e-35	1.3571e-32	22.5708	174.943	2.8745	yes
ENSG00000226872	AC002472.11	antisense	NA	45.9162	3.0839	0.00070646	0.017185	0.4132	3.1178	2	no
ENSG00000002933	TMEM176A	protein_coding	transmembrane protein 176A	269.821	3.0832	6.8271e-09	3.4978e-07	0.9191	7.2208	2	no
ENSG00000145287	PLAC8	protein_coding	placenta associated 8	152.214	3.0767	2.3576e-06	8.8107e-05	0.414	3.1775	2	yes
ENSG00000249736	RP11-83M16.5	lincRNA	long intergenic non-protein coding RNA 2242	51.2278	3.0759	0.0015071	0.033802	0.2563	2.96	2	no
ENSG00000099994	SUSD2	protein_coding	sushi domain containing 2	7134.6	3.0735	2.0212e-21	2.3915e-19	6.5295	49.2123	2.6439	yes
ENSG00000152154	TMEM178A	protein_coding	transmembrane protein 178A	1240.01	3.0582	2.9633e-17	2.8327e-15	2.5768	24.8171	2.7004	yes
ENSG00000205236	RP11-514P8.6	protein_coding	NA	385.398	3.0499	1.1194e-10	6.5975e-09	0.3369	2.2624	1.585	yes
ENSG00000173918	C1QTNF1	protein_coding	C1q and TNF related 1	3436.9	3.0443	5.2703e-35	1.2241e-32	4.4729	38.1567	2.9635	yes
ENSG00000007933	FMO3	protein_coding	flavin containing dimethylaniline monoxygenase 3	15045.3	3.0424	6.3343e-28	1.0564e-25	24.9894	181.794	2.8153	yes
ENSG00000229960	RP11-278H7.4	lincRNA	NA	83.1666	3.0369	0.0002391	0.0064854	1.2487	8.3199	2.1699	no
ENSG00000114120	SLC25A36	protein_coding	solute carrier family 25 member 36	24865.2	3.0317	4.5343e-59	2.4512e-56	29.7362	208.965	2.76	no
ENSG00000163485	ADORA1	protein_coding	adenosine A1 receptor	529.773	3.0247	7.5994e-08	3.4938e-06	0.5987	5.6461	1.8074	yes
ENSG00000226604	PAPPA-AS2	antisense	NA	182.551	3.0247	1.5796e-07	6.927e-06	0.3809	2.2245	1.585	no
ENSG00000226334	RP11-217B7.2	antisense	NA	58.1957	3.0156	0.00099614	0.023171	0.4799	5.742	2.8074	no
ENSG00000154930	ACSS1	protein_coding	acyl-CoA synthetase short chain family member 1	1204.37	3.004	5.1281e-29	9.0333e-27	0.9555	7.137	2	yes
ENSG00000073849	ST6GAL1	protein_coding	ST6 beta-galactoside alpha-2,6-sialyltransferase 1	1401.75	2.9999	3.249e-25	4.673e-23	1.8267	11.655	2.1155	yes
ENSG00000274180	NATD1	protein_coding	N-acetyltransferase domain containing 1	4439.14	2.9909	5.3454e-28	8.9629e-26	2.3987	19.1366	2.737	yes
ENSG00000259416	RP11-158M2.5	antisense	NA	70.6362	2.9819	0.00074765	0.018075	0.4121	2.3674	1.585	no
ENSG00000136869	TLR4	protein_coding	toll like receptor 4	1145.01	2.9792	1.9287e-24	2.7118e-22	0.7112	5.6501	1.8074	yes
ENSG00000115594	IL1R1	protein_coding	interleukin 1 receptor type 1	52623	2.9741	7.6385e-41	2.1195e-38	33.3972	245.249	2.8551	no
ENSG00000283352	GUSBP1	lincRNA	LINC00680-GUSBP4 readthrough	77.9135	2.9728	0.0019712	0.042727	0.4667	3.8842	2.3219	no
ENSG00000130600	H19	processed_transcript	H19 imprinted maternally expressed transcript	2416.85	2.9487	2.9656e-15	2.3904e-13	3.9257	26.2307	2.433	yes
ENSG00000175426	PCSK1	protein_coding	proprotein convertase subtilisin/kexin type 1	543.559	2.9385	7.8057e-12	5.0989e-10	0.4048	2.9931	2	no
ENSG00000116194	ANGPTL1	protein_coding	angiopoietin like 1	543.735	2.9317	9.8867e-15	7.6732e-13	1.2052	8.87	2.3219	yes
ENSG00000065717	TLE2	protein_coding	TLE family member 2, transcriptional corepressor	2899.2	2.9253	4.7407e-36	1.1797e-33	4.5472	35.0906	2.585	yes
ENSG00000067113	PLPP1	protein_coding	phospholipid phosphatase 1	7983.96	2.9228	3.5482e-21	4.1358e-19	18.6138	125.531	2.6668	yes
ENSG00000228495	LINC01013	lincRNA	long intergenic non-protein coding RNA 1013	88.6762	2.8975	0.00011294	0.0032104	0.3984	2.6158	2	no
ENSG00000027697	IFNGR1	protein_coding	interferon gamma receptor 1	16890	2.8905	2.0701e-25	3.005e-23	26.0282	177.36	2.7208	yes
ENSG00000162645	GBP2	protein_coding	guanylate binding protein 2	2170	2.888	4.2895e-12	2.8677e-10	2.0102	17.2981	2.585	yes
ENSG00000241394	HLA-DMA	protein_coding	major histocompatibility complex, class II, DM alpha	235.275	2.8869	4.6909e-06	0.00016829	0.6825	5.5104	1.8074	no
ENSG00000186907	RTN4RL2	protein_coding	reticulon 4 receptor like 2	233.729	2.8842	0.0007635	0.018401	0.3443	3.1056	2	yes
ENSG00000257322	RP11-511B23.2	antisense	NA	48.4887	2.8659	0.00094208	0.022126	0.2894	2.3524	1.585	no
ENSG00000186205	MARC1	protein_coding	mitochondrial amidoxime reducing component 1	719.273	2.8492	5.4811e-16	4.6075e-14	1.3608	7.8914	2.1699	yes
ENSG00000241362	RPL36AP43	processed_pseudogene	NA	35.5938	2.8456	0.0026918	0.0559	1.1798	8.6509	2.3219	no
ENSG00000169891	REPS2	protein_coding	RALBP1 associated Eps domain containing 2	4317.72	2.8453	3.6924e-17	3.4978e-15	2.0936	14.3662	2.3219	yes
ENSG00000161835	GRASP	protein_coding	trafficking regulator and scaffold protein tamalin	249.419	2.8383	0.00012777	0.003613	0.6137	6.8128	2	yes
ENSG00000259065	RP5-1021I20.1	antisense	NA	177.357	2.837	3.8069e-07	1.5873e-05	1.3703	12.0164	2.7004	no
ENSG00000144152	FBLN7	protein_coding	fibulin 7	662.129	2.8285	9.559e-14	7.0856e-12	0.8604	5.9666	1.8074	yes
ENSG00000081041	CXCL2	protein_coding	C-X-C motif chemokine ligand 2	721.159	2.8268	9.095e-11	5.3705e-09	3.7478	23.9266	2.3219	yes
ENSG00000253768	CTB-33O18.1	lincRNA	NA	44.2493	2.8255	0.00075802	0.018297	0.7646	4.2758	1.3219	no
ENSG00000133639	BTG1	protein_coding	BTG anti-proliferation factor 1	11300	2.818	4.5268e-29	8.019e-27	8.7494	59.4565	2.585	yes
ENSG00000044524	EPHA3	protein_coding	EPH receptor A3	2225.42	2.8119	5.9974e-27	9.5457e-25	1.1593	7.6641	2.1699	no
ENSG00000244968	LIFR-AS1	antisense	LIFR antisense RNA 1	335.662	2.8052	2.1703e-11	1.3556e-09	0.475	3.3906	2	no
ENSG00000035664	DAPK2	protein_coding	death associated protein kinase 2	1004.67	2.8035	9.936e-19	1.049e-16	1.8812	11.4686	2	yes
ENSG00000189058	APOD	protein_coding	apolipoprotein D	6359.72	2.8034	1.5526e-27	2.5487e-25	29.8177	195.478	2.6605	yes
ENSG00000162692	VCAM1	protein_coding	vascular cell adhesion molecule 1	1688.1	2.7849	7.5595e-15	5.9406e-13	1.8503	11.2726	2	yes
ENSG00000226237	GAS1RR	lincRNA	GAS1 adjacent regulatory RNA	911.734	2.7783	2.0282e-18	2.1057e-16	0.6592	3.9916	1.3219	no
ENSG00000150540	HNMT	protein_coding	histamine N-methyltransferase	7013.6	2.7763	6.141e-36	1.5162e-33	23.2976	151.572	2.6724	yes
ENSG00000112769	LAMA4	protein_coding	laminin subunit alpha 4	20094.6	2.7664	9.9371e-32	2.0102e-29	13.1692	92.8563	2.7472	yes
ENSG00000125968	ID1	protein_coding	inhibitor of DNA binding 1, HLH protein	5709.32	2.7636	4.5432e-10	2.576e-08	26.9112	152.237	2.45	yes
ENSG00000126368	NR1D1	protein_coding	nuclear receptor subfamily 1 group D member 1	1336.34	2.7599	3.7283e-17	3.5211e-15	1.5975	10.4628	1.8745	yes
ENSG00000198520	C1orf228	protein_coding	armadillo like helical domain containing 1	228.268	2.7488	0.00025025	0.0067468	1.5115	7.1734	1.415	no
ENSG00000115738	ID2	protein_coding	inhibitor of DNA binding 2	2361.91	2.7473	2.826e-18	2.9244e-16	8.5639	53.4143	2.433	yes
ENSG00000254343	RP11-760H22.2	lincRNA	NA	111.874	2.7391	0.00032813	0.0086024	0.857	9.1761	2.3219	no
ENSG00000231212	RP11-111F5.3	lincRNA	NA	40.4389	2.7332	0.0048733	0.0933	0.5368	3.0272	1	no
ENSG00000237732	AC010980.2	transcribed_unprocessed_pseudogene	cancer/testis associated transcript 75	126.053	2.7317	0.0001112	0.0031667	1.159	6.4738	1.8074	no
ENSG00000107738	C10orf54	protein_coding	V-set immunoregulatory receptor	8513.69	2.7308	5.603e-14	4.1929e-12	14.5807	88.1193	2.4757	yes
ENSG00000238042	RP11-815M8.1	lincRNA	long intergenic non-protein coding RNA 2257	47.1387	2.7278	0.0017446	0.038469	0.4065	2.3258	1.585	no
ENSG00000259673	IQCH-AS1	lincRNA	IQCH antisense RNA 1	715.129	2.7254	9.1474e-08	4.1568e-06	0.6787	4.6342	1.585	no
ENSG00000142303	ADAMTS10	protein_coding	ADAM metallopeptidase with thrombospondin type 1 motif 10	3110.34	2.7212	1.4702e-23	1.9287e-21	7.7883	53.5835	2.6114	yes
ENSG00000213626	LBH	protein_coding	LBH regulator of WNT signaling pathway	3376.74	2.7207	5.4976e-12	3.629e-10	4.754	28.3976	2.273	no
ENSG00000140450	ARRDC4	protein_coding	arrestin domain containing 4	4207.19	2.7205	3.026e-31	5.9301e-29	3.3687	20.4658	2.3923	yes
ENSG00000128262	POM121L9P	transcribed_unprocessed_pseudogene	POM121 transmembrane nucleoporin like 9, pseudogene	20736.7	2.7118	1.1292e-24	1.5949e-22	14.2443	99.8075	2.7513	yes
ENSG00000249835	VCAN-AS1	antisense	VCAN antisense RNA 1	297.912	2.704	2.0214e-08	9.9343e-07	6.2465	33.4115	2.2801	no
ENSG00000183691	NOG	protein_coding	noggin	1867.39	2.7027	5.4213e-22	6.6141e-20	3.5848	22.1384	2.2016	yes
ENSG00000254743	OR10V3P	unprocessed_pseudogene	olfactory receptor family 10 subfamily V member 3 pseudogene	67.3435	2.6971	0.0025848	0.0542	0.6924	3.0237	1	no
ENSG00000257252	RP11-486A14.2	antisense	NA	76.1858	2.6883	0.00080562	0.019253	0.7005	5.6682	1.8074	no
ENSG00000105664	COMP	protein_coding	cartilage oligomeric matrix protein	14306	2.6809	2.7337e-14	2.0805e-12	22.8962	135.135	2.5025	yes
ENSG00000173559	NABP1	protein_coding	nucleic acid binding protein 1	65125.1	2.6671	6.8874e-35	1.5763e-32	86.681	486.82	2.4713	no
ENSG00000168955	TM4SF20	protein_coding	transmembrane 4 L six family member 20	950.591	2.6664	1.4512e-12	1.0045e-10	1.5182	9.0663	1.737	yes
ENSG00000180139	ACTA2-AS1	antisense	ACTA2 antisense RNA 1	620.091	2.6662	2.3195e-12	1.5742e-10	1.9276	11.5986	2.1155	no
ENSG00000245888	FLJ21408	antisense	NSMCE1 divergent transcript	205.731	2.6637	3.1416e-06	0.00011534	0.7222	4.0964	1.3219	no
ENSG00000215481	BCRP3	transcribed_unprocessed_pseudogene	NA	79.9788	2.6534	0.00041348	0.010627	0.69	5.1999	1.585	no
ENSG00000197927	C2orf27A	transcribed_unprocessed_pseudogene	neurobeachin pseudogene 2	379.072	2.6483	2.3819e-09	1.2615e-07	1.7	9.4189	1.737	no
ENSG00000011465	DCN	protein_coding	decorin	345182	2.6479	2.7369e-23	3.5461e-21	684.386	4010.6	2.5501	yes
ENSG00000147576	ADHFE1	protein_coding	alcohol dehydrogenase iron containing 1	715.316	2.6478	1.4683e-11	9.3574e-10	2.7237	13.3167	1.8074	no
ENSG00000085465	OVGP1	protein_coding	oviductal glycoprotein 1	221.231	2.6407	9.5243e-07	3.7569e-05	0.3327	2.317	1.585	yes
ENSG00000101605	MYOM1	protein_coding	myomesin 1	404.016	2.6393	4.0982e-12	2.7457e-10	0.4941	2.708	2	no
ENSG00000134242	PTPN22	protein_coding	protein tyrosine phosphatase non-receptor type 22	2528.48	2.6282	4.4553e-19	4.7842e-17	3.5175	21.8391	2.2016	no
ENSG00000223953	C1QTNF5	protein_coding	C1q and TNF related 5	2853.22	2.6163	1.5461e-11	9.8331e-10	10.3211	54.5407	2.3479	yes
ENSG00000007944	MYLIP	protein_coding	myosin regulatory light chain interacting protein	449.264	2.614	6.6713e-10	3.723e-08	0.5609	2.9288	1	yes
ENSG00000132386	SERPINF1	protein_coding	serpin family F member 1	52478.1	2.6111	1.0064e-15	8.4144e-14	178.9	924.57	2.363	yes
ENSG00000187288	CIDEC	protein_coding	cell death inducing DFFA like effector c	2085.89	2.6103	4.2115e-10	2.4053e-08	8.3234	44.0922	2.3219	yes
ENSG00000196839	ADA	protein_coding	adenosine deaminase	1375.53	2.6074	1.5935e-07	6.9686e-06	4.5684	22.7817	2	yes
ENSG00000281909	RP11-439M15.1	unprocessed_pseudogene	NA	57.5405	2.6017	0.0009592	0.022495	0.3343	2.3661	1.585	no
ENSG00000203808	BVES-AS1	antisense	BVES antisense RNA 1	110.202	2.5934	0.00063788	0.015675	0.6693	3.5131	1.3219	no
ENSG00000224389	C4B	protein_coding	complement C4B (Chido blood group)	354.952	2.5919	7.2802e-06	0.0002542	0.811	4.9363	1.585	no
ENSG00000116741	RGS2	protein_coding	regulator of G protein signaling 2	10052.8	2.5855	2.872e-16	2.4537e-14	33.9598	188.86	2.4406	no
ENSG00000233665	RP11-523O18.5	processed_transcript	NA	706.731	2.576	1.8093e-10	1.0501e-08	2.0782	9.7883	1.8745	yes
ENSG00000151136	BTBD11	protein_coding	BTB domain containing 11	3830.38	2.5747	1.7548e-27	2.8657e-25	3.2085	17.2131	2.1699	no
ENSG00000115380	EFEMP1	protein_coding	EGF containing fibulin extracellular matrix protein 1	90880.3	2.5715	9.5949e-24	1.2802e-21	144.173	805.651	2.4765	yes
ENSG00000137880	GCHFR	protein_coding	GTP cyclohydrolase I feedback regulator	279.358	2.5581	7.2427e-06	0.00025317	2.263	12.5023	2.2224	yes
ENSG00000216490	IFI30	protein_coding	IFI30 lysosomal thiol reductase	889.44	2.5552	3.6713e-08	1.7548e-06	4.847	27.825	2.273	yes
ENSG00000274104	CTD-2553L13.10	lincRNA	NA	62.3982	2.5469	0.0019507	0.042446	0.7893	4.2627	1.3219	no
ENSG00000116667	C1orf21	protein_coding	chromosome 1 open reading frame 21	2797.58	2.5381	7.3915e-13	5.2316e-11	4.8574	31.1631	2.415	no
ENSG00000174804	FZD4	protein_coding	frizzled class receptor 4	12486	2.5376	3.5598e-30	6.5274e-28	5.7971	32.6109	2.2801	yes
ENSG00000007255	TRAPPC6A	protein_coding	trafficking protein particle complex 6A	452.479	2.5364	7.4149e-06	0.00025862	4.3393	20.6136	2.1375	yes
ENSG00000232679	RP11-400N13.3	lincRNA	NA	71.8778	2.5356	0.00028191	0.0074974	0.829	4.3263	1.3219	no
ENSG00000126353	CCR7	protein_coding	C-C motif chemokine receptor 7	600.883	2.5346	2.5093e-12	1.6993e-10	1.0567	6.1995	1.8074	no
ENSG00000107551	RASSF4	protein_coding	Ras association domain family member 4	1801.82	2.533	1.2894e-19	1.4286e-17	2.5909	14.5621	2	no
ENSG00000197210	KB-1592A4.15	lincRNA	NA	695.152	2.5272	4.7615e-10	2.6901e-08	0.5365	2.7939	1	no
ENSG00000103888	CEMIP	protein_coding	cell migration inducing hyaluronidase 1	130721	2.5124	2.5939e-23	3.3748e-21	62.8423	368.339	2.5275	yes
ENSG00000184500	PROS1	protein_coding	protein S	4358.71	2.5123	1.5023e-05	0.00049688	5.3345	26.7342	2.2224	yes
ENSG00000161103	AC008132.13	transcribed_processed_pseudogene	Putative uncharacterized protein DKFZp434K191	2121.17	2.5052	2.459e-24	3.4117e-22	1.3965	7.1269	2	yes
ENSG00000235848	RMDN2-AS1	antisense	NA	194.659	2.5043	1.3854e-06	5.3426e-05	2.1329	9.6362	1.8745	no
ENSG00000100336	APOL4	protein_coding	apolipoprotein L4	552.59	2.503	2.6106e-05	0.00084215	1.7635	7.9418	1.585	yes
ENSG00000259649	RP11-351M8.1	antisense	NA	480.913	2.5003	1.59e-11	1.0092e-09	8.4284	41.471	2.2224	yes
ENSG00000263326	RP11-266L9.6	unprocessed_pseudogene	NA	88.2083	2.4969	0.00022877	0.0062321	0.8955	4.0696	1.3219	no
ENSG00000261487	AC135048.13	processed_transcript	NA	93.0983	2.4876	0.00084311	0.020073	0.7662	4.6754	1.585	no
ENSG00000205309	NT5M	protein_coding	5',3'-nucleotidase, mitochondrial	178.136	2.4853	0.001495	0.033578	0.9036	3.692	1.3219	no
ENSG00000076258	FMO4	protein_coding	flavin containing dimethylaniline monoxygenase 4	589.114	2.4629	3.7947e-13	2.7353e-11	1.6312	8.8945	1.737	yes
ENSG00000205464	ATP6AP1L	protein_coding	ATPase H+ transporting accessory protein 1 like	1197.27	2.4628	1.6938e-11	1.0686e-09	2.2622	10.1644	1.8745	no
ENSG00000105792	CFAP69	protein_coding	cilia and flagella associated protein 69	2401.26	2.4614	3.7586e-13	2.7154e-11	3.6716	19.983	2.0704	yes
ENSG00000132000	PODNL1	protein_coding	podocan like 1	3871.27	2.4576	8.1083e-15	6.34e-13	11.1842	60.264	2.3458	yes
ENSG00000109272	PF4V1	protein_coding	platelet factor 4 variant 1	184.96	2.4576	3.6639e-05	0.0011465	1.2274	7.8673	2.1699	no
ENSG00000104432	IL7	protein_coding	interleukin 7	363.574	2.4544	1.0966e-08	5.5191e-07	1.1984	6.0799	1.8074	yes
ENSG00000163794	UCN	protein_coding	urocortin	216.767	2.4509	0.00077258	0.018534	0.9209	8.5692	2.3219	no
ENSG00000138821	SLC39A8	protein_coding	solute carrier family 39 member 8	2550.41	2.4502	4.9612e-13	3.5435e-11	3.4994	15.914	2.0875	no
ENSG00000047648	ARHGAP6	protein_coding	Rho GTPase activating protein 6	1747.59	2.4501	7.1696e-11	4.2576e-09	2.0208	9.7945	1.8745	yes
ENSG00000174080	CTSF	protein_coding	cathepsin F	1474.66	2.4368	3.1559e-12	2.1235e-10	3.2002	18.2426	2.2479	yes
ENSG00000221869	CEBPD	protein_coding	CCAAT enhancer binding protein delta	19389.5	2.4333	2.5585e-09	1.3483e-07	41.4319	184.396	2.1391	yes
ENSG00000104883	PEX11G	protein_coding	peroxisomal biogenesis factor 11 gamma	147.132	2.4294	0.00010206	0.0029279	0.762	3.8	1.3219	no
ENSG00000264672	SEPT4-AS1	antisense	SEPTIN4 antisense RNA 1	86.5483	2.4157	0.00064194	0.015762	0.6164	3.2952	1	yes
ENSG00000234604	RP1-206D15.5	processed_pseudogene	NA	60.9857	2.4132	0.0020901	0.044794	4.7926	22.6756	2	no
ENSG00000228109	MFI2-AS1	antisense	MELTF antisense RNA 1	269.634	2.4069	0.00022967	0.0062513	2.9344	19.2391	2.3219	no
ENSG00000117525	F3	protein_coding	coagulation factor III, tissue factor	1909.6	2.404	1.6197e-09	8.6962e-08	4.7829	22.2703	1.9386	no
ENSG00000180875	GREM2	protein_coding	gremlin 2, DAN family BMP antagonist	1116.87	2.4034	4.5395e-14	3.4052e-12	0.9323	5.2027	1.585	no
ENSG00000168461	RAB31	protein_coding	RAB31, member RAS oncogene family	14012.4	2.4	5.8562e-15	4.6369e-13	17.1022	86.5877	2.2895	yes
ENSG00000260552	RP11-49I11.1	antisense	cell fate and sterol metabolism associated divergent transcript of MOCOS	152.853	2.3993	0.00059981	0.014855	1.5778	7.7322	1.585	no
ENSG00000137959	IFI44L	protein_coding	interferon induced protein 44 like	8779.97	2.3926	1.8695e-15	1.5426e-13	12.4227	58.6723	2.2065	no
ENSG00000116016	EPAS1	protein_coding	endothelial PAS domain protein 1	20075.9	2.3925	3.593e-25	5.1443e-23	16.3348	79.4943	2.2345	yes
ENSG00000227746	C4A	protein_coding	complement C4A (Rodgers blood group)	978.031	2.3876	6.7687e-07	2.7469e-05	1.0811	4.4572	1.3219	yes
ENSG00000167157	PRRX2	protein_coding	paired related homeobox 2	544.76	2.382	4.0055e-06	0.00014547	1.9574	9.5721	1.8745	yes
ENSG00000177025	C19orf18	protein_coding	chromosome 19 open reading frame 18	122.723	2.3797	6.6378e-05	0.0019728	0.7114	3.7586	1.3219	no
ENSG00000088280	ASAP3	protein_coding	ArfGAP with SH3 domain, ankyrin repeat and PH domain 3	4322.7	2.3755	1.8054e-16	1.5724e-14	8.2579	37.904	2.1155	yes
ENSG00000282854	ASAP3	protein_coding	ArfGAP with SH3 domain, ankyrin repeat and PH domain 3	4322.7	2.3755	1.8054e-16	1.5724e-14	8.2579	37.904	2.1155	yes
ENSG00000177757	FAM87B	lincRNA	family with sequence similarity 87 member B	265.043	2.3751	4.2283e-07	1.7491e-05	0.5668	3.0902	1	no
ENSG00000157514	TSC22D3	protein_coding	TSC22 domain family member 3	27828.8	2.371	1.9255e-12	1.3211e-10	74.5378	333.216	2.1358	yes
ENSG00000189184	PCDH18	protein_coding	protocadherin 18	19843.7	2.3691	5.8512e-18	5.9183e-16	16.3308	77.4142	2.1979	yes
ENSG00000204381	LAYN	protein_coding	layilin	7783.93	2.3654	1.3723e-15	1.1444e-13	19.7941	90.4453	2.1155	yes
ENSG00000182118	FAM89A	protein_coding	family with sequence similarity 89 member A	797.486	2.3608	1.0965e-07	4.8977e-06	2.4954	11.6318	2.1155	no
ENSG00000060718	COL11A1	protein_coding	collagen type XI alpha 1 chain	132952	2.3565	6.2487e-27	9.8456e-25	96.6197	439.611	2.1699	yes
ENSG00000099864	PALM	protein_coding	paralemmin	245.026	2.3553	0.00012428	0.0035202	0.5537	3.0123	1	yes
ENSG00000275367	RP11-266K4.14	lincRNA	NA	347.416	2.3549	5.9963e-08	2.7937e-06	0.3846	2.0405	1.585	no
ENSG00000167549	CORO6	protein_coding	coronin 6	2335.01	2.3501	5.9954e-12	3.9493e-10	5.1783	23.743	2.0589	yes
ENSG00000177989	ODF3B	protein_coding	outer dense fiber of sperm tails 3B	386.053	2.3477	0.00027983	0.0074672	2.9409	11.3844	1.585	no
ENSG00000225511	LINC00475	lincRNA	NA	480.383	2.3428	7.1992e-06	0.00025193	6.9814	34.4256	2.1293	yes
ENSG00000224505	AC002117.1	antisense	NA	97.6711	2.3369	0.00074748	0.018075	2.5679	10.8512	1.585	no
ENSG00000239511	POM121L7	processed_pseudogene	NA	777.475	2.3334	3.5014e-07	1.4677e-05	1.1816	6.8802	2	no
ENSG00000104047	DTWD1	protein_coding	DTW domain containing 1	8123.02	2.3329	1.2744e-16	1.1384e-14	29.9065	143.528	2.2257	no
ENSG00000244270	RPL32P29	processed_pseudogene	ribosomal protein L32 pseudogene 29	226.567	2.3326	5.6375e-05	0.0017046	5.973	27.0091	2	no
ENSG00000162407	PLPP3	protein_coding	phospholipid phosphatase 3	70446.6	2.3231	2.403e-17	2.3112e-15	93.1535	445.854	2.2495	no
ENSG00000171840	NINJ2	protein_coding	ninjurin 2	340.313	2.3185	0.00048844	0.012371	2.5142	11.5436	1.7004	no
ENSG00000173838	2021-03-10	protein_coding	membrane associated ring-CH-type finger 10	873.859	2.3183	2.3541e-05	0.00076331	2.8428	12.1456	1.7004	no
ENSG00000163735	CXCL5	protein_coding	C-X-C motif chemokine ligand 5	681.794	2.3173	2.6464e-06	9.7995e-05	1.3493	5.9095	1.8074	no
ENSG00000166821	PEX11A	protein_coding	peroxisomal biogenesis factor 11 alpha	1372.63	2.2917	8.4884e-11	5.0313e-09	3.3442	14.7442	2	no
ENSG00000101347	SAMHD1	protein_coding	SAM and HD domain containing deoxynucleoside triphosphate triphosphohydrolase 1	4071.15	2.2886	1.5049e-08	7.4901e-07	5.0614	24.4934	2.0589	yes
ENSG00000230712	GGTLC4P	unprocessed_pseudogene	NA	637.044	2.287	2.644e-07	1.1264e-05	5.9644	31.6	2.237	yes
ENSG00000172059	KLF11	protein_coding	Kruppel like factor 11	742.335	2.278	6.4624e-09	3.3272e-07	0.8355	3.5754	1.3219	yes
ENSG00000196569	LAMA2	protein_coding	laminin subunit alpha 2	20948.1	2.277	1.5291e-14	1.1751e-12	10.3429	46.3708	2.0952	no
ENSG00000164949	GEM	protein_coding	GTP binding protein overexpressed in skeletal muscle	1142.61	2.2697	1.2332e-12	8.5738e-11	2.7638	13.4665	1.8074	yes
ENSG00000157152	SYN2	protein_coding	synapsin II	301.284	2.2528	0.0003558	0.0092657	1.1124	4.0999	1.3219	no
ENSG00000133401	PDZD2	protein_coding	PDZ domain containing 2	712.534	2.2463	1.9959e-06	7.5582e-05	1.0203	4.4632	1.3219	no
ENSG00000165124	SVEP1	protein_coding	sushi, von Willebrand factor type A, EGF and pentraxin domain containing 1	18632.1	2.2445	2.5904e-20	2.9428e-18	7.5417	30.5719	1.8301	yes
ENSG00000049246	PER3	protein_coding	period circadian regulator 3	743.366	2.2388	3.5332e-10	2.0253e-08	0.966	4.2744	1.3219	no
ENSG00000164188	RANBP3L	protein_coding	RAN binding protein 3 like	1770.39	2.2351	3.6943e-10	2.1138e-08	2.9091	12.7371	1.8074	yes
ENSG00000139112	GABARAPL1	protein_coding	GABA type A receptor associated protein like 1	4127.48	2.2323	7.2365e-13	5.1335e-11	11.1665	48.816	2.0589	yes
ENSG00000104419	NDRG1	protein_coding	N-myc downstream regulated 1	13217.6	2.2269	2.781e-17	2.6666e-15	29.3753	134.268	2.1699	yes
ENSG00000240038	AMY2B	protein_coding	amylase alpha 2B	673.475	2.2266	3.3185e-11	2.0444e-09	1.5439	6.7466	1.415	no
ENSG00000105509	HAS1	protein_coding	hyaluronan synthase 1	9500.97	2.2253	3.1622e-08	1.5184e-06	25.9468	110.264	2.0395	no
ENSG00000117318	ID3	protein_coding	inhibitor of DNA binding 3, HLH protein	8333.59	2.2246	3.5916e-07	1.4995e-05	53.0997	223.249	2.0525	no
ENSG00000283060	ID3	protein_coding	inhibitor of DNA binding 3, HLH protein	8333.59	2.2246	3.5916e-07	1.4995e-05	53.0997	223.249	2.0525	no
ENSG00000114107	CEP70	protein_coding	centrosomal protein 70	4406.67	2.2227	6.4294e-11	3.8326e-09	13.2126	57.1731	2.0506	no
ENSG00000125945	ZNF436	protein_coding	zinc finger protein 436	1486.21	2.2194	1.2798e-11	8.2062e-10	1.5499	6.6922	1.415	yes
ENSG00000283009	ZNF436	protein_coding	zinc finger protein 436	1486.21	2.2194	1.2798e-11	8.2062e-10	1.5499	6.6922	1.415	yes
ENSG00000144857	BOC	protein_coding	BOC cell adhesion associated, oncogene regulated	4770.85	2.219	6.9149e-10	3.8511e-08	8.1562	37.6081	2.1155	yes
ENSG00000162777	DENND2D	protein_coding	DENN domain containing 2D	216.731	2.2186	1.266e-05	0.00042364	0.6825	2.7431	1	no
ENSG00000126803	HSPA2	protein_coding	heat shock protein family A (Hsp70) member 2	2205.22	2.2152	1.8856e-13	1.3879e-11	3.5054	15.4673	1.6781	no
ENSG00000120549	KIAA1217	protein_coding	KIAA1217	12920.9	2.2137	5.0109e-13	3.5708e-11	14.5262	54.7813	1.8074	yes
ENSG00000116774	OLFML3	protein_coding	olfactomedin like 3	87458	2.2054	4.8217e-12	3.203e-10	254.99	1053.88	2.043	yes
ENSG00000054654	SYNE2	protein_coding	spectrin repeat containing nuclear envelope protein 2	7800.3	2.2043	3.838e-17	3.6138e-15	5.7167	23.5852	1.8365	no
ENSG00000072952	MRVI1	protein_coding	inositol 1,4,5-triphosphate receptor associated 1	2599.29	2.2029	1.6351e-11	1.0336e-09	2.5625	10.9207	1.585	no
ENSG00000149212	SESN3	protein_coding	sestrin 3	11713.9	2.2023	1.7998e-16	1.5724e-14	5.0919	23.1233	2	yes
ENSG00000243056	EIF4EBP3	protein_coding	eukaryotic translation initiation factor 4E binding protein 3	360.789	2.2009	5.4941e-08	2.5673e-06	3.5874	15.7131	1.7655	yes
ENSG00000172594	SMPDL3A	protein_coding	sphingomyelin phosphodiesterase acid like 3A	2216.17	2.1963	6.8454e-14	5.1104e-12	6.0358	27.9283	2.0506	yes
ENSG00000223891	OSER1-AS1	lincRNA	OSER1 divergent transcript	728.819	2.1924	3.8201e-08	1.8176e-06	2.8041	12.3943	1.7004	no
ENSG00000143162	CREG1	protein_coding	cellular repressor of E1A stimulated genes 1	3121.03	2.1904	3.182e-11	1.9679e-09	7.6938	32.5549	1.9175	no
ENSG00000276017	AC007325.1	protein_coding	NA	417.023	2.1877	1.9688e-08	9.7062e-07	0.8482	3.6206	1.3219	yes
ENSG00000162148	PPP1R32	protein_coding	protein phosphatase 1 regulatory subunit 32	349.731	2.1774	6.18e-07	2.5133e-05	2.4013	10.0736	1.8745	no
ENSG00000102287	GABRE	protein_coding	gamma-aminobutyric acid type A receptor subunit epsilon	1263.38	2.175	3.0082e-07	1.2712e-05	1.8789	8.7478	1.737	no
ENSG00000250305	KIAA1456	protein_coding	tRNA methyltransferase 9B (putative)	1406.43	2.1729	5.4348e-07	2.2205e-05	1.4632	5.7582	1.8074	no
ENSG00000170801	HTRA3	protein_coding	HtrA serine peptidase 3	2468.99	2.1714	6.8824e-07	2.7881e-05	4.9276	20.371	1.8074	no
ENSG00000122971	ACADS	protein_coding	acyl-CoA dehydrogenase short chain	2366.33	2.1709	1.0593e-05	0.00035908	7.7431	28.9456	1.737	no
ENSG00000071282	LMCD1	protein_coding	LIM and cysteine rich domains 1	23527.1	2.1696	2.3867e-09	1.262e-07	110.881	438.68	1.974	yes
ENSG00000157150	TIMP4	protein_coding	TIMP metallopeptidase inhibitor 4	3009.53	2.1685	1.3833e-07	6.1351e-06	15.477	58.1659	1.8826	yes
ENSG00000148655	C10orf11	protein_coding	leucine rich melanocyte differentiation associated	216.013	2.1681	0.00039026	0.010063	4.2081	18.0699	1.926	no
ENSG00000245812	RP11-175K6.1	lincRNA	long intergenic non-protein coding RNA 2202	938.415	2.1647	2.4709e-06	9.2012e-05	9.9364	39.5029	1.8981	yes
ENSG00000197497	ZNF665	protein_coding	zinc finger protein 665	296.528	2.1573	0.0024803	0.0522	1.0541	5.5531	1.8074	no
ENSG00000113389	NPR3	protein_coding	natriuretic peptide receptor 3	103631	2.1572	4.2469e-16	3.5796e-14	74.876	325.38	2.1008	no
ENSG00000064655	EYA2	protein_coding	EYA transcriptional coactivator and phosphatase 2	3738.38	2.153	6.1499e-11	3.673e-09	7.9095	33.6485	1.9594	yes
ENSG00000166900	STX3	protein_coding	syntaxin 3	1269.26	2.1508	1.8825e-07	8.1755e-06	4.9741	20.7317	1.8745	yes
ENSG00000259615	RP11-429B14.3	antisense	NA	204.159	2.1481	0.00051249	0.012917	3.7972	19.213	2	no
ENSG00000134853	PDGFRA	protein_coding	platelet derived growth factor receptor alpha	80422.9	2.1461	1.1864e-18	1.24e-16	66.8693	273.862	2.0158	yes
ENSG00000117479	SLC19A2	protein_coding	solute carrier family 19 member 2	1945.56	2.1405	2.3556e-06	8.8107e-05	2.6262	10.8138	1.585	no
ENSG00000172803	SNX32	protein_coding	sorting nexin 32	430.596	2.1373	0.0020579	0.044225	1.4668	7.9126	2.1699	no
ENSG00000224594	RPL29P19	processed_pseudogene	NA	368.242	2.1349	3.8387e-05	0.0011941	8.9239	36.0851	1.8875	yes
ENSG00000244731	C4A	protein_coding	complement C4A (Rodgers blood group)	103.08	2.1285	0.0018246	0.040055	1.2138	4.9889	1.585	no
ENSG00000111859	NEDD9	protein_coding	neural precursor cell expressed, developmentally down-regulated 9	18739.9	2.1266	2.9166e-15	2.3569e-13	18.847	83.7177	2.0875	no
ENSG00000244879	GABPB1-AS1	antisense	NA	16016.4	2.1256	1.2485e-14	9.6662e-13	8.7958	34.4047	1.8074	no
ENSG00000163050	COQ8A	protein_coding	coenzyme Q8A	1702.66	2.1152	2.4845e-05	0.00080394	3.1003	10.7282	1.585	yes
ENSG00000272841	RP3-428L16.2	antisense	NA	508.682	2.1117	2.3395e-06	8.7849e-05	1.3447	5.1468	1.585	yes
ENSG00000112096	SOD2	protein_coding	superoxide dismutase 2	26444.3	2.1114	4.8679e-10	2.7452e-08	48.718	193.062	1.9561	yes
ENSG00000266086	RP11-159D12.5	protein_coding	NA	1956.63	2.1101	8.5854e-10	4.731e-08	4.6047	16.9809	1.585	no
ENSG00000244607	CCDC13	protein_coding	coiled-coil domain containing 13	149.193	2.109	0.00058689	0.014605	1.0309	4.358	1.3219	no
ENSG00000163884	KLF15	protein_coding	Kruppel like factor 15	1401.18	2.0993	1.7317e-10	1.0092e-08	2.9313	12.1243	1.7004	yes
ENSG00000266904	CTC-559E9.1	lincRNA	NA	421.467	2.097	5.739e-05	0.0017319	2.8847	11.3642	1.585	no
ENSG00000249087	ZNF436-AS1	antisense	ZNF436 antisense RNA 1	327.442	2.0881	4.5677e-06	0.00016406	1.3458	5.9322	1.8074	yes
ENSG00000283106	ZNF436-AS1	antisense	NA	327.442	2.0881	4.5677e-06	0.00016406	1.3458	5.9322	1.8074	yes
ENSG00000171631	P2RY6	protein_coding	pyrimidinergic receptor P2Y6	608.409	2.083	5.9036e-05	0.0017765	1.8548	6.931	1.415	no
ENSG00000124766	SOX4	protein_coding	SRY-box transcription factor 4	7359.06	2.0818	9.1167e-12	5.9061e-10	5.8988	23.0439	1.7776	no
ENSG00000056558	TRAF1	protein_coding	TNF receptor associated factor 1	1891.91	2.0811	7.0263e-13	4.9957e-11	2.0806	8.3385	1.585	no
ENSG00000131459	GFPT2	protein_coding	glutamine-fructose-6-phosphate transaminase 2	5624.85	2.0797	6.6503e-09	3.4128e-07	12.2983	48.213	1.9143	no
ENSG00000087086	FTL	protein_coding	ferritin light chain	185413	2.079	1.2112e-06	4.7296e-05	1371.06	5598.08	2.0289	yes
ENSG00000273243	CTA-217C2.2	lincRNA	NA	183.149	2.0752	0.00062529	0.015401	3.3975	16.0419	2.0875	no
ENSG00000149435	GGTLC1	protein_coding	gamma-glutamyltransferase light chain 1	211.71	2.0725	0.00088842	0.021024	1.3331	5.0451	1.585	no
ENSG00000162687	KCNT2	protein_coding	potassium sodium-activated channel subfamily T member 2	773.964	2.0717	3.9514e-06	0.00014373	0.7892	3.1904	1	yes
ENSG00000138606	SHF	protein_coding	Src homology 2 domain containing F	293.565	2.0705	0.00086402	0.020477	1.1689	4.448	1.3219	no
ENSG00000213949	ITGA1	protein_coding	integrin subunit alpha 1	1468.11	2.0661	9.3776e-08	4.2429e-06	2.5668	9.3655	1.3219	no
ENSG00000183098	GPC6	protein_coding	glypican 6	11195.2	2.0527	9.4067e-17	8.5492e-15	7.5572	29.1349	1.737	yes
ENSG00000181804	SLC9A9	protein_coding	solute carrier family 9 member A9	612.812	2.0509	0.00037418	0.0096801	1.1641	5.0791	1.585	no
ENSG00000224032	EPB41L4A-AS1	lincRNA	NA	2241.81	2.0489	0.00019469	0.0053735	8.0959	35.6011	2.0395	no
ENSG00000123096	SSPN	protein_coding	sarcospan	1995.51	2.0473	8.7581e-07	3.5027e-05	2.5053	10.1822	1.4594	no
ENSG00000163083	INHBB	protein_coding	inhibin subunit beta B	868.198	2.0425	2.5886e-09	1.3595e-07	1.2894	5.3064	1.585	yes
ENSG00000110013	SIAE	protein_coding	sialic acid acetylesterase	8727.98	2.0387	1.2295e-11	7.9157e-10	13.0211	50.9048	1.8931	yes
ENSG00000197329	PELI1	protein_coding	pellino E3 ubiquitin protein ligase 1	1913.79	2.0361	1.2317e-06	4.7975e-05	2.7295	11.3079	1.585	yes
ENSG00000169122	FAM110B	protein_coding	family with sequence similarity 110 member B	927.412	2.0343	0.00022373	0.0061159	2.8191	11.9053	1.7004	yes
ENSG00000196549	MME	protein_coding	membrane metalloendopeptidase	166411	2.0325	3.1868e-14	2.4135e-12	282.789	1079.68	1.9284	yes
ENSG00000259605	AC074212.5	processed_transcript	NA	576.998	2.0266	4.8422e-05	0.0014769	1.8055	8.6844	1.737	no
ENSG00000174325	DIRC1	protein_coding	NA	170.694	2.0261	0.0029364	0.0605	0.6562	2.8143	1	no
ENSG00000106123	EPHB6	protein_coding	EPH receptor B6	456.172	2.0247	0.00093731	0.022047	0.7201	3.086	1	yes
ENSG00000224945	RP11-82L18.2	sense_intronic	NA	138.526	2.0223	0.0012885	0.029254	2.4674	8.0816	1.585	no
ENSG00000073331	ALPK1	protein_coding	alpha kinase 1	2047.03	2.0196	1.2054e-06	4.7126e-05	6.0719	18.6667	1.5146	no
ENSG00000236039	AC017060.1	lincRNA	long intergenic non-protein coding RNA 2889	211.478	2.0181	0.0032428	0.0662	1.9104	7.5749	1.585	no
ENSG00000151117	TMEM86A	protein_coding	transmembrane protein 86A	308.593	2.0129	0.0035657	0.0717	0.3764	2.0337	1.585	yes
ENSG00000141753	IGFBP4	protein_coding	insulin like growth factor binding protein 4	442412	2.0129	9.943e-08	4.4601e-06	1127.92	4047.56	1.8425	no
ENSG00000118985	ELL2	protein_coding	elongation factor for RNA polymerase II 2	47743.9	2.0077	2.0355e-15	1.6751e-13	70.2317	262.794	1.8946	no
ENSG00000241399	CD302	protein_coding	CD302 molecule	4389.91	2.0038	2.6812e-08	1.2953e-06	5.0714	21.2092	1.8745	yes
ENSG00000133466	C1QTNF6	protein_coding	C1q and TNF related 6	4442.08	2.0017	2.0342e-09	1.0792e-07	9.9874	37.8763	1.826	yes
ENSG00000271576	RP11-486G15.2	lincRNA	NA	426.282	2.0005	8.7965e-07	3.5108e-05	1.6325	5.6845	1.2224	no
ENSG00000143382	ADAMTSL4	protein_coding	ADAMTS like 4	18476.7	1.9988	7.9646e-10	4.4044e-08	27.9731	123.664	2.1078	yes
ENSG00000172216	CEBPB	protein_coding	CCAAT enhancer binding protein beta	7236.08	1.9978	6.9497e-07	2.8081e-05	20.4388	72.8911	1.8171	yes
ENSG00000100031	GGT1	protein_coding	gamma-glutamyltransferase 1	1045.35	1.9933	3.2437e-06	0.00011895	6.3953	28.128	2.0506	yes
ENSG00000160781	PAQR6	protein_coding	progestin and adipoQ receptor family member 6	789.691	1.9931	4.0914e-07	1.7014e-05	2.1465	9.0237	1.737	no
ENSG00000172572	PDE3A	protein_coding	phosphodiesterase 3A	1049.72	1.9925	1.2411e-09	6.7679e-08	0.7074	2.5031	1	no
ENSG00000164920	OSR2	protein_coding	odd-skipped related transciption factor 2	266.771	1.9904	0.00047556	0.012064	1.4146	5.0703	1.585	yes
ENSG00000250337	LINC01021	lincRNA	p53 upregulated regulator of p53 levels	378.045	1.9846	0.00028415	0.0075505	2.6215	8.6028	1.3219	yes
ENSG00000151726	ACSL1	protein_coding	acyl-CoA synthetase long chain family member 1	31738.7	1.9832	7.8708e-10	4.3602e-08	51.8801	188.129	1.8343	yes
ENSG00000255471	RP11-736K20.5	antisense	NA	404.782	1.9818	0.00047648	0.012078	4.2632	12.6732	1.4854	yes
ENSG00000206340	C4A	protein_coding	complement C4A (Rodgers blood group)	496.98	1.9797	5.8177e-06	0.00020541	1.059	3.8872	1.3219	no
ENSG00000153291	SLC25A27	protein_coding	solute carrier family 25 member 27	417.152	1.9795	2.7178e-05	0.00087134	2.5376	9.4956	1.3219	no
ENSG00000232774	FLJ22447	lincRNA	uncharacterized LOC400221	1527.2	1.9785	9.6021e-09	4.8482e-07	6.4809	21.9901	1.7162	no
ENSG00000240666	MME-AS1	antisense	NA	340.572	1.9778	0.001064	0.024602	3.1113	10.4599	1.4594	no
ENSG00000251364	CTD-2516F10.2	antisense	uncharacterized LOC100506258	160.459	1.9778	0.0012126	0.027691	1.7067	6.6184	1.415	no
ENSG00000154188	ANGPT1	protein_coding	angiopoietin 1	36075.9	1.9776	2.1996e-12	1.4993e-10	48.0913	174.17	1.8365	yes
ENSG00000108771	DHX58	protein_coding	DExH-box helicase 58	767.109	1.9776	3.3531e-07	1.4074e-05	2.6281	10.379	1.4594	no
ENSG00000136449	MYCBPAP	protein_coding	MYCBP associated protein	576.173	1.9711	0.00015703	0.0043916	5.5223	17.0544	1.3626	no
ENSG00000249740	OSMR-AS1	lincRNA	long intergenic non-protein coding RNA 1265	399.872	1.9708	1.092e-05	0.00036976	3.8293	14.3915	1.585	no
ENSG00000139597	N4BP2L1	protein_coding	NEDD4 binding protein 2 like 1	470.961	1.9657	5.7249e-06	0.00020306	1.8372	5.8213	1.2224	no
ENSG00000138031	ADCY3	protein_coding	adenylate cyclase 3	9963.16	1.9624	3.8923e-13	2.7992e-11	20.4745	71.9325	1.7975	no
ENSG00000063127	SLC6A16	protein_coding	solute carrier family 6 member 16	347.749	1.9618	9.6918e-05	0.0027957	2.5638	9.6984	1.4594	no
ENSG00000267280	TBX2-AS1	antisense	TBX2 antisense RNA 1	456.178	1.96	0.00067055	0.016387	9.0334	30.5332	1.6781	no
ENSG00000102878	HSF4	protein_coding	heat shock transcription factor 4	1070.97	1.9586	1.2938e-06	5.0145e-05	6.3322	24.2595	1.8365	no
ENSG00000272316	XXbac-BPGBPG55C20.2	lincRNA	NA	918.148	1.9559	4.4918e-06	0.00016188	0.8187	3.1669	1	no
ENSG00000146278	PNRC1	protein_coding	proline rich nuclear receptor coactivator 1	6676.78	1.9522	7.241e-08	3.3389e-06	20.5443	80.881	1.8981	no
ENSG00000142632	ARHGEF19	protein_coding	Rho guanine nucleotide exchange factor 19	3041.76	1.9517	7.9837e-07	3.2176e-05	9.7477	34.7783	1.7105	no
ENSG00000005379	TSPOAP1	protein_coding	TSPO associated protein 1	1792.66	1.9504	2.129e-06	8.033e-05	4.449	17.4618	1.848	no
ENSG00000166002	SMCO4	protein_coding	single-pass membrane protein with coiled-coil domains 4	1217.15	1.9489	1.9116e-06	7.2742e-05	12.7954	43.6929	1.6845	no
ENSG00000215861	WI2-1896O14.1	unprocessed_pseudogene	NA	1441.53	1.9476	9.6855e-08	4.3696e-06	10.2192	38.2411	1.826	yes
ENSG00000106799	TGFBR1	protein_coding	transforming growth factor beta receptor 1	12023.6	1.9381	4.1059e-14	3.0873e-12	11.9646	40.2104	1.6571	no
ENSG00000100342	APOL1	protein_coding	apolipoprotein L1	1851.66	1.9354	5.039e-08	2.3617e-06	6.0875	23.3858	1.7776	yes
ENSG00000228794	LINC01128	processed_transcript	long intergenic non-protein coding RNA 1128	2772.73	1.9306	5.029e-08	2.3605e-06	9.4229	37.9902	1.9635	no
ENSG00000095303	PTGS1	protein_coding	prostaglandin-endoperoxide synthase 1	8763.99	1.9299	1.8838e-06	7.1987e-05	12.2987	41.29	1.6919	no
ENSG00000272734	ADIRF-AS1	processed_transcript	ADIRF antisense RNA 1	1881.31	1.9202	1.3299e-08	6.6504e-07	3.4587	13.1444	1.8074	no
ENSG00000204219	TCEA3	protein_coding	transcription elongation factor A3	797.164	1.9189	2.6438e-07	1.1264e-05	3.4328	12.5683	1.8074	no
ENSG00000282941	TCEA3	protein_coding	transcription elongation factor A3	797.164	1.9189	2.6438e-07	1.1264e-05	3.4328	12.5683	1.8074	no
ENSG00000259450	RP11-265N7.1	lincRNA	NA	399.645	1.9125	0.00020804	0.005712	1.1041	4.0971	1.3219	yes
ENSG00000111058	ACSS3	protein_coding	acyl-CoA synthetase short chain family member 3	1815.07	1.912	2.565e-06	9.5402e-05	2.596	9.2318	1.3219	no
ENSG00000263238	CTSO	protein_coding	cathepsin O	3765.48	1.9093	6.0708e-05	0.0018181	7.6759	24.1306	1.4739	yes
ENSG00000181826	RELL1	protein_coding	RELT like 1	2982.78	1.9079	9.378e-09	4.7427e-07	4.3356	15.9576	1.7655	no
ENSG00000137507	LRRC32	protein_coding	leucine rich repeat containing 32	2280.98	1.9049	0.00010183	0.0029239	3.4927	10.1585	1.4594	yes
ENSG00000139329	LUM	protein_coding	lumican	25049.2	1.9032	2.2601e-07	9.7076e-06	94.0492	325.106	1.7789	yes
ENSG00000026652	AGPAT4	protein_coding	1-acylglycerol-3-phosphate O-acyltransferase 4	3310.47	1.9007	4.2991e-07	1.7737e-05	4.158	15.3002	1.6781	no
ENSG00000153094	BCL2L11	protein_coding	BCL2 like 11	454.31	1.9002	5.9133e-05	0.0017777	1.8492	5.8186	1.2224	yes
ENSG00000139178	C1RL	protein_coding	complement C1r subcomponent like	7356.18	1.8999	6.502e-09	3.3421e-07	31.1762	117.76	1.8948	no
ENSG00000169668	BCRP2	transcribed_unprocessed_pseudogene	NA	478.488	1.8978	0.00032685	0.008576	1.3178	5.3014	1.585	no
ENSG00000142046	TMEM91	protein_coding	transmembrane protein 91	738.996	1.8967	0.00064612	0.015825	4.9269	17.9842	1.663	no
ENSG00000198885	ITPRIPL1	protein_coding	ITPRIP like 1	363.756	1.8957	0.001263	0.028737	0.6681	2.6352	1	yes
ENSG00000114796	KLHL24	protein_coding	kelch like family member 24	3274.31	1.8939	0.0007909	0.018916	4.5587	15.4608	1.415	yes
ENSG00000009413	REV3L	protein_coding	REV3 like, DNA directed polymerase zeta catalytic subunit	24128.7	1.8921	5.8889e-07	2.398e-05	24.6053	78.7772	1.6215	no
ENSG00000173482	PTPRM	protein_coding	protein tyrosine phosphatase receptor type M	28962.4	1.8906	1.609e-11	1.0192e-09	35.8124	127.765	1.8018	no
ENSG00000135338	LCA5	protein_coding	lebercilin LCA5	1716.16	1.8881	1.8472e-07	8.033e-06	1.9692	6.7615	1.415	yes
ENSG00000170276	HSPB2	protein_coding	heat shock protein family B (small) member 2	744.508	1.8859	0.0033499	0.068	7.6821	23.6276	1.4739	no
ENSG00000185565	LSAMP	protein_coding	limbic system associated membrane protein	2823.62	1.8839	0.0005577	0.013945	3.2835	10.9749	1.585	yes
ENSG00000108387	SEPT4	protein_coding	septin 4	579.205	1.8827	0.0015903	0.035415	2.3588	8.1101	1.585	yes
ENSG00000185432	METTL7A	protein_coding	methyltransferase like 7A	11986.6	1.8808	2.1547e-05	0.00070083	29.89	95.2171	1.6308	yes
ENSG00000001561	ENPP4	protein_coding	ectonucleotide pyrophosphatase/phosphodiesterase 4	1296.85	1.877	1.3691e-06	5.2866e-05	1.4839	4.8716	1.585	no
ENSG00000000971	CFH	protein_coding	complement factor H	49705.6	1.8741	4.0122e-09	2.0932e-07	75.9654	263.972	1.7831	yes
ENSG00000235688	AC116614.1	antisense	NA	564.332	1.8721	4.8042e-06	0.00017216	11.0532	37.7892	1.7004	no
ENSG00000154654	NCAM2	protein_coding	neural cell adhesion molecule 2	3111.59	1.8684	3.8962e-08	1.851e-06	3.2655	11.3848	1.585	no
ENSG00000120594	PLXDC2	protein_coding	plexin domain containing 2	7129.19	1.8657	8.7005e-08	3.9709e-06	6.258	22.6383	1.7776	yes
ENSG00000126561	STAT5A	protein_coding	signal transducer and activator of transcription 5A	2597.93	1.8634	1.3257e-07	5.8962e-06	5.6067	20.3709	1.585	yes
ENSG00000143303	RRNAD1	protein_coding	ribosomal RNA adenine dimethylase domain containing 1	1280.46	1.8629	5.236e-06	0.00018677	8.6523	27.8877	1.5361	no
ENSG00000243953	RP11-439C8.2	lincRNA	uncharacterized LOC105374171	196.189	1.8618	0.004119	0.0811	3.7537	14.0727	1.585	no
ENSG00000173531	MST1	protein_coding	macrophage stimulating 1	1196.95	1.8617	0.00044729	0.011411	5.0443	19.2239	1.737	no
ENSG00000163734	CXCL3	protein_coding	C-X-C motif chemokine ligand 3	702.124	1.8617	0.0016194	0.03591	3.4278	12.6021	1.8074	no
ENSG00000170271	FAXDC2	protein_coding	fatty acid hydroxylase domain containing 2	1729.33	1.8598	3.7922e-08	1.8071e-06	5.6053	17.5383	1.4406	yes
ENSG00000136960	ENPP2	protein_coding	ectonucleotide pyrophosphatase/phosphodiesterase 2	8234.56	1.859	1.5138e-07	6.6571e-06	17.5957	59.457	1.659	no
ENSG00000124813	RUNX2	protein_coding	RUNX family transcription factor 2	4354.19	1.8584	6.3698e-08	2.9589e-06	8.9882	30.1604	1.6323	yes
ENSG00000108960	MMD	protein_coding	monocyte to macrophage differentiation associated	3977.15	1.8544	1.2345e-06	4.8024e-05	12.0094	39.2577	1.6215	no
ENSG00000154678	PDE1C	protein_coding	phosphodiesterase 1C	3797.83	1.8498	1.0105e-05	0.00034402	4.7715	14.9506	1.415	no
ENSG00000132837	DMGDH	protein_coding	dimethylglycine dehydrogenase	280.401	1.8446	0.00054592	0.013694	1.216	4.0451	1.3219	no
ENSG00000108950	FAM20A	protein_coding	FAM20A golgi associated secretory pathway pseudokinase	7039.25	1.8436	7.8173e-08	3.5835e-06	20.839	75.2517	1.7885	yes
ENSG00000088448	ANKRD10	protein_coding	ankyrin repeat domain 10	7658.54	1.8434	2.0433e-06	7.7283e-05	128.435	399.06	1.6326	no
ENSG00000140511	HAPLN3	protein_coding	hyaluronan and proteoglycan link protein 3	4875.14	1.8428	1.5892e-10	9.3138e-09	16.5929	54.7622	1.6374	no
ENSG00000188313	PLSCR1	protein_coding	phospholipid scramblase 1	4476.64	1.8388	2.0054e-09	1.0657e-07	25.6288	84.0505	1.6545	no
ENSG00000183723	CMTM4	protein_coding	CKLF like MARVEL transmembrane domain containing 4	7944.44	1.8369	9.328e-08	4.2327e-06	8.2324	27.9438	1.6881	no
ENSG00000240694	PNMA2	protein_coding	PNMA family member 2	1661.61	1.8351	8.7355e-06	0.00030033	2.526	8.5833	1.3219	yes
ENSG00000144115	THNSL2	protein_coding	threonine synthase like 2	520.706	1.8332	0.0052722	0.0998	1.5632	4.9304	1	no
ENSG00000165424	ZCCHC24	protein_coding	zinc finger CCHC-type containing 24	17364.1	1.8327	7.9265e-06	0.00027493	18.8917	67.5966	1.7866	yes
ENSG00000166033	HTRA1	protein_coding	HtrA serine peptidase 1	66160.8	1.8295	1.127e-05	0.00037916	250.098	829.111	1.7254	yes
ENSG00000166510	CCDC68	protein_coding	coiled-coil domain containing 68	5918.52	1.8249	4.7261e-08	2.2284e-06	11.0523	37.9593	1.7004	yes
ENSG00000071967	CYBRD1	protein_coding	cytochrome b reductase 1	57751.1	1.8233	9.9938e-10	5.4878e-08	82.076	270	1.7071	yes
ENSG00000056998	GYG2	protein_coding	glycogenin 2	541.495	1.8179	0.0001327	0.0037452	1.1438	3.8313	1.3219	yes
ENSG00000180573	HIST1H2AC	protein_coding	H2A clustered histone 6	2575.17	1.8146	8.8248e-06	0.00030274	9.5888	32.0084	1.585	yes
ENSG00000234487	HLA-F	protein_coding	major histocompatibility complex, class I, F	238.349	1.8146	0.0032386	0.0662	1.6657	5.8057	1.2224	no
ENSG00000119950	MXI1	protein_coding	MAX interactor 1, dimerization protein	1743.63	1.8116	3.5088e-05	0.0011024	4.3985	13.9397	1.585	no
ENSG00000234741	GAS5	processed_transcript	growth arrest specific 5	18606	1.8114	3.379e-06	0.00012348	234.827	753.199	1.6758	yes
ENSG00000104415	WISP1	protein_coding	cellular communication network factor 4	39469	1.807	2.4886e-08	1.2135e-06	44.0158	155.439	1.7935	yes
ENSG00000148926	ADM	protein_coding	adrenomedullin	24213.9	1.7983	0.00010017	0.0028841	112.44	338.963	1.5892	yes
ENSG00000229152	ANKRD10-IT1	sense_intronic	NA	1196.5	1.7954	1.7935e-06	6.8748e-05	13.5191	37.1926	1.341	no
ENSG00000119927	GPAM	protein_coding	glycerol-3-phosphate acyltransferase, mitochondrial	11009	1.7891	1.1514e-08	5.7857e-07	9.2521	31.2872	1.6781	no
ENSG00000153064	BANK1	protein_coding	B cell scaffold protein with ankyrin repeats 1	657.345	1.784	0.00014425	0.0040518	1.2694	3.9444	1.3219	no
ENSG00000142089	IFITM3	protein_coding	interferon induced transmembrane protein 3	50082.2	1.782	0.00020335	0.0055881	835.638	2563.92	1.6157	yes
ENSG00000181374	CCL13	protein_coding	C-C motif chemokine ligand 13	1097.49	1.78	0.00049055	0.012414	10.3151	34.1814	1.6699	yes
ENSG00000105835	NAMPT	protein_coding	nicotinamide phosphoribosyltransferase	10687.3	1.7678	1.3002e-06	5.0332e-05	21.0514	69.779	1.6903	no
ENSG00000259345	RP11-624L4.1	lincRNA	NA	1430.27	1.7623	0.00026532	0.0071226	16.4978	42.8638	1.372	no
ENSG00000254860	TMEM9B-AS1	antisense	TMEM9B antisense RNA 1	555.175	1.7606	0.0011177	0.025675	5.5165	17.5919	1.4406	no
ENSG00000101955	SRPX	protein_coding	sushi repeat containing protein X-linked	44179.6	1.7602	1.9635e-05	0.00064065	159.406	491.947	1.6235	yes
ENSG00000175155	YPEL2	protein_coding	yippee like 2	2668.46	1.758	9.3989e-08	4.2464e-06	3.2926	9.4862	1.3219	yes
ENSG00000144802	NFKBIZ	protein_coding	NFKB inhibitor zeta	3113.93	1.7563	2.0597e-06	7.7808e-05	8.5757	29.6619	1.6323	yes
ENSG00000145623	OSMR	protein_coding	oncostatin M receptor	30658.7	1.7543	1.8801e-08	9.2838e-07	36.3906	114.804	1.6485	no
ENSG00000038427	VCAN	protein_coding	versican	207666	1.7523	1.3322e-09	7.2269e-08	167.129	505.199	1.5907	no
ENSG00000159399	HK2	protein_coding	hexokinase 2	9629.35	1.7522	4.9549e-07	2.0335e-05	9.0589	31.0898	1.6781	no
ENSG00000109099	PMP22	protein_coding	peripheral myelin protein 22	11783.4	1.7518	5.75e-06	0.00020372	42.7737	132.232	1.5959	yes
ENSG00000151748	SAV1	protein_coding	salvador family WW domain containing protein 1	4856.75	1.7517	9.0846e-07	3.6102e-05	10.847	35.2265	1.585	no
ENSG00000197971	MBP	protein_coding	myelin basic protein	484.755	1.7493	0.0036375	0.0728	1.8556	5.2055	1	no
ENSG00000103145	HCFC1R1	protein_coding	host cell factor C1 regulator 1	2089.76	1.7377	0.00021154	0.0058029	24.0813	77.7554	1.6599	yes
ENSG00000119729	RHOQ	protein_coding	ras homolog family member Q	15643.4	1.736	2.641e-07	1.1264e-05	24.6965	76.0181	1.5663	no
ENSG00000138792	ENPEP	protein_coding	glutamyl aminopeptidase	1142.87	1.732	0.0023754	0.0503	1.0997	3.6452	1.3219	no
ENSG00000112320	SOBP	protein_coding	sine oculis binding protein homolog	1870.02	1.7231	0.0024456	0.0516	2.2121	8.8129	1.737	no
ENSG00000244694	PTCHD4	protein_coding	patched domain containing 4	1126.57	1.7209	0.00033973	0.0088917	2.0541	6.3534	1.2224	yes
ENSG00000167216	KATNAL2	protein_coding	katanin catalytic subunit A1 like 2	620.557	1.7188	0.00027302	0.0073104	4.3397	11.4927	1.263	no
ENSG00000232807	RP11-536K7.3	antisense	NA	569.655	1.7161	0.0026838	0.0557	2.0958	7.3733	1.415	no
ENSG00000165030	NFIL3	protein_coding	nuclear factor, interleukin 3 regulated	13603	1.7157	1.8879e-06	7.1987e-05	40.8299	127.353	1.6077	no
ENSG00000124613	ZNF391	protein_coding	zinc finger protein 391	660.3	1.7122	0.0032493	0.0662	1.2714	3.7705	1.3219	no
ENSG00000223745	CCDC18-AS1	processed_transcript	NA	2706.61	1.7091	7.9677e-05	0.0023392	19.6811	51.0017	1.3081	no
ENSG00000248508	SRP14-AS1	lincRNA	SRP14 antisense RNA1 (head to head)	456.586	1.7037	0.0027097	0.0562	1.8695	6.7366	1.415	no
ENSG00000088970	KIZ	protein_coding	kizuna centrosomal protein	2138.07	1.7028	0.00011139	0.0031693	7.3625	22.8037	1.585	no
ENSG00000203780	FANK1	protein_coding	fibronectin type III and ankyrin repeat domains 1	582.333	1.7022	0.0016185	0.03591	3.5311	12.1665	1.3785	no
ENSG00000166912	MTMR10	protein_coding	myotubularin related protein 10	6625.58	1.7021	2.4626e-06	9.1814e-05	9.5631	28.3342	1.3985	no
ENSG00000092529	CAPN3	protein_coding	calpain 3	483.375	1.7016	0.00094529	0.022185	2.5258	7.0942	1	no
ENSG00000096968	JAK2	protein_coding	Janus kinase 2	4723.9	1.7016	0.0013814	0.031183	7.4704	21.5519	1.5236	no
ENSG00000159216	RUNX1	protein_coding	RUNX family transcription factor 1	9771.64	1.7013	5.1638e-06	0.00018441	20.9628	54.8046	1.3479	no
ENSG00000132170	PPARG	protein_coding	peroxisome proliferator activated receptor gamma	1142.72	1.6974	0.0042191	0.0829	4.5641	13.9492	1.3219	yes
ENSG00000275482	EPHB6	protein_coding	EPH receptor B6	1458.85	1.6918	0.001841	0.040368	2.951	9.3012	1.3219	yes
ENSG00000109906	ZBTB16	protein_coding	zinc finger and BTB domain containing 16	3538.45	1.6891	2.1094e-05	0.00068681	12.037	38.0273	1.585	no
ENSG00000087303	NID2	protein_coding	nidogen 2	34214.1	1.6883	6.4173e-08	2.9765e-06	54.1888	165.314	1.5937	no
ENSG00000165655	ZNF503	protein_coding	zinc finger protein 503	6749.68	1.684	0.0009413	0.022125	13.4321	39.0414	1.5146	yes
ENSG00000164292	RHOBTB3	protein_coding	Rho related BTB domain containing 3	45775.3	1.6822	2.2015e-07	9.4817e-06	65.5354	185.216	1.4731	no
ENSG00000225313	RP11-415J8.3	antisense	NA	2661.79	1.6769	0.00019213	0.0053077	30.4209	101.176	1.7182	no
ENSG00000186815	TPCN1	protein_coding	two pore segment channel 1	6477.16	1.6738	0.0036147	0.0724	10.8425	41.6824	1.8413	no
ENSG00000089775	ZBTB25	protein_coding	zinc finger and BTB domain containing 25	3941.69	1.6656	4.2395e-05	0.0013084	4.8975	15.5146	1.5025	no
ENSG00000107249	GLIS3	protein_coding	GLIS family zinc finger 3	3724.27	1.6647	0.00010505	0.0030026	4.6416	13.8854	1.3219	no
ENSG00000100979	PLTP	protein_coding	phospholipid transfer protein	5994.24	1.6634	0.00046157	0.011747	22.4365	63.0236	1.4764	yes
ENSG00000073605	GSDMB	protein_coding	gasdermin B	1718.67	1.6617	7.85e-05	0.0023068	7.0451	19.7029	1.3923	no
ENSG00000196263	ZNF471	protein_coding	zinc finger protein 471	2315.89	1.6611	0.0015861	0.035346	5.0129	18.7748	1.737	no
ENSG00000165392	WRN	protein_coding	WRN RecQ like helicase	3611.6	1.6576	6.7698e-05	0.0020101	4.4939	15.1679	1.6781	no
ENSG00000164066	INTU	protein_coding	inturned planar cell polarity protein	6567.28	1.6548	0.0036418	0.0728	6.7333	18.2086	1.2479	no
ENSG00000143842	SOX13	protein_coding	SRY-box transcription factor 13	729.875	1.6387	0.00074443	0.018024	1.5792	4.932	1	no
ENSG00000135678	CPM	protein_coding	carboxypeptidase M	19177.6	1.6385	2.7176e-05	0.00087134	32.8169	103.25	1.613	no
ENSG00000109321	AREG	protein_coding	amphiregulin	3645.68	1.6356	0.0019627	0.042647	22.1485	64.6522	1.5208	no
ENSG00000162733	DDR2	protein_coding	discoidin domain receptor tyrosine kinase 2	45321.6	1.6344	2.857e-06	0.00010502	27.1954	80.2531	1.5325	no
ENSG00000138185	ENTPD1	protein_coding	ectonucleoside triphosphate diphosphohydrolase 1	3705.57	1.6338	1.7188e-05	0.00056609	2.3691	6.1816	1.2224	no
ENSG00000260578	CTD-2541J13.1	lincRNA	NA	1336.2	1.6298	0.001544	0.034482	2.6312	7.7458	1.1699	yes
ENSG00000272398	CD24	protein_coding	CD24 molecule	378.376	1.6292	0.0049427	0.0945	1.3777	3.5061	1.3219	yes
ENSG00000198839	ZNF277	protein_coding	zinc finger protein 277	2750.56	1.6284	0.00062088	0.015317	10.0726	30.5961	1.5406	no
ENSG00000180354	MTURN	protein_coding	maturin, neural progenitor differentiation regulator homolog	3051.51	1.6136	0.0042352	0.0832	4.2333	13.5897	1.585	no
ENSG00000148344	PTGES	protein_coding	prostaglandin E synthase	1232.85	1.6133	0.0043806	0.0854	4.6487	13.1904	1.2224	yes
ENSG00000259291	RP11-617F23.1	antisense	ZNF710 antisense RNA 1	720.573	1.6131	0.00082867	0.019759	2.6611	7.7172	1.1699	no
ENSG00000171105	INSR	protein_coding	insulin receptor	1230.96	1.603	0.00014854	0.0041621	1.1362	3.1791	1	no
ENSG00000168209	DDIT4	protein_coding	DNA damage inducible transcript 4	37526.4	1.5986	0.0046975	0.0906	179.24	466.847	1.3785	yes
ENSG00000166741	NNMT	protein_coding	nicotinamide N-methyltransferase	89152.9	1.5982	0.0020343	0.043843	703.544	2074.71	1.5581	no
ENSG00000091136	LAMB1	protein_coding	laminin subunit beta 1	98464	1.5972	1.264e-05	0.00042344	139.477	413.072	1.5642	no
ENSG00000163739	CXCL1	protein_coding	C-X-C motif chemokine ligand 1	4203.75	1.5963	0.0002972	0.0078573	37.3463	108.426	1.5203	no
ENSG00000119138	KLF9	protein_coding	Kruppel like factor 9	14809.2	1.5952	6.776e-06	0.00023792	18.2053	48.8153	1.3959	no
ENSG00000127863	TNFRSF19	protein_coding	TNF receptor superfamily member 19	12531.3	1.5906	7.0151e-05	0.002081	20.3049	57.7881	1.4903	yes
ENSG00000251022	THAP9-AS1	antisense	THAP9 antisense RNA 1	6343.89	1.5851	4.7878e-05	0.0014617	30.985	78.8571	1.3219	no
ENSG00000166444	ST5	protein_coding	DENN domain containing 2B	12400.1	1.5831	8.0839e-05	0.0023667	62.295	155.472	1.3081	yes
ENSG00000166979	EVA1C	protein_coding	eva-1 homolog C	1348.65	1.5821	0.0052059	0.0987	6.7701	19.8983	1.3923	no
ENSG00000107984	DKK1	protein_coding	dickkopf WNT signaling pathway inhibitor 1	20180.4	1.576	0.00064582	0.015825	105.631	295.842	1.4729	no
ENSG00000105373	GLTSCR2	protein_coding	NOP53 ribosome biogenesis factor	16636.3	1.5757	0.0030857	0.0633	115.549	298.861	1.3585	yes
ENSG00000157240	FZD1	protein_coding	frizzled class receptor 1	11240.2	1.5728	0.0050681	0.0966	10.1587	28.5122	1.4475	yes
ENSG00000146122	DAAM2	protein_coding	dishevelled associated activator of morphogenesis 2	11031.7	1.5728	0.00014434	0.0040518	11.0224	34.0776	1.5443	no
ENSG00000120832	MTERF2	protein_coding	mitochondrial transcription termination factor 2	2015.09	1.5647	0.0016761	0.037011	6.2988	17.1593	1.3626	no
ENSG00000128536	CDHR3	protein_coding	cadherin related family member 3	664.945	1.5647	0.0022734	0.048426	4.3889	10.7362	1.263	yes
ENSG00000163431	LMOD1	protein_coding	leiomodin 1	6573.59	1.5637	0.0011572	0.026523	10.8332	30.3084	1.3692	no
ENSG00000168300	PCMTD1	protein_coding	protein-L-isoaspartate (D-aspartate) O-methyltransferase domain containing 1	5061.64	1.5612	0.0013283	0.03007	9.766	29.1259	1.4475	no
ENSG00000226742	HSBP1L1	protein_coding	heat shock factor binding protein 1 like 1	1517.63	1.5573	0.0026286	0.0548	18.6093	50.2023	1.3505	yes
ENSG00000157214	STEAP2	protein_coding	STEAP2 metalloreductase	5909.99	1.5384	0.00036634	0.0095088	6.7238	18.1346	1.2479	no
ENSG00000089123	TASP1	protein_coding	taspase 1	2044.25	1.5364	0.0034725	0.0702	6.8639	19.2989	1.3219	no
ENSG00000144824	PHLDB2	protein_coding	pleckstrin homology like domain family B member 2	9975.68	1.5323	0.00090483	0.021364	19.3064	52.8546	1.433	no
ENSG00000166436	TRIM66	protein_coding	tripartite motif containing 66	1324.64	1.5282	0.0048697	0.0933	2.6165	6.5905	1	no
ENSG00000186854	TRABD2A	protein_coding	TraB domain containing 2A	1407.76	1.5269	0.00083214	0.019826	4.5361	11.9915	1.1155	no
ENSG00000049239	H6PD	protein_coding	hexose-6-phosphate dehydrogenase/glucose 1-dehydrogenase	47590.2	1.5193	0.0010286	0.023889	31.5047	93.7512	1.5255	no
ENSG00000157551	KCNJ15	protein_coding	potassium inwardly rectifying channel subfamily J member 15	1371.32	1.5166	0.0019807	0.042801	7.4103	16.4344	1.0875	no
ENSG00000213742	ZNF337-AS1	antisense	ZNF337 antisense RNA 1	976.798	1.5138	0.0040772	0.0805	3.2504	9.2269	1.3219	no
ENSG00000003402	CFLAR	protein_coding	CASP8 and FADD like apoptosis regulator	28544.5	1.5125	0.00051055	0.012889	66.462	182.502	1.4575	no
ENSG00000140545	MFGE8	protein_coding	milk fat globule EGF and factor V/VIII domain containing	100410	1.5104	0.00097967	0.022838	474.894	1405.33	1.5626	yes
ENSG00000132640	BTBD3	protein_coding	BTB domain containing 3	5535.14	1.5094	0.00016012	0.0044627	9.4269	23.0162	1.263	no
ENSG00000167323	STIM1	protein_coding	stromal interaction molecule 1	10187.6	1.508	0.00058902	0.014644	33.0143	81.7041	1.2876	no
ENSG00000118898	PPL	protein_coding	periplakin	2905.97	1.5073	0.0014226	0.032045	3.9589	10.6342	1.263	yes
ENSG00000270504	RP11-420L9.5	antisense	NA	1187.59	1.5059	0.0044328	0.0862	2.8428	7.8363	1.1699	no
ENSG00000140044	JDP2	protein_coding	Jun dimerization protein 2	1673.4	1.5055	0.0034246	0.0694	9.0072	25.287	1.3785	yes
ENSG00000121440	PDZRN3	protein_coding	PDZ domain containing ring finger 3	4460.42	1.5037	0.00097072	0.022647	9.9117	26.4786	1.2955	no
ENSG00000174738	NR1D2	protein_coding	nuclear receptor subfamily 1 group D member 2	2976.97	1.4998	0.00073398	0.017785	4.7031	10.9187	1	no
ENSG00000128335	APOL2	protein_coding	apolipoprotein L2	8593.2	1.4869	0.0019062	0.041622	37.5094	98.8368	1.3585	no
ENSG00000164463	CREBRF	protein_coding	CREB3 regulatory factor	1861.03	1.4775	0.0022633	0.048242	2.0473	5.7491	1.2224	no
ENSG00000116675	DNAJC6	protein_coding	DnaJ heat shock protein family (Hsp40) member C6	2177.82	1.4737	0.0015345	0.034318	3.8501	9.9426	1.1375	no
ENSG00000164938	TP53INP1	protein_coding	tumor protein p53 inducible nuclear protein 1	5163.21	1.4729	0.00092559	0.021788	5.9204	14.9581	1.1926	yes
ENSG00000164331	ANKRA2	protein_coding	ankyrin repeat family A member 2	2177.11	1.46	0.0031259	0.0641	19.1463	48.6241	1.3219	no
ENSG00000196937	FAM3C	protein_coding	FAM3 metabolism regulating signaling molecule C	21515.9	1.4461	0.0041795	0.0822	65.093	174.778	1.415	no
ENSG00000276107	CTD-2033D15.2	sense_intronic	NA	5216.97	1.4443	0.0035097	0.0709	67.3525	175.313	1.372	no
ENSG00000158470	B4GALT5	protein_coding	beta-1,4-galactosyltransferase 5	10642.8	1.425	0.0026219	0.0547	14.3379	38.7234	1.415	no
ENSG00000152049	KCNE4	protein_coding	potassium voltage-gated channel subfamily E regulatory subunit 4	7832.42	1.4107	0.003298	0.0671	19.4715	45.6236	1.2327	no
ENSG00000173598	NUDT4	protein_coding	nudix hydrolase 4	19552	1.3814	0.0044872	0.0871	35.2472	81.6305	1.2051	no

## Sheet: Patient 6 | Day 9 vs Day 3 | do
ENSEMBL ID	Gene name	Biotype	Description	Base mean	log2 FC	P value	Adjusted P value	Reference expression (TPM)	Sample expression (TPM)	Discrete abs(log2 FC)	Significance in at least two out of three patients?
ENSG00000257453	RP11-290L1.3	antisense	NA	108.43	-10.1492	8.0468e-06	0.00027879	9.583	0	3.4594	no
ENSG00000259185	RP11-56B16.4	antisense	NA	29.3014	-8.2649	2.0008e-07	8.6652e-06	2.0736	0	1.585	no
ENSG00000264720	MIR3117	miRNA	microRNA 3117	21.3118	-7.8029	1.9293e-06	7.3237e-05	10.7562	0	3.585	no
ENSG00000283149	RP11-134F2.8	protein_coding	NA	18.943	-7.631	6.6079e-06	0.00023228	2.2721	0	1.585	no
ENSG00000250657	RP11-1E6.1	processed_transcript	NA	32.8818	-6.329	1.0102e-05	0.00034402	2.743	0	2	yes
ENSG00000212017	MIR548U	miRNA	microRNA 548u	7.3899	-6.2742	0.0026227	0.0547	3.8095	0	2.3219	no
ENSG00000231726	HMGN2P38	processed_pseudogene	NA	7.2551	-6.247	0.0036886	0.0736	3.0757	0	2	no
ENSG00000202184	RNU6-1283P	snRNA	RNA, U6 small nuclear 1283, pseudogene	11.0535	-5.9504	0.0033326	0.0677	2.6183	0	2	no
ENSG00000212724	KRTAP2-3	protein_coding	keratin associated protein 2-3	176.927	-5.9442	5.5645e-22	6.7364e-20	7.3106	0.1143	3	yes
ENSG00000262862	KRTAP2-3	protein_coding	keratin associated protein 2-3	176.927	-5.9442	5.5645e-22	6.7364e-20	7.3106	0.1143	3	yes
ENSG00000279501	bP-2171C21.3	lincRNA	NA	72.3402	-5.8778	2.2378e-11	1.3949e-09	28.6648	0.7105	3.9069	yes
ENSG00000200966	RN7SKP87	misc_RNA	NA	9.8008	-5.666	0.0038017	0.0757	2.4044	0	1.585	no
ENSG00000101188	NTSR1	protein_coding	neurotensin receptor 1	715.794	-5.0616	2.5125e-37	6.4048e-35	4.6505	0.1162	2.585	no
ENSG00000163347	CLDN1	protein_coding	claudin 1	275.7	-5.0082	6.4245e-37	1.6245e-34	2.0579	0.0571	1.585	no
ENSG00000238482	RNU6-1208P	snRNA	RNA, U6 small nuclear 1208, pseudogene	22.9034	-4.8299	0.00012161	0.0034476	7.523	0.3619	3.1699	no
ENSG00000065328	MCM10	protein_coding	minichromosome maintenance 10 replication initiation factor	799.787	-4.647	2.4626e-45	8.3026e-43	5.2807	0.1667	2.585	yes
ENSG00000164161	HHIP	protein_coding	hedgehog interacting protein	966.674	-4.4669	3.9123e-31	7.6193e-29	9.7133	0.3951	3.4594	yes
ENSG00000272707	RP11-534C12.1	lincRNA	NA	18.0207	-4.4319	0.0034524	0.0698	7.7519	0.5424	2.1699	no
ENSG00000262808	KRTAP1-1	protein_coding	keratin associated protein 1-1	112.704	-4.3895	7.8462e-12	5.1147e-10	4.4205	0.1524	2.3219	no
ENSG00000276953	TRBV12-4	TR_V_gene	T cell receptor beta variable 12-4	117.253	-4.3527	4.9387e-12	3.267e-10	16.8978	0.9414	3.1699	yes
ENSG00000028277	POU2F2	protein_coding	POU class 2 homeobox 2	454.34	-4.3285	1.4134e-25	2.071e-23	2.7691	0.1379	2	no
ENSG00000270751	DEAR	antisense	FBXW7 antisense RNA 1	15.6975	-4.328	0.003807	0.0757	2.4133	0.1136	1.585	no
ENSG00000233844	KCNQ5-IT1	sense_intronic	NA	51.2618	-4.2777	5.7511e-05	0.0017339	3.8073	0.1613	2.3219	yes
ENSG00000154146	NRGN	protein_coding	neurogranin	159.384	-4.2381	1.2878e-16	1.1471e-14	4.3722	0.2175	2.3219	yes
ENSG00000127564	PKMYT1	protein_coding	protein kinase, membrane associated tyrosine/threonine 1	809.923	-4.1939	6.3014e-27	9.879e-25	18.7697	0.7705	3.3219	yes
ENSG00000171848	RRM2	protein_coding	ribonucleotide reductase regulatory subunit M2	4067.68	-4.1596	2.0459e-39	5.4364e-37	47.0147	1.9474	4	yes
ENSG00000101057	MYBL2	protein_coding	MYB proto-oncogene like 2	1260.19	-4.1592	1.0093e-44	3.1965e-42	11.5369	0.6075	2.7004	yes
ENSG00000171345	KRT19	protein_coding	keratin 19	131.049	-4.1315	1.4623e-07	6.4577e-06	2.1744	0.1784	1.585	no
ENSG00000128342	LIF	protein_coding	LIF interleukin 6 family cytokine	420.917	-4.0868	4.0395e-05	0.0012528	3.6459	0.098	2.3219	no
ENSG00000257219	RP11-54A9.1	lincRNA	lncRNA osteogenesis associated	473.026	-4.0774	5.0841e-35	1.1986e-32	26.36	1.3757	3.7549	yes
ENSG00000170439	METTL7B	protein_coding	methyltransferase like 7B	572.562	-4.0603	1.0459e-31	2.1022e-29	12.4334	0.6509	2.7004	yes
ENSG00000179750	APOBEC3B	protein_coding	apolipoprotein B mRNA editing enzyme catalytic subunit 3B	296.298	-4.0478	4.1491e-16	3.5066e-14	4.8921	0.273	2.585	yes
ENSG00000117399	CDC20	protein_coding	cell division cycle 20	2145.06	-4.0125	1.2188e-30	2.316e-28	42.1378	2.1649	3.8413	yes
ENSG00000186185	KIF18B	protein_coding	kinesin family member 18B	1216.22	-4.0099	6.6443e-51	2.7412e-48	8.5484	0.5754	2.3219	yes
ENSG00000163814	CDCP1	protein_coding	CUB domain containing protein 1	894.034	-3.9802	6.2438e-44	1.9194e-41	3.8488	0.2408	2.3219	yes
ENSG00000128510	CPA4	protein_coding	carboxypeptidase A4	250.902	-3.9659	0.0026578	0.0553	2.5034	0.1019	2	no
ENSG00000186193	SAPCD2	protein_coding	suppressor APC domain containing 2	550.357	-3.964	1.2428e-16	1.1171e-14	3.754	0.1909	2.3219	yes
ENSG00000183856	IQGAP3	protein_coding	IQ motif containing GTPase activating protein 3	1997.8	-3.9273	1.6625e-80	1.3366e-77	9.3216	0.5289	2.3219	yes
ENSG00000148773	MKI67	protein_coding	marker of proliferation Ki-67	5195.64	-3.8716	2.4363e-61	1.3889e-58	9.7994	0.6419	2.4594	yes
ENSG00000165194	PCDH19	protein_coding	protocadherin 19	4439.76	-3.8397	1.0881e-87	1.1006e-84	11.4104	0.735	2.585	yes
ENSG00000171241	SHCBP1	protein_coding	SHC binding and spindle associated 1	2656.21	-3.8183	7.7425e-52	3.2806e-49	15.3071	0.9669	3	yes
ENSG00000141469	SLC14A1	protein_coding	solute carrier family 14 member 1 (Kidd blood group)	4341.66	-3.8064	1.2417e-46	4.3259e-44	42.8316	2.8228	3.4594	no
ENSG00000200879	SNORD14E	snoRNA	small nucleolar RNA, C/D box 14E	21.6976	-3.7961	0.0047318	0.0912	9.0374	0.6287	2.3219	no
ENSG00000233450	KIFC1	protein_coding	kinesin family member C1	37.2602	-3.6838	4.8838e-05	0.0014882	2.3141	0.1897	1.585	no
ENSG00000121152	NCAPH	protein_coding	non-SMC condensin I complex subunit H	1210.65	-3.6527	1.4148e-35	3.4123e-33	8.2764	0.5423	2.1699	yes
ENSG00000093009	CDC45	protein_coding	cell division cycle 45	550.514	-3.6377	2.8357e-24	3.9168e-22	10.3371	0.899	2.4594	yes
ENSG00000237649	KIFC1	protein_coding	kinesin family member C1	1243.03	-3.6003	2.1727e-30	4.0793e-28	15.2268	1.1364	3	yes
ENSG00000256268	RP11-221N13.3	lincRNA	long intergenic non-protein coding RNA 2454	397.524	-3.5984	1.8275e-21	2.1705e-19	27.0161	1.7886	3.2224	yes
ENSG00000104783	KCNN4	protein_coding	potassium calcium-activated channel subfamily N member 4	460.016	-3.5968	5.6893e-19	6.0266e-17	6.7856	0.5433	2	yes
ENSG00000131153	GINS2	protein_coding	GINS complex subunit 2	541.354	-3.5625	1.3552e-30	2.5598e-28	4.8783	0.3889	2.585	yes
ENSG00000117152	RGS4	protein_coding	regulator of G protein signaling 4	9620.23	-3.5484	1.9963e-50	8.0249e-48	101.128	7.8493	3.5025	yes
ENSG00000243742	RPLP0P2	transcribed_processed_pseudogene	ribosomal protein lateral stalk subunit P0 pseudogene 2	589.024	-3.5378	6.5213e-17	6.0317e-15	6.8195	0.5298	2	no
ENSG00000094804	CDC6	protein_coding	cell division cycle 6	399.599	-3.537	1.6511e-10	9.6404e-09	4.1356	0.2105	2.3219	yes
ENSG00000154127	UBASH3B	protein_coding	ubiquitin associated and SH3 domain containing B	4986.89	-3.5358	2.961e-45	9.6712e-43	24.1196	2.106	3.0589	yes
ENSG00000214676	RPL9P16	processed_pseudogene	ribosomal protein L9 pseudogene 16	42.1801	-3.5195	0.0020786	0.044579	3.6089	0.1989	2.3219	no
ENSG00000106003	LFNG	protein_coding	LFNG O-fucosylpeptide 3-beta-N-acetylglucosaminyltransferase	278.445	-3.516	1.3088e-18	1.3634e-16	3.4357	0.246	2	no
ENSG00000169607	CKAP2L	protein_coding	cytoskeleton associated protein 2 like	1158.36	-3.5018	4.3071e-23	5.4898e-21	6.4313	0.4793	2.8074	yes
ENSG00000129195	FAM64A	protein_coding	PICALM interacting mitotic regulator	569.609	-3.4948	6.7197e-18	6.7531e-16	10.7523	0.7461	2.585	yes
ENSG00000268941	RP5-907D15.4	lincRNA	long intergenic non-protein coding RNA 1711	75.9886	-3.4715	2.6472e-06	9.7995e-05	2.4237	0.2255	1.585	no
ENSG00000105011	ASF1B	protein_coding	anti-silencing function 1B histone chaperone	491.783	-3.4655	4.7688e-15	3.8048e-13	9.4968	0.6122	2.3219	yes
ENSG00000143228	NUF2	protein_coding	NUF2 component of NDC80 kinetochore complex	845.999	-3.4558	1.4988e-14	1.1547e-12	15.7095	1.2372	3.0875	yes
ENSG00000138180	CEP55	protein_coding	centrosomal protein 55	1857.08	-3.4558	5.7835e-40	1.5633e-37	16.6397	1.3811	3.1699	yes
ENSG00000167900	TK1	protein_coding	thymidine kinase 1	2162.2	-3.4139	1.8432e-19	2.0137e-17	43.8007	3.4107	3.4919	yes
ENSG00000221539	SNORD99	snoRNA	small nucleolar RNA, C/D box 99	33.8603	-3.4102	0.00028125	0.0074875	20.5576	1.2818	3.4594	no
ENSG00000267193	RP11-116O18.3	antisense	NA	68.795	-3.4085	0.0003866	0.0099769	9.2458	1.0067	2.3219	no
ENSG00000175063	UBE2C	protein_coding	ubiquitin conjugating enzyme E2 C	1052.16	-3.3972	9.5867e-24	1.2802e-21	48.0108	3.7333	3.2928	yes
ENSG00000156970	BUB1B	protein_coding	BUB1 mitotic checkpoint serine/threonine kinase B	1397.61	-3.3946	5.9757e-33	1.2746e-30	11.1807	1.0203	2.585	yes
ENSG00000280968	MIR3653	miRNA	NA	47.5206	-3.3913	0.00015985	0.0044592	20.1506	1.9388	2.8074	no
ENSG00000126787	DLGAP5	protein_coding	DLG associated protein 5	1927.51	-3.386	1.5178e-32	3.1518e-30	17.4647	1.6081	2.585	yes
ENSG00000249304	RP11-26P13.2	antisense	NA	56.0221	-3.3583	0.00012779	0.003613	7.5129	0.4214	3.1699	no
ENSG00000087586	AURKA	protein_coding	aurora kinase A	1557.91	-3.3551	3.1752e-30	5.8911e-28	18.7035	1.6274	2.737	yes
ENSG00000231906	RP11-541M12.3	processed_pseudogene	NA	40.3375	-3.3393	0.00096547	0.022574	17.0111	1.0964	3.1699	no
ENSG00000175832	ETV4	protein_coding	ETS variant transcription factor 4	661.406	-3.3244	2.251e-15	1.8428e-13	14.2987	1.5152	2.3219	no
ENSG00000277909	SPC25	protein_coding	SPC25 component of NDC80 kinetochore complex	258.583	-3.3059	1.3104e-11	8.385e-10	6.5076	0.7451	2	yes
ENSG00000230902	FAM204CP	processed_pseudogene	family with sequence similarity 204 member C, pseudogene	33.7952	-3.2939	0.00096165	0.022535	2.4091	0.2203	1.585	yes
ENSG00000166396	SERPINB7	protein_coding	serpin family B member 7	235.964	-3.2897	1.918e-12	1.3188e-10	3.3875	0.371	2	no
ENSG00000142945	KIF2C	protein_coding	kinesin family member 2C	1557.79	-3.2879	7.7116e-32	1.5701e-29	14.5781	1.4229	3	yes
ENSG00000157193	LRP8	protein_coding	LDL receptor related protein 8	2381.44	-3.2846	7.3235e-50	2.8003e-47	15.2069	1.5049	2.415	yes
ENSG00000118094	TREH	protein_coding	trehalase	226.017	-3.2687	1.7663e-09	9.4511e-08	4.0434	0.429	2.3219	no
ENSG00000206455	TCF19	protein_coding	transcription factor 19	427.236	-3.2585	3.4282e-15	2.7491e-13	3.1805	0.255	2	no
ENSG00000234674	TCF19	protein_coding	transcription factor 19	427.236	-3.2585	3.4282e-15	2.7491e-13	3.1805	0.255	2	no
ENSG00000092853	CLSPN	protein_coding	claspin	1424.03	-3.2488	4.0517e-33	8.7615e-31	5.8171	0.5192	1.8074	yes
ENSG00000138316	ADAMTS14	protein_coding	ADAM metallopeptidase with thrombospondin type 1 motif 14	4596.95	-3.2416	1.0944e-29	1.995e-27	16.2911	1.9836	2.5025	yes
ENSG00000164850	GPER1	protein_coding	G protein-coupled estrogen receptor 1	449.411	-3.2387	8.4546e-10	4.6672e-08	4.3077	0.3853	2.3219	no
ENSG00000137310	TCF19	protein_coding	transcription factor 19	727.016	-3.2208	2.4006e-20	2.7371e-18	5.5205	0.5682	1.8074	yes
ENSG00000013810	TACC3	protein_coding	transforming acidic coiled-coil containing protein 3	2070.72	-3.2087	3.6869e-34	8.1411e-32	24.6839	2.5635	2.7004	yes
ENSG00000134690	CDCA8	protein_coding	cell division cycle associated 8	1128.28	-3.2066	2.6295e-30	4.9077e-28	10.8892	1.2298	2.585	yes
ENSG00000137877	SPTBN5	protein_coding	spectrin beta, non-erythrocytic 5	1356.66	-3.1964	6.7629e-26	1.0244e-23	3.7885	0.3459	2.3219	no
ENSG00000135451	TROAP	protein_coding	trophinin associated protein	823.741	-3.1887	3.9621e-23	5.0707e-21	16.5823	1.723	2.585	yes
ENSG00000168078	PBK	protein_coding	PDZ binding kinase	1394.58	-3.1852	1.4116e-23	1.8597e-21	18.6209	2.019	2.737	yes
ENSG00000166851	PLK1	protein_coding	polo like kinase 1	2356.97	-3.1789	7.8685e-25	1.1164e-22	26.2541	2.6494	2.7549	yes
ENSG00000066279	ASPM	protein_coding	assembly factor for spindle microtubules	2772	-3.1768	4.4754e-43	1.3238e-40	7.6989	0.7258	2.1699	yes
ENSG00000011426	ANLN	protein_coding	anillin actin binding protein	6747.57	-3.1625	7.4724e-44	2.2747e-41	33.9039	3.6196	2.8074	yes
ENSG00000149090	PAMR1	protein_coding	peptidase domain containing associated with muscle regeneration 1	2417.85	-3.1445	1.5868e-34	3.5287e-32	21.6241	2.3674	2.9386	yes
ENSG00000169679	BUB1	protein_coding	BUB1 mitotic checkpoint serine/threonine kinase	1763.5	-3.1361	7.2906e-35	1.6565e-32	12.907	1.4991	2.8074	yes
ENSG00000137807	KIF23	protein_coding	kinesin family member 23	1809.37	-3.133	1.1403e-29	2.0666e-27	18.8478	1.9813	2.737	yes
ENSG00000024526	DEPDC1	protein_coding	DEP domain containing 1	1347.96	-3.1317	7.0271e-26	1.0593e-23	6.5595	0.7666	2	yes
ENSG00000167552	TUBA1A	protein_coding	tubulin alpha 1a	40757.5	-3.1143	3.2287e-26	4.9626e-24	616.754	68.0289	3.1629	no
ENSG00000089685	BIRC5	protein_coding	baculoviral IAP repeat containing 5	2498.85	-3.0986	4.6704e-22	5.7203e-20	27.6863	3.4558	2.858	yes
ENSG00000011347	SYT7	protein_coding	synaptotagmin 7	2835.17	-3.0972	2.4205e-29	4.3369e-27	15.2304	1.8129	2.415	yes
ENSG00000075218	GTSE1	protein_coding	G2 and S-phase expressed 1	1157.24	-3.0951	7.4034e-21	8.5343e-19	10.2847	1.1745	2.4594	yes
ENSG00000154133	ROBO4	protein_coding	roundabout guidance receptor 4	170.762	-3.0908	3.7187e-05	0.0011614	2.1708	0.1709	1.585	no
ENSG00000178999	AURKB	protein_coding	aurora kinase B	685.876	-3.0585	4.6483e-12	3.0944e-10	22.6222	2.2578	3	yes
ENSG00000112984	KIF20A	protein_coding	kinesin family member 20A	1772.18	-3.0582	6.4666e-23	8.1758e-21	16.0975	1.7014	2.5025	yes
ENSG00000118193	KIF14	protein_coding	kinesin family member 14	1092.88	-3.046	4.5775e-22	5.6285e-20	3.4508	0.3523	2	yes
ENSG00000205177	C11orf91	protein_coding	chromosome 11 open reading frame 91	54.0412	-3.0397	0.00020115	0.0055375	8.23	0.9492	2.1699	yes
ENSG00000134057	CCNB1	protein_coding	cyclin B1	4080.63	-3.0322	1.392e-27	2.2971e-25	70.6377	8.3537	3	yes
ENSG00000101447	FAM83D	protein_coding	family with sequence similarity 83 member D	1014.24	-3.0317	2.2573e-17	2.1845e-15	10.9858	1.0885	2.585	yes
ENSG00000122952	ZWINT	protein_coding	ZW10 interacting kinetochore protein	1612.58	-3.0299	3.0933e-23	3.9914e-21	23.8444	2.7998	2.6439	yes
ENSG00000165480	SKA3	protein_coding	spindle and kinetochore associated complex subunit 3	676.148	-3.0223	2.3694e-19	2.5706e-17	8.2839	0.8949	2.1699	yes
ENSG00000175592	FOSL1	protein_coding	FOS like 1, AP-1 transcription factor subunit	3449.67	-3.0106	3.5293e-22	4.3568e-20	59.1316	6.8879	2.9069	yes
ENSG00000188229	TUBB4B	protein_coding	tubulin beta 4B class IVb	20269.9	-3.0002	8.5904e-17	7.8528e-15	353.699	39.7978	3.1141	yes
ENSG00000185347	C14orf80	protein_coding	tubulin epsilon and delta complex 1	465.561	-2.9979	1.5169e-08	7.5379e-07	9.4998	0.8684	2.3219	yes
ENSG00000128606	LRRC17	protein_coding	leucine rich repeat containing 17	2004.39	-2.993	3.1383e-23	4.0328e-21	25.5764	2.9108	2.7549	yes
ENSG00000256083	RP11-366L20.3	antisense	NA	94.098	-2.9905	9.1297e-06	0.00031251	10.7517	1.1509	2.585	no
ENSG00000189057	FAM111B	protein_coding	family with sequence similarity 111 member B	668.859	-2.99	1.2382e-25	1.8227e-23	4.5745	0.5135	1.585	yes
ENSG00000085999	RAD54L	protein_coding	RAD54 like	460.324	-2.9899	4.6542e-11	2.8281e-09	5.3137	0.8388	1.585	yes
ENSG00000179431	FJX1	protein_coding	four-jointed box kinase 1	3761.12	-2.989	1.0705e-17	1.0622e-15	38.4321	4.5032	2.7004	yes
ENSG00000266235	MIR3176	miRNA	microRNA 3176	50.3615	-2.9864	0.00049341	0.012477	16.2159	2.8708	2.0875	no
ENSG00000123485	HJURP	protein_coding	Holliday junction recognition protein	901.47	-2.9854	1.026e-19	1.1489e-17	9.2868	1.1512	2.3219	yes
ENSG00000165244	ZNF367	protein_coding	zinc finger protein 367	397.476	-2.9676	3.6068e-15	2.885e-13	2.2742	0.2846	1.585	yes
ENSG00000090889	KIF4A	protein_coding	kinesin family member 4A	1329.38	-2.9665	1.1947e-26	1.8453e-24	6.5348	0.8004	2	yes
ENSG00000117724	CENPF	protein_coding	centromere protein F	4841.71	-2.9664	8.0137e-28	1.3295e-25	20.3802	2.7045	2.3923	yes
ENSG00000101412	E2F1	protein_coding	E2F transcription factor 1	504.974	-2.9611	2.3145e-13	1.6956e-11	4.4564	0.5594	1.3219	yes
ENSG00000281165	SLC2A6	protein_coding	solute carrier family 2 member 6	487.344	-2.954	2.7615e-11	1.7112e-09	6.612	0.7238	2	no
ENSG00000160326	SLC2A6	protein_coding	solute carrier family 2 member 6	487.344	-2.954	2.7615e-11	1.7112e-09	6.612	0.7238	2	no
ENSG00000146670	CDCA5	protein_coding	cell division cycle associated 5	945.007	-2.934	4.3448e-10	2.4724e-08	12.3222	1.3989	2.7004	yes
ENSG00000104368	PLAT	protein_coding	plasminogen activator, tissue type	7736.77	-2.9323	8.7283e-24	1.1746e-21	71.2946	8.5517	2.848	yes
ENSG00000178734	LMO7DN	protein_coding	LMO7 downstream neighbor	81.1456	-2.9089	4.4236e-05	0.0013572	2.0406	0.2944	1.585	no
ENSG00000197594	ENPP1	protein_coding	ectonucleotide pyrophosphatase/phosphodiesterase 1	5971.63	-2.9054	4.2257e-20	4.7833e-18	48.1575	6.0349	2.8074	yes
ENSG00000123416	TUBA1B	protein_coding	tubulin alpha 1b	116659	-2.8914	1.0402e-19	1.1607e-17	1800.31	224.606	2.9944	yes
ENSG00000137812	KNL1	protein_coding	kinetochore scaffold 1	1626.93	-2.8854	0.0042925	0.084	5.1763	0.4998	2.585	yes
ENSG00000071539	TRIP13	protein_coding	thyroid hormone receptor interactor 13	1580.77	-2.8829	3.778e-18	3.8712e-16	16.6156	1.9625	2.585	yes
ENSG00000109805	NCAPG	protein_coding	non-SMC condensin I complex subunit G	2189.82	-2.8823	7.3342e-18	7.3471e-16	13.8437	1.6536	2.3219	yes
ENSG00000142731	PLK4	protein_coding	polo like kinase 4	789.161	-2.8697	5.1594e-10	2.9044e-08	8.7688	1.017	2.3219	yes
ENSG00000259571	BLID	protein_coding	BH3-like motif containing, cell death inducer	98.7231	-2.8637	0.0019655	0.04268	2.9128	0.4446	2	no
ENSG00000261786	RP4-555D20.2	lincRNA	NA	1787.83	-2.8583	6.1408e-29	1.0697e-26	7.6087	0.8974	2.1699	yes
ENSG00000146950	SHROOM2	protein_coding	shroom family member 2	1380.51	-2.8538	4.8517e-13	3.4732e-11	10.7522	1.3257	2.585	yes
ENSG00000113368	LMNB1	protein_coding	lamin B1	2359.36	-2.8514	6.0447e-27	9.5723e-25	21.9105	2.8909	2.5236	yes
ENSG00000105825	TFPI2	protein_coding	tissue factor pathway inhibitor 2	637.031	-2.8499	1.2193e-08	6.117e-07	9.5709	1.6995	1.8745	yes
ENSG00000182261	NLRP10	protein_coding	NLR family pyrin domain containing 10	418.428	-2.8491	5.0372e-11	3.0315e-09	2.976	0.3581	2	yes
ENSG00000281166	NLRP10	protein_coding	NLR family pyrin domain containing 10	418.428	-2.8491	5.0372e-11	3.0315e-09	2.976	0.3581	2	yes
ENSG00000011332	DPF1	protein_coding	double PHD fingers 1	328.509	-2.8358	1.6745e-09	8.9748e-08	6.3984	1.02	1.8074	yes
ENSG00000186871	ERCC6L	protein_coding	ERCC excision repair 6 like, spindle assembly checkpoint helicase	507.642	-2.8335	8.0826e-13	5.695e-11	2.6369	0.2857	2	yes
ENSG00000109674	NEIL3	protein_coding	nei like DNA glycosylase 3	212.406	-2.8215	5.7615e-09	2.9713e-07	2.2567	0.3114	1.585	yes
ENSG00000135454	B4GALNT1	protein_coding	beta-1,4-N-acetyl-galactosaminyltransferase 1	1250.96	-2.7957	2.3539e-20	2.6936e-18	7.5323	1.0617	2.1699	yes
ENSG00000135318	NT5E	protein_coding	5'-nucleotidase ecto	15048	-2.7945	1.187e-28	2.0339e-26	102.734	13.2791	2.8931	yes
ENSG00000163808	KIF15	protein_coding	kinesin family member 15	379.623	-2.7321	1.8259e-08	9.0303e-07	2.6888	0.3078	2	yes
ENSG00000280610	KIF15	protein_coding	kinesin family member 15	379.623	-2.7321	1.8259e-08	9.0303e-07	2.6888	0.3078	2	yes
ENSG00000082126	MPP4	protein_coding	membrane palmitoylated protein 4	758.626	-2.7296	1.8419e-16	1.5954e-14	9.346	1.1445	2.3219	yes
ENSG00000143631	FLG	protein_coding	filaggrin	2894.98	-2.7255	1.6451e-16	1.449e-14	4.2816	0.7443	1.3219	no
ENSG00000082497	SERTAD4	protein_coding	SERTA domain containing 4	465.207	-2.7169	2.8652e-15	2.3214e-13	2.7598	0.3869	2	no
ENSG00000281230	SERTAD4	protein_coding	SERTA domain containing 4	465.207	-2.7169	2.8652e-15	2.3214e-13	2.7598	0.3869	2	no
ENSG00000173546	CSPG4	protein_coding	chondroitin sulfate proteoglycan 4	5537.72	-2.7122	3.3075e-19	3.5638e-17	12.8248	2.0669	2.2224	yes
ENSG00000112742	TTK	protein_coding	TTK protein kinase	862.167	-2.6962	9.5045e-22	1.1375e-19	7.308	1.0181	2	yes
ENSG00000262748	AC004231.7	protein_coding	NA	659.487	-2.6954	2.6121e-08	1.2678e-06	8.749	1.3276	2.3219	no
ENSG00000138347	MYPN	protein_coding	myopalladin	1641.64	-2.6907	1.3044e-23	1.7257e-21	8.1197	1.1501	2.1699	yes
ENSG00000196155	PLEKHG4	protein_coding	pleckstrin homology and RhoGEF domain containing G4	1720.1	-2.6858	1.6148e-25	2.3549e-23	14.917	2.1672	2.415	no
ENSG00000121211	MND1	protein_coding	meiotic nuclear divisions 1	122.705	-2.6851	0.00037101	0.0096092	3.4214	0.5951	1	yes
ENSG00000113070	HBEGF	protein_coding	heparin binding EGF like growth factor	259.754	-2.6828	8.7693e-10	4.8239e-08	2.7783	0.3932	2	yes
ENSG00000137309	HMGA1	protein_coding	high mobility group AT-hook 1	17329.5	-2.678	9.3844e-14	6.9893e-12	226.505	31.6017	2.7885	yes
ENSG00000115163	CENPA	protein_coding	centromere protein A	392.338	-2.6765	1.5003e-08	7.479e-07	9.8779	1.1894	2.4594	yes
ENSG00000085840	ORC1	protein_coding	origin recognition complex subunit 1	471.363	-2.664	2.2662e-15	1.8505e-13	3.3241	0.4619	2	yes
ENSG00000111206	FOXM1	protein_coding	forkhead box M1	3011.05	-2.6624	4.1472e-18	4.222e-16	21.8714	3.6007	2.2016	yes
ENSG00000188522	FAM83G	protein_coding	family with sequence similarity 83 member G	1170.62	-2.6494	3.0214e-14	2.2938e-12	4.9366	0.6965	1.585	yes
ENSG00000105255	FSD1	protein_coding	fibronectin type III and SPRY domain containing 1	470	-2.6484	3.0679e-12	2.0687e-10	7.6019	1.063	2.1699	yes
ENSG00000110031	LPXN	protein_coding	leupaxin	1142.77	-2.6461	1.8352e-17	1.7982e-15	17.3284	2.6357	2.1699	yes
ENSG00000081181	ARG2	protein_coding	arginase 2	364.032	-2.6321	1.3441e-10	7.892e-09	6.0367	0.9133	1.8074	no
ENSG00000171877	FRMD5	protein_coding	FERM domain containing 5	486.257	-2.6274	8.8673e-08	4.0412e-06	2.5441	0.4221	2	no
ENSG00000111057	KRT18	protein_coding	keratin 18	129.053	-2.6248	0.00052234	0.013144	2.2734	0.3192	1.585	no
ENSG00000139289	PHLDA1	protein_coding	pleckstrin homology like domain family A member 1	13553.8	-2.6227	1.8503e-27	3.0059e-25	47.7046	7.2557	2.6147	no
ENSG00000159363	ATP13A2	protein_coding	ATPase cation transporting 13A2	5716.01	-2.6216	1.3375e-16	1.188e-14	45.1935	6.6921	2.5236	no
ENSG00000112414	ADGRG6	protein_coding	adhesion G protein-coupled receptor G6	545.882	-2.6193	6.9133e-08	3.1925e-06	2.1356	0.3729	1.585	yes
ENSG00000157456	CCNB2	protein_coding	cyclin B2	1333.77	-2.6125	1.8788e-16	1.6228e-14	21.7897	3.2992	2.5236	yes
ENSG00000145247	OCIAD2	protein_coding	OCIA domain containing 2	419.599	-2.6121	5.1039e-09	2.6451e-07	13.2498	1.789	2.2224	no
ENSG00000267650	CTD-2553C6.1	antisense	NA	181.512	-2.6115	9.0302e-07	3.5932e-05	4.1703	0.6547	1.3219	no
ENSG00000076382	SPAG5	protein_coding	sperm associated antigen 5	2052.89	-2.6034	1.2037e-13	8.8808e-12	16.9259	2.7345	2.1699	yes
ENSG00000189320	FAM180A	protein_coding	family with sequence similarity 180 member A	787.088	-2.5912	3.9369e-18	4.0209e-16	11.8989	1.8337	2.1155	yes
ENSG00000110876	SELPLG	protein_coding	selectin P ligand	298.723	-2.5891	1.7985e-09	9.6068e-08	2.9957	0.4922	2	yes
ENSG00000203760	CENPW	protein_coding	centromere protein W	759.032	-2.5861	9.1823e-12	5.9363e-10	36.1819	5.5273	2.4021	no
ENSG00000138675	FGF5	protein_coding	fibroblast growth factor 5	8877.71	-2.5814	3.2205e-29	5.7375e-27	42.485	6.5758	2.4263	yes
ENSG00000117650	NEK2	protein_coding	NIMA related kinase 2	634.76	-2.5782	8.1271e-12	5.2759e-10	8.2153	1.3683	2.1699	yes
ENSG00000166803	KIAA0101	protein_coding	PCNA clamp associated factor	1804.61	-2.571	1.5383e-17	1.5216e-15	65.0522	10.2173	2.585	yes
ENSG00000250748	RP11-230G5.2	lincRNA	uncharacterized LOC105369187	189.84	-2.5638	1.8286e-06	7.0008e-05	5.8417	1.1238	1.8074	no
ENSG00000115884	SDC1	protein_coding	syndecan 1	1551.12	-2.5574	1.1528e-11	7.4371e-10	11.6961	1.795	2.1155	no
ENSG00000182481	KPNA2	protein_coding	karyopherin subunit alpha 2	8754.79	-2.5547	1.6935e-19	1.8631e-17	114.46	18.1292	2.5976	yes
ENSG00000280963	SERTAD4-AS1	antisense	NA	133.613	-2.5486	0.00031595	0.008304	6.9877	1.1252	2	no
ENSG00000203706	SERTAD4-AS1	antisense	NA	133.613	-2.5486	0.00031595	0.008304	6.9877	1.1252	2	no
ENSG00000135476	ESPL1	protein_coding	extra spindle pole bodies like 1, separase	1024.68	-2.5464	7.7446e-13	5.4692e-11	5.5316	0.8538	1.8074	yes
ENSG00000099849	RASSF7	protein_coding	Ras association domain family member 7	246.823	-2.5334	1.2193e-06	4.755e-05	3.7777	0.5097	1.3219	yes
ENSG00000198901	PRC1	protein_coding	protein regulator of cytokinesis 1	3469.14	-2.5284	9.2462e-22	1.1108e-19	36.94	6.139	2.4406	yes
ENSG00000158402	CDC25C	protein_coding	cell division cycle 25C	223.692	-2.5239	8.6996e-06	0.00029943	3.6021	0.5934	1.3219	yes
ENSG00000178531	CTXN1	protein_coding	cortexin 1	167.393	-2.5182	1.8559e-05	0.00060742	3.8175	0.5995	1.3219	no
ENSG00000144136	SLC20A1	protein_coding	solute carrier family 20 member 1	32589.4	-2.5156	1.332e-32	2.7843e-30	307.316	46.1425	2.7122	no
ENSG00000236390	RP11-25B7.1	antisense	NA	75.5834	-2.5152	0.0020649	0.044346	4.5648	0.8112	1.585	no
ENSG00000146410	MTFR2	protein_coding	mitochondrial fission regulator 2	154.632	-2.5118	4.5005e-06	0.00016201	2.6561	0.4531	2	yes
ENSG00000128805	ARHGAP22	protein_coding	Rho GTPase activating protein 22	8688.91	-2.4981	4.5738e-19	4.8945e-17	117.73	19.6309	2.5025	no
ENSG00000139629	GALNT6	protein_coding	polypeptide N-acetylgalactosaminyltransferase 6	1770.22	-2.4895	3.6552e-18	3.7577e-16	12.8321	2.0946	2.2224	yes
ENSG00000118473	SGIP1	protein_coding	SH3GL interacting endocytic adaptor 1	3841.87	-2.4874	4.1821e-18	4.2436e-16	54.9074	9.1588	2.4854	no
ENSG00000005884	ITGA3	protein_coding	integrin subunit alpha 3	15657.8	-2.4807	8.7926e-23	1.1072e-20	93.1174	17.4549	2.3847	yes
ENSG00000075702	WDR62	protein_coding	WD repeat domain 62	633.865	-2.4784	2.0956e-12	1.4315e-10	4.3492	0.8063	1.3219	yes
ENSG00000143476	DTL	protein_coding	denticleless E3 ubiquitin protein ligase homolog	753.297	-2.4767	1.6246e-07	7.0945e-06	4.2958	0.6507	1.3219	yes
ENSG00000088325	TPX2	protein_coding	TPX2 microtubule nucleation factor	5396.95	-2.4766	5.9312e-18	5.9798e-16	32.6646	5.5642	2.2801	yes
ENSG00000165490	DDIAS	protein_coding	DNA damage induced apoptosis suppressor	344.911	-2.4659	1.2814e-09	6.9755e-08	3.7243	0.6818	1.3219	yes
ENSG00000100526	CDKN3	protein_coding	cyclin dependent kinase inhibitor 3	784.604	-2.4625	1.1703e-09	6.3928e-08	28.9445	5.3787	2.3219	yes
ENSG00000149948	HMGA2	protein_coding	high mobility group AT-hook 2	7881.79	-2.4553	7.251e-24	9.7998e-22	53.47	8.7807	2.433	yes
ENSG00000143942	CHAC2	protein_coding	ChaC glutathione specific gamma-glutamylcyclotransferase 2	378.006	-2.4539	3.3065e-06	0.00012098	6.8516	1.124	2	yes
ENSG00000117472	TSPAN1	protein_coding	tetraspanin 1	70.8258	-2.4446	0.0021479	0.045888	2.1983	0.3471	1.585	no
ENSG00000073111	MCM2	protein_coding	minichromosome maintenance complex component 2	1884.33	-2.4404	1.309e-10	7.7008e-09	12.5407	2.035	2.2224	yes
ENSG00000267279	RP11-879F14.2	lincRNA	NA	136.277	-2.4331	6.514e-05	0.0019397	7.4507	1.1872	2	yes
ENSG00000246859	STARD4-AS1	antisense	STARD4 antisense RNA 1	3418.76	-2.4276	6.7758e-16	5.6807e-14	35.8584	6.9438	2.2095	yes
ENSG00000138395	CDK15	protein_coding	cyclin dependent kinase 15	247.388	-2.4222	3.3083e-07	1.3905e-05	5.9105	0.9927	1.8074	no
ENSG00000106089	STX1A	protein_coding	syntaxin 1A	1494.18	-2.4068	1.6497e-10	9.6404e-09	38.9636	8.3524	2.152	yes
ENSG00000167772	ANGPTL4	protein_coding	angiopoietin like 4	23566.9	-2.4065	5.6545e-09	2.9209e-07	344.852	56.4428	2.6017	yes
ENSG00000158125	XDH	protein_coding	xanthine dehydrogenase	279.882	-2.3974	0.0019702	0.042727	2.0542	0.3087	1.585	no
ENSG00000171130	ATP6V0E2	protein_coding	ATPase H+ transporting V0 subunit e2	1105.01	-2.3941	1.715e-08	8.5087e-07	24.9777	3.9333	2.3785	yes
ENSG00000134986	NREP	protein_coding	neuronal regeneration related protein	29951.6	-2.3914	5.6247e-19	5.9784e-17	385.735	70.7246	2.4263	yes
ENSG00000145681	HAPLN1	protein_coding	hyaluronan and proteoglycan link protein 1	31429.1	-2.3891	7.6282e-15	5.9796e-13	149.509	25.9423	2.4835	yes
ENSG00000156113	KCNMA1	protein_coding	potassium calcium-activated channel subfamily M alpha 1	4148.52	-2.3863	6.5297e-15	5.1442e-13	21.8188	3.7223	2.2016	yes
ENSG00000067715	SYT1	protein_coding	synaptotagmin 1	373.63	-2.3855	9.5255e-07	3.7569e-05	2.1775	0.3015	1.585	yes
ENSG00000172020	GAP43	protein_coding	growth associated protein 43	153.648	-2.385	5.6936e-05	0.0017199	2.157	0.3531	1.585	no
ENSG00000127586	CHTF18	protein_coding	chromosome transmission fidelity factor 18	1444.99	-2.3803	7.4328e-07	2.9994e-05	18.5809	3.4215	2.3219	yes
ENSG00000174371	EXO1	protein_coding	exonuclease 1	618.868	-2.3777	1.0102e-06	3.9791e-05	5.3	1.1118	1.585	yes
ENSG00000184661	CDCA2	protein_coding	cell division cycle associated 2	835.5	-2.3717	8.5822e-09	4.3543e-07	5.8597	0.981	1.8074	yes
ENSG00000159763	PIP	protein_coding	prolactin induced protein	128.233	-2.3679	0.0016148	0.035857	9.4984	1.6541	1.737	no
ENSG00000167553	TUBA1C	protein_coding	tubulin alpha 1c	23760	-2.3674	2.1053e-13	1.546e-11	560.351	97.0879	2.5171	yes
ENSG00000187741	FANCA	protein_coding	FA complementation group A	1190.03	-2.36	7.4693e-12	4.9098e-10	19.5108	3.4854	2.3923	yes
ENSG00000164045	CDC25A	protein_coding	cell division cycle 25A	517.917	-2.3574	7.7733e-06	0.00026991	3.6449	0.5303	1.3219	yes
ENSG00000079616	KIF22	protein_coding	kinesin family member 22	1808.2	-2.3484	2.286e-10	1.3176e-08	24.2364	4.2065	2.3219	no
ENSG00000160957	RECQL4	protein_coding	RecQ like helicase 4	1187.52	-2.344	1.9835e-06	7.5201e-05	14.8628	3.1867	2	yes
ENSG00000074416	MGLL	protein_coding	monoglyceride lipase	12614.5	-2.3426	4.4011e-12	2.9361e-10	68.8994	11.6194	2.4288	yes
ENSG00000104356	POP1	protein_coding	POP1 homolog, ribonuclease P/MRP subunit	1397.27	-2.3399	1.7582e-10	1.0228e-08	7.1389	1.3834	2	yes
ENSG00000159231	CBR3	protein_coding	carbonyl reductase 3	661.608	-2.3334	2.2846e-06	8.5893e-05	18.1473	3.4722	2.2479	no
ENSG00000180287	PLD5	protein_coding	phospholipase D family member 5	2207.38	-2.3312	1.3289e-14	1.0263e-12	12.3154	2.5083	1.7004	yes
ENSG00000177602	GSG2	protein_coding	histone H3 associated protein kinase	257.538	-2.3305	8.4947e-06	0.00029302	2.0814	0.3307	1.585	yes
ENSG00000101003	GINS1	protein_coding	GINS complex subunit 1	917.429	-2.3301	4.5869e-08	2.166e-06	6.7704	1.2537	2	yes
ENSG00000162073	PAQR4	protein_coding	progestin and adipoQ receptor family member 4	707.964	-2.3294	2.146e-06	8.0874e-05	6.6218	1.128	2	yes
ENSG00000168496	FEN1	protein_coding	flap structure-specific endonuclease 1	1755.58	-2.3262	2.5883e-09	1.3595e-07	19.6633	3.609	2.0704	yes
ENSG00000258232	RP11-161H23.5	antisense	NA	1495.18	-2.32	4.0039e-08	1.8942e-06	72.0435	13.8609	2.2829	yes
ENSG00000124733	MEA1	protein_coding	male-enhanced antigen 1	196.616	-2.3152	0.0047072	0.0908	4.517	0.6498	1.585	no
ENSG00000100162	CENPM	protein_coding	centromere protein M	335.86	-2.3148	1.5598e-06	5.9937e-05	12.1813	2.2751	2.1155	yes
ENSG00000129810	SGO1	protein_coding	shugoshin 1	228.5	-2.3124	2.7486e-05	0.00088031	2.9785	0.6541	1	yes
ENSG00000112759	SLC29A1	protein_coding	solute carrier family 29 member 1 (Augustine blood group)	1699.46	-2.3093	2.3101e-10	1.329e-08	20.2208	3.6364	2.0704	yes
ENSG00000127423	AUNIP	protein_coding	aurora kinase A and ninein interacting protein	198.877	-2.3045	0.00033296	0.0087217	2.7774	0.3738	2	yes
ENSG00000162062	C16orf59	protein_coding	tubulin epsilon and delta complex 2	270.994	-2.3025	7.188e-05	0.0021262	5.4994	0.9804	1.585	yes
ENSG00000147536	GINS4	protein_coding	GINS complex subunit 4	914.95	-2.2995	1.7273e-07	7.522e-06	12.1669	2.3381	2.1155	yes
ENSG00000229563	LINC01204	lincRNA	long intergenic non-protein coding RNA 1204	280.833	-2.2959	0.00019938	0.0054935	4.3855	0.6664	1.3219	yes
ENSG00000197301	RP11-366L20.2	antisense	HMGA2 antisense RNA 1	1622.26	-2.2932	2.5309e-05	0.00081811	24.4621	4.455	2.3219	no
ENSG00000138160	KIF11	protein_coding	kinesin family member 11	2499.83	-2.2845	1.7418e-16	1.5298e-14	10.2695	1.9239	1.8745	yes
ENSG00000181019	NQO1	protein_coding	NAD(P)H quinone dehydrogenase 1	20065	-2.2831	3.3273e-11	2.0457e-09	316.23	66.1755	2.2422	no
ENSG00000072571	HMMR	protein_coding	hyaluronan mediated motility receptor	1365.75	-2.2789	5.2179e-11	3.1343e-09	10.7579	2.0778	2	yes
ENSG00000145147	SLIT2	protein_coding	slit guidance ligand 2	7660.03	-2.2785	2.9133e-19	3.1499e-17	21.4163	4.3739	2.1375	yes
ENSG00000171320	ESCO2	protein_coding	establishment of sister chromatid cohesion N-acetyltransferase 2	438.675	-2.2734	2.4203e-06	9.0345e-05	3.0284	0.5052	1	yes
ENSG00000106537	TSPAN13	protein_coding	tetraspanin 13	700.509	-2.2724	5.4389e-07	2.2205e-05	8.0965	1.5586	1.585	yes
ENSG00000174600	CMKLR1	protein_coding	chemerin chemokine-like receptor 1	1564.38	-2.2716	4.3165e-10	2.4608e-08	6.0038	1.2853	1.8074	no
ENSG00000147799	ARHGAP39	protein_coding	Rho GTPase activating protein 39	470.536	-2.2695	7.1682e-10	3.9851e-08	2.7707	0.4925	2	no
ENSG00000131747	TOP2A	protein_coding	DNA topoisomerase II alpha	8966.25	-2.262	1.0182e-18	1.0678e-16	34.1916	6.6197	2.1293	yes
ENSG00000230928	RP11-34A14.3	antisense	NA	197.39	-2.2605	0.00045432	0.011581	3.7932	0.8479	1.3219	no
ENSG00000051180	RAD51	protein_coding	RAD51 recombinase	629.038	-2.2592	2.577e-08	1.2527e-06	7.5894	1.4749	2.1699	yes
ENSG00000105486	LIG1	protein_coding	DNA ligase 1	1496.91	-2.2549	6.4559e-08	2.99e-06	14.9504	2.7807	2	yes
ENSG00000276657	PYCRL	protein_coding	pyrroline-5-carboxylate reductase 3	1197.78	-2.2545	1.4374e-06	5.53e-05	12.7116	2.274	2.2224	no
ENSG00000125637	PSD4	protein_coding	pleckstrin and Sec7 domain containing 4	1972.12	-2.2513	1.3433e-08	6.7067e-07	11.8399	2.852	1.7004	yes
ENSG00000100297	MCM5	protein_coding	minichromosome maintenance complex component 5	2329.35	-2.2491	4.3946e-10	2.4963e-08	23.6788	4.6728	2.0589	yes
ENSG00000235121	RP11-90L20.2	antisense	NA	194.201	-2.2454	0.0014393	0.032374	2.7137	0.4534	2	no
ENSG00000168067	MAP4K2	protein_coding	mitogen-activated protein kinase kinase kinase kinase 2	1191.91	-2.2428	8.8008e-07	3.5108e-05	9.3222	1.7226	1.737	no
ENSG00000141682	PMAIP1	protein_coding	phorbol-12-myristate-13-acetate-induced protein 1	498.736	-2.2428	2.8871e-07	1.2233e-05	6.2601	1.1839	1.8074	no
ENSG00000111247	RAD51AP1	protein_coding	RAD51 associated protein 1	515.656	-2.2425	2.851e-08	1.3732e-06	7.2996	1.6077	1.415	yes
ENSG00000128228	SDF2L1	protein_coding	stromal cell derived factor 2 like 1	1219.21	-2.24	2.5511e-05	0.00082379	48.1672	8.1356	2.4448	yes
ENSG00000144339	TMEFF2	protein_coding	transmembrane protein with EGF like and two follistatin like domains 2	414.677	-2.231	0.00023509	0.0063819	3.4511	0.6966	1	no
ENSG00000167114	SLC27A4	protein_coding	solute carrier family 27 member 4	2766.08	-2.2305	8.3204e-08	3.803e-06	19.6544	3.6602	2.0704	no
ENSG00000137312	FLOT1	protein_coding	flotillin 1	880.65	-2.2231	1.1127e-05	0.00037554	16.9351	3.5123	1.848	no
ENSG00000163507	KIAA1524	protein_coding	cellular inhibitor of PP2A	1531.58	-2.2227	4.9073e-12	3.253e-10	11.0413	2.2617	2	yes
ENSG00000229334	AC046143.3	antisense	NA	228.417	-2.2185	8.9247e-05	0.0025863	6.3624	1.2274	1.8074	no
ENSG00000006327	TNFRSF12A	protein_coding	TNF receptor superfamily member 12A	9031.63	-2.2183	2.9163e-07	1.234e-05	250.392	45.2458	2.448	no
ENSG00000135919	SERPINE2	protein_coding	serpin family E member 2	101779	-2.2177	3.0811e-13	2.2311e-11	1090.03	215.991	2.3299	yes
ENSG00000210191	MT-TL2	Mt_tRNA	NA	210.169	-2.2166	0.003583	0.072	78.4422	22.1416	1.7802	no
ENSG00000068489	PRR11	protein_coding	proline rich 11	1732.08	-2.2158	3.5816e-11	2.1977e-09	17.694	3.5169	1.926	yes
ENSG00000167601	AXL	protein_coding	AXL receptor tyrosine kinase	25345.4	-2.211	3.874e-12	2.601e-10	115.29	25.0725	2.1575	yes
ENSG00000198826	ARHGAP11A	protein_coding	Rho GTPase activating protein 11A	2761.29	-2.2105	3.6157e-17	3.4413e-15	17.2919	3.4051	2.1699	yes
ENSG00000104147	OIP5	protein_coding	Opa interacting protein 5	257.104	-2.2102	0.00027162	0.0072792	6.2643	1.4167	1.8074	yes
ENSG00000111665	CDCA3	protein_coding	cell division cycle associated 3	1266.03	-2.2094	7.0325e-11	4.1841e-09	14.6621	2.8301	2	yes
ENSG00000110400	NECTIN1	protein_coding	nectin cell adhesion molecule 1	904.279	-2.2084	2.4346e-07	1.0443e-05	4.6036	0.8934	1.585	no
ENSG00000168140	VASN	protein_coding	vasorin	4386.63	-2.2035	6.9436e-06	0.00024353	32.9619	6.667	2.0875	no
ENSG00000035499	DEPDC1B	protein_coding	DEP domain containing 1B	417.778	-2.2013	1.729e-05	0.00056826	4.225	0.8971	1.3219	yes
ENSG00000169258	GPRIN1	protein_coding	G protein regulated inducer of neurite outgrowth 1	433.142	-2.201	1.9251e-05	0.00062878	2.3043	0.4204	1.585	no
ENSG00000164620	RELL2	protein_coding	RELT like 2	321.866	-2.2009	0.00031254	0.0082352	3.4641	0.6378	1	no
ENSG00000164611	PTTG1	protein_coding	PTTG1 regulator of sister chromatid separation, securin	1590	-2.1988	6.1573e-08	2.8644e-06	66.8011	14.2487	2.1806	yes
ENSG00000258947	TUBB3	protein_coding	tubulin beta 3 class III	8492.04	-2.1964	3.5608e-08	1.7046e-06	134.43	25.5896	2.3219	no
ENSG00000138131	LOXL4	protein_coding	lysyl oxidase like 4	13709.5	-2.1922	2.7417e-11	1.7057e-09	79.0253	16.9207	2.152	yes
ENSG00000102384	CENPI	protein_coding	centromere protein I	895.739	-2.1918	1.0295e-05	0.00034972	11.6776	2.4124	2.1155	yes
ENSG00000119969	HELLS	protein_coding	helicase, lymphoid specific	2183.79	-2.1881	1.4814e-09	7.9808e-08	18.9954	3.4369	2.3219	yes
ENSG00000122966	CIT	protein_coding	citron rho-interacting serine/threonine kinase	1711.79	-2.1849	1.5413e-05	0.0005087	8.8446	2.0755	1.737	yes
ENSG00000123975	CKS2	protein_coding	CDC28 protein kinase regulatory subunit 2	2024.71	-2.1803	1.5005e-07	6.6077e-06	110.296	24.7557	2.094	yes
ENSG00000224093	RP5-1033H22.2	antisense	NA	178.963	-2.1714	0.00071318	0.017308	13.6793	2.9945	1.9069	no
ENSG00000265415	CTD-2510F5.4	antisense	NA	167.522	-2.1691	0.00076853	0.01848	33.9196	7.4169	2.1293	yes
ENSG00000228594	FNDC10	protein_coding	fibronectin type III domain containing 10	191.778	-2.1576	0.0038724	0.0769	2.2462	0.3848	1.585	yes
ENSG00000204713	TRIM27	protein_coding	tripartite motif containing 27	425.501	-2.1547	0.00059918	0.014852	4.3053	1.0892	1.3219	no
ENSG00000231298	LINC00704	lincRNA	mitotically associated long non coding RNA	92.7845	-2.1481	0.0051358	0.0977	2.6129	0.4564	2	no
ENSG00000117632	STMN1	protein_coding	stathmin 1	7677.35	-2.1433	4.7355e-10	2.6801e-08	153.233	31.4634	2.2668	yes
ENSG00000176890	TYMS	protein_coding	thymidylate synthetase	3473.37	-2.1333	2.0788e-08	1.02e-06	57.5714	12.781	2.0753	no
ENSG00000138623	SEMA7A	protein_coding	semaphorin 7A (John Milton Hagen blood group)	12374.4	-2.1296	5.6953e-10	3.2003e-08	81.4777	17.8082	2.1096	yes
ENSG00000110427	KIAA1549L	protein_coding	KIAA1549 like	4470.66	-2.1217	1.0496e-09	5.7535e-08	9.4665	2.3866	1.737	yes
ENSG00000164032	H2AFZ	protein_coding	H2A.Z variant histone 1	11557.7	-2.1195	2.6683e-08	1.2911e-06	340.103	77.2104	2.1282	no
ENSG00000225813	AC009299.4	processed_pseudogene	NA	283.901	-2.1137	4.2579e-05	0.0013127	13.313	2.8878	1.8074	no
ENSG00000241749	RPSAP52	transcribed_processed_pseudogene	ribosomal protein SA pseudogene 52	340.542	-2.1122	3.1435e-05	0.0009926	8.2758	1.8952	1.585	no
ENSG00000131773	KHDRBS3	protein_coding	KH RNA binding domain containing, signal transduction associated 3	709.417	-2.1105	2.6745e-07	1.1379e-05	9.2188	2.0042	1.737	no
ENSG00000206053	HN1L	protein_coding	Jupiter microtubule associated homolog 2	5393.1	-2.1016	2.0772e-12	1.422e-10	43.4769	9.7348	2	yes
ENSG00000185567	AHNAK2	protein_coding	AHNAK nucleoprotein 2	8618.76	-2.0994	4.1789e-17	3.923e-15	18.0724	3.6548	1.926	yes
ENSG00000067225	PKM	protein_coding	pyruvate kinase M1/2	119374	-2.0967	5.9871e-10	3.3582e-08	1325.93	292.969	2.1743	no
ENSG00000132688	NES	protein_coding	nestin	6164.42	-2.096	9.5495e-13	6.6985e-11	20.7395	4.6439	1.8745	yes
ENSG00000144959	NCEH1	protein_coding	neutral cholesterol ester hydrolase 1	1644.64	-2.0926	3.6806e-09	1.9234e-07	7.6749	1.6094	1.585	yes
ENSG00000198805	PNP	protein_coding	purine nucleoside phosphorylase	2824.05	-2.0911	2.6996e-07	1.147e-05	45.2111	9.7289	2.0641	yes
ENSG00000103966	EHD4	protein_coding	EH domain containing 4	5000.97	-2.0895	2.5054e-09	1.3225e-07	15.8286	3.4514	2.0875	yes
ENSG00000079462	PAFAH1B3	protein_coding	platelet activating factor acetylhydrolase 1b catalytic subunit 3	342.32	-2.0887	0.00054775	0.013729	11.8591	2.6684	1.7004	no
ENSG00000213694	S1PR3	protein_coding	sphingosine-1-phosphate receptor 3	2706.07	-2.0884	2.4336e-08	1.1886e-06	10.8931	2.3217	2	yes
ENSG00000198846	TOX	protein_coding	thymocyte selection associated high mobility group box	1829.99	-2.0859	2.0113e-11	1.2588e-09	9.1802	2.0371	1.737	no
ENSG00000092820	EZR	protein_coding	ezrin	7663.33	-2.0833	8.8748e-09	4.4955e-07	55.3976	11.441	2.2224	yes
ENSG00000112186	CAP2	protein_coding	cyclase associated actin cytoskeleton regulatory protein 2	1473.16	-2.083	7.7443e-09	3.9483e-07	10.1636	2.2745	1.8745	yes
ENSG00000132436	FIGNL1	protein_coding	fidgetin like 1	823.237	-2.0693	9.225e-07	3.6475e-05	5.7216	1.3675	1.8074	yes
ENSG00000205683	DPF3	protein_coding	double PHD fingers 3	1539.07	-2.0679	2.7097e-05	0.00087134	15.4324	3.2678	2	yes
ENSG00000100065	CARD10	protein_coding	caspase recruitment domain family member 10	893.83	-2.0644	1.5155e-05	0.00050073	6.993	1.286	2	no
ENSG00000273311	DGCR11	sense_intronic	DiGeorge syndrome critical region gene 11	261.928	-2.0622	2.334e-05	0.00075758	2.5643	0.5948	1	no
ENSG00000236824	BCYRN1	scRNA	brain cytoplasmic RNA 1	317.235	-2.0579	0.001124	0.02578	129.601	29.4056	2.1265	no
ENSG00000161888	SPC24	protein_coding	SPC24 component of NDC80 kinetochore complex	1070.34	-2.0545	1.4113e-07	6.2415e-06	17.4956	3.9522	1.848	yes
ENSG00000180801	ARSJ	protein_coding	arylsulfatase family member J	8310.96	-2.0527	7.6669e-12	5.0187e-10	45.0921	10.5063	1.9386	yes
ENSG00000137267	TUBB2A	protein_coding	tubulin beta 2A class IIa	9707.86	-2.051	1.2909e-06	5.0092e-05	154.493	33.1698	2.1887	no
ENSG00000197646	PDCD1LG2	protein_coding	programmed cell death 1 ligand 2	691.235	-2.0496	4.0085e-06	0.00014547	6.4768	1.3774	1.8074	yes
ENSG00000138311	ZNF365	protein_coding	zinc finger protein 365	583.653	-2.0401	4.8132e-08	2.2626e-06	3.9817	0.8369	1.3219	no
ENSG00000164087	POC1A	protein_coding	POC1 centriolar protein A	582.526	-2.0399	1.3835e-05	0.00046	6.7131	1.5253	1.415	yes
ENSG00000133110	POSTN	protein_coding	periostin	156695	-2.0359	3.3188e-11	2.0444e-09	1077.95	249.173	2.1097	no
ENSG00000101945	SUV39H1	protein_coding	suppressor of variegation 3-9 homolog 1	566.874	-2.035	0.00012907	0.0036461	4.9919	1.126	1.585	yes
ENSG00000184207	PGP	protein_coding	phosphoglycolate phosphatase	1418.23	-2.0348	0.00047119	0.011963	12.8324	2.5631	1.8074	no
ENSG00000189159	HN1	protein_coding	Jupiter microtubule associated homolog 1	8032.77	-2.0341	1.9474e-09	1.0367e-07	228.406	50.3256	2.1668	yes
ENSG00000170312	CDK1	protein_coding	cyclin dependent kinase 1	2302.12	-2.0241	5.6234e-09	2.9096e-07	29.2547	7.0676	1.9069	yes
ENSG00000262045	KRT34	protein_coding	keratin 34	253.247	-2.0189	0.0012793	0.029087	3.2217	0.636	1	no
ENSG00000222032	AC112721.2	lincRNA	NA	190.656	-2.0136	0.00059523	0.014777	11.6223	3.2257	1.7004	yes
ENSG00000138650	PCDH10	protein_coding	protocadherin 10	1228.52	-2.0108	1.886e-06	7.1987e-05	3.4107	0.8438	1	yes
ENSG00000100036	SLC35E4	protein_coding	solute carrier family 35 member E4	1567.77	-2.0087	3.7109e-05	0.0011601	13.7714	3.0783	1.9069	no
ENSG00000182667	NTM	protein_coding	neurotrimin	3129.43	-2.0027	2.5881e-06	9.6151e-05	43.5853	11.6256	1.7914	yes
ENSG00000110104	CCDC86	protein_coding	coiled-coil domain containing 86	2782.73	-1.9998	1.3152e-05	0.00043964	34.6568	7.7179	2	yes
ENSG00000171729	TMEM51	protein_coding	transmembrane protein 51	172.326	-1.9993	0.0028144	0.0582	2.0384	0.4677	1.585	no
ENSG00000081059	TCF7	protein_coding	transcription factor 7	310.247	-1.9916	0.0011912	0.027262	3.46	0.8292	1	no
ENSG00000067057	PFKP	protein_coding	phosphofructokinase, platelet	12352.8	-1.9909	9.7012e-08	4.3704e-06	118.52	27.1677	2.0995	yes
ENSG00000131462	TUBG1	protein_coding	tubulin gamma 1	3202.87	-1.9862	2.924e-08	1.4062e-06	59.227	14.0243	2	yes
ENSG00000183048	SLC25A10	protein_coding	solute carrier family 25 member 10	678.539	-1.978	0.00024975	0.0067392	9.3735	1.8538	1.737	yes
ENSG00000139734	DIAPH3	protein_coding	diaphanous related formin 3	2374.26	-1.9769	1.8119e-10	1.0501e-08	11.1942	2.5722	1.585	yes
ENSG00000100401	RANGAP1	protein_coding	Ran GTPase activating protein 1	8047.1	-1.9738	5.8292e-07	2.3768e-05	59.6764	14.016	2.0238	yes
ENSG00000260549	MT1L	transcribed_unitary_pseudogene	metallothionein 1L, pseudogene	1707.32	-1.9729	1.9939e-05	0.00064988	194.019	49.4737	1.9635	yes
ENSG00000162545	CAMK2N1	protein_coding	calcium/calmodulin dependent protein kinase II inhibitor 1	2062.29	-1.9705	3.9308e-08	1.8646e-06	18.3783	4.4968	1.926	yes
ENSG00000165304	MELK	protein_coding	maternal embryonic leucine zipper kinase	2083.38	-1.966	3.0698e-09	1.6069e-07	20.8105	4.8427	1.8745	yes
ENSG00000078237	TIGAR	protein_coding	TP53 induced glycolysis regulatory phosphatase	2643.83	-1.9594	2.7923e-05	0.00089338	7.7794	2.0895	1.585	no
ENSG00000242114	MTFP1	protein_coding	mitochondrial fission process 1	436.913	-1.9526	5.1151e-05	0.0015541	11.4918	2.8211	1.585	no
ENSG00000138166	DUSP5	protein_coding	dual specificity phosphatase 5	5387.92	-1.9505	2.6432e-08	1.281e-06	46.2427	11.1162	1.9696	yes
ENSG00000092470	WDR76	protein_coding	WD repeat domain 76	987.95	-1.9479	4.1773e-06	0.00015128	6.6046	1.824	1.415	yes
ENSG00000077264	PAK3	protein_coding	p21 (RAC1) activated kinase 3	491.759	-1.945	0.00017637	0.0048981	3.6315	0.9398	1.3219	no
ENSG00000118503	TNFAIP3	protein_coding	TNF alpha induced protein 3	2833.13	-1.9428	4.2486e-07	1.7551e-05	17.2249	4.4529	1.848	no
ENSG00000182809	CRIP2	protein_coding	cysteine rich protein 2	8321.95	-1.9409	8.9654e-05	0.0025957	169.316	39.475	2.0875	no
ENSG00000107338	SHB	protein_coding	SH2 domain containing adaptor protein B	1100.84	-1.9402	9.852e-05	0.0028393	3.8293	0.8332	1.3219	yes
ENSG00000154277	UCHL1	protein_coding	ubiquitin C-terminal hydrolase L1	13870.8	-1.9361	8.333e-06	0.00028807	328.62	82.7708	1.974	yes
ENSG00000139318	DUSP6	protein_coding	dual specificity phosphatase 6	2054.09	-1.9353	1.1136e-06	4.359e-05	14.2533	3.7034	1.585	no
ENSG00000138778	CENPE	protein_coding	centromere protein E	2700.89	-1.9345	2.8018e-05	0.00089553	7.147	1.9375	1.415	yes
ENSG00000276043	UHRF1	protein_coding	ubiquitin like with PHD and ring finger domains 1	1506.29	-1.9329	4.2683e-05	0.0013147	9.1079	1.9883	1.737	no
ENSG00000213190	MLLT11	protein_coding	MLLT11 transcription factor 7 cofactor	3613	-1.9321	8.8967e-08	4.0487e-06	16.9849	4.3066	1.848	no
ENSG00000108639	SYNGR2	protein_coding	synaptogyrin 2	485.155	-1.9265	0.0032552	0.0663	6.9587	1.6764	1.415	no
ENSG00000104522	TSTA3	protein_coding	GDP-L-fucose synthase	2150.64	-1.9264	0.0003482	0.0090831	45.7525	11.6161	1.8541	no
ENSG00000167513	CDT1	protein_coding	chromatin licensing and DNA replication factor 1	772.691	-1.9222	0.00053387	0.013413	7.3323	1.7002	1.415	yes
ENSG00000135905	DOCK10	protein_coding	dedicator of cytokinesis 10	5674.74	-1.9221	8.2175e-08	3.7615e-06	37.2838	9.1523	1.926	yes
ENSG00000179242	CDH4	protein_coding	cadherin 4	3243.44	-1.9204	1.5864e-07	6.9472e-06	8.9324	2.575	1.3219	yes
ENSG00000170955	PRKCDBP	protein_coding	caveolae associated protein 3	4416.7	-1.9185	0.0026838	0.0557	117.925	30.3605	1.9406	no
ENSG00000160886	LY6K	protein_coding	lymphocyte antigen 6 family member K	275.826	-1.9169	0.0050242	0.0958	4.5528	0.9862	1.585	no
ENSG00000233452	STXBP5-AS1	antisense	STXBP5 antisense RNA 1	712.579	-1.9159	2.713e-05	0.00087134	7.1376	1.7767	1.415	no
ENSG00000109685	WHSC1	protein_coding	nuclear receptor binding SET domain protein 2	7384.07	-1.9145	1.9743e-11	1.2381e-09	37.2972	8.8262	1.926	yes
ENSG00000111602	TIMELESS	protein_coding	timeless circadian regulator	2083.13	-1.914	4.7512e-07	1.955e-05	10.3534	2.5478	1.4594	yes
ENSG00000080986	NDC80	protein_coding	NDC80 kinetochore complex component	1192.02	-1.9113	1.109e-05	0.00037511	15.6373	4.3492	1.7655	yes
ENSG00000168237	GLYCTK	protein_coding	glycerate kinase	556.856	-1.9094	0.00021688	0.005939	7.134	1.663	1.415	no
ENSG00000120738	EGR1	protein_coding	early growth response 1	2919.02	-1.9069	2.5288e-08	1.2312e-06	17.4447	4.7165	1.585	no
ENSG00000188486	H2AFX	protein_coding	H2A.X variant histone	2435	-1.905	0.0024617	0.0519	38.9886	9.0048	2	yes
ENSG00000126562	WNK4	protein_coding	WNK lysine deficient protein kinase 4	1033.28	-1.9006	0.00042614	0.010907	6.5897	2.1094	1.415	yes
ENSG00000272894	RP5-1159O4.1	lincRNA	NA	240.363	-1.9	0.00024216	0.0065625	5.6942	1.328	1.8074	no
ENSG00000139641	ESYT1	protein_coding	extended synaptotagmin 1	13229.3	-1.8988	3.233e-07	1.3607e-05	72.8614	19.3607	1.8875	no
ENSG00000142002	DPP9	protein_coding	dipeptidyl peptidase 9	8040.1	-1.8871	7.6626e-08	3.5177e-06	58.3284	16.2838	1.7952	yes
ENSG00000110047	EHD1	protein_coding	EH domain containing 1	6206.43	-1.8852	8.3178e-07	3.3479e-05	48.0758	12.7565	1.8074	no
ENSG00000225830	ERCC6	protein_coding	ERCC excision repair 6, chromatin remodeling factor	8686.96	-1.8816	1.1062e-06	4.3355e-05	37.9187	10.5971	1.7004	yes
ENSG00000231290	APCDD1L-AS1	processed_transcript	APCDD1L divergent transcript	339.77	-1.8799	8.1849e-05	0.0023918	10.0691	2.5087	1.4594	yes
ENSG00000136244	IL6	protein_coding	interleukin 6	205.754	-1.877	0.00068653	0.016752	6.1878	1.4765	1.8074	no
ENSG00000149571	KIRREL3	protein_coding	kirre like nephrin family adhesion molecule 3	415.702	-1.8696	0.00078156	0.018721	4.8668	1.2214	1.585	yes
ENSG00000165046	LETM2	protein_coding	leucine zipper and EF-hand containing transmembrane protein 2	661.936	-1.864	0.00091229	0.021524	9.2079	2.5645	1.3219	no
ENSG00000169432	SCN9A	protein_coding	sodium voltage-gated channel alpha subunit 9	1353	-1.864	9.8052e-08	4.4109e-06	3.1148	0.7322	1	no
ENSG00000197077	KIAA1671	protein_coding	KIAA1671	1352.4	-1.8603	9.5452e-05	0.0027584	2.8925	0.7197	1	no
ENSG00000172009	THOP1	protein_coding	thimet oligopeptidase 1	4621.34	-1.8578	5.3691e-05	0.0016281	78.7622	19.354	2	no
ENSG00000149428	HYOU1	protein_coding	hypoxia up-regulated 1	3719.76	-1.8552	1.8602e-10	1.0741e-08	21.1695	5.2508	1.8745	yes
ENSG00000280682	HYOU1	protein_coding	hypoxia up-regulated 1	3719.76	-1.8552	1.8602e-10	1.0741e-08	21.1695	5.2508	1.8745	yes
ENSG00000176014	TUBB6	protein_coding	tubulin beta 6 class V	23927.3	-1.8548	8.5755e-07	3.434e-05	355.038	90.9554	1.9522	yes
ENSG00000160949	TONSL	protein_coding	tonsoku like, DNA repair protein	962.249	-1.8491	5.5503e-05	0.0016798	3.265	0.8912	1	yes
ENSG00000160447	PKN3	protein_coding	protein kinase N3	625.961	-1.8467	0.0019293	0.042096	4.2136	0.9503	1.3219	no
ENSG00000143801	PSEN2	protein_coding	presenilin 2	795.75	-1.8411	0.0010748	0.024815	10.9554	3.2384	1.585	no
ENSG00000163659	TIPARP	protein_coding	TCDD inducible poly(ADP-ribose) polymerase	9127.86	-1.8401	7.5e-09	3.83e-07	45.2189	12.4738	1.8231	yes
ENSG00000177606	JUN	protein_coding	Jun proto-oncogene, AP-1 transcription factor subunit	5655.6	-1.8375	0.00015927	0.004447	34.5373	8.4754	2	no
ENSG00000013297	CLDN11	protein_coding	claudin 11	15086.3	-1.8368	4.0389e-07	1.6818e-05	155.423	39.0558	1.9635	yes
ENSG00000223749	MIR503HG	lincRNA	NA	1762.43	-1.8366	2.8588e-05	0.00091001	111.98	29.0811	1.9133	yes
ENSG00000187688	TRPV2	protein_coding	transient receptor potential cation channel subfamily V member 2	3990.1	-1.8364	2.6398e-05	0.00085066	41.5959	10.623	1.8413	no
ENSG00000188487	INSC	protein_coding	INSC spindle orientation adaptor protein	1215.14	-1.8359	0.0003447	0.0090068	12.2756	2.9325	1.7004	yes
ENSG00000131470	PSMC3IP	protein_coding	PSMC3 interacting protein	653.587	-1.833	0.00023381	0.0063528	14.1171	3.3719	1.9069	yes
ENSG00000146143	PRIM2	protein_coding	DNA primase subunit 2	3455.73	-1.8314	1.2602e-08	6.3122e-07	42.1263	10.7661	1.8413	yes
ENSG00000135074	ADAM19	protein_coding	ADAM metallopeptidase domain 19	8964.89	-1.8258	4.112e-07	1.7077e-05	24.9789	7.2589	1.7004	yes
ENSG00000267774	RP11-2N1.2	antisense	NA	461.056	-1.8196	0.0018068	0.039729	10.5083	2.4611	2	yes
ENSG00000120437	ACAT2	protein_coding	acetyl-CoA acetyltransferase 2	1556.17	-1.8174	0.00051103	0.012891	13.2026	3.3183	1.8074	no
ENSG00000156299	TIAM1	protein_coding	TIAM Rac1 associated GEF 1	2329.12	-1.8132	3.5277e-06	0.00012862	8.5567	2.4155	1.737	yes
ENSG00000261040	WFDC21P	processed_transcript	WAP four-disulfide core domain 21, pseudogene	1519.41	-1.811	3.3311e-05	0.0010487	102.439	27.4662	1.8791	no
ENSG00000108829	LRRC59	protein_coding	leucine rich repeat containing 59	24561.7	-1.7981	4.3141e-06	0.00015602	172.559	46.8083	1.858	yes
ENSG00000137804	NUSAP1	protein_coding	nucleolar and spindle associated protein 1	1758.98	-1.7961	2.8246e-05	0.00090005	23.2722	6.6805	1.585	yes
ENSG00000040275	SPDL1	protein_coding	spindle apparatus coiled-coil protein 1	3048.98	-1.7957	2.8094e-05	0.00089703	37.0432	9.9671	1.7885	yes
ENSG00000089280	FUS	protein_coding	FUS RNA binding protein	27829.1	-1.7946	2.2481e-08	1.1014e-06	314.876	82.0021	1.9287	no
ENSG00000157870	FAM213B	protein_coding	peroxiredoxin like 2B	1217.75	-1.7943	0.0040312	0.0797	12.09	3.1768	1.7004	no
ENSG00000275125	FAM213B	protein_coding	peroxiredoxin like 2B	1217.75	-1.7943	0.0040312	0.0797	12.09	3.1768	1.7004	no
ENSG00000138092	CENPO	protein_coding	centromere protein O	2119.81	-1.7876	5.4237e-06	0.00019259	14.1601	3.569	1.585	no
ENSG00000164109	MAD2L1	protein_coding	mitotic arrest deficient 2 like 1	1657	-1.7842	9.6442e-05	0.0027845	16.2681	4.4799	1.7655	yes
ENSG00000173540	GMPPB	protein_coding	GDP-mannose pyrophosphorylase B	3663.09	-1.7831	0.0012838	0.029169	33.7661	8.2229	1.9594	no
ENSG00000144749	LRIG1	protein_coding	leucine rich repeats and immunoglobulin like domains 1	2421.96	-1.7801	7.8409e-05	0.0023063	9.5748	2.4784	1.8745	no
ENSG00000282243	LRIG1	protein_coding	NA	2421.96	-1.7801	7.8409e-05	0.0023063	9.5748	2.4784	1.8745	no
ENSG00000168781	PPIP5K1	protein_coding	diphosphoinositol pentakisphosphate kinase 1	1118.36	-1.78	0.0018085	0.039737	18.3221	3.7339	1.926	no
ENSG00000225614	ZNF469	protein_coding	zinc finger protein 469	4290.51	-1.7794	0.00044015	0.011239	5.1298	1.8066	1	yes
ENSG00000161681	SHANK1	protein_coding	SH3 and multiple ankyrin repeat domains 1	607.241	-1.7753	0.0013976	0.031504	10.91	2.7915	1.585	yes
ENSG00000188643	S100A16	protein_coding	S100 calcium binding protein A16	32211.5	-1.7745	0.00028902	0.0076604	671.572	185.331	1.8553	yes
ENSG00000134013	LOXL2	protein_coding	lysyl oxidase like 2	19551.6	-1.7713	2.9177e-05	0.00092596	123.818	34.3505	1.8365	yes
ENSG00000123219	CENPK	protein_coding	centromere protein K	1009.86	-1.7687	0.0015125	0.033899	20.1204	5.5817	1.585	yes
ENSG00000148677	ANKRD1	protein_coding	ankyrin repeat domain 1	10225.4	-1.7685	1.2422e-05	0.00041701	106.061	29.3143	1.8346	yes
ENSG00000121621	KIF18A	protein_coding	kinesin family member 18A	873.474	-1.7673	4.9095e-05	0.0014945	6.2759	1.6963	1.2224	yes
ENSG00000115318	LOXL3	protein_coding	lysyl oxidase like 3	3905.94	-1.7648	6.772e-07	2.7469e-05	35.1706	10.2404	1.7105	no
ENSG00000163535	SGO2	protein_coding	shugoshin 2	1767.25	-1.7643	0.00039221	0.010105	9.899	2.8252	1.4594	yes
ENSG00000108106	UBE2S	protein_coding	ubiquitin conjugating enzyme E2 S	4241.61	-1.7571	0.00064654	0.015825	101.995	27.3144	1.8791	yes
ENSG00000154529	CNTNAP3B	protein_coding	contactin associated protein family member 3B	1655.93	-1.7556	8.3377e-07	3.3517e-05	11.9795	3.2748	1.7004	no
ENSG00000167797	CDK2AP2	protein_coding	cyclin dependent kinase 2 associated protein 2	1130.46	-1.7504	0.0026202	0.0547	21.41	5.2398	1.8745	no
ENSG00000133119	RFC3	protein_coding	replication factor C subunit 3	1089.86	-1.7502	2.9031e-05	0.00092227	10.2539	2.8098	1.4594	yes
ENSG00000125266	EFNB2	protein_coding	ephrin B2	6067.58	-1.7487	0.002321	0.04934	24.0079	7.1705	1.6439	no
ENSG00000125148	MT2A	protein_coding	metallothionein 2A	101092	-1.7486	0.00024443	0.0066184	12487.5	3354.01	1.8962	yes
ENSG00000171208	NETO2	protein_coding	neuropilin and tolloid like 2	5336.67	-1.7468	1.4488e-05	0.00048122	35.5444	9.8807	1.75	yes
ENSG00000239672	NME1	protein_coding	NME/NM23 nucleoside diphosphate kinase 1	9022.57	-1.746	0.00070235	0.017111	238.77	66.775	1.8194	no
ENSG00000187123	LYPD6	protein_coding	LY6/PLAUR domain containing 6	741.722	-1.7456	0.00010565	0.0030171	3.3452	1.0244	1	yes
ENSG00000183671	GPR1	protein_coding	G protein-coupled receptor 1	1559.28	-1.7453	7.7299e-05	0.0022779	17.8587	5.3056	1.663	no
ENSG00000283448	GPR1	protein_coding	G protein-coupled receptor 1	1559.28	-1.7453	7.7299e-05	0.0022779	17.8587	5.3056	1.663	no
ENSG00000173926	44258	protein_coding	membrane associated ring-CH-type finger 3	589.776	-1.7425	0.00011045	0.0031512	9.909	2.5978	1.4594	no
ENSG00000206190	ATP10A	protein_coding	ATPase phospholipid transporting 10A (putative)	6923.04	-1.7374	1.7645e-05	0.00057871	24.1347	7.3623	1.6439	yes
ENSG00000143549	TPM3	protein_coding	tropomyosin 3	34041.3	-1.7309	7.0571e-05	0.0020915	382.46	111.228	1.7738	yes
ENSG00000157111	TMEM171	protein_coding	transmembrane protein 171	1066.73	-1.7294	0.0012249	0.027912	20.9446	5.5659	1.6521	yes
ENSG00000161692	DBF4B	protein_coding	DBF4 zinc finger B	617.985	-1.7294	0.0019484	0.042446	5.1463	1.7506	1	yes
ENSG00000186767	SPIN4	protein_coding	spindlin family member 4	1198.29	-1.7255	0.00060352	0.014936	5.4735	1.7036	1	no
ENSG00000117461	PIK3R3	protein_coding	phosphoinositide-3-kinase regulatory subunit 3	2929.89	-1.7249	2.3423e-06	8.7849e-05	10.2082	3.0587	1.4594	no
ENSG00000179041	RRS1	protein_coding	ribosome biogenesis regulator 1 homolog	1924.59	-1.7241	0.00053068	0.013344	25.1367	6.6846	1.7004	no
ENSG00000215012	C22orf29	protein_coding	retrotransposon Gag like 10	3412.23	-1.7214	0.0015995	0.035568	11.0987	3.3426	1.585	no
ENSG00000144583	44259	protein_coding	membrane associated ring-CH-type finger 4	2941.75	-1.7207	1.6512e-05	0.00054442	11.0046	3.1292	1.585	yes
ENSG00000160013	PTGIR	protein_coding	prostaglandin I2 receptor	361.946	-1.7165	0.0013492	0.030523	4.2857	1.1534	1.3219	no
ENSG00000162063	CCNF	protein_coding	cyclin F	1302.47	-1.7156	0.00035409	0.0092289	6.59	1.8452	1.415	yes
ENSG00000139278	GLIPR1	protein_coding	GLI pathogenesis related 1	24219.7	-1.7147	5.9967e-05	0.0017976	112.68	31.8178	1.7885	yes
ENSG00000166562	SEC11C	protein_coding	SEC11 homolog C, signal peptidase complex subunit	1265.31	-1.7133	0.0011076	0.02546	36.3312	10.9046	1.6245	no
ENSG00000173530	TNFRSF10D	protein_coding	TNF receptor superfamily member 10d	5077.48	-1.7128	2.6942e-05	0.00086731	27.5473	7.9333	1.6881	yes
ENSG00000151388	ADAMTS12	protein_coding	ADAM metallopeptidase with thrombospondin type 1 motif 12	12164.2	-1.7114	2.6195e-06	9.72e-05	31.72	9.8909	1.585	yes
ENSG00000187951	ARHGAP11B	protein_coding	OTU deubiquitinase 7A pseudogene	1091.29	-1.709	0.0046905	0.0906	8.5483	2.6625	1.3219	yes
ENSG00000198668	CALM1	protein_coding	calmodulin 1	31295.5	-1.7082	0.0010524	0.024389	414.966	121.076	1.7697	yes
ENSG00000091651	ORC6	protein_coding	origin recognition complex subunit 6	1016.78	-1.6981	0.00010064	0.0028949	13.5411	4.0568	1.585	yes
ENSG00000100003	SEC14L2	protein_coding	SEC14 like lipid binding 2	3895.37	-1.6967	5.0058e-06	0.00017897	50.959	14.4681	1.7935	yes
ENSG00000188191	PRKAR1B	protein_coding	protein kinase cAMP-dependent type I regulatory subunit beta	742.91	-1.6927	0.00052002	0.013097	9.7899	2.8352	1.4594	no
ENSG00000173846	PLK3	protein_coding	polo like kinase 3	2008.34	-1.6877	0.00024697	0.0066813	23.7677	7.8766	1.4739	no
ENSG00000150054	MPP7	protein_coding	membrane palmitoylated protein 7	723.153	-1.6857	0.00058942	0.014644	2.5419	0.7934	1	no
ENSG00000115539	PDCL3	protein_coding	phosducin like 3	1396.82	-1.6817	0.00035708	0.0092837	34.2771	9.6915	1.6699	yes
ENSG00000125319	C17orf53	protein_coding	homologous recombination factor with OB-fold	298.205	-1.676	0.0038992	0.0774	3.0384	0.9269	1	no
ENSG00000184988	TMEM106A	protein_coding	transmembrane protein 106A	1401.38	-1.6707	0.00061447	0.015178	12.4206	4.0688	1.3785	no
ENSG00000198768	APCDD1L	protein_coding	APC down-regulated 1 like	1920.28	-1.6633	0.0016352	0.036208	14.8534	4.155	1.6781	yes
ENSG00000280641	CDH4	protein_coding	cadherin 4	1758.24	-1.6556	0.0023932	0.0506	6.5596	1.7648	1.415	yes
ENSG00000117308	GALE	protein_coding	UDP-galactose-4-epimerase	1776.97	-1.6519	0.00239	0.0506	33.9068	9.4786	1.8074	no
ENSG00000111252	SH2B3	protein_coding	SH2B adaptor protein 3	6888.93	-1.6438	7.7284e-06	0.00026865	24.488	7.7531	1.4739	no
ENSG00000155011	DKK2	protein_coding	dickkopf WNT signaling pathway inhibitor 2	684.479	-1.6427	0.0042616	0.0835	4.4527	1.4133	1.3219	yes
ENSG00000172115	CYCS	protein_coding	cytochrome c, somatic	8909.17	-1.642	0.00037113	0.0096092	91.8621	26.9581	1.7318	yes
ENSG00000167670	CHAF1A	protein_coding	chromatin assembly factor 1 subunit A	1495.91	-1.6406	0.0023555	0.04997	10.8101	3.1174	1.585	yes
ENSG00000185697	MYBL1	protein_coding	MYB proto-oncogene like 1	2591.1	-1.6391	4.3672e-05	0.0013412	13.6503	3.4248	1.9069	yes
ENSG00000066697	MSANTD3	protein_coding	Myb/SANT DNA binding domain containing 3	2169.67	-1.6367	0.00046685	0.011862	29.7739	8.5726	1.6323	no
ENSG00000160789	LMNA	protein_coding	lamin A/C	69249.9	-1.6362	0.0047364	0.0912	688.887	195.463	1.8157	no
ENSG00000152127	MGAT5	protein_coding	alpha-1,6-mannosylglycoprotein 6-beta-N-acetylglucosaminyltransferase	8736.4	-1.6362	5.3086e-06	0.00018915	22.6013	6.9553	1.585	yes
ENSG00000154175	ABI3BP	protein_coding	ABI family member 3 binding protein	23715.2	-1.6359	1.8895e-06	7.1987e-05	186.477	51.6089	1.819	yes
ENSG00000175866	BAIAP2	protein_coding	BAR/IMD domain containing adaptor protein 2	732.45	-1.6336	0.0024027	0.0508	13.5016	4.008	1.585	no
ENSG00000176692	FOXC2	protein_coding	forkhead box C2	1765.01	-1.6332	0.00040767	0.010486	11.4306	3.7705	1.263	yes
ENSG00000100106	TRIOBP	protein_coding	TRIO and F-actin binding protein	10398.6	-1.6325	0.0024064	0.0508	86.0163	25.1898	1.7425	no
ENSG00000273038	RP11-479G22.8	lincRNA	NA	474.362	-1.6255	0.0018675	0.040863	4.3992	1.3623	1.3219	no
ENSG00000100522	GNPNAT1	protein_coding	glucosamine-phosphate N-acetyltransferase 1	12511.8	-1.6218	0.00075254	0.018179	77.8879	24.4458	1.6599	yes
ENSG00000146376	ARHGAP18	protein_coding	Rho GTPase activating protein 18	7797.78	-1.6215	0.0001622	0.0045167	36.6709	11.6857	1.5475	yes
ENSG00000135540	NHSL1	protein_coding	NHS like 1	4004.13	-1.6214	0.0001189	0.0033737	21.5436	6.7107	1.5236	no
ENSG00000106034	CPED1	protein_coding	cadherin like and PC-esterase domain containing 1	980.456	-1.6211	0.0020353	0.043843	5.4638	1.82	1	yes
ENSG00000161800	RACGAP1	protein_coding	Rac GTPase activating protein 1	3328.25	-1.6203	4.1411e-05	0.0012818	28.7787	8.3875	1.737	yes
ENSG00000172893	DHCR7	protein_coding	7-dehydrocholesterol reductase	2173.99	-1.6161	0.0024636	0.0519	17.2861	4.8108	1.585	no
ENSG00000112081	SRSF3	protein_coding	serine and arginine rich splicing factor 3	16930.5	-1.6087	0.00029104	0.0077074	234.766	74.4013	1.6538	no
ENSG00000168398	BDKRB2	protein_coding	bradykinin receptor B2	931.755	-1.6083	0.0019755	0.042727	4.0322	1.3133	1.3219	no
ENSG00000146918	NCAPG2	protein_coding	non-SMC condensin II complex subunit G2	3203.4	-1.5909	3.5741e-05	0.0011195	16.2742	5.124	1.5025	yes
ENSG00000080493	SLC4A4	protein_coding	solute carrier family 4 member 4	1176.03	-1.5815	0.0002797	0.0074672	2.9489	0.9281	1	yes
ENSG00000112029	FBXO5	protein_coding	F-box protein 5	951.895	-1.5781	0.0027235	0.0564	8.7114	2.5839	1.3219	yes
ENSG00000181751	C5orf30	protein_coding	macrophage immunometabolism regulator	7268.6	-1.5614	0.00057965	0.014459	47.986	15.1023	1.6147	no
ENSG00000142949	PTPRF	protein_coding	protein tyrosine phosphatase receptor type F	9779.99	-1.559	0.0037633	0.075	31.3268	10.9053	1.415	yes
ENSG00000137767	SQRDL	protein_coding	sulfide quinone oxidoreductase	9729.42	-1.5564	0.0050054	0.0956	121.52	39.5098	1.585	no
ENSG00000144810	COL8A1	protein_coding	collagen type VIII alpha 1 chain	131512	-1.5535	0.0021001	0.044978	799.544	272.882	1.5476	no
ENSG00000131504	DIAPH1	protein_coding	diaphanous related formin 1	10458.3	-1.5507	4.6896e-05	0.0014331	37.4931	11.9666	1.5475	no
ENSG00000263528	IKBKE	protein_coding	inhibitor of nuclear factor kappa B kinase subunit epsilon	940.084	-1.5496	0.0049694	0.095	7.1393	2.3414	1.415	no
ENSG00000025772	TOMM34	protein_coding	translocase of outer mitochondrial membrane 34	2619.62	-1.5487	0.0052406	0.0993	28.4383	8.594	1.5361	no
ENSG00000196497	IPO4	protein_coding	importin 4	2737.29	-1.5463	0.0036363	0.0728	16.3835	5.7316	1.2801	no
ENSG00000044574	HSPA5	protein_coding	heat shock protein family A (Hsp70) member 5	68955.8	-1.5267	0.0013242	0.03	327.95	105.219	1.634	yes
ENSG00000175166	PSMD2	protein_coding	proteasome 26S subunit, non-ATPase 2	25637.8	-1.5236	0.0021484	0.045888	216.111	67.2472	1.6741	no
ENSG00000104611	SH2D4A	protein_coding	SH2 domain containing 4A	1851.83	-1.523	0.0011212	0.025735	17.0186	5.7944	1.3626	no
ENSG00000186575	NF2	protein_coding	neurofibromin 2	8728.18	-1.5223	0.00086942	0.02059	37.0619	12.8905	1.4406	yes
ENSG00000125741	OPA3	protein_coding	outer mitochondrial membrane lipid metabolism regulator OPA3	2327.48	-1.5206	0.0015162	0.033958	7.8024	2.5183	1.1699	no
ENSG00000138182	KIF20B	protein_coding	kinesin family member 20B	2264.53	-1.5199	0.0050141	0.0957	6.2143	2.2904	1.2224	yes
ENSG00000188917	TRMT2B	protein_coding	tRNA methyltransferase 2 homolog B	1189.3	-1.4978	0.0048331	0.0927	8.2456	2.9271	1.1699	no
ENSG00000113810	SMC4	protein_coding	structural maintenance of chromosomes 4	7847.34	-1.4949	0.00086347	0.020477	47.3319	13.5805	1.6781	no
ENSG00000120802	TMPO	protein_coding	thymopoietin	4962.3	-1.4943	0.0025984	0.0544	30.6136	10.8262	1.415	yes
ENSG00000188766	SPRED3	protein_coding	sprouty related EVH1 domain containing 3	1868.62	-1.492	0.0035496	0.0714	14.1149	4.9012	1.3219	no
ENSG00000112902	SEMA5A	protein_coding	semaphorin 5A	10170.5	-1.4889	0.00016845	0.0046825	17.5071	5.3686	1.663	no
ENSG00000089159	PXN	protein_coding	paxillin	14149.3	-1.4774	0.0045417	0.0881	77.7629	27.7516	1.4458	yes
ENSG00000136824	SMC2	protein_coding	structural maintenance of chromosomes 2	3637.37	-1.4766	0.0016006	0.035569	12.8108	4.199	1.4854	yes
ENSG00000135069	PSAT1	protein_coding	phosphoserine aminotransferase 1	2458.61	-1.4758	0.0040497	0.08	21.6363	7.3903	1.5236	no
ENSG00000183023	SLC8A1	protein_coding	solute carrier family 8 member A1	4850.39	-1.4718	0.00089979	0.021261	12.3136	4.3522	1.3785	yes
ENSG00000170558	CDH2	protein_coding	cadherin 2	11669.3	-1.4717	0.00042499	0.010887	52.8975	18.1172	1.507	yes
ENSG00000099365	STX1B	protein_coding	syntaxin 1B	1068.29	-1.4597	0.0044769	0.087	9.1325	3.0305	1.3219	no
ENSG00000170624	SGCD	protein_coding	sarcoglycan delta	14646.6	-1.4503	0.0021648	0.046206	50.4945	16.9471	1.5025	yes
ENSG00000258311	RP11-644F5.10	protein_coding	NA	2264.71	-1.4411	0.0035353	0.0713	11.9073	4.3262	1.3785	no
ENSG00000128641	MYO1B	protein_coding	myosin IB	32981	-1.4376	0.00062264	0.015348	145.01	48.142	1.5751	yes
ENSG00000139514	SLC7A1	protein_coding	solute carrier family 7 member 1	9823.59	-1.4005	0.0032429	0.0662	24.1875	8.9679	1.3219	no
ENSG00000057019	DCBLD2	protein_coding	discoidin, CUB and LCCL domain containing 2	23158.4	-1.3982	0.0047437	0.0913	79.0635	28.2684	1.4639	yes

## Sheet: Patient 6 | Day 28 vs Day 3 | u
ENSEMBL ID	Gene name	Biotype	Description	Base mean	log2 FC	P value	Adjusted P value	Reference expression (TPM)	Sample expression (TPM)	Discrete abs(log2 FC)	Significance in at least two out of three patients?
ENSG00000155307	SAMSN1	protein_coding	SAM domain, SH3 domain and nuclear localization signals 1	4309.67	15.8271	7.2289e-34	1.1862e-31	0	46.029	5.5546	yes
ENSG00000104435	STMN2	protein_coding	stathmin 2	41335.9	14.6975	5.6397e-189	3.3501e-185	0.021967	377.375	8.5622	yes
ENSG00000106565	TMEM176B	protein_coding	transmembrane protein 176B	1246.87	14.0377	1.9592e-27	2.2042e-25	0	24.8444	4.7004	no
ENSG00000243440	AF165138.7	protein_coding	NA	1134.52	13.9015	9.5669e-27	1.0447e-24	0	28.651	4.9069	yes
ENSG00000106538	RARRES2	protein_coding	retinoic acid receptor responder 2	3679.25	13.0872	2.2195e-44	5.4482e-42	0	183.995	7.5314	yes
ENSG00000245848	CEBPA	protein_coding	CCAAT enhancer binding protein alpha	1061.49	11.9577	1.624e-25	1.6575e-23	0	7.755	3.1699	no
ENSG00000167850	CD300C	protein_coding	CD300c molecule	259.032	11.7705	1.0018e-18	6.9683e-17	0	3.5733	2.3219	no
ENSG00000223662	SAMSN1-AS1	antisense	SAMSN1 antisense RNA 1	237.518	11.6454	4.527e-18	3.0147e-16	0	8.018	3.1699	no
ENSG00000259675	RP11-507B12.1	lincRNA	NA	163.126	11.1026	6.073e-16	3.3341e-14	0	19.4979	4.3219	yes
ENSG00000227925	RP11-191N8.2	lincRNA	NA	120.212	10.6627	9.7432e-15	4.8554e-13	0	12.3374	3.7004	yes
ENSG00000160808	MYL3	protein_coding	myosin light chain 3	110.627	10.5431	2.3502e-14	1.1369e-12	0	4.7788	2.585	yes
ENSG00000263655	RP11-25L3.3	lincRNA	NA	94.5254	10.3164	1.5297e-13	6.9896e-12	0	7.7176	3.1699	no
ENSG00000112936	C7	protein_coding	complement C7	6666.17	10.011	4.1093e-12	1.7386e-10	0.0607	28.4803	4.858	yes
ENSG00000137745	MMP13	protein_coding	matrix metallopeptidase 13	11101.6	9.8964	3.3109e-25	3.2999e-23	0.1947	98.0316	6.6294	yes
ENSG00000115602	IL1RL1	protein_coding	interleukin 1 receptor like 1	11272.6	9.5855	3.1155e-146	6.6096e-143	0.1373	83.3472	6.3923	yes
ENSG00000117594	HSD11B1	protein_coding	hydroxysteroid 11-beta dehydrogenase 1	2223.11	9.5432	7.179e-22	6.0233e-20	0.0519	35.0653	5.1699	yes
ENSG00000110245	APOC3	protein_coding	apolipoprotein C3	45.8388	9.2718	4.4689e-10	1.5524e-08	0	3.755	2.3219	no
ENSG00000112796	ENPP5	protein_coding	ectonucleotide pyrophosphatase/phosphodiesterase family member 5	11391.6	9.1494	9.3754e-189	4.641e-185	0.1675	76.5764	6.2854	yes
ENSG00000231863	RP3-428L16.1	antisense	NA	38.6397	9.0252	3.4569e-09	1.0991e-07	0	2.2123	1.585	no
ENSG00000267647	MAP1LC3P	processed_pseudogene	NA	66.3114	8.8386	8.649e-09	2.6213e-07	0	12.7807	3.8074	yes
ENSG00000269919	RP1-134E15.3	sense_intronic	NA	63.546	8.7916	2.4079e-09	7.7989e-08	0	4.6954	2.585	no
ENSG00000198879	SFMBT2	protein_coding	Scm like with four mbt domains 2	1704.9	8.6972	9.0776e-112	1.1722e-108	0.020412	6.8977	3	no
ENSG00000257017	HP	protein_coding	haptoglobin	8069.68	8.6812	3.7961e-110	4.5099e-107	0.4632	88.3368	6.4757	yes
ENSG00000189221	MAOA	protein_coding	monoamine oxidase A	14643.8	8.671	2.8164e-34	4.78e-32	0.1864	82.9189	6.3923	yes
ENSG00000123689	G0S2	protein_coding	G0/G1 switch 2	1199.59	8.6402	5.437e-82	3.5886e-79	0.1229	34.5295	5.1699	yes
ENSG00000039537	C6	protein_coding	complement C6	413.06	8.6079	3.3539e-09	1.0677e-07	0.0079764	3.4895	2	yes
ENSG00000118971	CCND2	protein_coding	cyclin D2	3045.52	8.5774	2.944e-160	7.9492e-157	0.037891	8.6682	3.3219	yes
ENSG00000172201	ID4	protein_coding	inhibitor of DNA binding 4, HLH protein	5106.99	8.4775	1.4622e-28	1.802e-26	0.1186	28.2103	4.858	no
ENSG00000109819	PPARGC1A	protein_coding	PPARG coactivator 1 alpha	2378.76	8.4602	3.711e-22	3.1948e-20	0.040723	10.6915	3.585	yes
ENSG00000130203	APOE	protein_coding	apolipoprotein E	13259.9	8.4187	8.8023e-119	1.376e-115	0.9572	321.424	7.3309	yes
ENSG00000124249	KCNK15	protein_coding	potassium two pore domain channel subfamily K member 15	666.607	8.3911	1.1451e-56	4.5349e-54	0.012724	5.0577	2.585	yes
ENSG00000198963	RORB	protein_coding	RAR related orphan receptor B	2829.59	8.2604	4.3558e-86	3.3172e-83	0.0575	7.3309	3	yes
ENSG00000101938	CHRDL1	protein_coding	chordin like 1	148631	8.1753	8.5089e-206	8.4241e-202	5.8534	980.61	7.1322	yes
ENSG00000160801	PTH1R	protein_coding	parathyroid hormone 1 receptor	307.274	8.1427	1.8159e-32	2.7801e-30	0.014658	2.92	2	yes
ENSG00000119508	NR4A3	protein_coding	nuclear receptor subfamily 4 group A member 3	5431.65	8.0501	1.5923e-101	1.5765e-98	0.1196	22.968	4.585	no
ENSG00000170345	FOS	protein_coding	Fos proto-oncogene, AP-1 transcription factor subunit	20314.2	8.0423	1.0782e-101	1.1042e-98	1.2704	239.521	6.9129	yes
ENSG00000129757	CDKN1C	protein_coding	cyclin dependent kinase inhibitor 1C	2550.29	7.9666	2.4608e-25	2.4692e-23	0.1679	35.5359	5.2095	no
ENSG00000137673	MMP7	protein_coding	matrix metallopeptidase 7	7687.14	7.9626	7.1956e-206	8.4241e-202	1.0113	169.506	6.4179	yes
ENSG00000129988	LBP	protein_coding	lipopolysaccharide binding protein	496.857	7.9456	1.1939e-46	3.166e-44	0.0508	5.2483	2.585	yes
ENSG00000187479	C11orf96	protein_coding	chromosome 11 open reading frame 96	9764.74	7.9093	1.6453e-14	8.064e-13	1.3054	154.507	6.2854	no
ENSG00000149131	SERPING1	protein_coding	serpin family G member 1	29012.3	7.8272	2.5691e-209	7.6305e-205	2.5236	348.404	6.4471	yes
ENSG00000153162	BMP6	protein_coding	bone morphogenetic protein 6	44725.9	7.813	6.5361e-177	2.4266e-173	1.6476	239.077	6.3219	no
ENSG00000274266	SNORA73A	snoRNA	small nucleolar RNA, H/ACA box 73A	16.5035	7.8007	1.9507e-05	0.00037966	0	6.0539	2.8074	no
ENSG00000125845	BMP2	protein_coding	bone morphogenetic protein 2	552.991	7.7482	1.5521e-10	5.6633e-09	0.015982	3.0204	2	no
ENSG00000118432	CNR1	protein_coding	cannabinoid receptor 1	944.751	7.6919	1.2481e-06	2.9212e-05	0.03199	2.9455	2	yes
ENSG00000185149	NPY2R	protein_coding	neuropeptide Y receptor Y2	1692.63	7.5861	2.253e-66	1.1342e-63	0.0671	9.036	3.3219	yes
ENSG00000181511	RP4-655L22.4	processed_pseudogene	NA	25.4262	7.4708	6.5767e-06	0.00013838	0	4.6782	2.585	no
ENSG00000169071	ROR2	protein_coding	receptor tyrosine kinase like orphan receptor 2	4430.25	7.4708	5.8342e-91	4.6833e-88	0.1467	24.4104	4.6439	yes
ENSG00000138449	SLC40A1	protein_coding	solute carrier family 40 member 1	1437.72	7.3767	1.3348e-70	7.0796e-68	0.1128	14.3437	3.9069	yes
ENSG00000162706	CADM3	protein_coding	cell adhesion molecule 3	220493	7.3629	3.5815e-193	2.6594e-189	10.7728	1098.97	6.5183	yes
ENSG00000131386	GALNT15	protein_coding	polypeptide N-acetylgalactosaminyltransferase 15	72253.3	7.3543	4.4632e-184	1.8937e-180	3.2116	304.342	6.2527	yes
ENSG00000232679	RP11-400N13.3	lincRNA	NA	1481.82	7.3436	2.1781e-115	3.0805e-112	0.829	87.2741	5.4594	yes
ENSG00000108551	RASD1	protein_coding	ras related dexamethasone induced 1	4558.85	7.3347	2.2254e-16	1.2638e-14	0.7186	51.7258	4.7279	yes
ENSG00000057657	PRDM1	protein_coding	PR/SET domain 1	7732.57	7.3082	1.3074e-135	2.5888e-132	0.616	58.314	4.8826	no
ENSG00000017427	IGF1	protein_coding	insulin like growth factor 1	183.075	7.2694	1.4724e-16	8.4918e-15	0.0788	4.6859	2.585	no
ENSG00000229694	LINC00484	lincRNA	long intergenic non-protein coding RNA 484	39.6645	7.2462	3.2042e-07	7.9704e-06	0	3.7339	2.3219	no
ENSG00000122176	FMOD	protein_coding	fibromodulin	822.595	7.1991	6.8224e-07	1.6434e-05	0.0719	5.1448	2.585	yes
ENSG00000207488	Y_RNA	misc_RNA	NA	10.8155	7.1882	0.00045824	0.0065655	0	2.375	1.585	no
ENSG00000135917	SLC19A3	protein_coding	solute carrier family 19 member 3	1256.47	7.1499	5e-67	2.6053e-64	0.2672	29.3068	4.9069	no
ENSG00000134121	CHL1	protein_coding	cell adhesion molecule L1 like	635.248	7.1271	3.7656e-06	8.2784e-05	0.024696	4.2845	2.3219	no
ENSG00000003989	SLC7A2	protein_coding	solute carrier family 7 member 2	5315.17	7.0039	4.7979e-97	4.3182e-94	0.1669	13.8461	3.9069	yes
ENSG00000262243	CES1	protein_coding	carboxylesterase 1	137.732	7.001	1.2587e-16	7.3306e-15	0.030795	2.8221	2	no
ENSG00000139832	RAB20	protein_coding	RAB20, member RAS oncogene family	2670.24	6.9873	2.5376e-111	3.1404e-108	0.4777	40.188	5.3576	no
ENSG00000165507	C10orf10	protein_coding	DEPP1 autophagy regulator	55002.9	6.9765	5.8834e-112	7.9428e-109	7.126	500.5	5.9687	yes
ENSG00000104213	PDGFRL	protein_coding	platelet derived growth factor receptor like	242.528	6.9757	1.1957e-06	2.8075e-05	0.01758	2.8319	2	yes
ENSG00000271404	MZT1P2	processed_pseudogene	NA	9.1409	6.9454	0.00079365	0.010778	0	2.7269	2	no
ENSG00000187808	SOWAHD	protein_coding	sosondowah ankyrin repeat domain family member D	261.863	6.9275	7.7775e-32	1.1577e-29	0.0588	3.5818	2.3219	no
ENSG00000123358	NR4A1	protein_coding	nuclear receptor subfamily 4 group A member 1	12478.4	6.915	1.0123e-62	4.6258e-60	1.6366	151.958	5.6724	no
ENSG00000133048	CHI3L1	protein_coding	chitinase 3 like 1	7851.14	6.9122	2.4813e-158	6.1414e-155	1.2024	92.7667	5.5546	yes
ENSG00000135821	GLUL	protein_coding	glutamate-ammonia ligase	663399	6.8897	1.9922e-163	5.9171e-160	83.8507	6028.63	6.1486	yes
ENSG00000087494	PTHLH	protein_coding	parathyroid hormone like hormone	1016.59	6.8798	0.00047643	0.0067933	0.1562	15.7864	4.0875	no
ENSG00000200033	RNU6-403P	snRNA	RNA, U6 small nuclear 403, pseudogene	202.065	6.8597	8.0527e-26	8.3336e-24	0.879	62.7758	5	yes
ENSG00000275567	RP11-729I10.3	sense_intronic	NA	8.4898	6.8408	0.0013091	0.016803	0	3.3555	2	no
ENSG00000223336	RNU2-6P	snRNA	RNA, U2 small nuclear 6, pseudogene	8.1446	6.7782	0.0016723	0.020931	0	2.2174	1.585	no
ENSG00000235450	RP11-142A5.1	lincRNA	NA	8.064	6.763	0.0017962	0.022313	0	2.7927	2	no
ENSG00000120875	DUSP4	protein_coding	dual specificity phosphatase 4	14083.6	6.7596	6.8332e-80	4.4121e-77	0.7144	51.3538	4.7004	yes
ENSG00000121552	CSTA	protein_coding	cystatin A	1152.6	6.7567	2.4244e-45	6.2616e-43	0.3765	38.7286	5.3219	yes
ENSG00000169031	COL4A3	protein_coding	collagen type IV alpha 3 chain	2324.14	6.7482	5.5036e-16	3.044e-14	0.234	13.6997	3.9069	yes
ENSG00000226263	ISM1-AS1	antisense	NA	112.411	6.7358	0.00031446	0.004717	0	4.8226	2.585	no
ENSG00000115919	KYNU	protein_coding	kynureninase	9662.88	6.6947	1.3843e-127	2.2841e-124	0.6839	41.4906	4.3923	yes
ENSG00000186417	GLDN	protein_coding	gliomedin	621.138	6.669	2.3114e-64	1.1073e-61	0.0574	3.8483	2.3219	no
ENSG00000230749	MEIS1-AS2	antisense	MEIS1 antisense RNA 2	434.963	6.6155	2.234e-10	8.0058e-09	0.3489	18.7568	4.3219	no
ENSG00000175899	A2M	protein_coding	alpha-2-macroglobulin	1765.02	6.5709	0.00020159	0.0031529	0.035326	9.0667	3.3219	yes
ENSG00000249242	TMEM150C	protein_coding	transmembrane protein 150C	4860.81	6.5497	2.4891e-09	8.0534e-08	0.3704	47.6464	5.6147	yes
ENSG00000197766	CFD	protein_coding	complement factor D	3163.54	6.4753	3.8863e-83	2.6234e-80	1.1802	57.6402	4.8826	yes
ENSG00000274619	CFD	protein_coding	complement factor D	3163.54	6.4753	3.8863e-83	2.6234e-80	1.1802	57.6402	4.8826	yes
ENSG00000179869	ABCA13	protein_coding	ATP binding cassette subfamily A member 13	5204.15	6.462	1.1095e-57	4.4533e-55	0.1778	10.9702	3.585	yes
ENSG00000234459	AC002064.4	antisense	NA	542.516	6.4598	5.94e-38	1.1607e-35	1.6443	107.383	5.1699	yes
ENSG00000206862	Y_RNA	misc_RNA	NA	6.4609	6.4447	0.0066433	0.0673	0	2.3684	1.585	no
ENSG00000115604	IL18R1	protein_coding	interleukin 18 receptor 1	159.781	6.4205	1.9064e-17	1.1996e-15	0.0664	2.3221	1.585	yes
ENSG00000256001	RP11-575F12.2	lincRNA	uncharacterized LOC107984450	595.256	6.4005	1.5961e-56	6.2376e-54	1.6208	79.6933	4.7549	yes
ENSG00000154153	FAM134B	protein_coding	reticulophagy regulator 1	1654.23	6.3861	2.5732e-11	1.0163e-09	0.2067	15.3533	4	yes
ENSG00000116690	PRG4	protein_coding	proteoglycan 4	2285.5	6.3092	4.0367e-117	5.9947e-114	0.1867	8.4514	3.1699	yes
ENSG00000115252	PDE1A	protein_coding	phosphodiesterase 1A	4237.56	6.295	6.2491e-134	1.16e-130	0.5957	28.3089	3.858	yes
ENSG00000237422	RP11-305L7.3	lincRNA	NA	138.093	6.2776	1.1273e-14	5.5897e-13	0.2223	10.6212	3.585	no
ENSG00000238042	RP11-815M8.1	lincRNA	long intergenic non-protein coding RNA 2257	383.661	6.2654	4.2172e-47	1.1491e-44	0.4065	17.752	4.2479	yes
ENSG00000064205	WISP2	protein_coding	cellular communication network factor 5	4257.74	6.2581	4.7094e-129	8.2278e-126	1.0257	49.3226	4.6439	yes
ENSG00000156804	FBXO32	protein_coding	F-box protein 32	46169.2	6.1812	2.4059e-105	2.6465e-102	15.6956	751.817	5.469	yes
ENSG00000226416	MRPL23-AS1	antisense	MRPL23 antisense RNA 1	343.255	6.181	6.6566e-32	9.9852e-30	0.0546	3.7544	2.3219	no
ENSG00000103196	CRISPLD2	protein_coding	cysteine rich secretory protein LCCL domain containing 2	66944.8	6.1788	3.9592e-169	1.3066e-165	6.7108	314.767	5.3038	yes
ENSG00000029559	IBSP	protein_coding	integrin binding sialoprotein	527.835	6.1745	1.8208e-49	5.2503e-47	0.1878	6.8194	3	yes
ENSG00000281931	SCG5	protein_coding	secretogranin V	692.247	6.164	1.2323e-51	3.9357e-49	0.5118	21.0952	3.4594	no
ENSG00000278266	RP11-575F12.3	lincRNA	NA	1978.13	6.1299	2.2386e-75	1.3569e-72	0.2623	12.5857	3.8074	yes
ENSG00000105696	TMEM59L	protein_coding	transmembrane protein 59 like	3285.85	6.1202	3.5788e-56	1.3628e-53	1.1287	40.9315	4.3923	yes
ENSG00000213088	ACKR1	protein_coding	atypical chemokine receptor 1 (Duffy blood group)	7305.74	6.1034	4.2311e-78	2.6738e-75	1.9127	65.8819	4.4811	yes
ENSG00000081052	COL4A4	protein_coding	collagen type IV alpha 4 chain	7482.35	6.1014	1.4926e-148	3.41e-145	0.302	12.6422	3.8074	yes
ENSG00000164379	FOXQ1	protein_coding	forkhead box Q1	1607.24	6.0598	9.3461e-51	2.922e-48	0.2446	12.1738	3.7004	no
ENSG00000267165	RP11-78A19.3	antisense	NA	1250.06	6.0566	0.0023101	0.027545	1.3102	68.124	5.1085	no
ENSG00000254403	OR10Y1P	unprocessed_pseudogene	olfactory receptor family 10 subfamily Y member 1 pseudogene	114.923	6.0494	2.6113e-15	1.3372e-13	0.0645	2.3308	1.585	no
ENSG00000211445	GPX3	protein_coding	glutathione peroxidase 3	7403.3	6.0471	2.9473e-87	2.3036e-84	2.7454	128.345	5.0112	yes
ENSG00000230537	RP11-305L7.1	lincRNA	NA	136.604	6.0441	1.0164e-16	5.9658e-15	0.0784	4.6737	2.585	yes
ENSG00000066468	FGFR2	protein_coding	fibroblast growth factor receptor 2	455.098	6.0124	2.3312e-28	2.8377e-26	0.0688	3.0042	2	no
ENSG00000163993	S100P	protein_coding	S100 calcium binding protein P	35.0922	6.0104	1.7239e-05	0.0003393	0	4.4025	2.3219	no
ENSG00000128045	RASL11B	protein_coding	RAS like family 11 member B	337.408	6.0041	7.246e-05	0.0012593	0.1025	3.3699	2	yes
ENSG00000236094	LINC00545	lincRNA	long intergenic non-protein coding RNA 545	152.514	5.9966	3.7651e-19	2.7011e-17	0.4356	16.8234	4.1699	no
ENSG00000166819	PLIN1	protein_coding	perilipin 1	454.078	5.996	1.2858e-30	1.7763e-28	0.0546	2.7288	2	no
ENSG00000171951	SCG2	protein_coding	secretogranin II	8380.32	5.9727	8.2985e-85	6.0116e-82	1.548	72.2973	4.6049	yes
ENSG00000174502	SLC26A9	protein_coding	solute carrier family 26 member 9	529.544	5.9692	9.9554e-31	1.3882e-28	0.049728	2.3952	1.585	no
ENSG00000109321	AREG	protein_coding	amphiregulin	47740.6	5.969	6.8406e-98	6.3491e-95	22.1485	865.285	5.2347	no
ENSG00000104332	SFRP1	protein_coding	secreted frizzled related protein 1	804.486	5.9532	3.5099e-53	1.1982e-50	0.0828	3.1405	2	yes
ENSG00000225956	RP5-1077I2.3	antisense	NA	75.1619	5.948	4.2172e-12	1.7792e-10	0.237	6.4119	2.8074	no
ENSG00000271216	LINC01050	lincRNA	NA	192.427	5.9027	1.486e-23	1.3707e-21	0.2147	7.7394	3.1699	no
ENSG00000138207	RBP4	protein_coding	retinol binding protein 4	1381.53	5.8235	2.7553e-45	7.0549e-43	0.9787	30.8411	4	no
ENSG00000260454	RP11-367F23.2	lincRNA	NA	216.778	5.811	1.9161e-24	1.8659e-22	0.0871	2.7361	2	no
ENSG00000158859	ADAMTS4	protein_coding	ADAM metallopeptidase with thrombospondin type 1 motif 4	30956.1	5.8084	9.3872e-46	2.4673e-43	3.0613	120.139	4.9189	no
ENSG00000116741	RGS2	protein_coding	regulator of G protein signaling 2	71003.8	5.8072	7.0779e-85	5.2555e-82	33.9598	1247.16	5.1561	no
ENSG00000189001	SBSN	protein_coding	suprabasin	456.729	5.7938	3.4705e-31	4.9797e-29	0.2118	5.8524	2.8074	no
ENSG00000207352	RNU6-540P	snRNA	RNA, U6 small nuclear 540, pseudogene	15.3179	5.7923	0.0010374	0.013604	0	4.0943	2.3219	no
ENSG00000173376	NDNF	protein_coding	neuron derived neurotrophic factor	3469.8	5.7311	2.8189e-54	9.9672e-52	0.7235	22.9788	3.585	yes
ENSG00000157514	TSC22D3	protein_coding	TSC22 domain family member 3	206056	5.723	6.3485e-55	2.2995e-52	74.5378	2406.82	4.9857	yes
ENSG00000102802	MEDAG	protein_coding	mesenteric estrogen dependent adipogenesis	40973.9	5.7209	4.7196e-56	1.7744e-53	10.2615	401.858	5.1952	no
ENSG00000167244	IGF2	protein_coding	insulin like growth factor 2	95008.9	5.719	1.035e-94	8.7832e-92	13.5756	452.033	4.9165	yes
ENSG00000227660	UST-AS1	antisense	NA	76.9419	5.7064	8.1755e-13	3.592e-11	0.1342	2.9478	2	no
ENSG00000182853	VMO1	protein_coding	vitelline membrane outer layer 1 homolog	591.331	5.6984	1.8603e-38	3.7844e-36	0.5913	23.603	3.6439	yes
ENSG00000170262	MRAP	protein_coding	melanocortin 2 receptor accessory protein	429.476	5.666	1.3971e-37	2.6944e-35	0.4326	10.3312	3.4594	no
ENSG00000001561	ENPP4	protein_coding	ectonucleotide pyrophosphatase/phosphodiesterase 4	11940.9	5.6543	1.2726e-105	1.4537e-102	1.4839	48.0712	4.6147	yes
ENSG00000228360	RP11-365F18.1	processed_pseudogene	NA	19.482	5.6514	0.00022156	0.0034326	0	4.9009	2.585	no
ENSG00000094963	FMO2	protein_coding	flavin containing dimethylaniline monoxygenase 2	2975.58	5.6399	1.9589e-95	1.7112e-92	0.5012	14.2146	2.9069	yes
ENSG00000224570	RP11-430H12.2	processed_pseudogene	NA	180.611	5.6293	0.0010733	0.014003	0.0646	2.0936	1.585	no
ENSG00000234431	AC007283.5	3prime_overlapping_ncRNA	NA	93.0649	5.6293	0.00078119	0.010629	0.0678	9.7138	3.4594	no
ENSG00000273707	CDKN1C	protein_coding	cyclin dependent kinase inhibitor 1C	198.67	5.5892	0.00018512	0.0029184	0.1239	4.5623	2.585	yes
ENSG00000146374	RSPO3	protein_coding	R-spondin 3	890.75	5.5888	3.1898e-33	5.1489e-31	0.1155	3.777	2.3219	no
ENSG00000179593	ALOX15B	protein_coding	arachidonate 15-lipoxygenase type B	3094.31	5.5757	1.8013e-73	1.0095e-70	0.7107	19.3451	3.3219	yes
ENSG00000225670	CADM3-AS1	antisense	NA	2059.59	5.5517	3.9614e-37	7.4467e-35	0.3613	8.9843	3.3219	yes
ENSG00000126368	NR1D1	protein_coding	nuclear receptor subfamily 1 group D member 1	6870.76	5.5423	1.2517e-84	8.8516e-82	1.5975	46.8865	4	yes
ENSG00000204103	MAFB	protein_coding	MAF bZIP transcription factor B	660.213	5.5199	1.3382e-53	4.6216e-51	0.1369	3.474	2	yes
ENSG00000144476	ACKR3	protein_coding	atypical chemokine receptor 3	603.845	5.5145	5.2284e-38	1.0284e-35	0.1888	6.6902	3	no
ENSG00000236577	SNRPGP14	processed_pseudogene	small nuclear ribonucleoprotein polypeptide G pseudogene 14	12.2212	5.4997	0.0031857	0.03628	0	3.6755	2.3219	no
ENSG00000234604	RP1-206D15.5	processed_pseudogene	NA	357.908	5.4861	3.6445e-34	6.0812e-32	4.7926	122.437	4.3576	no
ENSG00000164112	TMEM155	protein_coding	small integral membrane protein 43	1865.2	5.4814	1.5789e-42	3.6636e-40	1.7754	47.7589	4.0297	yes
ENSG00000196616	ADH1B	protein_coding	alcohol dehydrogenase 1B (class I), beta polypeptide	47769.7	5.4772	3.0867e-75	1.8335e-72	13.4226	357.861	4.6805	yes
ENSG00000069188	SDK2	protein_coding	sidekick cell adhesion molecule 2	112.886	5.4752	7.9929e-10	2.7038e-08	0.0557	3.089	2	no
ENSG00000238840	U8	snoRNA	NA	13.1867	5.4576	0.0033001	0.037361	0	4.3358	2.3219	yes
ENSG00000267638	RP11-546M21.6	antisense	uncharacterized LOC105371789	29.2806	5.454	9.1033e-06	0.0001866	0.145	5.1973	2.585	no
ENSG00000241886	RP11-242C19.2	sense_intronic	NA	219.305	5.4419	3.2065e-19	2.3228e-17	0.611	14.1189	2.9069	no
ENSG00000136928	GABBR2	protein_coding	gamma-aminobutyric acid type B receptor subunit 2	1030.51	5.4389	1.7645e-05	0.00034684	0.1666	7.5275	3.1699	no
ENSG00000004799	PDK4	protein_coding	pyruvate dehydrogenase kinase 4	15579.4	5.4378	2.6949e-49	7.6964e-47	2.9235	95.7521	4.5999	yes
ENSG00000163520	FBLN2	protein_coding	fibulin 2	7276.77	5.4295	3.2882e-64	1.5502e-61	1.2829	30.9839	4	no
ENSG00000111913	FAM65B	protein_coding	RHO family interacting cell polarization regulator 2	410.672	5.4286	3.0142e-31	4.3458e-29	0.1448	3.4982	2	yes
ENSG00000041353	RAB27B	protein_coding	RAB27B, member RAS oncogene family	18092.1	5.4257	3.1871e-65	1.5776e-62	1.713	58.1901	4.2977	yes
ENSG00000120833	SOCS2	protein_coding	suppressor of cytokine signaling 2	4939.56	5.4195	7.7021e-67	3.9441e-64	1.7736	52.0607	4.143	no
ENSG00000166922	SCG5	protein_coding	secretogranin V	489.482	5.4191	4.132e-38	8.2365e-36	0.5231	14.3833	2.9069	no
ENSG00000124749	COL21A1	protein_coding	collagen type XXI alpha 1 chain	2842.6	5.408	2.4409e-48	6.7755e-46	0.5532	15.7537	3.0875	yes
ENSG00000107317	PTGDS	protein_coding	prostaglandin D2 synthase	4547.64	5.407	4.173e-92	3.4429e-89	6.2596	163.327	4.5502	yes
ENSG00000151692	RNF144A	protein_coding	ring finger protein 144A	6441.14	5.393	2.9455e-74	1.7154e-71	0.7145	22.0621	3.5236	yes
ENSG00000143196	DPT	protein_coding	dermatopontin	4035.98	5.376	4.2384e-52	1.3987e-49	1.5382	48.4823	4.0297	yes
ENSG00000175426	PCSK1	protein_coding	proprotein convertase subtilisin/kexin type 1	2432.06	5.3715	1.0785e-47	2.9661e-45	0.4048	12.3102	3.7004	yes
ENSG00000196136	SERPINA3	protein_coding	serpin family A member 3	570.682	5.3354	3.4212e-36	6.196e-34	0.2989	7.2914	3	yes
ENSG00000135929	CYP27A1	protein_coding	cytochrome P450 family 27 subfamily A member 1	4438.42	5.3296	1.9206e-59	8.0345e-57	1.7962	43.4457	3.8745	yes
ENSG00000231606	RP11-344F13.1	lincRNA	NA	10.329	5.3245	0.0097589	0.0925	0	2.7415	2	no
ENSG00000253549	CA3-AS1	antisense	NA	136.122	5.3072	2.7689e-17	1.735e-15	0.5628	9.3122	2.3219	no
ENSG00000231233	CFAP58-AS1	antisense	NA	280.197	5.3032	6.1374e-27	6.7513e-25	0.3752	7.7485	3.1699	no
ENSG00000124882	EREG	protein_coding	epiregulin	10001.6	5.2828	4.5874e-39	9.528e-37	1.685	47.7544	4.0297	yes
ENSG00000117479	SLC19A2	protein_coding	solute carrier family 19 member 2	11824.7	5.2678	8.9536e-42	2.0456e-39	2.6262	75.2034	4.2479	no
ENSG00000002933	TMEM176A	protein_coding	transmembrane protein 176A	942.686	5.2657	2.0116e-38	4.0644e-36	0.9191	21.3609	3.4594	no
ENSG00000200003	RNU6-986P	snRNA	RNA, U6 small nuclear 986, pseudogene	17.6405	5.2635	0.00059711	0.0083331	0.2929	5.5473	2.8074	no
ENSG00000187260	WDR86	protein_coding	WD repeat domain 86	331.996	5.2373	7.5755e-33	1.2032e-30	0.2032	4.8031	2.585	no
ENSG00000149599	DUSP15	protein_coding	dual specificity phosphatase 15	202.545	5.2343	9.7673e-17	5.7445e-15	0.1167	3.5445	2.3219	no
ENSG00000169242	EFNA1	protein_coding	ephrin A1	615.178	5.2056	8.7457e-28	1.0227e-25	0.3991	10.8912	3.585	no
ENSG00000151892	GFRA1	protein_coding	GDNF family receptor alpha 1	2148.71	5.1737	6.4734e-40	1.4034e-37	0.2512	7.3209	3	no
ENSG00000122121	XPNPEP2	protein_coding	X-prolyl aminopeptidase 2	347.112	5.163	0.0039839	0.043861	0.1123	2.592	2	no
ENSG00000133800	LYVE1	protein_coding	lymphatic vessel endothelial hyaluronan receptor 1	441.122	5.1571	2.6061e-30	3.5344e-28	0.1686	3.5252	2.3219	no
ENSG00000273259	SERPINA3	protein_coding	NA	1306.44	5.1534	1.2237e-27	1.4032e-25	0.6151	16.206	3.0875	yes
ENSG00000269906	RP11-248J18.2	sense_intronic	NA	1224.49	5.1459	4.6096e-35	8.0535e-33	2.5137	63.8755	4.0224	no
ENSG00000169508	GPR183	protein_coding	G protein-coupled receptor 183	552.702	5.1402	3.8452e-19	2.752e-17	0.2336	8.2256	3.1699	no
ENSG00000246985	SOCS2-AS1	processed_transcript	SOCS2 antisense RNA 1	1156.87	5.1212	2.3316e-62	1.0493e-59	0.6384	13.164	2.8074	no
ENSG00000006016	CRLF1	protein_coding	cytokine receptor like factor 1	10485	5.1195	8.507e-78	5.2639e-75	8.8832	183.411	4.2016	yes
ENSG00000101230	ISM1	protein_coding	isthmin 1	1976	5.1159	1.9016e-50	5.8225e-48	0.5808	10.6687	2.585	yes
ENSG00000229331	GK-IT1	sense_intronic	NA	43.5074	5.0992	4.6278e-06	0.00010015	0.1899	5.7444	2.8074	no
ENSG00000270842	RP11-57B24.2	processed_pseudogene	NA	17.4609	5.0919	0.0020635	0.025108	0	2.9324	2	no
ENSG00000228804	RP11-211G3.3	antisense	hCG1645011-like	100.95	5.0812	1.5649e-10	5.7028e-09	0.225	6.1425	2.8074	no
ENSG00000283467	AL078584.1	protein_coding	NA	838.469	5.0644	1.7345e-25	1.7643e-23	0.1517	4.1536	2.3219	no
ENSG00000104043	ATP8B4	protein_coding	ATPase phospholipid transporting 8B4 (putative)	1032.29	5.0623	5.0212e-49	1.4203e-46	0.2623	6.6921	3	yes
ENSG00000062282	DGAT2	protein_coding	diacylglycerol O-acyltransferase 2	1285.39	5.0489	1.6888e-30	2.3115e-28	0.5023	8.9575	2.3219	no
ENSG00000235641	LINC00484	lincRNA	NA	118.952	5.0343	1.6503e-09	5.4463e-08	0.1585	2.9654	2	no
ENSG00000255112	CHMP1B	protein_coding	charged multivesicular body protein 1B	58388.4	5.0269	3.8252e-62	1.6957e-59	17.8714	379.745	4.3257	no
ENSG00000104267	CA2	protein_coding	carbonic anhydrase 2	13766.8	5.0198	1.714e-32	2.6514e-30	8.9825	159.086	4	yes
ENSG00000162849	KIF26B	protein_coding	kinesin family member 26B	2978.93	4.9851	1.1637e-40	2.5988e-38	0.2254	3.4503	2	yes
ENSG00000116678	LEPR	protein_coding	leptin receptor	61072.3	4.9775	1.134e-103	1.2029e-100	12.0587	219.415	4.0809	yes
ENSG00000224945	RP11-82L18.2	sense_intronic	NA	757.929	4.9664	1.5766e-32	2.4517e-30	2.4674	48.3736	4.0297	no
ENSG00000170873	MTSS1	protein_coding	MTSS I-BAR domain containing 1	9418.21	4.9546	5.7287e-58	2.3308e-55	4.5678	104.659	4.143	yes
ENSG00000140285	FGF7	protein_coding	fibroblast growth factor 7	70014.9	4.9214	6.1869e-61	2.6631e-58	36.308	705.496	4.2541	yes
ENSG00000260859	RP11-254F19.2	sense_intronic	NA	19.426	4.9036	0.00098003	0.012957	0	4.84	2.585	no
ENSG00000258545	RHOXF1-AS1	antisense	RHOXF1 antisense RNA 1	4462.4	4.8874	2.1252e-71	1.1476e-68	4.3968	76.5541	3.9635	yes
ENSG00000130066	SAT1	protein_coding	spermidine/spermine N1-acetyltransferase 1	61296.4	4.8845	1.1108e-64	5.4083e-62	73.0877	1441.4	4.2844	yes
ENSG00000215483	LINC00598	lincRNA	long intergenic non-protein coding RNA 548	955.742	4.8606	2.499e-19	1.8282e-17	1.0988	20.6602	3.4594	no
ENSG00000153234	NR4A2	protein_coding	nuclear receptor subfamily 4 group A member 2	2493.67	4.8531	2.6481e-09	8.5397e-08	0.8134	15.2392	3	no
ENSG00000275611	RP11-291I6.2	sense_intronic	NA	219.548	4.85	1.0606e-17	6.7742e-16	0.2116	3.3214	2	no
ENSG00000272841	RP3-428L16.2	antisense	NA	2392.14	4.8476	1.1735e-40	2.601e-38	1.3447	25.8906	3.7549	no
ENSG00000249464	LINC01091	lincRNA	long intergenic non-protein coding RNA 1091	706.025	4.796	9.1346e-06	0.00018699	0.6219	10.1953	2.4594	no
ENSG00000137869	CYP19A1	protein_coding	cytochrome P450 family 19 subfamily A member 1	1975.72	4.7934	3.4144e-50	1.0348e-47	1.403	24.1235	3.6439	yes
ENSG00000226757	PP12613	antisense	uncharacterized LOC100192379	358.059	4.7756	1.9352e-26	2.0901e-24	0.1826	2.6989	2	no
ENSG00000228060	RP11-69E11.8	antisense	NA	365.355	4.7629	4.5231e-15	2.2731e-13	1.1741	20.4188	3.3923	no
ENSG00000164920	OSR2	protein_coding	odd-skipped related transciption factor 2	1295.3	4.7613	3.1664e-38	6.3544e-36	1.4146	26.9061	3.8074	no
ENSG00000142178	SIK1	protein_coding	salt inducible kinase 1	4996	4.7283	3.018e-30	4.0377e-28	1.2279	24.0519	3.6439	no
ENSG00000131979	GCH1	protein_coding	GTP cyclohydrolase 1	1979.16	4.7116	4.9086e-43	1.1571e-40	0.7824	13.1716	2.8074	yes
ENSG00000104953	TLE6	protein_coding	TLE family member 6, subcortical maternal complex member	359.312	4.711	1.0941e-15	5.8547e-14	0.4818	12.3305	3.7004	no
ENSG00000198732	SMOC1	protein_coding	SPARC related modular calcium binding 1	3639.26	4.7073	3.9488e-62	1.7248e-59	1.9648	33.7826	3.5443	yes
ENSG00000064886	CHI3L2	protein_coding	chitinase 3 like 2	1403.21	4.694	4.3586e-37	8.1419e-35	1.5401	27.88	3.273	yes
ENSG00000107968	MAP3K8	protein_coding	mitogen-activated protein kinase kinase kinase 8	941.541	4.6679	2.018e-21	1.6649e-19	0.9005	15.4795	3	no
ENSG00000105792	CFAP69	protein_coding	cilia and flagella associated protein 69	7629.62	4.6647	1.6217e-48	4.5439e-46	3.6716	65.366	3.7225	no
ENSG00000091129	NRCAM	protein_coding	neuronal cell adhesion molecule	17616.2	4.6542	3.5994e-58	1.4848e-55	4.3689	76.7436	3.9635	yes
ENSG00000182752	PAPPA	protein_coding	pappalysin 1	42682.5	4.6492	1.5476e-73	8.8396e-71	4.6057	68.4201	3.5236	yes
ENSG00000136859	ANGPTL2	protein_coding	angiopoietin like 2	6761.54	4.6489	6.5351e-55	2.3385e-52	6.4283	98.9806	3.8365	yes
ENSG00000164949	GEM	protein_coding	GTP binding protein overexpressed in skeletal muscle	4213.59	4.6435	1.0227e-08	3.0776e-07	2.7638	43.5053	3.4919	yes
ENSG00000198814	GK	protein_coding	glycerol kinase	6803.48	4.6397	5.7246e-27	6.3207e-25	4.7481	79.8082	3.7549	no
ENSG00000247925	RP3-510L9.1	antisense	NA	132.394	4.6216	7.5766e-10	2.5659e-08	0.206	5.2538	2.585	no
ENSG00000078114	NEBL	protein_coding	nebulette	781.676	4.6148	7.7955e-32	1.1577e-29	0.3748	5.9871	2.8074	yes
ENSG00000271992	RP11-42O15.3	lincRNA	NA	35.2225	4.6147	3.5949e-05	0.00066484	0.1597	2.3286	1.585	no
ENSG00000271447	MMP28	protein_coding	matrix metallopeptidase 28	179.637	4.6101	1.8996e-13	8.6008e-12	0.2341	2.2849	1.585	yes
ENSG00000198624	CCDC69	protein_coding	coiled-coil domain containing 69	4282.44	4.6055	1.1286e-53	3.9434e-51	2.1054	39.6495	3.7726	yes
ENSG00000173918	C1QTNF1	protein_coding	C1q and TNF related 1	7119.22	4.5976	2.6088e-72	1.4349e-69	4.4729	72.1235	3.8679	yes
ENSG00000250116	RP11-417F21.1	antisense	RHOQ antisense RNA 1	640.993	4.5813	3.0536e-18	2.0519e-16	0.603	8.9091	2.3219	no
ENSG00000145934	TENM2	protein_coding	teneurin transmembrane protein 2	1232.14	4.5639	1.1433e-27	1.3213e-25	0.2504	3.3455	2	yes
ENSG00000259367	RP11-815J21.4	antisense	NA	566.558	4.5609	0.00026624	0.0040427	1.0568	23.8097	3.6439	yes
ENSG00000161249	DMKN	protein_coding	dermokine	127.375	4.5438	2.2313e-11	8.8836e-10	0.2166	2.4926	1.585	no
ENSG00000259884	RP11-1100L3.8	lincRNA	NA	70.3286	4.5407	6.5764e-07	1.589e-05	0.1606	4.041	2.3219	no
ENSG00000174697	LEP	protein_coding	leptin	589.177	4.5214	3.9958e-18	2.673e-16	0.2212	2.2999	1.585	yes
ENSG00000077420	APBB1IP	protein_coding	amyloid beta precursor protein binding family B member 1 interacting protein	1970.86	4.5048	1.9555e-55	7.1705e-53	1.0246	14.7463	3	yes
ENSG00000228604	RP5-872K7.7	antisense	NA	53.495	4.4841	7.7366e-05	0.0013344	0.2678	4.498	2.3219	no
ENSG00000228412	RP4-625H18.2	antisense	lncRNA bladder and prostate cancer suppressor, hnRNPK interacting	95.7549	4.4786	2.0237e-05	0.00039259	0.3167	2.9589	2	no
ENSG00000165061	ZMAT4	protein_coding	zinc finger matrin-type 4	144.14	4.4695	8.3353e-14	3.8682e-12	0.4836	5.4898	2.585	no
ENSG00000143507	DUSP10	protein_coding	dual specificity phosphatase 10	16255.9	4.447	8.6597e-44	2.0742e-41	9.8651	153.977	3.8167	yes
ENSG00000259416	RP11-158M2.5	antisense	NA	152.678	4.4419	1.3773e-11	5.5505e-10	0.4121	4.3502	2.3219	no
ENSG00000275993	CH507-42P11.8	protein_coding	salt inducible kinase 1B (putative)	5159.58	4.4343	3.672e-26	3.9231e-24	1.7072	26.4479	3.1699	no
ENSG00000121361	KCNJ8	protein_coding	potassium inwardly rectifying channel subfamily J member 8	3521.1	4.4338	1.824e-23	1.6721e-21	2.1401	30.7398	3.415	no
ENSG00000182575	NXPH3	protein_coding	neurexophilin 3	1209.99	4.3926	1.6983e-44	4.2035e-42	0.5157	7.1194	2	no
ENSG00000197872	FAM49A	protein_coding	CYFIP related Rac1 interactor A	273.739	4.3906	2.9821e-14	1.4378e-12	0.1816	2.9256	2	no
ENSG00000130844	ZNF331	protein_coding	zinc finger protein 331	9208.18	4.3799	6.5563e-21	5.263e-19	5.8503	98.9683	3.8365	no
ENSG00000167889	MGAT5B	protein_coding	alpha-1,6-mannosylglycoprotein 6-beta-N-acetylglucosaminyltransferase B	568.183	4.3771	5.9301e-23	5.3212e-21	0.4111	5.7576	2.8074	no
ENSG00000105509	HAS1	protein_coding	hyaluronan synthase 1	31619.7	4.3559	3.3535e-34	5.6272e-32	25.9468	289.814	3.43	no
ENSG00000113645	WWC1	protein_coding	WW and C2 domain containing 1	1997.17	4.3482	5.9293e-52	1.9352e-49	1.0758	13.1341	2.8074	no
ENSG00000150907	FOXO1	protein_coding	forkhead box O1	14009	4.339	1.0523e-43	2.5004e-41	3.6369	42.9321	3.1375	yes
ENSG00000183644	C11orf88	protein_coding	HOATZ cilia and flagella associated protein	253.56	4.3228	3.4351e-22	2.9745e-20	0.2123	2.8442	2	no
ENSG00000223414	LINC00473	lincRNA	NA	405.766	4.3198	9.0178e-26	9.2999e-24	0.4764	4.6898	2.585	no
ENSG00000243055	GK-AS1	antisense	NA	256.434	4.3163	4.7347e-13	2.1083e-11	0.7242	12.1033	2.7004	no
ENSG00000179163	FUCA1	protein_coding	alpha-L-fucosidase 1	2981.57	4.2928	8.5057e-51	2.6875e-48	2.2532	28.029	3.273	no
ENSG00000196611	MMP1	protein_coding	matrix metallopeptidase 1	701.717	4.287	0.00050924	0.0072195	0.4328	6.701	3	no
ENSG00000162772	ATF3	protein_coding	activating transcription factor 3	765.031	4.2868	1.5849e-14	7.7935e-13	0.6083	10.0514	2.4594	no
ENSG00000164142	FAM160A1	protein_coding	family with sequence similarity 160 member A1	1510.48	4.2706	1.0642e-34	1.8376e-32	0.2682	3.2496	2	yes
ENSG00000278843	MMP28	protein_coding	matrix metallopeptidase 28	197.065	4.2656	8.5467e-19	6.0011e-17	0.2658	3.2468	2	yes
ENSG00000107738	C10orf54	protein_coding	V-set immunoregulatory receptor	18158.4	4.2359	1.9156e-36	3.5121e-34	14.5807	147.823	3.2192	no
ENSG00000186407	CD300E	protein_coding	CD300e molecule	458.662	4.2137	2.3389e-24	2.2702e-22	0.1824	2.6333	2	no
ENSG00000108932	SLC16A6	protein_coding	solute carrier family 16 member 6	1272.03	4.2051	3.7278e-23	3.3653e-21	0.5113	6.1663	1.8074	no
ENSG00000170525	PFKFB3	protein_coding	6-phosphofructo-2-kinase/fructose-2,6-biphosphatase 3	14063.3	4.1983	9.2631e-19	6.4887e-17	6.0813	92.6442	3.7472	no
ENSG00000259616	RP11-507B12.2	lincRNA	NA	508.113	4.1912	1.5615e-33	2.5482e-31	0.469	4.6472	2.585	no
ENSG00000013588	GPRC5A	protein_coding	G protein-coupled receptor class C group 5 member A	1369.24	4.162	4.9628e-18	3.2829e-16	0.5121	6.5681	2	no
ENSG00000139112	GABARAPL1	protein_coding	GABA type A receptor associated protein like 1	11148.2	4.1462	2.6349e-30	3.5573e-28	11.1665	137.821	3.534	yes
ENSG00000151748	SAV1	protein_coding	salvador family WW domain containing protein 1	12393.2	4.136	2.7124e-37	5.1642e-35	10.847	131.924	3.4703	no
ENSG00000115590	IL1R2	protein_coding	interleukin 1 receptor type 2	199.584	4.1318	0.0022499	0.027032	0.4253	4.9788	2.585	yes
ENSG00000244124	ATP1B3-AS1	antisense	NA	484.392	4.129	1.5222e-14	7.5103e-13	5.3901	72.3854	3.6049	no
ENSG00000143995	MEIS1	protein_coding	Meis homeobox 1	11244	4.1274	3.2716e-19	2.3642e-17	7.3251	92.9156	3.5546	no
ENSG00000163884	KLF15	protein_coding	Kruppel like factor 15	4350.51	4.1248	1.7391e-45	4.5309e-43	2.9313	35.2563	3.1699	no
ENSG00000134830	C5AR2	protein_coding	complement component 5a receptor 2	2014.3	4.1174	1.0946e-22	9.6759e-21	0.6036	6.7345	2	no
ENSG00000026652	AGPAT4	protein_coding	1-acylglycerol-3-phosphate O-acyltransferase 4	7338.9	4.106	1.3808e-35	2.4412e-33	4.158	46.9793	3.263	no
ENSG00000084674	APOB	protein_coding	apolipoprotein B	2820.02	4.0987	9.1986e-50	2.705e-47	0.3203	3.5928	2.3219	yes
ENSG00000126860	EVI2A	protein_coding	ecotropic viral integration site 2A	3174.35	4.0967	1.0716e-42	2.506e-40	2.9087	33.4442	3.0875	yes
ENSG00000067113	PLPP1	protein_coding	phospholipid phosphatase 1	14203	4.0956	3.0028e-36	5.4715e-34	18.6138	191.974	3.2705	yes
ENSG00000092068	SLC7A8	protein_coding	solute carrier family 7 member 8	9368.62	4.0925	7.6981e-44	1.8589e-41	5.4129	63.3079	3.415	no
ENSG00000175155	YPEL2	protein_coding	yippee like 2	9252.63	4.0722	5.7907e-35	1.0058e-32	3.2926	34.5152	3.1699	yes
ENSG00000251301	RP11-81H14.2	lincRNA	long intergenic non-protein coding RNA 2384	232.545	4.0561	4.0721e-16	2.282e-14	1.2888	14.6303	3	yes
ENSG00000065717	TLE2	protein_coding	TLE family member 2, transcriptional corepressor	4675.79	4.0461	1.2686e-52	4.2818e-50	4.5472	48.8793	3.0589	no
ENSG00000250934	RP11-71E19.1	lincRNA	NA	84.7643	4.0313	1.1823e-05	0.00023888	0.8208	6.9793	2	yes
ENSG00000224743	TEX26-AS1	antisense	TEX26 antisense RNA 1	701.678	4.0301	7.92e-16	4.3061e-14	1.3591	16.6958	3.1699	no
ENSG00000137101	CD72	protein_coding	CD72 molecule	213.416	4.0005	5.3495e-10	1.8411e-08	0.4068	3.8635	2.3219	no
ENSG00000099998	GGT5	protein_coding	gamma-glutamyltransferase 5	56801.9	3.989	1.1497e-36	2.1342e-34	63.2785	628.498	3.2969	yes
ENSG00000117643	MAN1C1	protein_coding	mannosidase alpha class 1C member 1	608.886	3.9606	2.7847e-20	2.1765e-18	0.4258	3.6219	2.3219	yes
ENSG00000170412	GPRC5C	protein_coding	G protein-coupled receptor class C group 5 member C	481.044	3.9583	2.4749e-19	1.815e-17	0.5614	4.9131	1.585	no
ENSG00000145284	SCD5	protein_coding	stearoyl-CoA desaturase 5	9963.86	3.9472	2.4827e-41	5.6288e-39	6.4254	62.2471	3.1699	yes
ENSG00000264056	MIR5685	miRNA	microRNA 5685	22.7973	3.9388	0.0017211	0.021523	0.8953	8.4966	2.1699	no
ENSG00000230435	AC004160.4	antisense	NA	51.8944	3.9331	3.8342e-06	8.423e-05	0.3349	2.9564	2	no
ENSG00000122420	PTGFR	protein_coding	prostaglandin F receptor	15005.8	3.9052	9.0861e-52	2.9333e-49	5.7903	57.4528	3.0506	yes
ENSG00000273694	U2	snRNA	NA	124.227	3.8963	1.4145e-08	4.1679e-07	5.5696	41.27	2.585	no
ENSG00000276886	GREM1	protein_coding	gremlin 1, DAN family BMP antagonist	20064.3	3.8872	4.52e-26	4.7775e-24	9.5609	79.868	2.8804	no
ENSG00000168461	RAB31	protein_coding	RAB31, member RAS oncogene family	25529.3	3.8854	3.9616e-27	4.3905e-25	17.1022	164.392	3.1964	yes
ENSG00000165997	ARL5B	protein_coding	ADP ribosylation factor like GTPase 5B	19479	3.885	4.0361e-40	8.8144e-38	4.8247	45.6834	2.9696	no
ENSG00000095739	BAMBI	protein_coding	BMP and activin membrane bound inhibitor	2045.18	3.8848	3.2179e-14	1.544e-12	2.2748	24.597	3.1155	no
ENSG00000133401	PDZD2	protein_coding	PDZ domain containing 2	1540.25	3.8777	9.5525e-28	1.1083e-25	1.0203	9.5968	2.4594	no
ENSG00000181826	RELL1	protein_coding	RELT like 1	8334.82	3.8775	2.7862e-32	4.2438e-30	4.3356	45.8289	3.2327	no
ENSG00000185885	IFITM1	protein_coding	interferon induced transmembrane protein 1	3914.63	3.8717	3.9021e-30	5.1972e-28	22.7272	180	2.9149	yes
ENSG00000166482	MFAP4	protein_coding	microfibril associated protein 4	3632.77	3.8615	1.5877e-40	3.4931e-38	4.3986	39.7298	3.0356	yes
ENSG00000114796	KLHL24	protein_coding	kelch like family member 24	9389.3	3.8539	4.1589e-17	2.5312e-15	4.5587	49.1056	3.0589	no
ENSG00000165995	CACNB2	protein_coding	calcium voltage-gated channel auxiliary subunit beta 2	1030.82	3.8495	2.2037e-26	2.3715e-24	0.538	5.555	1.8074	yes
ENSG00000105516	DBP	protein_coding	D-box binding PAR bZIP transcription factor	816.176	3.8494	8.2196e-24	7.7013e-22	0.8227	7.0888	2	no
ENSG00000274216	Metazoa_SRP	misc_RNA	NA	22.0076	3.8458	0.0047197	0.0505	0.5398	4.2196	1.3219	no
ENSG00000114120	SLC25A36	protein_coding	solute carrier family 25 member 36	35274.5	3.8427	6.7821e-44	1.6511e-41	29.7362	255.728	3.0514	yes
ENSG00000225808	DNAJC19P5	processed_pseudogene	NA	90.8831	3.8416	3.0559e-06	6.7988e-05	2.0585	16.7737	2.585	no
ENSG00000161921	CXCL16	protein_coding	C-X-C motif chemokine ligand 16	844.325	3.8393	9.8112e-18	6.2938e-16	1.13	10.3951	2.4594	no
ENSG00000183723	CMTM4	protein_coding	CKLF like MARVEL transmembrane domain containing 4	22227.6	3.8346	1.5761e-49	4.5894e-47	8.2324	76.113	3.0969	no
ENSG00000142632	ARHGEF19	protein_coding	Rho guanine nucleotide exchange factor 19	7977.48	3.8264	1.0417e-30	1.4458e-28	9.7477	87.8226	3.0163	no
ENSG00000099282	TSPAN15	protein_coding	tetraspanin 15	323.851	3.8164	4.6528e-12	1.9519e-10	0.5195	3.9281	1.3219	yes
ENSG00000134339	SAA2	protein_coding	serum amyloid A2	388.704	3.8045	1.3028e-16	7.5725e-15	1.6808	15.8372	2.5025	yes
ENSG00000162496	DHRS3	protein_coding	dehydrogenase/reductase 3	1183.91	3.8033	1.5499e-24	1.5193e-22	1.3743	10.8724	2.585	yes
ENSG00000134548	SPX	protein_coding	spexin hormone	204.596	3.7996	1.0569e-10	3.9191e-09	0.1756	2.0451	1.585	yes
ENSG00000223953	C1QTNF5	protein_coding	C1q and TNF related 5	5129.4	3.7944	6.8384e-24	6.4274e-22	10.3211	78.9593	2.8625	yes
ENSG00000152154	TMEM178A	protein_coding	transmembrane protein 178A	1659.27	3.7825	9.801e-26	1.0073e-23	2.5768	26.8916	2.8074	yes
ENSG00000130775	THEMIS2	protein_coding	thymocyte selection associated family member 2	3766.47	3.7809	6.8625e-22	5.7905e-20	4.4347	41.92	3.1043	no
ENSG00000134107	BHLHE40	protein_coding	basic helix-loop-helix family member e40	6965.67	3.7718	4.9963e-41	1.1242e-38	4.0249	39.8839	3.0356	no
ENSG00000188290	HES4	protein_coding	hes family bHLH transcription factor 4	148.13	3.7704	5.9959e-07	1.4514e-05	0.364	2.7769	2	no
ENSG00000254453	NAV2-AS2	antisense	NAV2 antisense RNA 2	90.7723	3.7695	0.00015939	0.0025547	0.2339	3.3898	2	no
ENSG00000180447	GAS1	protein_coding	growth arrest specific 1	49919.2	3.7681	9.1623e-30	1.2041e-27	33.3282	263.269	2.9569	yes
ENSG00000175197	DDIT3	protein_coding	DNA damage inducible transcript 3	3899.82	3.7678	1.5218e-28	1.8678e-26	11.1389	108.013	3.1832	yes
ENSG00000270885	RASL10B	protein_coding	RAS like family 10 member B	2513.46	3.7673	1.1516e-21	9.6074e-20	1.5545	15.2601	2.415	yes
ENSG00000033327	GAB2	protein_coding	GRB2 associated binding protein 2	7156.55	3.7627	3.6811e-24	3.5383e-22	2.4897	22.3879	2.9386	no
ENSG00000069535	MAOB	protein_coding	monoamine oxidase B	340.069	3.7577	1.3923e-08	4.1066e-07	0.35	4.3448	2.3219	no
ENSG00000227715	HLA-A	protein_coding	major histocompatibility complex, class I, A	481.091	3.7562	1.63e-09	5.3851e-08	0.6449	5.7441	1.8074	no
ENSG00000028137	TNFRSF1B	protein_coding	TNF receptor superfamily member 1B	1400.24	3.754	7.7438e-33	1.2234e-30	0.9354	7.5044	2.1699	yes
ENSG00000261701	HPR	protein_coding	haptoglobin-related protein	121.899	3.7526	1.4733e-05	0.00029388	0.1023	2.5477	2	no
ENSG00000137193	PIM1	protein_coding	Pim-1 proto-oncogene, serine/threonine kinase	3322.14	3.7514	4.5119e-22	3.8397e-20	2.7082	23.4368	2.585	no
ENSG00000224690	UBE2D3P3	processed_pseudogene	ubiquitin conjugating enzyme E2 D3 pseudogene 3	98.3837	3.7471	7.4184e-06	0.00015433	0.8775	9.2667	2.3219	no
ENSG00000113916	BCL6	protein_coding	BCL6 transcription repressor	29797.7	3.7471	1.1105e-34	1.9065e-32	26.2523	235.452	3.1278	yes
ENSG00000132639	SNAP25	protein_coding	synaptosome associated protein 25	2895.45	3.7437	1.4135e-29	1.8333e-27	3.9085	31.1875	2.6781	no
ENSG00000255364	RP11-94A24.1	lincRNA	NA	2044.26	3.7422	1.578e-13	7.1884e-12	12.858	94.6425	2.7776	yes
ENSG00000144824	PHLDB2	protein_coding	pleckstrin homology like domain family B member 2	25660.6	3.733	2.8087e-28	3.3911e-26	19.3064	187.641	3.2403	no
ENSG00000176658	MYO1D	protein_coding	myosin ID	23666.8	3.7271	7.9196e-39	1.6335e-36	10.2828	90.6397	3.0641	yes
ENSG00000118985	ELL2	protein_coding	elongation factor for RNA polymerase II 2	107715	3.7271	1.1909e-29	1.5513e-27	70.2317	635.483	3.1631	no
ENSG00000166510	CCDC68	protein_coding	coiled-coil domain containing 68	15684.8	3.7263	8.755e-31	1.2324e-28	11.0523	103.212	3.1155	yes
ENSG00000255471	RP11-736K20.5	antisense	NA	1038.05	3.7193	4.3514e-21	3.5216e-19	4.2632	30.6843	2.6781	no
ENSG00000027697	IFNGR1	protein_coding	interferon gamma receptor 1	23997	3.7124	1.5311e-34	2.6136e-32	26.0282	199.729	2.8962	yes
ENSG00000134363	FST	protein_coding	follistatin	1665.11	3.7075	2.4168e-25	2.4332e-23	1.7627	15.5825	2.5025	yes
ENSG00000173281	PPP1R3B	protein_coding	protein phosphatase 1 regulatory subunit 3B	8942.29	3.7036	2.3184e-35	4.0745e-33	3.5687	29.8411	2.6323	no
ENSG00000205236	RP11-514P8.6	protein_coding	NA	488.675	3.7031	4.7537e-21	3.8367e-19	0.3369	2.4386	1.585	no
ENSG00000083223	ZCCHC6	protein_coding	terminal uridylyl transferase 7	26699.6	3.6944	9.7955e-06	0.00019982	18.1959	147.668	2.9712	no
ENSG00000172216	CEBPB	protein_coding	CCAAT enhancer binding protein beta	16944.9	3.6909	3.0816e-28	3.7056e-26	20.4388	152.199	2.8651	no
ENSG00000221866	PLXNA4	protein_coding	plexin A4	4442.95	3.684	3.5505e-36	6.3911e-34	0.8383	5.7721	1.8074	no
ENSG00000130513	GDF15	protein_coding	growth differentiation factor 15	2547.43	3.6804	2.1522e-18	1.4627e-16	6.5104	49.0766	2.6439	yes
ENSG00000196352	CD55	protein_coding	CD55 molecule (Cromer blood group)	7199.84	3.678	4.005e-25	3.9784e-23	9.8583	76.9891	2.826	yes
ENSG00000116667	C1orf21	protein_coding	chromosome 1 open reading frame 21	3962.15	3.6563	6.0181e-28	7.065e-26	4.8574	45.2514	2.9386	yes
ENSG00000147614	ATP6V0D2	protein_coding	ATPase H+ transporting V0 subunit d2	308.026	3.6501	1.227e-10	4.5271e-09	0.217	2.8488	2	no
ENSG00000139597	N4BP2L1	protein_coding	NEDD4 binding protein 2 like 1	1110.77	3.6441	4.7491e-20	3.6168e-18	1.8372	13.8246	2.3219	no
ENSG00000183691	NOG	protein_coding	noggin	2814.19	3.6407	2.8472e-16	1.6077e-14	3.5848	23.2533	2.263	yes
ENSG00000143162	CREG1	protein_coding	cellular repressor of E1A stimulated genes 1	6342.92	3.6394	1.0446e-35	1.8607e-33	7.6938	59.0377	2.737	yes
ENSG00000140009	ESR2	protein_coding	estrogen receptor 2	502.211	3.6375	1.3697e-17	8.7111e-16	0.3178	2.4618	1.585	no
ENSG00000259762	RP11-158M2.4	antisense	NA	66.8068	3.6371	0.0017772	0.022141	0.1938	4.3697	2.3219	no
ENSG00000111859	NEDD9	protein_coding	neural precursor cell expressed, developmentally down-regulated 9	36923.7	3.6329	9.4107e-45	2.3488e-42	18.847	157.095	2.9819	yes
ENSG00000165030	NFIL3	protein_coding	nuclear factor, interleukin 3 regulated	35639.9	3.6277	4.4972e-38	8.9047e-36	40.8299	315.613	2.916	no
ENSG00000171105	INSR	protein_coding	insulin receptor	3133.19	3.6175	5.8308e-34	9.6748e-32	1.1362	7.8802	2.1699	yes
ENSG00000259649	RP11-351M8.1	antisense	NA	844.995	3.6154	1.6994e-22	1.4977e-20	8.4284	59.128	2.737	no
ENSG00000197249	SERPINA1	protein_coding	serpin family A member 1	116.438	3.6092	4.3108e-05	0.00078984	0.1956	2.2624	1.585	no
ENSG00000265972	TXNIP	protein_coding	thioredoxin interacting protein	50341	3.5922	3.2501e-34	5.4848e-32	42.2107	305.199	2.8311	yes
ENSG00000223039	RN7SKP268	misc_RNA	NA	26.5854	3.5855	0.0038584	0.042697	0.6368	5.5912	1.8074	no
ENSG00000120594	PLXDC2	protein_coding	plexin domain containing 2	14632.2	3.5842	1.4424e-39	3.082e-37	6.258	47.4278	2.7776	yes
ENSG00000271986	RN7SL827P	misc_RNA	RNA, 7SL, cytoplasmic 827, pseudogene	31.6682	3.5694	0.0017489	0.021853	0.9049	4.5848	1.585	no
ENSG00000176170	SPHK1	protein_coding	sphingosine kinase 1	24399	3.5662	6.1464e-20	4.6452e-18	37.9225	261.393	2.748	no
ENSG00000257252	RP11-486A14.2	antisense	NA	95.1855	3.5551	1.1495e-07	3.0213e-06	0.7005	6.5145	2	no
ENSG00000161542	PRPSAP1	protein_coding	phosphoribosyl pyrophosphate synthetase associated protein 1	11120.2	3.555	3.4364e-17	2.1131e-15	28.2423	238.548	3.0489	no
ENSG00000161544	CYGB	protein_coding	cytoglobin	2818.6	3.5539	6.3909e-29	8.0091e-27	4.6826	31.493	2.415	yes
ENSG00000269927	RP6-91H8.3	lincRNA	NA	1010.73	3.5514	3.0413e-20	2.3708e-18	1.3935	7.5402	2.1699	no
ENSG00000108984	MAP2K6	protein_coding	mitogen-activated protein kinase kinase 6	485.445	3.5407	6.9611e-18	4.5241e-16	0.4856	3.8527	2.3219	yes
ENSG00000119915	ELOVL3	protein_coding	ELOVL fatty acid elongase 3	245.187	3.5373	2.5887e-11	1.0197e-09	0.4624	3.3233	2	no
ENSG00000259065	RP5-1021I20.1	antisense	NA	236.843	3.5356	8.9275e-12	3.6776e-10	1.3703	13.4047	2.8074	no
ENSG00000207704	MIR548AA1	miRNA	microRNA 548aa-1	43.7406	3.5283	0.0028833	0.033387	2.2459	15.9807	2.5025	no
ENSG00000283172	hsa-mir-548d-1	miRNA	microRNA 548d-1	43.7406	3.5283	0.0028833	0.033387	2.2459	15.9807	2.5025	no
ENSG00000225527	RP11-383B4.4	antisense	NA	40.1612	3.5248	0.00074547	0.010175	0.5542	3.1843	1	no
ENSG00000122035	RASL11A	protein_coding	RAS like family 11 member A	844.296	3.5224	5.5476e-22	4.6943e-20	1.6344	10.8942	2	yes
ENSG00000169122	FAM110B	protein_coding	family with sequence similarity 110 member B	1787.22	3.5131	9.1073e-18	5.8676e-16	2.8191	21.057	2.4594	no
ENSG00000116761	CTH	protein_coding	cystathionine gamma-lyase	2653.34	3.5124	2.5784e-15	1.3226e-13	4.292	34.4418	2.8074	no
ENSG00000240666	MME-AS1	antisense	NA	724.742	3.5086	9.5033e-17	5.6003e-15	3.1113	22.2453	2.5236	yes
ENSG00000150457	LATS2	protein_coding	large tumor suppressor kinase 2	32291.6	3.508	1.9255e-23	1.7542e-21	13.8862	115.556	2.9635	yes
ENSG00000203805	PLPP4	protein_coding	phospholipid phosphatase 4	3596.22	3.5057	1.0189e-28	1.261e-26	10.183	65.735	2.6067	no
ENSG00000054356	PTPRN	protein_coding	protein tyrosine phosphatase receptor type N	1107.24	3.5015	8.1614e-20	6.0905e-18	0.8568	5.8832	1.8074	no
ENSG00000135338	LCA5	protein_coding	lebercilin LCA5	3748.92	3.4962	3.7238e-33	5.9784e-31	1.9692	13.5531	2.3219	no
ENSG00000170891	CYTL1	protein_coding	cytokine like 1	2448.75	3.4888	1.2393e-16	7.2313e-15	7.7231	57.0902	2.6881	no
ENSG00000235086	FNDC1-IT1	sense_intronic	NA	91.4097	3.4866	8.694e-05	0.0014823	0.3584	5.8268	2.8074	no
ENSG00000230333	AC004538.3	processed_transcript	NA	327.354	3.4811	1.6299e-14	8.0015e-13	1.9396	16.3824	2.5025	yes
ENSG00000231106	LINC01436	lincRNA	NA	294.113	3.4794	2.7117e-06	6.0722e-05	1.0602	6.7705	2	no
ENSG00000109272	PF4V1	protein_coding	platelet factor 4 variant 1	294.031	3.4783	1.6702e-11	6.6854e-10	1.2274	8.906	2.3219	no
ENSG00000247130	RP11-366H4.3	antisense	NA	66.7182	3.4705	6.9721e-05	0.0012181	0.5846	3.717	1.3219	no
ENSG00000262655	SPON1	protein_coding	spondin 1	4037.28	3.4692	2.7905e-19	2.0314e-17	3.6149	19.9123	2.0704	yes
ENSG00000221869	CEBPD	protein_coding	CCAAT enhancer binding protein delta	30385.5	3.4524	5.3372e-20	4.0439e-18	41.4319	239.751	2.5206	no
ENSG00000162645	GBP2	protein_coding	guanylate binding protein 2	2510.43	3.437	1.2769e-15	6.7605e-14	2.0102	17.9743	2.663	yes
ENSG00000259615	RP11-429B14.3	antisense	NA	383.899	3.4349	4.808e-13	2.1345e-11	3.7972	29.3389	2.585	no
ENSG00000234206	RP1-67A8.3	antisense	NA	24.501	3.4319	0.0048611	0.0518	0.5892	3.5885	1.3219	no
ENSG00000088826	SMOX	protein_coding	spermine oxidase	6413.92	3.4296	7.2097e-23	6.4499e-21	8.0456	57.2465	2.6881	no
ENSG00000154319	FAM167A	protein_coding	family with sequence similarity 167 member A	7418.89	3.424	3.4633e-27	3.8526e-25	5.4128	35.3156	2.585	yes
ENSG00000071282	LMCD1	protein_coding	LIM and cysteine rich domains 1	39136.9	3.4166	2.3015e-26	2.4678e-24	110.881	671.239	2.585	no
ENSG00000119729	RHOQ	protein_coding	ras homolog family member Q	28081.6	3.4156	8.9984e-33	1.4141e-30	24.6965	169.024	2.709	yes
ENSG00000102760	RGCC	protein_coding	regulator of cell cycle	12252.9	3.4106	9.5565e-31	1.3389e-28	59.5299	379.193	2.6391	yes
ENSG00000189184	PCDH18	protein_coding	protocadherin 18	31276.5	3.4093	8.0702e-30	1.0653e-27	16.3308	112.039	2.7327	yes
ENSG00000219073	CELA3B	protein_coding	chymotrypsin like elastase 3B	48.7969	3.4033	0.0015463	0.019526	0.5129	3.0375	1	no
ENSG00000107372	ZFAND5	protein_coding	zinc finger AN1-type containing 5	41207.7	3.3985	0.00018696	0.0029449	52.1627	333.103	2.6558	no
ENSG00000166920	C15orf48	protein_coding	chromosome 15 open reading frame 48	55.1292	3.3978	8.374e-05	0.0014335	0.2722	2.332	1.585	no
ENSG00000131459	GFPT2	protein_coding	glutamine-fructose-6-phosphate transaminase 2	8110.78	3.3926	3.0463e-27	3.4014e-25	12.2983	78.7404	2.6215	no
ENSG00000149212	SESN3	protein_coding	sestrin 3	19954.4	3.371	1.7791e-32	2.7379e-30	5.0919	33.74	2.5443	yes
ENSG00000171388	APLN	protein_coding	apelin	1308.49	3.3664	1.6449e-27	1.8577e-25	1.0371	7.1972	2	no
ENSG00000135678	CPM	protein_coding	carboxypeptidase M	38349.6	3.3555	1.0444e-32	1.6327e-30	32.8169	242.336	2.8373	no
ENSG00000237276	ANO7L1	transcribed_unprocessed_pseudogene	NA	595.532	3.3459	7.7158e-18	4.9819e-16	13.7064	81.6633	2.4681	no
ENSG00000214575	CPEB1	protein_coding	cytoplasmic polyadenylation element binding protein 1	698.845	3.3434	9.1193e-11	3.4112e-09	0.7309	4.5332	1.585	no
ENSG00000120129	DUSP1	protein_coding	dual specificity phosphatase 1	71427.9	3.3418	5.9451e-19	4.2142e-17	102.796	666.326	2.6811	no
ENSG00000164463	CREBRF	protein_coding	CREB3 regulatory factor	4825.38	3.3377	2.8624e-16	1.6132e-14	2.0473	13.864	2.3219	yes
ENSG00000148841	ITPRIP	protein_coding	inositol 1,4,5-trisphosphate receptor interacting protein	30016	3.3349	2.9756e-17	1.8451e-15	16.5287	109.913	2.6245	no
ENSG00000249835	VCAN-AS1	antisense	VCAN antisense RNA 1	379.47	3.3335	1.4102e-11	5.6755e-10	6.2465	33.4339	2.2801	no
ENSG00000151151	IPMK	protein_coding	inositol polyphosphate multikinase	4173.41	3.3297	5.3364e-18	3.5143e-16	1.8064	12.204	2.1155	no
ENSG00000087074	PPP1R15A	protein_coding	protein phosphatase 1 regulatory subunit 15A	9533.11	3.3208	2.6376e-13	1.1887e-11	12.6454	75.1591	2.4406	no
ENSG00000272402	RP1-30M3.6	antisense	NA	86.9227	3.3189	0.00013017	0.0021254	1.4316	7.0387	2	no
ENSG00000277595	RP11-946P6.6	sense_intronic	NA	74.7743	3.3163	5.9629e-05	0.0010586	0.7715	4.1361	1.3219	no
ENSG00000126803	HSPA2	protein_coding	heat shock protein family A (Hsp70) member 2	3619.84	3.3139	1.096e-15	5.8547e-14	3.5054	19.576	2.0704	no
ENSG00000112096	SOD2	protein_coding	superoxide dismutase 2	44891.9	3.3052	1.2959e-15	6.8364e-14	48.718	293.139	2.5558	yes
ENSG00000132823	OSER1	protein_coding	oxidative stress responsive serine rich 1	9830.85	3.3049	7.806e-17	4.6649e-15	14.8269	99.8792	2.6582	no
ENSG00000104047	DTWD1	protein_coding	DTW domain containing 1	10657	3.3049	3.0259e-29	3.8738e-27	29.9065	180.247	2.5456	no
ENSG00000253958	CLDN23	protein_coding	claudin 23	401.578	3.3046	1.063e-08	3.1793e-07	0.6271	3.2362	1	no
ENSG00000253154	CTA-392E5.1	lincRNA	NA	76.8627	3.3018	4.2518e-06	9.2854e-05	0.7522	4.0957	1.3219	no
ENSG00000174804	FZD4	protein_coding	frizzled class receptor 4	16673.4	3.3004	5.3075e-33	8.4752e-31	5.7971	35.1351	2.3626	yes
ENSG00000108840	HDAC5	protein_coding	histone deacetylase 5	13838.1	3.2973	1.0226e-23	9.5509e-22	13.8128	89.6369	2.6009	no
ENSG00000019549	SNAI2	protein_coding	snail family transcriptional repressor 2	37223.3	3.2928	3.8082e-17	2.3321e-15	50.8345	344.809	2.7342	no
ENSG00000170458	CD14	protein_coding	CD14 molecule	373.62	3.29	8.1991e-10	2.7704e-08	1.1305	7.0824	2	yes
ENSG00000133107	TRPC4	protein_coding	transient receptor potential cation channel subfamily C member 4	1166.32	3.274	2.8715e-12	1.2271e-10	0.9831	6.9847	2	no
ENSG00000112312	GMNN	protein_coding	geminin DNA replication inhibitor	6107.17	3.2687	8.002e-13	3.5262e-11	20.3754	143.065	2.7776	no
ENSG00000147894	C9orf72	protein_coding	C9orf72-SMCR8 complex subunit	1840.01	3.2687	3.7492e-13	1.6821e-11	1.4176	10.3772	2.4594	no
ENSG00000124212	PTGIS	protein_coding	prostaglandin I2 synthase	852.963	3.2664	4.2648e-16	2.3855e-14	0.4964	2.9468	2	yes
ENSG00000011465	DCN	protein_coding	decorin	420769	3.264	5.4152e-29	6.8733e-27	684.386	4165.57	2.6048	yes
ENSG00000108960	MMD	protein_coding	monocyte to macrophage differentiation associated	7769.25	3.2614	5.486e-24	5.2058e-22	12.0094	70.3603	2.4493	yes
ENSG00000171051	FPR1	protein_coding	formyl peptide receptor 1	6294.34	3.2581	3.6646e-23	3.3184e-21	11.2802	71.7342	2.6049	no
ENSG00000144560	VGLL4	protein_coding	vestigial like family member 4	14760.2	3.2563	5.9219e-19	4.2078e-17	19.4086	114.434	2.5236	yes
ENSG00000102445	RUBCNL	protein_coding	rubicon like autophagy enhancer	1095.79	3.253	0.0018667	0.023063	0.8097	9.2113	2.3219	no
ENSG00000212418	RNY4P36	misc_RNA	RNY4 pseudogene 36	24.0588	3.2464	0.0083314	0.0814	1.206	6.2821	1.8074	no
ENSG00000148926	ADM	protein_coding	adrenomedullin	46787.8	3.2388	1.2435e-21	1.0316e-19	112.44	623.872	2.4675	yes
ENSG00000163975	MELTF	protein_coding	melanotransferrin	1484.02	3.2347	7.1039e-18	4.6068e-16	1.9827	14.05	2.3219	yes
ENSG00000137285	TUBB2B	protein_coding	tubulin beta 2B class IIb	449.909	3.2303	5.7414e-16	3.1637e-14	0.6946	4.3651	1.3219	no
ENSG00000088970	KIZ	protein_coding	kizuna centrosomal protein	3918.64	3.2235	7.4005e-20	5.5646e-18	7.3625	45.6472	2.5546	no
ENSG00000125730	C3	protein_coding	complement C3	5704.5	3.2232	2.4962e-29	3.2095e-27	4.1459	23.868	2.3219	yes
ENSG00000196843	ARID5A	protein_coding	AT-rich interaction domain 5A	821.923	3.219	8.2703e-10	2.7882e-08	1.3203	6.9314	2	no
ENSG00000273284	RP11-888D10.4	sense_intronic	NA	203.942	3.2171	6.1403e-09	1.9037e-07	0.7581	4.1947	1.3219	no
ENSG00000141753	IGFBP4	protein_coding	insulin like growth factor binding protein 4	755577	3.2083	4.0042e-22	3.4273e-20	1127.92	6242.67	2.4674	no
ENSG00000136630	HLX	protein_coding	H2.0 like homeobox	5541.24	3.1986	3.8234e-11	1.4691e-09	7.8748	55.2339	2.6374	no
ENSG00000105088	OLFM2	protein_coding	olfactomedin 2	306.342	3.1947	9.8453e-10	3.3041e-08	0.8047	4.2335	1.3219	no
ENSG00000182326	C1S	protein_coding	complement C1s	38317.4	3.1851	5.4621e-30	7.2425e-28	55.5264	312.648	2.4617	yes
ENSG00000003402	CFLAR	protein_coding	CASP8 and FADD like apoptosis regulator	46187.7	3.1836	1.9662e-23	1.7859e-21	66.462	415.291	2.6344	no
ENSG00000109906	ZBTB16	protein_coding	zinc finger and BTB domain containing 16	7243.74	3.1805	2.6656e-24	2.5705e-22	12.037	71.8188	2.4894	yes
ENSG00000113739	STC2	protein_coding	stanniocalcin 2	210394	3.1789	6.8331e-24	6.4274e-22	268.796	1615.36	2.5814	no
ENSG00000253542	SDR16C6P	transcribed_unitary_pseudogene	short chain dehydrogenase/reductase family 16C member 6, pseudogene	42.5333	3.1757	0.0062347	0.0638	0.6005	3.5421	1.3219	no
ENSG00000115380	EFEMP1	protein_coding	EGF containing fibulin extracellular matrix protein 1	108128	3.1739	5.7815e-28	6.8142e-26	144.173	843.881	2.5429	yes
ENSG00000112245	PTP4A1	protein_coding	protein tyrosine phosphatase 4A1	68967.1	3.1718	2.0626e-10	7.4255e-09	66.7007	426.497	2.6506	no
ENSG00000125740	FOSB	protein_coding	FosB proto-oncogene, AP-1 transcription factor subunit	380.166	3.1711	9.738e-08	2.5778e-06	0.4302	2.3792	1.585	no
ENSG00000146278	PNRC1	protein_coding	proline rich nuclear receptor coactivator 1	11672.6	3.1639	9.8231e-19	6.8487e-17	20.5443	129.073	2.5629	yes
ENSG00000104419	NDRG1	protein_coding	N-myc downstream regulated 1	20058	3.1635	9.999e-30	1.3083e-27	29.3753	167.864	2.494	yes
ENSG00000169908	TM4SF1	protein_coding	transmembrane 4 L six family member 1	43868.8	3.1623	6.6846e-11	2.526e-09	96.3374	606.255	2.6456	no
ENSG00000165029	ABCA1	protein_coding	ATP binding cassette subfamily A member 1	6612.15	3.1597	6.7195e-18	4.3959e-16	2.5246	11.3741	1.585	yes
ENSG00000283352	GUSBP1	lincRNA	LINC00680-GUSBP4 readthrough	74.0603	3.149	0.0015885	0.020001	0.4667	2.7824	2	yes
ENSG00000229190	RP11-390B4.3	antisense	NA	69.6606	3.1401	0.0020799	0.025266	0.7142	4.646	1.585	no
ENSG00000163017	ACTG2	protein_coding	actin gamma 2, smooth muscle	414.068	3.1371	1.5611e-13	7.1221e-12	1.2983	6.7212	2	no
ENSG00000133639	BTG1	protein_coding	BTG anti-proliferation factor 1	11597.4	3.133	7.6063e-19	5.379e-17	8.7494	52.4556	2.406	yes
ENSG00000234136	AC055764.1	antisense	NA	88.1038	3.1307	0.0018421	0.022806	0.8857	7.3555	2	no
ENSG00000173334	TRIB1	protein_coding	tribbles pseudokinase 1	2042.27	3.1154	3.2795e-17	2.025e-15	1.8833	11.5174	2.1155	no
ENSG00000036672	USP2	protein_coding	ubiquitin specific peptidase 2	460.278	3.1146	1.1773e-12	5.1422e-11	0.5974	3.4498	1	no
ENSG00000226334	RP11-217B7.2	antisense	NA	53.136	3.0982	0.0019669	0.02412	0.4799	3.9335	2.3219	yes
ENSG00000059804	SLC2A3	protein_coding	solute carrier family 2 member 3	16925.2	3.0897	6.9866e-22	5.8785e-20	15.297	85.507	2.4429	no
ENSG00000182118	FAM89A	protein_coding	family with sequence similarity 89 member A	1036.29	3.0862	1.4958e-12	6.4764e-11	2.4954	11.9586	2.1155	yes
ENSG00000162148	PPP1R32	protein_coding	protein phosphatase 1 regulatory subunit 32	554.139	3.0829	4.292e-14	2.0364e-12	2.4013	11.8224	2.1155	no
ENSG00000267009	RP11-120M18.2	processed_transcript	NA	142.104	3.0811	7.6806e-05	0.0013263	1.2193	8.5762	2.3219	no
ENSG00000157214	STEAP2	protein_coding	STEAP2 metalloreductase	12545.9	3.0803	2.6179e-24	2.5327e-22	6.7238	37.6895	2.2854	no
ENSG00000197971	MBP	protein_coding	myelin basic protein	810.108	3.076	1.2937e-10	4.7613e-09	1.8556	10.0539	1.8745	no
ENSG00000060718	COL11A1	protein_coding	collagen type XI alpha 1 chain	168760	3.0749	3.4058e-28	4.0788e-26	96.6197	495.012	2.3395	yes
ENSG00000159403	C1R	protein_coding	complement C1r	9231.86	3.0726	2.3521e-25	2.3762e-23	21.489	107.058	2.2955	yes
ENSG00000177989	ODF3B	protein_coding	outer dense fiber of sperm tails 3B	509.552	3.0694	1.2785e-07	3.3486e-06	2.9409	13.8824	1.9069	no
ENSG00000173432	SAA1	protein_coding	serum amyloid A1	990.996	3.0649	1.426e-11	5.7313e-10	8.2001	49.1806	2.4739	yes
ENSG00000113389	NPR3	protein_coding	natriuretic peptide receptor 3	143226	3.0646	3.862e-28	4.6067e-26	74.876	415.033	2.4525	yes
ENSG00000047648	ARHGAP6	protein_coding	Rho GTPase activating protein 6	1847.57	3.0644	5.5682e-14	2.6168e-12	2.0208	10.009	1.8745	no
ENSG00000168734	PKIG	protein_coding	cAMP-dependent protein kinase inhibitor gamma	6933.44	3.0616	3.0082e-15	1.5325e-13	25.0886	131.312	2.344	no
ENSG00000112769	LAMA4	protein_coding	laminin subunit alpha 4	18394.3	3.057	4.9265e-25	4.8774e-23	13.1692	71.7555	2.3825	yes
ENSG00000229960	RP11-278H7.4	lincRNA	NA	72.5175	3.053	0.00088892	0.011866	1.2487	4.6398	1.585	no
ENSG00000102804	TSC22D1	protein_coding	TSC22 domain family member 1	37467.8	3.0518	1.038e-15	5.5749e-14	38.5684	225.137	2.4983	yes
ENSG00000064655	EYA2	protein_coding	EYA transcriptional coactivator and phosphatase 2	5378.7	3.0517	3.3493e-22	2.9087e-20	7.9095	38.408	2.1155	yes
ENSG00000162595	DIRAS3	protein_coding	DIRAS family GTPase 3	355.468	3.0499	5.9949e-11	2.2769e-09	0.7217	3.2206	1	no
ENSG00000138378	STAT4	protein_coding	signal transducer and activator of transcription 4	1407.59	3.0489	6.113e-16	3.3498e-14	2.3893	13.55	2.3219	no
ENSG00000152527	PLEKHH2	protein_coding	pleckstrin homology, MyTH4 and FERM domain containing H2	2026.91	3.0419	8.5299e-10	2.8724e-08	1.5441	8.8252	1.737	yes
ENSG00000177954	RPS27	protein_coding	ribosomal protein S27	2146.82	3.0328	3.5207e-09	1.1148e-07	30.3139	148.105	2.265	no
ENSG00000125398	SOX9	protein_coding	SRY-box transcription factor 9	4481.34	3.0307	3.4277e-11	1.3273e-09	4.1232	15.2643	1.6781	no
ENSG00000204381	LAYN	protein_coding	layilin	9629.23	3.0264	1.146e-20	9.1251e-19	19.7941	96.425	2.2076	yes
ENSG00000215695	RSC1A1	protein_coding	regulator of solute carriers 1	977.687	3.0252	0.0040435	0.044354	1.8781	10.2442	1.8745	no
ENSG00000087086	FTL	protein_coding	ferritin light chain	273820	3.0188	2.5193e-16	1.4253e-14	1371.06	6924.36	2.3355	no
ENSG00000234233	KCNH1-IT1	sense_intronic	NA	105.509	3.0182	0.0014147	0.017994	0.7134	5.6327	1.8074	no
ENSG00000006704	GTF2IRD1	protein_coding	GTF2I repeat domain containing 1	10518.8	3.0165	1.1346e-15	6.0282e-14	11.883	71.5816	2.4894	no
ENSG00000140044	JDP2	protein_coding	Jun dimerization protein 2	3359.3	3.0071	1.3961e-23	1.2958e-21	9.0072	43.4007	2.1375	yes
ENSG00000157557	ETS2	protein_coding	ETS proto-oncogene 2, transcription factor	1983.41	2.9964	3.0013e-08	8.4656e-07	2.4778	13.0613	2.2224	no
ENSG00000114757	PEX5L	protein_coding	peroxisomal biogenesis factor 5 like	1084.05	2.9951	4.8218e-11	1.8503e-09	1.2017	6.8505	2	no
ENSG00000184500	PROS1	protein_coding	protein S	4883.09	2.9946	2.3038e-08	6.6176e-07	5.3345	24.7483	2.1155	yes
ENSG00000166793	YPEL4	protein_coding	yippee like 4	654.35	2.9855	5.9208e-12	2.4699e-10	1.0033	4.7549	1.585	no
ENSG00000206532	RP11-553A10.1	lincRNA	NA	93.6915	2.9797	0.00034557	0.0051371	0.43	2.5336	2	no
ENSG00000186480	INSIG1	protein_coding	insulin induced gene 1	12677.1	2.9793	3.7478e-11	1.4419e-09	16.9334	85.9575	2.273	no
ENSG00000214140	PRCD	protein_coding	photoreceptor disc component	230.609	2.9768	7.8598e-07	1.8841e-05	1.1757	5.5439	1.8074	yes
ENSG00000105664	COMP	protein_coding	cartilage oligomeric matrix protein	14726.9	2.966	3.5527e-14	1.6965e-12	22.8962	98.4091	2.0444	yes
ENSG00000125772	GPCPD1	protein_coding	glycerophosphocholine phosphodiesterase 1	10601.9	2.9645	2.9511e-17	1.8375e-15	9.5747	42.7289	2	no
ENSG00000227006	RP5-956O18.2	antisense	NA	273.631	2.9626	1.5817e-06	3.6588e-05	1.5284	7.4578	1.415	no
ENSG00000266714	MYO15B	protein_coding	myosin XVB	265.187	2.9614	1.3023e-06	3.0431e-05	1.5576	5.6373	1.2224	yes
ENSG00000260552	RP11-49I11.1	antisense	cell fate and sterol metabolism associated divergent transcript of MOCOS	182.798	2.9585	2.4326e-06	5.507e-05	1.5778	7.7902	1.585	no
ENSG00000119986	AVPI1	protein_coding	arginine vasopressin induced 1	3700.87	2.9467	3.133e-13	1.4077e-11	9.4326	50.3902	2.3505	no
ENSG00000077942	FBLN1	protein_coding	fibulin 1	168028	2.9395	7.6217e-20	5.7165e-18	258.681	1228.6	2.2421	yes
ENSG00000274180	NATD1	protein_coding	N-acetyltransferase domain containing 1	3599.21	2.9372	1.5091e-17	9.5776e-16	2.3987	10.7018	2	yes
ENSG00000164066	INTU	protein_coding	inturned planar cell polarity protein	10128.9	2.9363	1.5019e-12	6.4932e-11	6.7333	31.4168	2	no
ENSG00000102409	BEX4	protein_coding	brain expressed X-linked 4	586.554	2.9342	1.1365e-06	2.6789e-05	1.632	10.0075	1.8745	no
ENSG00000150540	HNMT	protein_coding	histamine N-methyltransferase	4869.32	2.9301	3.074e-20	2.3901e-18	23.2976	116.749	2.2977	yes
ENSG00000119711	ALDH6A1	protein_coding	aldehyde dehydrogenase 6 family member A1	14728.7	2.9298	8.0273e-19	5.6631e-17	17.0165	81.9858	2.2051	no
ENSG00000211455	STK38L	protein_coding	serine/threonine kinase 38 like	17864.8	2.9193	2.6523e-19	1.9356e-17	19.6611	96.0058	2.2076	no
ENSG00000106823	ECM2	protein_coding	extracellular matrix protein 2	4381.5	2.9034	1.6976e-10	6.1562e-09	4.5644	31.6921	2.4594	yes
ENSG00000168955	TM4SF20	protein_coding	transmembrane 4 L six family member 20	923.142	2.8996	6.0494e-10	2.0747e-08	1.5182	8.0685	1.585	no
ENSG00000271716	RP11-169K17.4	antisense	NA	75.87	2.8963	0.0032951	0.03734	1.0805	4.4892	1.3219	no
ENSG00000080546	SESN1	protein_coding	sestrin 1	7951.72	2.8958	6.7749e-17	4.0733e-15	11.548	56.684	2.1575	yes
ENSG00000244219	GS1-259H13.2	lincRNA	transmembrane protein 225B	95.088	2.893	0.00018717	0.0029461	0.4602	2.2221	1.585	no
ENSG00000115594	IL1R1	protein_coding	interleukin 1 receptor type 1	37817.6	2.8925	9.6174e-21	7.6786e-19	33.3972	163.372	2.2701	yes
ENSG00000196569	LAMA2	protein_coding	laminin subunit alpha 2	25534.5	2.8903	9.1421e-21	7.3189e-19	10.3429	48.8073	2.1844	yes
ENSG00000258949	RP11-857B24.5	antisense	uncharacterized LOC101927418	74.3269	2.8894	0.0039622	0.043698	1.8913	8.8632	1.737	no
ENSG00000109787	KLF3	protein_coding	Kruppel like factor 3	5756.43	2.8867	2.9015e-09	9.2964e-08	5.7545	26.7344	2	no
ENSG00000139329	LUM	protein_coding	lumican	36978.3	2.8856	1.114e-18	7.7305e-17	94.0492	422.771	2.1581	yes
ENSG00000116675	DNAJC6	protein_coding	DnaJ heat shock protein family (Hsp40) member C6	3919.96	2.8808	1.4288e-19	1.053e-17	3.8501	18.5366	2	yes
ENSG00000126353	CCR7	protein_coding	C-C motif chemokine receptor 7	629.278	2.88	1.1254e-08	3.3526e-07	1.0567	4.9893	1.585	no
ENSG00000151229	SLC2A13	protein_coding	solute carrier family 2 member 13	3514.28	2.8791	3.3008e-16	1.8568e-14	2.1358	9.6019	1.8745	no
ENSG00000188042	ARL4C	protein_coding	ADP ribosylation factor like GTPase 4C	5023.79	2.8786	1.6434e-07	4.226e-06	4.296	22.5196	2.263	no
ENSG00000177076	ACER2	protein_coding	alkaline ceramidase 2	484.015	2.8781	3.4834e-11	1.3471e-09	0.6214	2.9897	1	yes
ENSG00000223891	OSER1-AS1	lincRNA	OSER1 divergent transcript	919.802	2.8728	8.016e-14	3.7269e-12	2.8041	13.1374	1.8074	yes
ENSG00000118526	TCF21	protein_coding	transcription factor 21	6255.98	2.87	4.939e-16	2.7419e-14	5.462	22.3397	1.9386	no
ENSG00000109445	ZNF330	protein_coding	zinc finger protein 330	9282.3	2.8545	1.0773e-17	6.8662e-16	26.8613	122.084	2.1352	no
ENSG00000224032	EPB41L4A-AS1	lincRNA	NA	2703.13	2.8521	1.0817e-09	3.6097e-08	8.0959	43.49	2.2895	no
ENSG00000188313	PLSCR1	protein_coding	phospholipid scramblase 1	6674.21	2.849	7.9181e-17	4.7035e-15	25.6288	116.716	2.1278	yes
ENSG00000138764	CCNG2	protein_coding	cyclin G2	8625.91	2.8479	4.466e-20	3.4187e-18	12.8899	54.1247	1.974	yes
ENSG00000143322	ABL2	protein_coding	ABL proto-oncogene 2, non-receptor tyrosine kinase	19148.5	2.8444	3.1085e-14	1.4963e-12	13.9682	57.8862	1.9758	no
ENSG00000147408	CSGALNACT1	protein_coding	chondroitin sulfate N-acetylgalactosaminyltransferase 1	435.42	2.8443	7.2812e-09	2.2318e-07	0.6992	3.1018	1	no
ENSG00000230623	RP11-469A15.2	lincRNA	NA	153.174	2.8415	0.00012053	0.0019845	0.6629	3.5131	1.3219	no
ENSG00000006652	IFRD1	protein_coding	interferon related developmental regulator 1	14368.3	2.8388	3.3569e-12	1.4325e-10	30.5206	153.54	2.2761	no
ENSG00000064393	HIPK2	protein_coding	homeodomain interacting protein kinase 2	102618	2.8374	1.582e-18	1.0902e-16	39.3856	181.046	2.1859	no
ENSG00000131370	SH3BP5	protein_coding	SH3 domain binding protein 5	7775.57	2.8367	4.4272e-10	1.5397e-08	10.7961	53.0453	2.1699	no
ENSG00000170776	AKAP13	protein_coding	A-kinase anchoring protein 13	36851.1	2.8296	1.5184e-14	7.5041e-13	29.1989	130.304	2.1265	no
ENSG00000250722	SEPP1	protein_coding	selenoprotein P	214.46	2.828	3.8944e-05	0.0007171	0.4755	2.344	1.585	yes
ENSG00000158290	CUL4B	protein_coding	cullin 4B	43530.8	2.8273	1.4507e-20	1.1521e-18	40.9341	170.534	2.0339	no
ENSG00000122641	INHBA	protein_coding	inhibin subunit beta A	27816.6	2.8179	4.1074e-17	2.505e-15	20.2554	92.2717	2.1468	yes
ENSG00000085511	MAP3K4	protein_coding	mitogen-activated protein kinase kinase kinase 4	6913.89	2.8173	8.4306e-09	2.5629e-07	13.0302	51.8846	1.9206	no
ENSG00000166816	LDHD	protein_coding	lactate dehydrogenase D	986.172	2.8107	1.497e-07	3.8865e-06	1.8403	9.4428	1.737	no
ENSG00000176046	NUPR1	protein_coding	nuclear protein 1, transcriptional regulator	8918.01	2.8072	4.7244e-09	1.4755e-07	36.9121	173.578	2.2033	yes
ENSG00000184347	SLIT3	protein_coding	slit guidance ligand 3	17498	2.8048	1.2605e-18	8.7268e-17	8.6118	41.2833	2.0704	yes
ENSG00000173085	COQ2	protein_coding	coenzyme Q2, polyprenyltransferase	398.946	2.8021	0.00028181	0.004266	1.1382	4.4257	1.3219	no
ENSG00000233382	NKAPP1	transcribed_processed_pseudogene	NFKB activating protein pseudogene 1	160.871	2.8018	0.00057336	0.0080289	0.749	3.9714	1.3219	no
ENSG00000183762	KREMEN1	protein_coding	kringle containing transmembrane protein 1	2286.41	2.8011	4.4809e-14	2.1192e-12	1.5291	6.1547	1.2224	yes
ENSG00000155792	DEPTOR	protein_coding	DEP domain containing MTOR interacting protein	525.591	2.8005	1.4212e-12	6.1805e-11	0.9048	3.7795	1.3219	no
ENSG00000034239	EFCAB1	protein_coding	EF-hand calcium binding domain 1	201.862	2.7991	0.00011958	0.0019725	0.6181	3.5439	1.3219	no
ENSG00000100344	PNPLA3	protein_coding	patatin like phospholipase domain containing 3	2227.56	2.7987	3.3625e-07	8.3503e-06	6.8898	33.2717	2.0875	yes
ENSG00000196562	SULF2	protein_coding	sulfatase 2	6164.2	2.7972	1.3628e-19	1.0069e-17	8.4739	40.5487	2.2224	yes
ENSG00000055813	CCDC85A	protein_coding	coiled-coil domain containing 85A	1783.66	2.795	1.2902e-07	3.3762e-06	1.5068	8.0834	1.585	no
ENSG00000100307	CBX7	protein_coding	chromobox 7	1192.79	2.7896	4.6128e-09	1.4452e-07	1.5391	7.344	1.415	yes
ENSG00000196549	MME	protein_coding	membrane metalloendopeptidase	215268	2.7872	3.3728e-19	2.4314e-17	282.789	1232.72	2.1194	yes
ENSG00000132170	PPARG	protein_coding	peroxisome proliferator activated receptor gamma	1805.15	2.7844	1.0111e-13	4.6705e-12	4.5641	18.7608	1.737	yes
ENSG00000139946	PELI2	protein_coding	pellino E3 ubiquitin protein ligase family member 2	1478.5	2.784	7.0287e-11	2.6492e-09	1.0283	4.5761	1.585	no
ENSG00000188906	LRRK2	protein_coding	leucine rich repeat kinase 2	2577.69	2.7785	5.3534e-15	2.6813e-13	1.3744	5.688	1.8074	yes
ENSG00000205221	VIT	protein_coding	vitrin	1150.23	2.7688	1.0449e-14	5.1898e-13	2.8085	12.1137	1.7004	yes
ENSG00000187288	CIDEC	protein_coding	cell death inducing DFFA like effector c	1933.78	2.7673	6.285e-09	1.9465e-07	8.3234	29.6235	1.7843	yes
ENSG00000154928	EPHB1	protein_coding	EPH receptor B1	1358.46	2.7616	1.0419e-11	4.2509e-10	1.682	6.4651	1.2224	no
ENSG00000069667	RORA	protein_coding	RAR related orphan receptor A	14362	2.7597	7.6542e-12	3.1707e-10	11.0751	47.9923	2.0297	no
ENSG00000153094	BCL2L11	protein_coding	BCL2 like 11	669.059	2.7567	2.2721e-06	5.183e-05	1.8492	6.2545	1.2224	no
ENSG00000127241	MASP1	protein_coding	mannan binding lectin serine peptidase 1	371.095	2.7554	2.8527e-05	0.00053933	0.6285	2.7224	1	no
ENSG00000173838	44265	protein_coding	membrane associated ring-CH-type finger 10	697.797	2.753	1.5476e-07	4.0108e-06	2.8428	10.0817	1.4594	no
ENSG00000135312	HTR1B	protein_coding	5-hydroxytryptamine receptor 1B	376.658	2.7472	2.5391e-07	6.391e-06	0.818	3.3932	1	no
ENSG00000049246	PER3	protein_coding	period circadian regulator 3	675.435	2.7456	8.3511e-07	1.9981e-05	0.966	4.2504	1.3219	yes
ENSG00000165312	OTUD1	protein_coding	OTU deubiquitinase 1	963.302	2.7385	1.5777e-10	5.7355e-09	1.1151	5.478	1.585	yes
ENSG00000204941	PSG5	protein_coding	pregnancy specific beta-1-glycoprotein 5	527.799	2.7372	6.1749e-11	2.3423e-09	1.5753	7.4413	1.415	no
ENSG00000116016	EPAS1	protein_coding	endothelial PAS domain protein 1	20641.3	2.736	2.2191e-21	1.8257e-19	16.3348	68.969	2.0418	yes
ENSG00000113742	CPEB4	protein_coding	cytoplasmic polyadenylation element binding protein 4	9292.63	2.7283	1.4776e-18	1.0206e-16	6.905	27.4803	1.8074	no
ENSG00000158747	NBL1	protein_coding	NBL1, DAN family BMP antagonist	32360.2	2.7272	4.5457e-13	2.0272e-11	69.4864	270.088	1.9529	yes
ENSG00000185650	ZFP36L1	protein_coding	ZFP36 ring finger protein like 1	77494.1	2.7264	2.4438e-18	1.6496e-16	95.3294	423.063	2.143	no
ENSG00000075651	PLD1	protein_coding	phospholipase D1	1791.99	2.726	5.5108e-06	0.00011784	2.8831	17.9124	2.2479	no
ENSG00000164056	SPRY1	protein_coding	sprouty RTK signaling antagonist 1	4649.09	2.7239	4.4589e-12	1.8732e-10	12.2289	53.6503	2.0809	yes
ENSG00000081189	MEF2C	protein_coding	myocyte enhancer factor 2C	1793.65	2.7194	2.0217e-07	5.1454e-06	2.5162	11.9209	1.7004	no
ENSG00000153823	PID1	protein_coding	phosphotyrosine interaction domain containing 1	1890.96	2.7161	3.8353e-12	1.6273e-10	3.101	14.2838	1.9069	yes
ENSG00000101017	CD40	protein_coding	CD40 molecule	195.223	2.7096	0.00011654	0.0019294	0.47	2.4797	1.585	no
ENSG00000136436	CALCOCO2	protein_coding	calcium binding and coiled-coil domain 2	35649.7	2.7085	9.4543e-19	6.6071e-17	94.1404	379.484	2	yes
ENSG00000133065	SLC41A1	protein_coding	solute carrier family 41 member 1	13478	2.7035	7.8639e-17	4.6811e-15	13.3889	52.6759	1.9475	no
ENSG00000243056	EIF4EBP3	protein_coding	eukaryotic translation initiation factor 4E binding protein 3	412.461	2.6987	3.9979e-10	1.397e-08	3.5874	15.0566	1.6781	no
ENSG00000115009	CCL20	protein_coding	C-C motif chemokine ligand 20	237.61	2.6987	6.4507e-06	0.00013607	1.43	7.3969	2	no
ENSG00000172059	KLF11	protein_coding	Kruppel like factor 11	808.656	2.6982	4.1239e-12	1.7423e-10	0.8355	3.3016	1	yes
ENSG00000174028	FAM3C2	processed_pseudogene	NA	1293.11	2.6928	5.0828e-14	2.3925e-12	13.3271	48.6865	1.8365	no
ENSG00000166900	STX3	protein_coding	syntaxin 3	1199.14	2.69	1.0528e-09	3.5174e-08	4.9741	17.9322	1.663	yes
ENSG00000174738	NR1D2	protein_coding	nuclear receptor subfamily 1 group D member 2	4750.87	2.6876	6.2428e-18	4.1022e-16	4.7031	16.6974	1.585	yes
ENSG00000129226	CD68	protein_coding	CD68 molecule	8998.85	2.6874	9.0848e-13	3.9856e-11	23.4443	92.6867	1.9696	no
ENSG00000041982	TNC	protein_coding	tenascin C	78651.7	2.6847	6.874e-18	4.4773e-16	46.5155	194.597	2.0297	yes
ENSG00000197329	PELI1	protein_coding	pellino E3 ubiquitin protein ligase 1	2377.48	2.6767	4.661e-09	1.4572e-07	2.7295	13.5002	1.9069	no
ENSG00000070540	WIPI1	protein_coding	WD repeat domain, phosphoinositide interacting 1	18336.6	2.6764	6.7212e-14	3.1487e-12	58.9233	246.158	2.0415	no
ENSG00000163995	ABLIM2	protein_coding	actin binding LIM protein family member 2	196.412	2.671	0.0039767	0.04381	0.3103	2.2192	1.585	no
ENSG00000109099	PMP22	protein_coding	peripheral myelin protein 22	16670.9	2.6704	8.0183e-14	3.7269e-12	42.7737	171.633	1.9752	yes
ENSG00000229915	AC016999.2	antisense	NA	114.572	2.6694	0.0018563	0.022953	2.5807	8.022	1.1699	no
ENSG00000078053	AMPH	protein_coding	amphiphysin	2320.31	2.6686	8.948e-12	3.6809e-10	4.2555	19.866	2.0704	no
ENSG00000154188	ANGPT1	protein_coding	angiopoietin 1	42030.9	2.6677	9.1878e-17	5.4252e-15	48.0913	195.463	2	yes
ENSG00000095303	PTGS1	protein_coding	prostaglandin-endoperoxide synthase 1	10946.2	2.6624	1.429e-13	6.5496e-12	12.2987	45.5531	1.8541	no
ENSG00000132386	SERPINF1	protein_coding	serpin family F member 1	46038.5	2.6606	4.7533e-13	2.1135e-11	178.9	657.849	1.8723	yes
ENSG00000141458	NPC1	protein_coding	NPC intracellular cholesterol transporter 1	13472.4	2.6589	2.9633e-17	1.8413e-15	18.3936	72.8209	1.9615	no
ENSG00000128590	DNAJB9	protein_coding	DnaJ heat shock protein family (Hsp40) member B9	7137.1	2.6589	1.281e-08	3.7972e-07	12.4404	61.3119	2.2538	no
ENSG00000139793	MBNL2	protein_coding	muscleblind like splicing regulator 2	9818.16	2.654	2.5516e-18	1.7185e-16	10.7138	40.8759	1.8074	yes
ENSG00000173641	HSPB7	protein_coding	heat shock protein family B (small) member 7	4987.64	2.6537	2.0749e-09	6.7722e-08	12.1294	42.5859	1.759	no
ENSG00000106799	TGFBR1	protein_coding	transforming growth factor beta receptor 1	14666.5	2.6529	8.9908e-20	6.6926e-18	11.9646	46.3104	1.8541	no
ENSG00000117318	ID3	protein_coding	inhibitor of DNA binding 3, HLH protein	9059.86	2.6503	1.0181e-09	3.409e-08	53.0997	210.393	1.9662	no
ENSG00000283060	ID3	protein_coding	inhibitor of DNA binding 3, HLH protein	9059.86	2.6503	1.0181e-09	3.409e-08	53.0997	210.393	1.9662	no
ENSG00000179094	PER1	protein_coding	period circadian regulator 1	24986.4	2.6494	2.4218e-10	8.6559e-09	57.2369	229.812	1.9938	no
ENSG00000226526	RP1-37C10.3	antisense	NA	78.9235	2.6462	0.0057474	0.0596	0.8572	2.9087	1	no
ENSG00000205309	NT5M	protein_coding	5',3'-nucleotidase, mitochondrial	155.336	2.6448	0.0008678	0.011647	0.9036	2.8636	1	no
ENSG00000170276	HSPB2	protein_coding	heat shock protein family B (small) member 2	974.895	2.6437	3.1584e-07	7.8631e-06	7.6821	26.3188	1.585	no
ENSG00000283151	AL049829.1	protein_coding	NA	842.294	2.6399	1.613e-09	5.3349e-08	2.5526	10.417	1.4594	no
ENSG00000232712	KIZ-AS1	antisense	KIZ antisense RNA 1	240.718	2.6383	1.6539e-06	3.8138e-05	1.2589	5.9542	1.8074	no
ENSG00000106415	GLCCI1	protein_coding	glucocorticoid induced 1	3626.38	2.6305	7.5045e-14	3.5101e-12	6.0384	25.0037	1.8931	no
ENSG00000103260	METRN	protein_coding	meteorin, glial cell differentiation regulator	2668.57	2.6278	7.5348e-10	2.5576e-08	12.0148	40.5625	1.6919	no
ENSG00000163735	CXCL5	protein_coding	C-X-C motif chemokine ligand 5	686.58	2.6276	1.2019e-06	2.8198e-05	1.3493	4.0549	1.3219	no
ENSG00000019995	ZRANB1	protein_coding	zinc finger RANBP2-type containing 1	8911.23	2.6256	1.6366e-16	9.4203e-15	6.3202	25.3665	1.8931	no
ENSG00000185338	SOCS1	protein_coding	suppressor of cytokine signaling 1	1124.2	2.624	2.1001e-08	6.0499e-07	4.4922	17.6149	1.926	no
ENSG00000257894	RP1-78O14.1	lincRNA	NA	372.507	2.6222	2.9995e-08	8.4656e-07	1.3776	4.7282	1.585	no
ENSG00000196159	FAT4	protein_coding	FAT atypical cadherin 4	14889.8	2.6196	1.479e-15	7.7474e-14	4.3637	17.5384	1.926	no
ENSG00000275031	METRNL	protein_coding	meteorin like, glial cell differentiation regulator	5699.44	2.6055	1.0119e-06	2.4005e-05	28.6458	117.095	1.9758	no
ENSG00000071967	CYBRD1	protein_coding	cytochrome b reductase 1	75489	2.6043	4.4584e-18	2.9757e-16	82.076	309.719	1.9057	yes
ENSG00000178764	ZHX2	protein_coding	zinc fingers and homeoboxes 2	2367.44	2.6024	3.0405e-09	9.7102e-08	2.1324	9.7064	1.8745	no
ENSG00000251348	HSPD1P11	processed_pseudogene	NA	640.719	2.6018	2.197e-07	5.5629e-06	2.0949	6.2691	1.2224	no
ENSG00000215861	WI2-1896O14.1	unprocessed_pseudogene	NA	1776.52	2.6005	2.7147e-12	1.1618e-10	10.2192	41.3063	1.9329	no
ENSG00000167323	STIM1	protein_coding	stromal interaction molecule 1	16532.7	2.5918	1.569e-17	9.9362e-16	33.0143	111.642	1.7327	yes
ENSG00000111962	UST	protein_coding	uronyl 2-sulfotransferase	3434.8	2.5908	3.3235e-11	1.292e-09	3.8263	15.6427	1.7655	no
ENSG00000042062	FAM65C	protein_coding	RIPOR family member 3	446.226	2.5842	0.00086775	0.011647	0.5741	3.5563	1.3219	yes
ENSG00000147576	ADHFE1	protein_coding	alcohol dehydrogenase iron containing 1	570.789	2.5799	3.0274e-07	7.5528e-06	2.7237	7.825	1.1699	yes
ENSG00000024862	CCDC28A	protein_coding	coiled-coil domain containing 28A	1579.02	2.5797	2.7946e-08	7.9264e-07	6.5901	26.5695	1.8074	no
ENSG00000276649	RP5-858L17.1	antisense	NA	204.803	2.5793	9.135e-06	0.00018699	1.8568	6.3405	1.2224	no
ENSG00000197580	BCO2	protein_coding	beta-carotene oxygenase 2	306.203	2.5785	0.00012035	0.0019836	1.4895	3.8993	1.3219	no
ENSG00000130303	BST2	protein_coding	bone marrow stromal cell antigen 2	110.445	2.5774	0.0001351	0.0022024	0.6804	2.5629	1	yes
ENSG00000127863	TNFRSF19	protein_coding	TNF receptor superfamily member 19	18407.4	2.5762	9.8791e-16	5.3155e-14	20.3049	81.4091	1.9652	yes
ENSG00000245534	RORA-AS1	antisense	RORA antisense RNA 1	159.914	2.5754	0.010311	0.0968	2.234	6.116	1.2224	no
ENSG00000145244	CORIN	protein_coding	corin, serine peptidase	12004	2.5742	1.6549e-14	8.0841e-13	17.3414	63.7437	1.8524	yes
ENSG00000186205	MARC1	protein_coding	mitochondrial amidoxime reducing component 1	577.504	2.5722	1.5159e-08	4.4314e-07	1.3608	4.6925	1.585	yes
ENSG00000115255	REEP6	protein_coding	receptor accessory protein 6	322.395	2.5698	8.5971e-05	0.0014683	1.4636	4.8268	1.585	no
ENSG00000121749	TBC1D15	protein_coding	TBC1 domain family member 15	9140.74	2.5678	1.0472e-08	3.1386e-07	18.0755	78.0284	2.0559	no
ENSG00000181690	PLAG1	protein_coding	PLAG1 zinc finger	1730.45	2.5644	1.3755e-11	5.5505e-10	1.1482	4.4406	1.3219	yes
ENSG00000132429	POPDC3	protein_coding	popeye domain containing 3	2657.91	2.562	2.6041e-10	9.2627e-09	12.3035	42.087	1.7258	no
ENSG00000175906	ARL4D	protein_coding	ADP ribosylation factor like GTPase 4D	1884.5	2.5496	2.7526e-10	9.7561e-09	6.1162	21.54	1.7162	no
ENSG00000184588	PDE4B	protein_coding	phosphodiesterase 4B	5058.1	2.5491	3.2842e-14	1.5733e-12	8.9829	28.6066	1.585	no
ENSG00000198839	ZNF277	protein_coding	zinc finger protein 277	3735.85	2.5431	3.4806e-12	1.4832e-10	10.0726	35.6928	1.75	yes
ENSG00000169604	ANTXR1	protein_coding	ANTXR cell adhesion molecule 1	51906.2	2.5397	2.9446e-17	1.8374e-15	58.5813	211.532	1.8278	yes
ENSG00000235354	CTA-276O3.4	processed_pseudogene	NA	68.6689	2.5374	0.0055203	0.0577	7.1487	23.7867	1.6439	no
ENSG00000179476	C14orf28	protein_coding	chromosome 14 open reading frame 28	1343.95	2.5372	1.8435e-09	6.0568e-08	3.4758	13.1944	1.8074	no
ENSG00000144152	FBLN7	protein_coding	fibulin 7	463.835	2.535	1.7638e-07	4.5199e-06	0.8604	3.2176	1	yes
ENSG00000134853	PDGFRA	protein_coding	platelet derived growth factor receptor alpha	61357.9	2.5332	3.7147e-14	1.7653e-12	66.8693	250.733	1.8898	yes
ENSG00000143013	LMO4	protein_coding	LIM domain only 4	6850.21	2.5326	7.3162e-08	1.9665e-06	18.8384	70.6377	1.848	no
ENSG00000278970	HEIH	TEC	hepatocellular carcinoma up-regulated EZH2-associated long non-coding RNA	2817.17	2.5326	2.5005e-09	8.0812e-08	8.93	31.5284	1.7225	no
ENSG00000108387	SEPT4	protein_coding	septin 4	652.191	2.5298	4.6262e-06	0.00010015	2.3588	8.9315	1.737	yes
ENSG00000007933	FMO3	protein_coding	flavin containing dimethylaniline monoxygenase 3	9324.71	2.5257	2.8899e-10	1.0182e-08	24.9894	85.6313	1.7425	yes
ENSG00000272888	LINC01578	processed_transcript	NA	4667.03	2.5254	2.1336e-08	6.1404e-07	24.5111	98.4525	1.9289	no
ENSG00000150787	PTS	protein_coding	6-pyruvoyltetrahydropterin synthase	6310.23	2.5226	3.2596e-11	1.2688e-09	48.7474	192.585	1.9561	no
ENSG00000119138	KLF9	protein_coding	Kruppel like factor 9	20781.7	2.5196	2.262e-11	8.9936e-10	18.2053	66.4594	1.8182	yes
ENSG00000261114	RP11-325K4.2	sense_intronic	NA	285.694	2.518	6.9611e-06	0.00014591	2.9488	9.6986	1.4594	no
ENSG00000119537	KDSR	protein_coding	3-ketodihydrosphingosine reductase	2322.51	2.5174	3.2023e-05	0.00059969	8.3604	28.4773	1.6881	no
ENSG00000013441	CLK1	protein_coding	CDC like kinase 1	19269.5	2.5139	1.3643e-10	5.0088e-09	42.8766	162.446	1.8893	no
ENSG00000008083	JARID2	protein_coding	jumonji and AT-rich interaction domain containing 2	3326.28	2.5103	8.0391e-09	2.4514e-07	2.6086	9.7648	1.4594	no
ENSG00000054654	SYNE2	protein_coding	spectrin repeat containing nuclear envelope protein 2	7064.21	2.5075	7.9305e-16	4.3061e-14	5.7167	18.9495	1.5146	no
ENSG00000119950	MXI1	protein_coding	MAX interactor 1, dimerization protein	2108.73	2.5053	2.6956e-09	8.674e-08	4.3985	15.5795	1.7655	no
ENSG00000174080	CTSF	protein_coding	cathepsin F	1252.14	2.5014	1.7377e-07	4.457e-06	3.2002	12.5363	1.8074	no
ENSG00000137269	LRRC1	protein_coding	leucine rich repeat containing 1	1177.99	2.4995	1.4274e-07	3.7188e-06	2.03	8.6367	1.737	no
ENSG00000165959	CLMN	protein_coding	calmin	548.383	2.4956	3.9055e-08	1.0801e-06	0.8519	2.7511	1	yes
ENSG00000163431	LMOD1	protein_coding	leiomodin 1	9240.75	2.4948	6.3369e-11	2.4007e-09	10.8332	34.5703	1.585	no
ENSG00000203722	RAET1G	protein_coding	retinoic acid early transcript 1G	172.699	2.4945	6.336e-05	0.0011195	0.7728	3.0543	1	no
ENSG00000180875	GREM2	protein_coding	gremlin 2, DAN family BMP antagonist	985.318	2.4893	1.4393e-08	4.2325e-07	0.9323	3.3355	1	no
ENSG00000185262	UBALD2	protein_coding	UBA like domain containing 2	2283.05	2.4874	2.3735e-07	5.9997e-06	9.0496	31.8305	1.7225	no
ENSG00000227036	LINC00511	lincRNA	long intergenic non-protein coding RNA 511	319.232	2.4858	1.1339e-05	0.00022989	1.1224	3.3422	1	no
ENSG00000106299	WASL	protein_coding	WASP like actin nucleation promoting factor	13977.3	2.485	4.4205e-14	2.094e-12	15.1011	50.652	1.7004	yes
ENSG00000273243	CTA-217C2.2	lincRNA	NA	199.341	2.4771	6.9199e-05	0.0012111	3.3975	15.3693	2	no
ENSG00000186187	ZNRF1	protein_coding	zinc and ring finger 1	3813.46	2.4739	7.275e-06	0.00015163	9.8459	36.0327	1.75	no
ENSG00000165389	SPTSSA	protein_coding	serine palmitoyltransferase small subunit A	10477.8	2.4731	3.6162e-11	1.3931e-09	17.358	60.7586	1.7843	no
ENSG00000006459	KDM7A	protein_coding	lysine demethylase 7A	2090.33	2.4707	6.3535e-09	1.9657e-07	1.0626	4.1517	1.3219	yes
ENSG00000009413	REV3L	protein_coding	REV3 like, DNA directed polymerase zeta catalytic subunit	18308.1	2.4666	3.5542e-10	1.2463e-08	24.6053	78.2813	1.6033	no
ENSG00000234487	HLA-F	protein_coding	major histocompatibility complex, class I, F	282.873	2.4625	0.00047546	0.0067861	1.6657	5.9886	1.2224	no
ENSG00000150995	ITPR1	protein_coding	inositol 1,4,5-trisphosphate receptor type 1	3366.27	2.4608	2.3171e-08	6.6493e-07	1.6714	7.289	1.415	no
ENSG00000241472	PTPRG-AS1	processed_transcript	PTPRG antisense RNA 1	408.869	2.4564	0.00038703	0.0056739	1.489	7.244	2	no
ENSG00000147119	CHST7	protein_coding	carbohydrate sulfotransferase 7	11884.4	2.4533	1.9496e-07	4.9662e-06	29.5789	84.7865	1.4721	no
ENSG00000008853	RHOBTB2	protein_coding	Rho related BTB domain containing 2	7492.13	2.453	2.7874e-09	8.9501e-08	7.1635	25.1334	1.7004	no
ENSG00000137880	GCHFR	protein_coding	GTP cyclohydrolase I feedback regulator	221.766	2.4455	0.00026392	0.0040116	2.263	7.1782	1.415	yes
ENSG00000153531	ADPRHL1	protein_coding	ADP-ribosylhydrolase like 1	2078.35	2.4381	8.7943e-12	3.6278e-10	1.2552	4.3093	1.3219	no
ENSG00000164823	OSGIN2	protein_coding	oxidative stress induced growth inhibitor family member 2	1702.15	2.4345	2.2897e-05	0.00043933	2.7801	9.1851	1.3219	yes
ENSG00000100439	ABHD4	protein_coding	abhydrolase domain containing 4, N-acyl phospholipase B	5648.04	2.4327	1.581e-09	5.2348e-08	10.803	38.5161	1.737	yes
ENSG00000165124	SVEP1	protein_coding	sushi, von Willebrand factor type A, EGF and pentraxin domain containing 1	17431.2	2.432	2.424e-12	1.0389e-10	7.5417	21.2649	1.2895	yes
ENSG00000272288	RP11-140K17.3	antisense	ILRUN antisense RNA 1	81.4882	2.4309	0.0015873	0.019994	2.0294	7.021	1.415	no
ENSG00000166073	GPR176	protein_coding	G protein-coupled receptor 176	16266.3	2.429	2.6011e-11	1.0232e-09	21.6869	71.1699	1.6464	no
ENSG00000249715	FER1L5	protein_coding	fer-1 like family member 5	585.458	2.4268	3.0158e-06	6.7247e-05	0.8273	2.5644	1	no
ENSG00000137501	SYTL2	protein_coding	synaptotagmin like 2	3958.03	2.426	5.1173e-10	1.7673e-08	10.4054	34.606	1.7105	no
ENSG00000272240	RP5-855D21.1	antisense	NA	235.858	2.4247	0.00016151	0.0025804	3.8003	13.6931	1.585	no
ENSG00000134686	PHC2	protein_coding	polyhomeotic homolog 2	48760.3	2.4245	1.0217e-10	3.7978e-09	118.98	407.232	1.7655	no
ENSG00000174945	AMZ1	protein_coding	archaelysin family metallopeptidase 1	354.788	2.4237	0.0016004	0.020116	1.3105	4.0911	1.3219	no
ENSG00000213949	ITGA1	protein_coding	integrin subunit alpha 1	1559.88	2.4232	1.8e-10	6.5118e-09	2.5668	8.5486	1.3219	no
ENSG00000210082	MT-RNR2	Mt_rRNA	NA	683494	2.4207	1.1135e-06	2.6268e-05	2455.36	8498.2	1.791	no
ENSG00000044524	EPHA3	protein_coding	EPH receptor A3	1453.32	2.4162	6.9929e-10	2.3873e-08	1.1593	4.2575	1.3219	no
ENSG00000229657	RP11-494K3.2	processed_pseudogene	ribosomal protein L13a pseudogene 11	209.935	2.4148	8.2657e-05	0.0014174	2.7633	10.3301	1.4594	no
ENSG00000134242	PTPN22	protein_coding	protein tyrosine phosphatase non-receptor type 22	1822.29	2.4127	1.7097e-08	4.9639e-07	3.5175	12.5227	1.4854	no
ENSG00000272398	CD24	protein_coding	CD24 molecule	494.586	2.4123	2.7968e-08	7.9264e-07	1.3777	4.0306	1.3219	no
ENSG00000054277	OPN3	protein_coding	opsin 3	5923.95	2.4122	5.4609e-11	2.0794e-09	14.7207	48.2212	1.6147	no
ENSG00000265399	RP13-270P17.2	antisense	NA	261.924	2.4047	2.3428e-05	0.00044835	0.8017	2.6755	1	no
ENSG00000213626	LBH	protein_coding	LBH regulator of WNT signaling pathway	2292.31	2.4046	3.1048e-06	6.892e-05	4.754	13.0917	1.2224	no
ENSG00000136770	DNAJC1	protein_coding	DnaJ heat shock protein family (Hsp40) member C1	7423.81	2.4018	2.3017e-10	8.2365e-09	17.8869	61.8004	1.7294	no
ENSG00000137103	TMEM8B	protein_coding	transmembrane protein 8B	2836.74	2.3955	7.96e-09	2.4298e-07	6.3862	18.8194	1.5146	no
ENSG00000243368	MCCC1-AS1	antisense	NA	257.952	2.3918	0.00052865	0.0074558	2.4632	8.35	1.585	no
ENSG00000099860	GADD45B	protein_coding	growth arrest and DNA damage inducible beta	26647.2	2.3906	9.6608e-09	2.916e-07	125.687	374.414	1.5621	no
ENSG00000244607	CCDC13	protein_coding	coiled-coil domain containing 13	137.883	2.39	0.00027051	0.0041034	1.0309	3.4942	1	no
ENSG00000135362	PRR5L	protein_coding	proline rich 5 like	3570.9	2.3894	3.9912e-08	1.1017e-06	15.2706	51.5315	1.7279	no
ENSG00000125352	RNF113A	protein_coding	ring finger protein 113A	1865.81	2.3832	1.4261e-06	3.3142e-05	8.2349	28.3431	1.6881	no
ENSG00000150991	UBC	protein_coding	ubiquitin C	241921	2.3827	3.8236e-08	1.0594e-06	577.688	1990.65	1.7826	no
ENSG00000179241	LDLRAD3	protein_coding	low density lipoprotein receptor class A domain containing 3	9219.64	2.3756	6.2464e-12	2.602e-10	12.5083	43.1468	1.6521	yes
ENSG00000111058	ACSS3	protein_coding	acyl-CoA synthetase short chain family member 3	1885.25	2.3747	1.6995e-09	5.6022e-08	2.596	8.4662	1.1699	yes
ENSG00000228288	PCAT6	antisense	prostate cancer associated transcript 6	395.202	2.3653	1.6441e-05	0.00032554	5.2026	14.2924	1.3219	no
ENSG00000121671	CRY2	protein_coding	cryptochrome circadian regulator 2	3141.95	2.3638	1.4606e-08	4.2867e-07	6.5707	18.8897	1.3219	no
ENSG00000279765	RP11-437B10.1	protein_coding	NA	861.715	2.3635	0.00027249	0.0041291	1.1055	3.3249	1	no
ENSG00000136235	GPNMB	protein_coding	glycoprotein nmb	9613.61	2.3618	1.6124e-11	6.4628e-10	18.2566	60.3023	1.6828	yes
ENSG00000152518	ZFP36L2	protein_coding	ZFP36 ring finger protein like 2	86800.9	2.3584	2.2345e-10	8.0058e-09	109.16	379.612	1.7923	no
ENSG00000181804	SLC9A9	protein_coding	solute carrier family 9 member A9	499.401	2.3577	6.6347e-05	0.0011646	1.1641	4.0033	1.3219	yes
ENSG00000272812	RP5-855D21.3	sense_intronic	NA	150.979	2.3546	0.00077666	0.010577	2.2548	7.9288	1.585	no
ENSG00000172403	SYNPO2	protein_coding	synaptopodin 2	1176.81	2.3524	3.0286e-07	7.5528e-06	0.9407	3.0716	1	no
ENSG00000164300	SERINC5	protein_coding	serine incorporator 5	6099.21	2.3508	5.0826e-10	1.7594e-08	5.0618	16.4516	1.5025	no
ENSG00000166033	HTRA1	protein_coding	HtrA serine peptidase 1	72762.9	2.3475	1.3773e-08	4.0663e-07	250.098	755.883	1.5926	no
ENSG00000100906	NFKBIA	protein_coding	NFKB inhibitor alpha	5450.15	2.3465	8.2534e-06	0.00017035	22.907	63.7522	1.4374	no
ENSG00000242759	LINC00882	lincRNA	NA	545.53	2.3463	1.868e-05	0.00036598	4.7844	13.8893	1.3219	no
ENSG00000139132	FGD4	protein_coding	FYVE, RhoGEF and PH domain containing 4	3252.2	2.3448	3.6986e-06	8.1494e-05	4.1245	13.7421	1.585	no
ENSG00000177575	CD163	protein_coding	CD163 molecule	635.155	2.339	0.00052313	0.0073953	0.9568	5.4989	1.585	no
ENSG00000105373	GLTSCR2	protein_coding	NOP53 ribosome biogenesis factor	21149.1	2.3331	8.5653e-09	2.6012e-07	115.549	330.022	1.5003	no
ENSG00000157227	MMP14	protein_coding	matrix metallopeptidase 14	184977	2.3285	1.311e-07	3.4276e-06	337.776	1059.42	1.6447	no
ENSG00000143387	CTSK	protein_coding	cathepsin K	33815.3	2.3266	1.7926e-06	4.1241e-05	118.956	405.512	1.762	no
ENSG00000122547	EEPD1	protein_coding	endonuclease/exonuclease/phosphatase family domain containing 1	837.608	2.3265	5.5148e-05	0.00098735	2.2752	6.7037	1.415	yes
ENSG00000258677	RP11-463D19.2	protein_coding	NA	248.366	2.319	5.5273e-05	0.00098896	2.256	6.4508	1.2224	no
ENSG00000198918	RPL39	protein_coding	ribosomal protein L39	53641.1	2.3187	8.4752e-08	2.2616e-06	1890.52	5194.79	1.4575	no
ENSG00000241878	PISD	protein_coding	phosphatidylserine decarboxylase	10808.1	2.3137	7.3097e-09	2.2382e-07	32.2195	91.7661	1.4948	no
ENSG00000226312	CFLAR-AS1	antisense	CFLAR antisense RNA 1	934.968	2.3129	8.2369e-05	0.0014133	8.7113	29.1179	1.585	no
ENSG00000065150	IPO5	protein_coding	importin 5	63177.8	2.3124	1.6745e-10	6.0798e-09	102.166	311.829	1.6035	no
ENSG00000107438	PDLIM1	protein_coding	PDZ and LIM domain 1	17074.9	2.3113	4.4142e-07	1.0782e-05	71.3574	241.081	1.7489	no
ENSG00000140931	CMTM3	protein_coding	CKLF like MARVEL transmembrane domain containing 3	9101.91	2.3111	3.8596e-09	1.2195e-07	31.5018	92.4968	1.4948	no
ENSG00000122861	PLAU	protein_coding	plasminogen activator, urokinase	9730.5	2.3079	4.3474e-05	0.00079558	22.5708	49.2527	1.0589	yes
ENSG00000166912	MTMR10	protein_coding	myotubularin related protein 10	7533.41	2.3064	8.1014e-11	3.0419e-09	9.5631	28.7324	1.4475	no
ENSG00000181264	TMEM136	protein_coding	TLC domain containing 5	3828.65	2.3045	3.3144e-10	1.1636e-08	7.1535	22.8246	1.585	no
ENSG00000244486	SCARF2	protein_coding	scavenger receptor class F member 2	15877.5	2.3015	1.9855e-06	4.5538e-05	29.8668	77.1294	1.3312	no
ENSG00000105856	HBP1	protein_coding	HMG-box transcription factor 1	4657.57	2.3003	3.0011e-08	8.4656e-07	9.8973	33.169	1.628	no
ENSG00000166002	SMCO4	protein_coding	single-pass membrane protein with coiled-coil domains 4	1240.65	2.2973	1.4813e-06	3.4345e-05	12.7954	41.6756	1.6189	no
ENSG00000105835	NAMPT	protein_coding	nicotinamide phosphoribosyltransferase	11857.9	2.2948	2.5576e-10	9.1083e-09	21.0514	66.8182	1.628	no
ENSG00000169891	REPS2	protein_coding	RALBP1 associated Eps domain containing 2	2185.56	2.292	4.6762e-07	1.1403e-05	2.0936	6.5851	1.415	yes
ENSG00000229847	EMX2OS	antisense	EMX2 opposite strand/antisense RNA	762.807	2.2875	1.978e-05	0.00038423	0.9926	3.1892	1	no
ENSG00000116717	GADD45A	protein_coding	growth arrest and DNA damage inducible alpha	16378.7	2.2871	5.1657e-06	0.00011102	75.931	251.71	1.7162	no
ENSG00000197312	DDI2	protein_coding	DNA damage inducible 1 homolog 2	8106.77	2.285	3.6332e-05	0.00067108	7.7172	18.7687	1.152	no
ENSG00000154781	CCDC174	protein_coding	coiled-coil domain containing 174	2914.98	2.2817	8.4956e-06	0.00017498	11.0684	39.1747	1.737	no
ENSG00000250337	LINC01021	lincRNA	p53 upregulated regulator of p53 levels	343.381	2.2792	7.1143e-05	0.0012386	2.6215	6.6317	1	yes
ENSG00000122971	ACADS	protein_coding	acyl-CoA dehydrogenase short chain	2155.09	2.279	7.107e-06	0.00014855	7.7431	20.4569	1.2224	no
ENSG00000168209	DDIT4	protein_coding	DNA damage inducible transcript 4	47379.6	2.279	1.1172e-07	2.9418e-06	179.24	495.582	1.4652	yes
ENSG00000090376	IRAK3	protein_coding	interleukin 1 receptor associated kinase 3	1939.03	2.2777	3.501e-07	8.658e-06	1.8854	5.3938	1	no
ENSG00000164122	ASB5	protein_coding	ankyrin repeat and SOCS box containing 5	438.706	2.2762	9.0131e-06	0.000185	1.418	4.4831	1.3219	no
ENSG00000130720	FIBCD1	protein_coding	fibrinogen C domain containing 1	358.521	2.2751	0.002532	0.029854	0.4864	2.1455	1.585	no
ENSG00000040933	INPP4A	protein_coding	inositol polyphosphate-4-phosphatase type I A	7592.67	2.2738	1.8798e-09	6.1693e-08	12.655	32.5064	1.2801	no
ENSG00000205133	TRIQK	protein_coding	triple QxxK/R motif containing	4585.18	2.2732	5.5435e-08	1.5091e-06	10.4123	35.8238	1.75	no
ENSG00000174332	GLIS1	protein_coding	GLIS family zinc finger 1	487.197	2.2732	4.9054e-06	0.00010573	0.8747	2.7037	1	no
ENSG00000168779	SHOX2	protein_coding	short stature homeobox 2	3230.78	2.2728	3.743e-07	9.2259e-06	5.5927	18.628	1.5146	no
ENSG00000251022	THAP9-AS1	antisense	THAP9 antisense RNA 1	7309	2.2716	1.4293e-10	5.2344e-09	30.985	84.9403	1.4263	no
ENSG00000169914	OTUD3	protein_coding	OTU deubiquitinase 3	2199.65	2.2682	2.6145e-05	0.00049714	4.8359	13.0568	1.2224	no
ENSG00000145687	SSBP2	protein_coding	single stranded DNA binding protein 2	6144.34	2.2673	1.746e-09	5.7428e-08	26.2057	79.6302	1.585	yes
ENSG00000176845	METRNL	protein_coding	meteorin like, glial cell differentiation regulator	1991.73	2.2663	1.5626e-06	3.6174e-05	8.4947	28.08	1.6881	no
ENSG00000143878	RHOB	protein_coding	ras homolog family member B	29788.9	2.263	3.1369e-05	0.00058855	74.1339	215.25	1.5261	no
ENSG00000213462	ERV3-1	protein_coding	endogenous retrovirus group 3 member 1, envelope	931.633	2.2618	0.00017359	0.0027468	5.2472	15.2745	1.415	yes
ENSG00000110628	SLC22A18	protein_coding	solute carrier family 22 member 18	742.914	2.2614	4.7691e-06	0.00010309	3.8212	10.8009	1.263	no
ENSG00000145623	OSMR	protein_coding	oncostatin M receptor	26384.7	2.2602	3.3689e-11	1.3063e-09	36.3906	112.765	1.6234	no
ENSG00000184557	SOCS3	protein_coding	suppressor of cytokine signaling 3	2660.16	2.2601	0.00011838	0.0019565	5.193	14.6664	1.415	yes
ENSG00000266709	RP11-214O1.2	lincRNA	uncharacterized protein MGC12916	559.763	2.2574	0.0039318	0.043396	2.237	6.2401	1.2224	no
ENSG00000121410	A1BG	protein_coding	alpha-1-B glycoprotein	1408.7	2.2558	1.2853e-05	0.00025881	25.8696	68.2595	1.3536	no
ENSG00000225880	LINC00115	lincRNA	long intergenic non-protein coding RNA 115	257.502	2.2539	0.00068899	0.0095047	1.327	3.8829	1.3219	no
ENSG00000151789	ZNF385D	protein_coding	zinc finger protein 385D	1498.05	2.2457	6.6019e-06	0.00013877	4.1683	15.3331	1.6781	no
ENSG00000168710	AHCYL1	protein_coding	adenosylhomocysteinase like 1	38809.1	2.2456	8.1283e-12	3.3624e-10	56.2326	165.866	1.5508	no
ENSG00000148175	STOM	protein_coding	stomatin	16963.8	2.2454	1.4982e-08	4.3884e-07	35.3229	108.436	1.5983	yes
ENSG00000173598	NUDT4	protein_coding	nudix hydrolase 4	25474	2.2448	2.9383e-10	1.034e-08	35.2472	106.216	1.5715	yes
ENSG00000234741	GAS5	processed_transcript	growth arrest specific 5	19423.6	2.2447	3.9523e-09	1.2448e-07	234.827	676.07	1.5204	no
ENSG00000143341	HMCN1	protein_coding	hemicentin 1	4565.95	2.2433	1.5779e-07	4.0787e-06	2.0302	7.3977	1.415	yes
ENSG00000100852	ARHGAP5	protein_coding	Rho GTPase activating protein 5	13595	2.2392	1.4834e-09	4.9338e-08	15.7301	47.941	1.5272	no
ENSG00000101955	SRPX	protein_coding	sushi repeat containing protein X-linked	48292.1	2.2321	5.6243e-09	1.7492e-07	159.406	456.57	1.5173	yes
ENSG00000260618	RP11-23N2.4	antisense	NA	214.094	2.2312	0.0054255	0.0568	3.1483	9.3028	1.3219	yes
ENSG00000177410	ZFAS1	antisense	ZNFX1 antisense RNA 1	12746.4	2.23	1.567e-09	5.1944e-08	134.315	390.578	1.5379	no
ENSG00000131791	PRKAB2	protein_coding	protein kinase AMP-activated non-catalytic subunit beta 2	11345	2.23	1.1189e-08	3.3365e-07	11.736	38.489	1.585	no
ENSG00000189266	PNRC2	protein_coding	proline rich nuclear receptor coactivator 2	18306.3	2.2297	1.4532e-08	4.2693e-07	49.0488	130.236	1.3896	no
ENSG00000142871	CYR61	protein_coding	cellular communication network factor 1	203601	2.2271	1.6309e-08	4.7488e-07	520.425	1497.73	1.5246	no
ENSG00000170271	FAXDC2	protein_coding	fatty acid hydroxylase domain containing 2	1909.16	2.225	3.5736e-08	1.0004e-06	5.6053	13.6292	1.0995	no
ENSG00000154654	NCAM2	protein_coding	neural cell adhesion molecule 2	3151.28	2.2237	6.2059e-08	1.6833e-06	3.2655	10.656	1.585	yes
ENSG00000113448	PDE4D	protein_coding	phosphodiesterase 4D	5451.79	2.2196	1.2909e-09	4.2984e-08	5.4031	17.2604	1.585	no
ENSG00000011638	TMEM159	protein_coding	transmembrane protein 159	2572.81	2.2134	2.2763e-06	5.1846e-05	12.958	35.1263	1.3626	no
ENSG00000109610	SOD3	protein_coding	superoxide dismutase 3	2729.16	2.2098	3.8601e-06	8.4612e-05	12.434	33.29	1.387	no
ENSG00000172465	TCEAL1	protein_coding	transcription elongation factor A like 1	5444.57	2.1993	3.8418e-07	9.4614e-06	34.131	105.121	1.5986	no
ENSG00000107984	DKK1	protein_coding	dickkopf WNT signaling pathway inhibitor 1	23896.5	2.1983	2.4901e-07	6.2729e-06	105.631	302.111	1.5017	no
ENSG00000198108	CHSY3	protein_coding	chondroitin sulfate synthase 3	11658.9	2.1936	2.461e-10	8.7854e-09	17.1779	50.3686	1.5025	no
ENSG00000111961	SASH1	protein_coding	SAM and SH3 domain containing 1	9819.89	2.1911	1.773e-05	0.00034805	11.967	34.5417	1.4695	no
ENSG00000189067	LITAF	protein_coding	lipopolysaccharide induced TNF factor	1786.41	2.1875	7.1806e-07	1.7247e-05	4.7019	13.4226	1.2224	no
ENSG00000133874	RNF122	protein_coding	ring finger protein 122	322.846	2.1849	0.0032324	0.03677	1.1545	2.8201	1	no
ENSG00000136732	GYPC	protein_coding	glycophorin C (Gerbich blood group)	3003.94	2.1824	2.2116e-06	5.0527e-05	19.6091	59.488	1.5146	yes
ENSG00000121068	TBX2	protein_coding	T-box transcription factor 2	4276.28	2.1817	9.8048e-06	0.00019987	6.4367	14.5969	1.1926	no
ENSG00000123096	SSPN	protein_coding	sarcospan	1810.44	2.1811	3.7217e-05	0.000687	2.5053	6.7919	1	yes
ENSG00000167487	KLHL26	protein_coding	kelch like family member 26	1833.19	2.1798	1.4345e-05	0.00028672	2.854	8.7202	1.3219	no
ENSG00000107796	ACTA2	protein_coding	actin alpha 2, smooth muscle	70570.3	2.1785	6.5807e-07	1.589e-05	347.513	875.848	1.3293	no
ENSG00000012660	ELOVL5	protein_coding	ELOVL fatty acid elongase 5	28667.5	2.1774	2.5027e-08	7.1404e-07	65.6894	177.091	1.4096	no
ENSG00000141401	IMPA2	protein_coding	inositol monophosphatase 2	9861.6	2.177	2.1388e-06	4.8941e-05	60.6622	154.643	1.3312	no
ENSG00000170160	CCDC144A	protein_coding	coiled-coil domain containing 144A	646.655	2.1769	0.00016431	0.0026167	1.1822	3.6922	1.3219	no
ENSG00000167996	FTH1	protein_coding	ferritin heavy chain 1	357473	2.1734	4.0234e-08	1.1095e-06	3171.79	8795.34	1.471	yes
ENSG00000198121	LPAR1	protein_coding	lysophosphatidic acid receptor 1	44729.1	2.1714	1.2056e-08	3.5773e-07	86.7449	251.239	1.5178	no
ENSG00000282849	RP11-121P12.1	lincRNA	NA	204.499	2.1705	0.00029913	0.0045099	2.7698	7.7166	1.1699	no
ENSG00000281484	BTG3	protein_coding	BTG anti-proliferation factor 3	386.263	2.1698	0.01044	0.0978	7.4962	21.1553	1.4594	no
ENSG00000132669	RIN2	protein_coding	Ras and Rab interactor 2	6052.19	2.1683	3.3929e-06	7.5091e-05	9.6433	26.8666	1.3479	no
ENSG00000122691	TWIST1	protein_coding	twist family bHLH transcription factor 1	8408.87	2.1661	0.00013573	0.0022113	38.9345	109.325	1.4594	no
ENSG00000145390	USP53	protein_coding	ubiquitin specific peptidase 53	23548.3	2.16	1.3504e-10	4.9639e-09	32.3613	81.4854	1.3132	yes
ENSG00000197635	DPP4	protein_coding	dipeptidyl peptidase 4	653.05	2.1531	0.00022166	0.0034326	1.0637	3.1412	1	no
ENSG00000278191	CARS	protein_coding	cysteinyl-tRNA synthetase 1	428.541	2.1505	0.0025303	0.029846	1.9315	6.7652	1.415	no
ENSG00000138463	DIRC2	protein_coding	solute carrier family 49 member 4	2006.62	2.1495	0.00020147	0.0031526	4.4206	13.4169	1.4854	no
ENSG00000131873	CHSY1	protein_coding	chondroitin sulfate synthase 1	19795.8	2.1449	8.0328e-08	2.1494e-06	23.9252	72.3464	1.546	no
ENSG00000273145	CITF22-92A6.1	lincRNA	NA	174.03	2.1438	0.0021795	0.026304	0.8832	2.5085	1	no
ENSG00000175938	ORAI3	protein_coding	ORAI calcium release-activated calcium modulator 3	2044.26	2.1438	1.9681e-05	0.00038256	6.6751	16.3281	1.0875	yes
ENSG00000127955	GNAI1	protein_coding	G protein subunit alpha i1	2933.85	2.1425	1.4212e-05	0.00028424	5.1223	15.0999	1.415	no
ENSG00000151726	ACSL1	protein_coding	acyl-CoA synthetase long chain family member 1	26430.4	2.1416	4.6395e-08	1.2712e-06	51.8801	145.828	1.4718	yes
ENSG00000130766	SESN2	protein_coding	sestrin 2	2037.48	2.1414	2.0632e-05	0.00039948	3.3538	10.022	1.4594	yes
ENSG00000162889	MAPKAPK2	protein_coding	MAPK activated protein kinase 2	21026.6	2.1403	2.4888e-07	6.2729e-06	45.2934	125.271	1.4537	no
ENSG00000248254	AC092597.3	antisense	NA	249.241	2.1388	0.0010204	0.013433	4.254	10.3973	1.1375	no
ENSG00000133083	DCLK1	protein_coding	doublecortin like kinase 1	379	2.1326	0.0010197	0.013431	0.9761	2.5676	1	no
ENSG00000118482	PHF3	protein_coding	PHD finger protein 3	10393.7	2.1301	7.1256e-08	1.917e-06	8.946	26.5829	1.4854	no
ENSG00000156171	DRAM2	protein_coding	DNA damage regulated autophagy modulator 2	5538.47	2.1287	3.5949e-07	8.8828e-06	30.3994	83.787	1.4552	no
ENSG00000233593	RP4-665J23.1	processed_transcript	long intergenic non-protein coding RNA 2609	226.384	2.1285	0.0017439	0.0218	1.5855	5.1554	1	no
ENSG00000010810	FYN	protein_coding	FYN proto-oncogene, Src family tyrosine kinase	9065.5	2.1247	6.5527e-09	2.0252e-07	40.4264	115.3	1.5004	no
ENSG00000258818	RNASE4	protein_coding	ribonuclease A family member 4	3007.38	2.1224	6.1974e-06	0.00013101	11.8907	30.5292	1.2996	no
ENSG00000225511	LINC00475	lincRNA	NA	364.974	2.121	0.001041	0.013633	6.9814	19.1587	1.3219	yes
ENSG00000127314	RAP1B	protein_coding	RAP1B, member of RAS oncogene family	40627.9	2.1195	1.9409e-07	4.9483e-06	167.692	472.061	1.4848	yes
ENSG00000115525	ST3GAL5	protein_coding	ST3 beta-galactoside alpha-2,3-sialyltransferase 5	1365.7	2.1195	1.2958e-05	0.00026057	6.5036	16.4382	1.0875	yes
ENSG00000151491	EPS8	protein_coding	epidermal growth factor receptor pathway substrate 8	6333.68	2.1145	3.3734e-05	0.00062817	43.7112	115.331	1.3661	yes
ENSG00000158850	B4GALT3	protein_coding	beta-1,4-galactosyltransferase 3	5958.73	2.113	2.0217e-05	0.00039246	23.8373	69.9319	1.5059	no
ENSG00000163393	SLC22A15	protein_coding	solute carrier family 22 member 15	2163.4	2.112	0.00010072	0.0016825	6.1328	15.4804	1.1926	yes
ENSG00000189227	C15orf61	protein_coding	chromosome 15 open reading frame 61	1303.18	2.111	5.0201e-05	0.00090529	3.7525	8.9918	1	no
ENSG00000072840	EVC	protein_coding	EvC ciliary complex subunit 1	11353.7	2.1096	5.314e-05	0.00095482	14.5684	44.9777	1.5236	no
ENSG00000273352	RP11-61L19.3	sense_intronic	NA	583.864	2.107	0.006345	0.0647	0.8636	2.5677	1	no
ENSG00000104343	UBE2W	protein_coding	ubiquitin conjugating enzyme E2 W	6239.24	2.1057	1.6479e-06	3.806e-05	10.528	28.3732	1.273	no
ENSG00000253846	PCDHGA10	protein_coding	protocadherin gamma subfamily A, 10	4504.65	2.1038	1.4742e-07	3.8307e-06	5.4803	14.7816	1.415	no
ENSG00000131016	AKAP12	protein_coding	A-kinase anchoring protein 12	28345.6	2.1033	1.8579e-07	4.7487e-06	21.274	62.5336	1.5406	no
ENSG00000113369	ARRDC3	protein_coding	arrestin domain containing 3	6329.37	2.1023	2.1171e-07	5.3837e-06	8.8602	23.7206	1.3219	no
ENSG00000206440	NFKBIL1	protein_coding	NFKB inhibitor like 1	437.601	2.1001	0.00040933	0.005942	2.1549	5.469	1	no
ENSG00000227565	NFKBIL1	protein_coding	NFKB inhibitor like 1	437.601	2.1001	0.00040933	0.005942	2.1549	5.469	1	no
ENSG00000234530	NFKBIL1	protein_coding	NFKB inhibitor like 1	437.601	2.1001	0.00040933	0.005942	2.1549	5.469	1	no
ENSG00000236196	NFKBIL1	protein_coding	NFKB inhibitor like 1	437.601	2.1001	0.00040933	0.005942	2.1549	5.469	1	no
ENSG00000236346	NFKBIL1	protein_coding	NFKB inhibitor like 1	437.601	2.1001	0.00040933	0.005942	2.1549	5.469	1	no
ENSG00000111275	ALDH2	protein_coding	aldehyde dehydrogenase 2 family member	2898.76	2.0999	2.633e-05	0.00050033	5.8746	14.6777	1.1926	no
ENSG00000110315	RNF141	protein_coding	ring finger protein 141	14310.4	2.0994	7.9934e-06	0.00016556	23.8986	64.3307	1.3785	no
ENSG00000186815	TPCN1	protein_coding	two pore segment channel 1	6246.86	2.0987	2.3931e-05	0.00045739	10.8425	33.5161	1.5443	no
ENSG00000113594	LIFR	protein_coding	LIF receptor subunit alpha	6947.05	2.0963	2.9746e-05	0.00055988	6.2112	12.632	1	yes
ENSG00000147852	VLDLR	protein_coding	very low density lipoprotein receptor	1081.28	2.0953	4.5052e-05	0.00082141	1.4769	4.3626	1.3219	yes
ENSG00000103175	WFDC1	protein_coding	WAP four-disulfide core domain 1	814.948	2.0948	1.5358e-05	0.00030511	2.773	6.8795	1	no
ENSG00000000971	CFH	protein_coding	complement factor H	44723.4	2.0925	4.5017e-08	1.2357e-06	75.9654	203.202	1.4056	yes
ENSG00000110013	SIAE	protein_coding	sialic acid acetylesterase	7434.5	2.0896	2.7133e-08	7.7265e-07	13.0211	35.4131	1.3626	yes
ENSG00000133687	TMTC1	protein_coding	transmembrane O-mannosyltransferase targeting cadherins 1	9236.69	2.089	2.5072e-08	7.1466e-07	8.7883	23.0815	1.263	no
ENSG00000114480	GBE1	protein_coding	1,4-alpha-glucan branching enzyme 1	21050.2	2.0819	2.8292e-07	7.0793e-06	51.3127	146.104	1.4992	yes
ENSG00000101460	MAP1LC3A	protein_coding	microtubule associated protein 1 light chain 3 alpha	2591.91	2.0814	8.6148e-05	0.0014705	22.7517	58.9626	1.3219	no
ENSG00000103978	TMEM87A	protein_coding	transmembrane protein 87A	11135.2	2.0768	4.1378e-07	1.0148e-05	29.67	80.9722	1.4034	no
ENSG00000177674	AGTRAP	protein_coding	angiotensin II receptor associated protein	4092.53	2.0767	3.7998e-05	0.00070098	27.0145	74.5394	1.4406	no
ENSG00000122335	SERAC1	protein_coding	serine active site containing 1	3516.86	2.0764	2.129e-05	0.00041115	4.4304	15.0065	1.6781	no
ENSG00000259345	RP11-624L4.1	lincRNA	NA	1310.34	2.0758	0.00012561	0.0020589	16.4978	33.4819	1	yes
ENSG00000236039	AC017060.1	lincRNA	long intergenic non-protein coding RNA 2889	182.651	2.0735	0.0047754	0.051	1.9104	4.7036	1	no
ENSG00000120549	KIAA1217	protein_coding	KIAA1217	9021.54	2.0685	3.1593e-05	0.00059239	14.5262	32.0547	1.0444	yes
ENSG00000059758	CDK17	protein_coding	cyclin dependent kinase 17	12915.3	2.0683	0.00024183	0.0037079	34.403	91.3376	1.3943	no
ENSG00000255529	POLR2M	protein_coding	RNA polymerase II subunit M	10465.7	2.0671	1.8812e-07	4.8043e-06	15.7399	40.1619	1.2701	no
ENSG00000183098	GPC6	protein_coding	glypican 6	9444.73	2.0653	1.4359e-08	4.2267e-07	7.5572	18.6618	1.152	yes
ENSG00000109846	CRYAB	protein_coding	crystallin alpha B	5765.99	2.0588	5.5378e-05	0.00098964	42.2733	111.415	1.3811	no
ENSG00000169372	CRADD	protein_coding	CASP2 and RIPK1 domain containing adaptor with death domain	1252.46	2.0584	1.0352e-05	0.00021088	8.8331	24.0123	1.3219	no
ENSG00000231312	AC007246.3	antisense	MAP4K3 divergent transcript	2504.85	2.057	2.2739e-06	5.1833e-05	24.1873	65.5787	1.4222	yes
ENSG00000173744	AGFG1	protein_coding	ArfGAP with FG repeats 1	16397.5	2.0559	1.8696e-06	4.2947e-05	41.5416	113.101	1.4066	no
ENSG00000118257	NRP2	protein_coding	neuropilin 2	19590.2	2.0549	1.6824e-07	4.3226e-06	27.2667	71.3561	1.3626	no
ENSG00000100284	TOM1	protein_coding	target of myb1 membrane trafficking protein	8031.57	2.0505	3.5845e-05	0.00066456	30.5795	73.8115	1.2288	no
ENSG00000065534	MYLK	protein_coding	myosin light chain kinase	34573	2.0473	1.8052e-06	4.1498e-05	40.7466	108.325	1.3759	yes
ENSG00000007255	TRAPPC6A	protein_coding	trafficking protein particle complex 6A	306.54	2.0464	0.0054342	0.0569	4.3393	9.1833	1	no
ENSG00000170921	TANC2	protein_coding	tetratricopeptide repeat, ankyrin repeat and coiled-coil containing 2	23811	2.0428	1.0198e-06	2.4172e-05	25.4586	69.3238	1.4288	no
ENSG00000243749	TMEM35B	protein_coding	transmembrane protein 35B	1988.72	2.0426	3.8165e-05	0.00070362	17.1227	43.3605	1.2895	no
ENSG00000049239	H6PD	protein_coding	hexose-6-phosphate dehydrogenase/glucose 1-dehydrogenase	52366.7	2.0423	1.5566e-07	4.0307e-06	31.5047	86.0139	1.3985	no
ENSG00000140511	HAPLN3	protein_coding	hyaluronan and proteoglycan link protein 3	4599.86	2.0416	3.4132e-06	7.5485e-05	16.5929	36.9889	1.078	no
ENSG00000206538	VGLL3	protein_coding	vestigial like family member 3	79041.2	2.0416	1.4587e-07	3.7939e-06	50.9538	124.663	1.2768	no
ENSG00000183655	KLHL25	protein_coding	kelch like family member 25	1601	2.041	1.8727e-05	0.00036665	2.1922	6.4635	1.2224	no
ENSG00000164713	BRI3	protein_coding	brain protein I3	9351.74	2.0388	2.4055e-06	5.4497e-05	103.792	274.718	1.3943	no
ENSG00000120837	NFYB	protein_coding	nuclear transcription factor Y subunit beta	4362.89	2.0371	2.8824e-07	7.2001e-06	11.7398	32.1974	1.344	yes
ENSG00000196781	TLE1	protein_coding	TLE family member 1, transcriptional corepressor	1292.34	2.0366	0.0002256	0.0034825	3.6651	8.8407	1	no
ENSG00000143772	ITPKB	protein_coding	inositol-trisphosphate 3-kinase B	2259.57	2.036	0.0027767	0.032304	2.3265	6.4685	1.2224	no
ENSG00000196470	SIAH1	protein_coding	siah E3 ubiquitin protein ligase 1	2857.7	2.0359	3.4811e-05	0.00064661	8.2188	23.584	1.4739	no
ENSG00000137478	FCHSD2	protein_coding	FCH and double SH3 domains 2	10171.6	2.0358	4.251e-07	1.0409e-05	16.2277	35.4739	1.0825	no
ENSG00000274334	VASN	protein_coding	vasorin	11757.2	2.0345	0.0037555	0.041693	29.849	63.3913	1.0458	no
ENSG00000180354	MTURN	protein_coding	maturin, neural progenitor differentiation regulator homolog	3020.24	2.0334	5.6745e-06	0.00012099	4.2333	11.4834	1.263	no
ENSG00000166289	PLEKHF1	protein_coding	pleckstrin homology and FYVE domain containing 1	1430.06	2.0315	0.00098279	0.012976	8.115	16.8998	1	yes
ENSG00000138686	BBS7	protein_coding	Bardet-Biedl syndrome 7	4933.89	2.0313	1.1693e-06	2.7542e-05	15.3493	42.6208	1.4594	no
ENSG00000196730	DAPK1	protein_coding	death associated protein kinase 1	1045.44	2.0304	0.010475	0.0981	1.1986	5.1024	1.585	yes
ENSG00000185432	METTL7A	protein_coding	methyltransferase like 7A	10567.7	2.0293	1.4143e-05	0.00028325	29.89	70.5352	1.2157	yes
ENSG00000123094	RASSF8	protein_coding	Ras association domain family member 8	19374.9	2.0275	4.2507e-07	1.0409e-05	29.2506	63.7035	1.1155	no
ENSG00000162733	DDR2	protein_coding	discoidin domain receptor tyrosine kinase 2	47101.1	2.0257	2.671e-07	6.6889e-06	27.1954	70.3445	1.3424	yes
ENSG00000225313	RP11-415J8.3	antisense	NA	2656.32	2.0247	2.4641e-06	5.5612e-05	30.4209	85.329	1.4721	no
ENSG00000237441	RGL2	protein_coding	ral guanine nucleotide dissociation stimulator like 2	1995.01	2.0232	7.3941e-05	0.0012828	5.0451	10.9029	1	no
ENSG00000034677	RNF19A	protein_coding	ring finger protein 19A, RBR E3 ubiquitin protein ligase	6760.1	2.0222	9.479e-07	2.2523e-05	12.5219	32.8152	1.2801	no
ENSG00000065802	ASB1	protein_coding	ankyrin repeat and SOCS box containing 1	14690.3	2.0201	5.8288e-06	0.00012383	23.1847	61.1552	1.3692	no
ENSG00000118816	CCNI	protein_coding	cyclin I	42030.5	2.0182	6.8821e-07	1.6551e-05	96.3751	248.571	1.3659	no
ENSG00000206560	ANKRD28	protein_coding	ankyrin repeat domain 28	22281.3	2.018	7.0798e-06	0.00014814	47.8502	106.403	1.1268	yes
ENSG00000245812	RP11-175K6.1	lincRNA	long intergenic non-protein coding RNA 2202	645.592	2.0173	0.00030161	0.0045404	9.9364	24.6456	1.241	yes
ENSG00000278270	RPS9	protein_coding	ribosomal protein S9	4396.62	2.0156	5.6634e-05	0.0010109	65.9928	169.218	1.3433	no
ENSG00000239268	RP11-384F7.2	lincRNA	NA	218.516	2.0155	0.0018935	0.023367	3.7624	11.1217	1.263	no
ENSG00000173482	PTPRM	protein_coding	protein tyrosine phosphatase receptor type M	26079.3	2.0141	3.7467e-08	1.0429e-06	35.8124	90.8768	1.3141	yes
ENSG00000196205	EEF1A1P5	processed_pseudogene	NA	686.862	2.0136	0.00024117	0.0037018	3.4842	7.4143	1	no
ENSG00000172183	ISG20	protein_coding	interferon stimulated exonuclease gene 20	411.177	2.0135	0.0094104	0.0899	2.9907	10.6925	1.585	no
ENSG00000166046	TCP11L2	protein_coding	t-complex 11 like 2	809.27	2.0086	0.0058439	0.0604	3.2052	8.394	1.1699	yes
ENSG00000169155	ZBTB43	protein_coding	zinc finger and BTB domain containing 43	4231.48	2.0077	5.7533e-06	0.00012241	5.0212	12.2595	1.1155	no
ENSG00000117597	DIEXF	protein_coding	UTP25 small subunit processor component	5271.9	2.0043	7.4753e-05	0.0012954	3.8381	10.7927	1.263	no
ENSG00000163110	PDLIM5	protein_coding	PDZ and LIM domain 5	49950	2.004	2.1507e-07	5.4597e-06	73.452	180.214	1.2904	no
ENSG00000205302	SNX2	protein_coding	sorting nexin 2	10462.1	2.0025	3.0342e-06	6.7605e-05	51.7183	129.191	1.2944	no
ENSG00000173812	EIF1	protein_coding	eukaryotic translation initiation factor 1	56929.6	1.9999	2.6791e-06	6.01e-05	442.644	1098.94	1.3089	no
ENSG00000125629	INSIG2	protein_coding	insulin induced gene 2	3823.15	1.9996	5.3615e-06	0.00011481	15.5508	39.934	1.2701	no
ENSG00000174437	ATP2A2	protein_coding	ATPase sarcoplasmic/endoplasmic reticulum Ca2+ transporting 2	69303	1.999	4.0836e-06	8.9247e-05	85.1549	234.846	1.4564	no
ENSG00000187091	PLCD1	protein_coding	phospholipase C delta 1	4217.07	1.9955	0.00036795	0.0054181	12.7843	28.0961	1.0506	no
ENSG00000165195	PIGA	protein_coding	phosphatidylinositol glycan anchor biosynthesis class A	1293.37	1.9929	0.00089957	0.011981	3.8038	9.4832	1	no
ENSG00000013619	MAMLD1	protein_coding	mastermind like domain containing 1	3585.87	1.9907	0.00026238	0.0039903	4.8664	13.1028	1.2224	no
ENSG00000137764	MAP2K5	protein_coding	mitogen-activated protein kinase kinase 5	2450.76	1.9887	3.8478e-06	8.4424e-05	8.3158	21.057	1.2895	no
ENSG00000102531	FNDC3A	protein_coding	fibronectin type III domain containing 3A	27663.2	1.9885	2.5836e-05	0.00049189	30.311	81.0458	1.4034	no
ENSG00000120708	TGFBI	protein_coding	transforming growth factor beta induced	220816	1.9873	7.5893e-06	0.00015752	527.157	1212.24	1.2	no
ENSG00000137124	ALDH1B1	protein_coding	aldehyde dehydrogenase 1 family member B1	24051.2	1.9871	0.00017259	0.0027354	54.7446	129.368	1.215	no
ENSG00000144747	TMF1	protein_coding	TATA element modulatory factor 1	13051.6	1.9857	0.0035133	0.039361	28.4822	94.6534	1.727	no
ENSG00000170145	SIK2	protein_coding	salt inducible kinase 2	15040.8	1.9856	4.6708e-07	1.1399e-05	9.4245	26.096	1.433	no
ENSG00000168264	IRF2BP2	protein_coding	interferon regulatory factor 2 binding protein 2	20114.4	1.9852	1.607e-06	3.7143e-05	34.6076	90.608	1.3536	no
ENSG00000235027	AC068580.6	antisense	NA	344.433	1.9839	0.010249	0.0964	0.9598	2.9907	1	no
ENSG00000144645	OSBPL10	protein_coding	oxysterol binding protein like 10	5994.94	1.9815	0.00038352	0.0056308	12.1563	28.6095	1.2065	no
ENSG00000143891	GALM	protein_coding	galactose mutarotase	1720.98	1.9805	9.1484e-05	0.0015509	7.3431	19.1937	1.3219	no
ENSG00000198933	TBKBP1	protein_coding	TBK1 binding protein 1	3408.25	1.9796	2.7587e-05	0.00052321	10.9971	30.0928	1.3692	no
ENSG00000157224	CLDN12	protein_coding	claudin 12	7127.08	1.9795	6.6588e-06	0.00013987	18.7794	46.4878	1.2327	no
ENSG00000111711	GOLT1B	protein_coding	golgi transport 1B	19066.1	1.977	8.4164e-06	0.00017347	56.1153	134.398	1.2439	no
ENSG00000112406	HECA	protein_coding	hdc homolog, cell cycle regulator	4359.16	1.9764	2.2254e-05	0.00042837	4.3239	11.7199	1.3785	no
ENSG00000121440	PDZRN3	protein_coding	PDZ domain containing ring finger 3	5064.96	1.9731	2.6657e-06	5.9845e-05	9.9117	24.3205	1.1844	no
ENSG00000137575	SDCBP	protein_coding	syndecan binding protein	28791.8	1.9712	3.2358e-05	0.00060521	92.8109	244.587	1.3879	no
ENSG00000132471	WBP2	protein_coding	WW domain binding protein 2	6881.34	1.9709	0.00024934	0.0038115	29.2258	74.6991	1.341	no
ENSG00000172340	SUCLG2	protein_coding	succinate-CoA ligase GDP-forming subunit beta	19354.5	1.9688	3.7538e-06	8.2586e-05	52.2585	137.286	1.3806	no
ENSG00000204634	TBC1D8	protein_coding	TBC1 domain family member 8	1395.34	1.9672	0.0014857	0.018833	4.5551	12.9241	1.2224	no
ENSG00000283396	AC127070.1	protein_coding	NA	1002.43	1.967	0.0068497	0.069	1.3164	3.5118	1.3219	no
ENSG00000118960	HS1BP3	protein_coding	HCLS1 binding protein 3	3635.09	1.9617	7.8418e-05	0.001351	10.5575	24.5051	1.1155	no
ENSG00000085117	CD82	protein_coding	CD82 molecule	16217.7	1.9613	4.8051e-06	0.00010364	67.8686	170.726	1.3177	yes
ENSG00000051108	HERPUD1	protein_coding	homocysteine inducible ER protein with ubiquitin like domain 1	24909.1	1.9611	7.4203e-06	0.00015433	126.625	303.503	1.2527	no
ENSG00000133112	TPT1	protein_coding	tumor protein, translationally-controlled 1	312805	1.9585	2.2642e-05	0.00043553	2221.4	5397.15	1.2806	no
ENSG00000089289	IGBP1	protein_coding	immunoglobulin binding protein 1	6675.18	1.9555	6.7829e-06	0.00014237	26.8882	62.5682	1.1926	no
ENSG00000241399	CD302	protein_coding	CD302 molecule	3582.73	1.9554	1.4518e-05	0.00028998	5.0714	14.2328	1.3219	yes
ENSG00000185862	EVI2B	protein_coding	ecotropic viral integration site 2B	668.789	1.9483	0.00012068	0.0019857	2.4478	5.7521	1.2224	yes
ENSG00000112655	PTK7	protein_coding	protein tyrosine kinase 7 (inactive)	23327	1.9482	5.9107e-07	1.4331e-05	42.157	100.672	1.2462	no
ENSG00000164331	ANKRA2	protein_coding	ankyrin repeat family A member 2	2313.51	1.9475	5.8679e-06	0.00012458	19.1463	45.5601	1.2327	no
ENSG00000185022	MAFF	protein_coding	MAF bZIP transcription factor F	3189.97	1.9475	0.00041915	0.0060639	8.0844	20.5318	1.2895	no
ENSG00000120254	MTHFD1L	protein_coding	methylenetetrahydrofolate dehydrogenase (NADP+ dependent) 1 like	11696.9	1.9452	0.00016292	0.0025988	40.7744	108.459	1.3759	no
ENSG00000090621	PABPC4	protein_coding	poly(A) binding protein cytoplasmic 4	48319	1.9446	0.00022679	0.0034992	141.639	347.632	1.2872	no
ENSG00000100600	LGMN	protein_coding	legumain	3419.88	1.9422	0.0001005	0.0016798	13.675	29.7504	1.0473	no
ENSG00000115414	FN1	protein_coding	fibronectin 1	1.32829e+07	1.9399	1.1285e-07	2.9687e-06	14595	33422.9	1.1953	no
ENSG00000233608	TWIST2	protein_coding	twist family bHLH transcription factor 2	3976.13	1.9398	0.00011649	0.0019294	23.4121	53.7695	1.1964	no
ENSG00000243244	STON1	protein_coding	stonin 1	8974.44	1.9374	1.5998e-05	0.00031741	10.276	25.5987	1.2955	yes
ENSG00000178607	ERN1	protein_coding	endoplasmic reticulum to nucleus signaling 1	3125.63	1.9328	0.0030315	0.034804	7.1379	15.5662	1.0875	no
ENSG00000125775	SDCBP2	protein_coding	syndecan binding protein 2	308.003	1.9326	0.0095945	0.0913	1.9496	5.3933	1	no
ENSG00000197496	SLC2A10	protein_coding	solute carrier family 2 member 10	16685.6	1.9303	1.0937e-06	2.5864e-05	26.4202	64.3821	1.2675	no
ENSG00000114784	EIF1B	protein_coding	eukaryotic translation initiation factor 1B	4686.13	1.9295	0.00015212	0.0024502	39.1428	99.4989	1.3219	no
ENSG00000197746	PSAP	protein_coding	prosaposin	102382	1.9293	2.2632e-06	5.1668e-05	339.647	797.939	1.2284	no
ENSG00000107560	RAB11FIP2	protein_coding	RAB11 family interacting protein 2	6281.41	1.9287	4.9595e-05	0.00089601	5.9945	15.8453	1.2801	no
ENSG00000048392	RRM2B	protein_coding	ribonucleotide reductase regulatory TP53 inducible subunit M2B	11120.5	1.928	8.1584e-06	0.00016851	16.4938	39.6952	1.2701	yes
ENSG00000176531	PHLDB3	protein_coding	pleckstrin homology like domain family B member 3	1191.34	1.9279	0.00032157	0.004814	7.3496	16.3302	1.0875	no
ENSG00000134759	ELP2	protein_coding	elongator acetyltransferase complex subunit 2	14371.2	1.9271	7.6034e-05	0.0013152	66.4645	160.217	1.2648	no
ENSG00000107249	GLIS3	protein_coding	GLIS family zinc finger 3	3252.07	1.9265	3.2818e-05	0.00061297	4.6416	11.1891	1	no
ENSG00000210196	MT-TP	Mt_tRNA	NA	2973.77	1.9264	0.0015526	0.019597	480.428	1246.97	1.3755	no
ENSG00000257923	CUX1	protein_coding	cut like homeobox 1	10201.4	1.9255	4.0532e-07	9.9492e-06	17.5909	40.2358	1.1096	no
ENSG00000168958	MFF	protein_coding	mitochondrial fission factor	13127.6	1.9243	1.2172e-05	0.0002456	68.7351	156.932	1.1745	no
ENSG00000128016	ZFP36	protein_coding	ZFP36 ring finger protein	12112.9	1.9242	1.6549e-05	0.00032746	57.3593	145.101	1.3318	no
ENSG00000111276	CDKN1B	protein_coding	cyclin dependent kinase inhibitor 1B	3894.53	1.9218	0.00016033	0.0025651	10.6947	27.0161	1.2224	no
ENSG00000143437	ARNT	protein_coding	aryl hydrocarbon receptor nuclear translocator	14091.1	1.9186	3.5867e-05	0.00066456	30.6645	85.5707	1.4429	no
ENSG00000164136	IL15	protein_coding	interleukin 15	1104.74	1.9155	0.00012315	0.0020208	3.7443	9.0241	1	no
ENSG00000100596	SPTLC2	protein_coding	serine palmitoyltransferase long chain base subunit 2	11734.8	1.9132	0.0022673	0.027196	16.1797	43.6543	1.4044	no
ENSG00000162944	RFTN2	protein_coding	raftlin family member 2	1494.9	1.9118	0.00030191	0.0045426	2.6054	7.0199	1	yes
ENSG00000132824	SERINC3	protein_coding	serine incorporator 3	34588.1	1.9107	7.8235e-06	0.00016215	55.6961	134.242	1.2439	no
ENSG00000260912	RP11-363E7.4	sense_overlapping	NA	443.618	1.9086	0.0017512	0.021864	1.4795	3.7122	1.3219	yes
ENSG00000155975	VPS37A	protein_coding	VPS37A subunit of ESCRT-I	8497.49	1.9051	9.9602e-05	0.0016676	31.619	75.6262	1.2224	no
ENSG00000162032	SPSB3	protein_coding	splA/ryanodine receptor domain and SOCS box containing 3	2511.76	1.9048	0.0010956	0.014273	12.814	30.7614	1.1926	no
ENSG00000181788	SIAH2	protein_coding	siah E3 ubiquitin protein ligase 2	4432.61	1.9029	0.00018818	0.0029603	13.6188	31.175	1.0931	no
ENSG00000112893	MAN2A1	protein_coding	mannosidase alpha class 2A member 1	17378	1.8974	5.6906e-06	0.00012123	24.4569	55.8509	1.189	no
ENSG00000165617	DACT1	protein_coding	dishevelled binding antagonist of beta catenin 1	1552.89	1.897	0.0063555	0.0648	2.9945	8.4027	1.1699	no
ENSG00000134769	DTNA	protein_coding	dystrobrevin alpha	450.091	1.8969	0.00036001	0.0053198	1.3387	3.1744	1	yes
ENSG00000152409	JMY	protein_coding	junction mediating and regulatory protein, p53 cofactor	4592.61	1.8939	4.7675e-05	0.00086551	3.1658	7.1602	1	no
ENSG00000103145	HCFC1R1	protein_coding	host cell factor C1 regulator 1	1958.02	1.8937	0.00014447	0.0023421	24.0813	57.0676	1.2141	no
ENSG00000119139	TJP2	protein_coding	tight junction protein 2	2821.95	1.8922	0.0001241	0.0020353	5.0848	11.0558	1	no
ENSG00000166979	EVA1C	protein_coding	eva-1 homolog C	1380.05	1.892	0.00024028	0.00369	6.7701	16.2227	1.0875	no
ENSG00000096717	SIRT1	protein_coding	sirtuin 1	4287.67	1.8903	8.1286e-06	0.00016801	7.3141	15.9787	1.0875	no
ENSG00000111199	TRPV4	protein_coding	transient receptor potential cation channel subfamily V member 4	639.352	1.8902	0.0014116	0.017963	1.3593	3.504	1.3219	no
ENSG00000089123	TASP1	protein_coding	taspase 1	2052.37	1.8884	0.00011604	0.0019232	6.8639	18.2652	1.2479	no
ENSG00000198742	SMURF1	protein_coding	SMAD specific E3 ubiquitin protein ligase 1	3890.15	1.8883	5.515e-05	0.00098735	4.643	11.2172	1	no
ENSG00000153071	DAB2	protein_coding	DAB adaptor protein 2	31408.4	1.8882	1.9474e-05	0.00037927	64.4083	158.707	1.2996	no
ENSG00000073331	ALPK1	protein_coding	alpha kinase 1	1366.14	1.8879	0.00012171	0.0019995	6.0719	14.105	1.0995	no
ENSG00000138433	CIR1	protein_coding	corepressor interacting with RBPJ, CIR1	3887.87	1.887	0.00041076	0.0059599	15.1473	38.8442	1.3219	no
ENSG00000157741	UBN2	protein_coding	ubinuclein 2	4601.72	1.8842	0.00024191	0.0037079	3.3793	6.5202	1	no
ENSG00000117305	HMGCL	protein_coding	3-hydroxy-3-methylglutaryl-CoA lyase	4516.5	1.8823	6.25e-05	0.001105	22.7189	49.2796	1.0589	no
ENSG00000087245	MMP2	protein_coding	matrix metallopeptidase 2	225352	1.8732	5.3435e-05	0.00095838	486.052	1085.97	1.1584	no
ENSG00000136960	ENPP2	protein_coding	ectonucleotide pyrophosphatase/phosphodiesterase 2	6986.76	1.8726	1.8385e-05	0.00036043	17.5957	39.1189	1.074	no
ENSG00000125962	ARMCX5	protein_coding	armadillo repeat containing X-linked 5	1669.68	1.8724	0.00023722	0.0036468	4.2813	9.8503	1.1375	no
ENSG00000119048	UBE2B	protein_coding	ubiquitin conjugating enzyme E2 B	6692.96	1.8723	0.00057083	0.0079973	57.6209	144.924	1.3072	no
ENSG00000003436	TFPI	protein_coding	tissue factor pathway inhibitor	15289	1.8694	0.00073994	0.010114	49.3587	128.139	1.3674	yes
ENSG00000104064	GABPB1	protein_coding	GA binding protein transcription factor subunit beta 1	4595.01	1.8691	5.1486e-05	0.00092734	16.1232	37.2048	1.1605	no
ENSG00000068024	HDAC4	protein_coding	histone deacetylase 4	3556.73	1.8679	3.6065e-05	0.00066657	10.003	21.4839	1	no
ENSG00000163512	AZI2	protein_coding	5-azacytidine induced 2	12761.7	1.8654	1.7925e-05	0.00035165	56.9043	137.972	1.261	no
ENSG00000168026	TTC21A	protein_coding	tetratricopeptide repeat domain 21A	560.972	1.8648	0.0003485	0.0051754	2.4412	5.8716	1.2224	no
ENSG00000147403	RPL10	protein_coding	ribosomal protein L10	123576	1.8642	0.00042499	0.0061394	1795.2	4175.07	1.2173	no
ENSG00000143382	ADAMTSL4	protein_coding	ADAMTS like 4	14795.1	1.863	3.2302e-05	0.00060453	27.9731	72.1114	1.3318	no
ENSG00000187231	SESTD1	protein_coding	SEC14 and spectrin domain containing 1	12325.5	1.8588	0.00018856	0.0029648	24.5826	62.7545	1.2996	no
ENSG00000162413	KLHL21	protein_coding	kelch like family member 21	10518.5	1.8533	3.3527e-05	0.00062471	14.2548	34.1616	1.2224	no
ENSG00000180667	YOD1	protein_coding	YOD1 deubiquitinase	2648.3	1.8529	0.0050478	0.0535	2.7613	6.707	1	no
ENSG00000144724	PTPRG	protein_coding	protein tyrosine phosphatase receptor type G	32077.5	1.8496	3.3768e-06	7.479e-05	28.0977	59.4531	1.0489	yes
ENSG00000222112	RN7SKP16	misc_RNA	RN7SK pseudogene 16	390.378	1.8477	0.0038227	0.042333	28.0754	63.1756	1.142	no
ENSG00000274950	RPS9	protein_coding	ribosomal protein S9	9563.1	1.8471	0.00038548	0.0056539	140.422	336.833	1.2613	no
ENSG00000137959	IFI44L	protein_coding	interferon induced protein 44 like	5297.47	1.8461	0.00022549	0.0034825	12.4227	28.8538	1.2065	no
ENSG00000172594	SMPDL3A	protein_coding	sphingomyelin phosphodiesterase acid like 3A	1510.4	1.8457	0.0032472	0.036881	6.0358	14.9944	1.1926	no
ENSG00000154079	SDHAF4	protein_coding	succinate dehydrogenase complex assembly factor 4	1122.25	1.8417	0.001132	0.01472	7.7012	20.7901	1.2895	no
ENSG00000136379	ABHD17C	protein_coding	abhydrolase domain containing 17C, depalmitoylase	2390.75	1.8386	0.00085763	0.011536	7.565	18.4909	1.078	no
ENSG00000049449	RCN1	protein_coding	reticulocalbin 1	95942	1.8384	5.8308e-05	0.0010383	247.833	591.005	1.2495	yes
ENSG00000132821	VSTM2L	protein_coding	V-set and transmembrane domain containing 2 like	450.562	1.8373	0.0081474	0.0799	2.2566	4.7578	1	no
ENSG00000156508	EEF1A1	protein_coding	eukaryotic translation elongation factor 1 alpha 1	1.41345e+06	1.8355	0.00015265	0.002456	4338.11	10266.7	1.2427	no
ENSG00000220205	VAMP2	protein_coding	vesicle associated membrane protein 2	6410.77	1.8352	5.9475e-05	0.0010571	24.3386	56.3586	1.189	no
ENSG00000231500	RPS18	protein_coding	ribosomal protein S18	163176	1.8351	0.00033283	0.0049625	3339.13	7635.26	1.193	no
ENSG00000145425	RPS3A	protein_coding	ribosomal protein S3A	160734	1.8348	0.00051973	0.0073612	1590.87	3536.6	1.1521	no
ENSG00000114742	WDR48	protein_coding	WD repeat domain 48	4315.08	1.834	0.0013045	0.01675	11.5496	28.054	1.1575	no
ENSG00000165861	ZFYVE1	protein_coding	zinc finger FYVE-type containing 1	4306.13	1.8331	0.001221	0.015753	8.23	18.5716	1.152	no
ENSG00000088280	ASAP3	protein_coding	ArfGAP with SH3 domain, ankyrin repeat and PH domain 3	2807.63	1.8311	0.00015188	0.0024476	8.2579	17.3294	1	yes
ENSG00000282854	ASAP3	protein_coding	ArfGAP with SH3 domain, ankyrin repeat and PH domain 3	2807.63	1.8311	0.00015188	0.0024476	8.2579	17.3294	1	yes
ENSG00000171444	MCC	protein_coding	MCC regulator of WNT signaling pathway	3941.21	1.8277	3.2835e-05	0.00061297	4.0174	8.8319	1	yes
ENSG00000124762	CDKN1A	protein_coding	cyclin dependent kinase inhibitor 1A	47780.7	1.8257	0.00049372	0.0070162	193.501	397.44	1.0293	no
ENSG00000245060	LINC00847	lincRNA	long intergenic non-protein coding RNA 847	1099.83	1.8235	0.00029081	0.004389	5.138	11.3881	1	no
ENSG00000164647	STEAP1	protein_coding	STEAP family member 1	10044.7	1.8224	8.8872e-05	0.0015118	69.0605	148.259	1.0899	no
ENSG00000261189	RP3-512B11.3	antisense	NA	527.727	1.822	0.0019547	0.023991	5.2371	11.871	1.1155	no
ENSG00000142046	TMEM91	protein_coding	transmembrane protein 91	605.686	1.8219	0.00524	0.0552	4.9269	11.3179	1	no
ENSG00000089775	ZBTB25	protein_coding	zinc finger and BTB domain containing 25	3213.46	1.8215	6.3459e-05	0.0011206	4.8975	11.6497	1.1155	no
ENSG00000168303	MPLKIP	protein_coding	M-phase specific PLK1 interacting protein	6228.1	1.8198	0.00033006	0.0049312	5.0543	11.7184	1.1155	no
ENSG00000196937	FAM3C	protein_coding	FAM3 metabolism regulating signaling molecule C	21414.8	1.8172	0.00013412	0.0021875	65.093	159.941	1.2865	no
ENSG00000145675	PIK3R1	protein_coding	phosphoinositide-3-kinase regulatory subunit 1	11724.8	1.8155	0.00042309	0.006115	16.3027	35.1056	1.0825	yes
ENSG00000108389	MTMR4	protein_coding	myotubularin related protein 4	8943.35	1.8144	0.00025544	0.0038926	16.5921	38.9298	1.152	no
ENSG00000156671	SAMD8	protein_coding	sterile alpha motif domain containing 8	10392	1.8144	0.0019114	0.023526	9.2991	21.9125	1.2016	no
ENSG00000112200	ZNF451	protein_coding	zinc finger protein 451	8085.43	1.8102	8.7457e-05	0.0014894	18.4111	37.3645	1	no
ENSG00000114423	CBLB	protein_coding	Cbl proto-oncogene B	3803.09	1.8082	0.00089746	0.011966	6.9777	17.0747	1.1699	no
ENSG00000121104	FAM117A	protein_coding	family with sequence similarity 117 member A	555.08	1.806	0.0086705	0.0839	2.165	5.6781	1.2224	no
ENSG00000167377	ZNF23	protein_coding	zinc finger protein 23	2268.42	1.8051	0.00018921	0.0029734	7.0208	15.1354	1	no
ENSG00000170275	CRTAP	protein_coding	cartilage associated protein	44014	1.8016	0.0002244	0.0034695	187.435	402.396	1.1	no
ENSG00000080371	RAB21	protein_coding	RAB21, member RAS oncogene family	9481.97	1.8008	0.00039364	0.0057509	23.7123	51.6791	1.0841	no
ENSG00000109475	RPL34	protein_coding	ribosomal protein L34	39840.6	1.8003	0.00052938	0.0074587	1329.49	2816.83	1.0832	no
ENSG00000168003	SLC3A2	protein_coding	solute carrier family 3 member 2	12813.2	1.7997	0.00033226	0.004959	60.5972	140.931	1.1956	no
ENSG00000137876	RSL24D1	protein_coding	ribosomal L24 domain containing 1	11154.3	1.7961	0.00033337	0.0049681	44.4827	91.1423	1.0317	no
ENSG00000134909	ARHGAP32	protein_coding	Rho GTPase activating protein 32	3689.41	1.7945	0.00049158	0.0069925	3.9102	9.1621	1	no
ENSG00000274005	AC012314.2	protein_coding	ribosomal protein S9	8785.92	1.7934	0.00088244	0.011798	137.51	306.168	1.1432	no
ENSG00000274626	AC012314.4	protein_coding	ribosomal protein S9	8785.92	1.7934	0.00088244	0.011798	137.51	306.168	1.1432	no
ENSG00000275323	AC012314.5	protein_coding	ribosomal protein S9	8785.92	1.7934	0.00088244	0.011798	137.51	306.168	1.1432	no
ENSG00000277079	AC012314.11	protein_coding	ribosomal protein S9	8785.92	1.7934	0.00088244	0.011798	137.51	306.168	1.1432	no
ENSG00000277359	AC012314.12	protein_coding	ribosomal protein S9	8785.92	1.7934	0.00088244	0.011798	137.51	306.168	1.1432	no
ENSG00000278081	AC012314.14	protein_coding	ribosomal protein S9	8785.92	1.7934	0.00088244	0.011798	137.51	306.168	1.1432	no
ENSG00000176142	TMEM39A	protein_coding	transmembrane protein 39A	8785.31	1.7931	0.00019305	0.0030289	38.7856	87.6435	1.1538	no
ENSG00000156482	RPL30	protein_coding	ribosomal protein L30	55978.7	1.7922	0.00057733	0.0080761	1466.55	3198.98	1.1242	no
ENSG00000226328	NUP50-AS1	lincRNA	NUP50 divergent transcript	1397.27	1.7904	0.0020221	0.024696	9.5688	20.5506	1	no
ENSG00000162407	PLPP3	protein_coding	phospholipid phosphatase 3	43640.3	1.7886	7.0178e-05	0.0012238	93.1535	197.563	1.082	no
ENSG00000149380	P4HA3	protein_coding	prolyl 4-hydroxylase subunit alpha 3	8686.99	1.7884	0.0001023	0.0017069	29.1146	61.6776	1.0704	no
ENSG00000275074	NUDT18	protein_coding	nudix hydrolase 18	1484.05	1.7881	0.0044676	0.048199	7.4557	14.9433	1	no
ENSG00000101654	RNMT	protein_coding	RNA guanine-7 methyltransferase	5020.8	1.7856	0.00016038	0.0025651	7.6512	16.8502	1	no
ENSG00000166037	CEP57	protein_coding	centrosomal protein 57	5103.56	1.784	0.00066059	0.0091427	12.7265	28.141	1.0506	no
ENSG00000168679	SLC16A4	protein_coding	solute carrier family 16 member 4	2931.94	1.7839	0.00016494	0.0026225	9.2704	19.7099	1.0704	no
ENSG00000111897	SERINC1	protein_coding	serine incorporator 1	43219.8	1.7815	0.00016322	0.0026021	92.4967	199.436	1.1047	no
ENSG00000164330	EBF1	protein_coding	EBF transcription factor 1	4719.09	1.7779	0.00067962	0.0093842	7.9112	16.9178	1	yes
ENSG00000158716	DUSP23	protein_coding	dual specificity phosphatase 23	12603.6	1.7776	0.0091528	0.0879	183.022	368.72	1.0078	no
ENSG00000133247	KMT5C	protein_coding	lysine methyltransferase 5C	1123.53	1.7773	0.0089993	0.0865	7.7091	18.4843	1.078	no
ENSG00000270580	PKD1P6-NPIPP1	processed_transcript	PKD1P6-NPIPP1 readthrough	538.985	1.7771	0.0030738	0.035208	2.4176	4.9403	1	no
ENSG00000141034	GID4	protein_coding	GID complex subunit 4 homolog	3070.82	1.777	0.00038921	0.0056945	5.4465	11.6917	1.1155	no
ENSG00000168300	PCMTD1	protein_coding	protein-L-isoaspartate (D-aspartate) O-methyltransferase domain containing 1	4608.7	1.7769	0.0024878	0.029438	9.766	24.1182	1.1844	yes
ENSG00000273673	RPL9P9	transcribed_processed_pseudogene	NA	103525	1.7714	0.0013619	0.017398	1445.7	3096.76	1.0983	no
ENSG00000047936	ROS1	protein_coding	ROS proto-oncogene 1, receptor tyrosine kinase	2099.58	1.7712	0.0002228	0.0034483	2.3979	5.1386	1	yes
ENSG00000108946	PRKAR1A	protein_coding	protein kinase cAMP-dependent type I regulatory subunit alpha	53386.5	1.7682	0.00057969	0.0080985	153.646	347.8	1.171	no
ENSG00000148090	AUH	protein_coding	AU RNA binding methylglutaconyl-CoA hydratase	1530.05	1.768	0.0018937	0.023367	8.6182	19.1876	1	no
ENSG00000167202	TBC1D2B	protein_coding	TBC1 domain family member 2B	13116.3	1.7667	0.00022919	0.0035326	23.5945	51.7433	1.0841	no
ENSG00000154217	PITPNC1	protein_coding	phosphatidylinositol transfer protein cytoplasmic 1	2936.68	1.7642	0.0057892	0.06	5.7588	14.7856	1.1926	no
ENSG00000069702	TGFBR3	protein_coding	transforming growth factor beta receptor 3	6219.82	1.7636	0.0030273	0.034769	8.2893	18.6196	1.152	yes
ENSG00000198189	HSD17B11	protein_coding	hydroxysteroid 17-beta dehydrogenase 11	3710.97	1.7634	0.00038433	0.0056397	15.9222	35.5976	1.122	no
ENSG00000103888	CEMIP	protein_coding	cell migration inducing hyaluronidase 1	73297.9	1.7632	8.6307e-05	0.0014724	62.8423	143.436	1.1699	yes
ENSG00000008952	SEC62	protein_coding	SEC62 homolog, preprotein translocation factor	24193.4	1.7622	0.00098298	0.012976	52.2324	116.462	1.1424	no
ENSG00000179134	SAMD4B	protein_coding	sterile alpha motif domain containing 4B	12505.9	1.7617	0.0012424	0.016009	61.4667	138.615	1.1751	no
ENSG00000226742	HSBP1L1	protein_coding	heat shock factor binding protein 1 like 1	1406.91	1.7572	0.00051096	0.0072405	18.6093	40.0604	1.0356	no
ENSG00000160584	SIK3	protein_coding	SIK family kinase 3	5692.69	1.7549	0.0093807	0.0897	12.5617	31.1679	1.1926	no
ENSG00000163681	SLMAP	protein_coding	sarcolemma associated protein	10284.1	1.7548	4.8169e-05	0.00087288	26.989	55.9191	1.0255	no
ENSG00000166575	TMEM135	protein_coding	transmembrane protein 135	3940.88	1.7537	0.00046387	0.006627	9.2853	18.7409	1	no
ENSG00000134108	ARL8B	protein_coding	ADP ribosylation factor like GTPase 8B	12969.5	1.7534	0.0014951	0.018928	33.848	76.692	1.1561	no
ENSG00000061987	MON2	protein_coding	MON2 homolog, regulator of endosome-to-Golgi trafficking	8917.28	1.7506	0.00011664	0.00193	29.5768	60.5879	1	no
ENSG00000143418	CERS2	protein_coding	ceramide synthase 2	24907.2	1.7488	0.000785	0.010676	91.0048	194.299	1.0838	no
ENSG00000175061	LRRC75A-AS1	processed_transcript	small nucleolar RNA host gene 29	47094.2	1.7487	0.00088753	0.011858	494.466	1054.24	1.0917	no
ENSG00000175183	CSRP2	protein_coding	cysteine and glycine rich protein 2	1779.29	1.747	0.0078521	0.0774	16.2821	35.4568	1.0825	no
ENSG00000115935	WIPF1	protein_coding	WAS/WASL interacting protein family member 1	20197.1	1.7453	0.0015947	0.02007	44.6642	105.822	1.2179	no
ENSG00000181458	TMEM45A	protein_coding	transmembrane protein 45A	6400.16	1.7445	0.00033964	0.0050539	28.8128	64.5178	1.1375	no
ENSG00000148339	SLC25A25	protein_coding	solute carrier family 25 member 25	2749.57	1.7419	0.0095205	0.0908	6.1011	14.5325	1.1926	no
ENSG00000113657	DPYSL3	protein_coding	dihydropyrimidinase like 3	33321.9	1.7394	0.00076289	0.010399	46.7254	104.725	1.143	no
ENSG00000115226	FNDC4	protein_coding	fibronectin type III domain containing 4	3661.56	1.7388	0.0022487	0.027029	18.1035	38.5464	1.074	no
ENSG00000130340	SNX9	protein_coding	sorting nexin 9	8191.93	1.7358	0.00037547	0.0055208	14.155	28.7229	1	no
ENSG00000197442	MAP3K5	protein_coding	mitogen-activated protein kinase kinase kinase 5	9519.34	1.73	9.1913e-05	0.0015564	12.4984	27.6948	1.1575	yes
ENSG00000182534	MXRA7	protein_coding	matrix remodeling associated 7	53626	1.7289	0.0004029	0.0058717	192.027	399.563	1.055	no
ENSG00000103257	SLC7A5	protein_coding	solute carrier family 7 member 5	16309	1.7277	0.0040173	0.044159	25.3447	56.4695	1.1325	no
ENSG00000086062	B4GALT1	protein_coding	beta-1,4-galactosyltransferase 1	41729.5	1.7276	0.00040139	0.0058584	68.329	139.875	1.031	no
ENSG00000101782	RIOK3	protein_coding	RIO kinase 3	10646.8	1.7274	0.0018009	0.022362	24.7662	54.932	1.1069	no
ENSG00000035862	TIMP2	protein_coding	TIMP metallopeptidase inhibitor 2	118934	1.7268	0.00012144	0.0019961	231.531	485.995	1.0636	no
ENSG00000123562	MORF4L2	protein_coding	mortality factor 4 like 2	92101.8	1.726	0.00024866	0.0038031	599.797	1256.53	1.0657	no
ENSG00000105640	RPL18A	protein_coding	ribosomal protein L18a	81839.7	1.726	0.008227	0.0805	1398.64	3003.38	1.1015	no
ENSG00000112320	SOBP	protein_coding	sine oculis binding protein homolog	1290.13	1.7227	0.008038	0.079	2.2121	5.6969	1.2224	no
ENSG00000170385	SLC30A1	protein_coding	solute carrier family 30 member 1	10567.2	1.7213	0.00078932	0.010729	11.7071	25.4647	1	no
ENSG00000265681	RPL17	protein_coding	ribosomal protein L17	113577	1.7211	0.001928	0.023712	1776.44	3738.44	1.0732	no
ENSG00000097007	ABL1	protein_coding	ABL proto-oncogene 1, non-receptor tyrosine kinase	26447.4	1.7194	0.0031065	0.035528	34.8939	74.5752	1.078	no
ENSG00000059573	ALDH18A1	protein_coding	aldehyde dehydrogenase 18 family member A1	32642.1	1.7149	0.0004481	0.0064357	77.0226	155.354	1	no
ENSG00000163297	ANTXR2	protein_coding	ANTXR cell adhesion molecule 2	15284.8	1.7124	0.0001329	0.0021689	35.8063	73.908	1.0194	yes
ENSG00000169239	CA5B	protein_coding	carbonic anhydrase 5B	1686.9	1.7123	0.0098915	0.0934	4.9717	11.8747	1.1155	no
ENSG00000113269	RNF130	protein_coding	ring finger protein 130	4274.94	1.7092	0.0014824	0.018799	18.3429	36.721	1	no
ENSG00000164442	CITED2	protein_coding	Cbp/p300 interacting transactivator with Glu/Asp rich carboxy-terminal domain 2	46116.3	1.7071	0.0020455	0.02494	160.446	323.628	1.0134	no
ENSG00000197122	SRC	protein_coding	SRC proto-oncogene, non-receptor tyrosine kinase	5626.66	1.7069	0.0028531	0.033115	12.9196	26.7995	1	no
ENSG00000067066	SP100	protein_coding	SP100 nuclear antigen	11127.7	1.6944	0.00049705	0.0070534	44.9358	90.9887	1	no
ENSG00000105372	RPS19	protein_coding	ribosomal protein S19	96711.8	1.6936	0.0025525	0.030049	1509.75	3140.81	1.0562	no
ENSG00000111678	C12orf57	protein_coding	chromosome 12 open reading frame 57	6036.35	1.6934	0.0093939	0.0898	123.704	257.365	1.0454	no
ENSG00000137154	RPS6	protein_coding	ribosomal protein S6	165311	1.6933	0.0020512	0.02498	1229.75	2572.42	1.0636	no
ENSG00000122406	RPL5	protein_coding	ribosomal protein L5	88959.9	1.6878	0.002091	0.02537	728.134	1565.32	1.1031	no
ENSG00000170222	ADPRM	protein_coding	ADP-ribose/CDP-alcohol diphosphatase, manganese dependent	1184.39	1.6869	0.0044114	0.047663	8.1208	16.5114	1	no
ENSG00000102543	CDADC1	protein_coding	cytidine and dCMP deaminase domain containing 1	1108.19	1.6789	0.0050876	0.0539	9.5986	21.0015	1	no
ENSG00000115170	ACVR1	protein_coding	activin A receptor type 1	8138.89	1.6747	0.00045698	0.0065537	23.4541	46.5121	1	no
ENSG00000225553	PHF1	protein_coding	PHD finger protein 1	4859.5	1.6708	0.0046475	0.049887	20.1624	42.4743	1.0339	no
ENSG00000166741	NNMT	protein_coding	nicotinamide N-methyltransferase	75229.8	1.6685	0.006955	0.0698	703.544	1418.11	1.0092	no
ENSG00000104408	EIF3E	protein_coding	eukaryotic translation initiation factor 3 subunit E	41367.6	1.6663	0.0019242	0.023675	246.48	493.6	1.0029	no
ENSG00000142534	RPS11	protein_coding	ribosomal protein S11	92128.3	1.666	0.0033982	0.03826	1887.82	3947.87	1.0639	no
ENSG00000117262	GPR89A	protein_coding	G protein-coupled receptor 89A	10233.5	1.6652	0.0012026	0.015543	42.8931	92.6901	1.0952	yes
ENSG00000185950	IRS2	protein_coding	insulin receptor substrate 2	13595.9	1.6648	0.0040433	0.044354	10.6581	23.5689	1.0589	no
ENSG00000070214	SLC44A1	protein_coding	solute carrier family 44 member 1	56962.6	1.6585	0.00061145	0.0085141	45.5825	93.0297	1	yes
ENSG00000125691	RPL23	protein_coding	ribosomal protein L23	66435.4	1.6573	0.0054769	0.0572	1170.78	2485.12	1.0849	no
ENSG00000164938	TP53INP1	protein_coding	tumor protein p53 inducible nuclear protein 1	4748.57	1.654	0.0077107	0.0762	5.9204	12.5363	1	yes
ENSG00000168542	COL3A1	protein_coding	collagen type III alpha 1 chain	731137	1.6495	0.00073587	0.010067	911.014	1858.17	1.0274	no
ENSG00000005812	FBXL3	protein_coding	F-box and leucine rich repeat protein 3	9628.71	1.6433	0.0030271	0.034769	20.9872	43.3464	1	no
ENSG00000171862	PTEN	protein_coding	phosphatase and tensin homolog	9098.93	1.6427	0.0042429	0.046161	20.5211	42.9354	1	no
ENSG00000142279	WTIP	protein_coding	WT1 interacting protein	2902.46	1.6379	0.0040895	0.04478	10.8261	23.4893	1	no
ENSG00000115084	SLC35F5	protein_coding	solute carrier family 35 member F5	19938.3	1.6302	0.0026628	0.03117	72.0639	150.622	1.0581	no
ENSG00000095209	TMEM38B	protein_coding	transmembrane protein 38B	2245.87	1.6281	0.0089297	0.086	5.3937	11.3292	1	no
ENSG00000116604	MEF2D	protein_coding	myocyte enhancer factor 2D	9530.47	1.6261	0.009658	0.0918	18.0074	39.6523	1.1096	no
ENSG00000129518	EAPP	protein_coding	E2F associated phosphoprotein	3121.02	1.6207	0.0083927	0.0819	20.2362	41.8389	1.0339	no
ENSG00000152661	GJA1	protein_coding	gap junction protein alpha 1	51159.8	1.6146	0.0033829	0.038131	117.933	246.724	1.0594	yes
ENSG00000008988	RPS20	protein_coding	ribosomal protein S20	72584.9	1.6045	0.007794	0.0769	1327.18	2673.88	1.0103	no
ENSG00000115295	CLIP4	protein_coding	CAP-Gly domain containing linker protein family member 4	5558.88	1.6037	0.0050771	0.0538	16.3594	34.4425	1.0418	no
ENSG00000140948	ZCCHC14	protein_coding	zinc finger CCHC-type containing 14	2615.06	1.6035	0.0025735	0.030284	3.3523	6.7114	1	no
ENSG00000116954	RRAGC	protein_coding	Ras related GTP binding C	7587.85	1.6006	0.0081783	0.0801	22.6735	46.7932	1	no
ENSG00000204611	ZNF616	protein_coding	zinc finger protein 616	1588.78	1.5945	0.0086508	0.0838	7.4439	14.8166	1	no
ENSG00000007047	MARK4	protein_coding	microtubule affinity regulating kinase 4	6673.52	1.578	0.0055496	0.0579	23.8894	49.4398	1	no
ENSG00000179833	SERTAD2	protein_coding	SERTA domain containing 2	10155.2	1.5595	0.0077389	0.0764	15.1681	30.5336	1	no

## Sheet: Patient 6 | Day 28 vs Day 3 | d
ENSEMBL ID	Gene name	Biotype	Description	Base mean	log2 FC	P value	Adjusted P value	Reference expression (TPM)	Sample expression (TPM)	Discrete abs(log2 FC)	Significance in at least two out of three patients?
ENSG00000221852	KRTAP1-5	protein_coding	keratin associated protein 1-5	223.718	-10.9233	2.0626e-15	1.071e-13	8.2375	8.9138e-05	3.1699	no
ENSG00000233450	KIFC1	protein_coding	kinesin family member C1	42.6827	-9.0185	4.0765e-10	1.4224e-08	2.3141	0.0086067	1.585	yes
ENSG00000233844	KCNQ5-IT1	sense_intronic	NA	42.9262	-8.5565	3.3447e-08	9.3894e-07	3.8073	0	2.3219	yes
ENSG00000212724	KRTAP2-3	protein_coding	keratin associated protein 2-3	149.165	-8.4888	1.0931e-11	4.4474e-10	7.3106	0	3	yes
ENSG00000262862	KRTAP2-3	protein_coding	keratin associated protein 2-3	149.165	-8.4888	1.0931e-11	4.4474e-10	7.3106	0	3	yes
ENSG00000101188	NTSR1	protein_coding	neurotensin receptor 1	519.777	-8.2843	1.4286e-30	1.9644e-28	4.6505	0.011556	2.585	no
ENSG00000164045	CDC25A	protein_coding	cell division cycle 25A	387.791	-8.0688	1.2362e-31	1.8087e-29	3.6449	0.0030379	2.3219	yes
ENSG00000165194	PCDH19	protein_coding	protocadherin 19	3511.23	-7.9864	6.869e-100	6.5812e-97	11.4104	0.029142	3.585	yes
ENSG00000264472	RP11-861L17.3	antisense	NA	18.8161	-7.3648	4.535e-05	0.00082634	2.5449	0	2	no
ENSG00000176532	PRR15	protein_coding	proline rich 15	92.0476	-7.3198	1.2845e-10	4.7333e-09	2.1603	0.0074348	1.585	yes
ENSG00000266235	MIR3176	miRNA	microRNA 3176	34.6751	-7.3146	4.3951e-06	9.5634e-05	16.2159	0	4.0875	no
ENSG00000125787	GNRH2	protein_coding	gonadotropin releasing hormone 2	17.9729	-7.2966	8.0676e-05	0.0013875	2.3686	0	1.585	no
ENSG00000179750	APOBEC3B	protein_coding	apolipoprotein B mRNA editing enzyme catalytic subunit 3B	212.923	-7.2477	5.9191e-19	4.2078e-17	4.8921	0.011012	2.585	yes
ENSG00000154146	NRGN	protein_coding	neurogranin	128.785	-7.2468	1.2659e-13	5.8293e-12	4.3722	0	2.3219	yes
ENSG00000253335	RP11-420B22.1	antisense	NA	16.3804	-7.1651	0.00018976	0.0029805	2.3702	0	1.585	no
ENSG00000223458	LMO7DN-IT1	sense_intronic	LMO7DN intronic transcript 1	32.0894	-7.1466	8.9885e-06	0.00018462	9.172	0	3.3219	no
ENSG00000128510	CPA4	protein_coding	carboxypeptidase A4	244.524	-7.0745	5.1142e-26	5.3864e-24	2.5034	0.015179	2	no
ENSG00000101057	MYBL2	protein_coding	MYB proto-oncogene like 2	1008.38	-7.0645	9.0133e-61	3.8243e-58	11.5369	0.0596	3.7004	yes
ENSG00000266579	RP1-71H19.2	lincRNA	NA	15.0679	-7.0485	0.00022544	0.0034825	2.5078	0	2	no
ENSG00000283170	MIR382	miRNA	microRNA 382	14.6737	-7.0072	0.00019363	0.0030364	8.244	0	3.1699	no
ENSG00000251257	CTD-2263F21.1	antisense	NA	26.1679	-6.9206	2.9984e-05	0.000564	4.0848	0	2.3219	no
ENSG00000272707	RP11-534C12.1	lincRNA	NA	13.3528	-6.8668	0.0004959	0.0070405	7.7519	0	3.1699	no
ENSG00000262808	KRTAP1-1	protein_coding	keratin associated protein 1-1	92.6606	-6.8033	5.9682e-11	2.2697e-09	4.4205	0	2.3219	no
ENSG00000241493	RP11-274B21.5	processed_pseudogene	NA	11.6491	-6.6691	0.00096225	0.012759	5.189	0	2.585	no
ENSG00000244044	RN7SL735P	misc_RNA	RNA, 7SL, cytoplasmic 735, pseudogene	11.5027	-6.6578	0.00083928	0.011341	2.4313	0	1.585	no
ENSG00000233351	RP1-69D17.3	antisense	NA	22.3754	-6.6187	0.00015225	0.002451	3.7477	0	2.3219	no
ENSG00000248629	RP11-154F14.2	antisense	NA	11.1645	-6.6115	0.00093244	0.012386	6.0813	0	2.8074	no
ENSG00000270741	PRELID3BP8	processed_pseudogene	PRELI domain containing 3B pseudogene 8	11.0768	-6.6011	0.0011377	0.014776	4.3631	0	2.3219	no
ENSG00000228289	RP4-640E24.1	processed_pseudogene	NA	10.525	-6.5305	0.0018647	0.023047	2.4896	0	1.585	no
ENSG00000199015	MIR377	miRNA	microRNA 377	10.4682	-6.5192	0.0013791	0.017572	8.4772	0	3.1699	no
ENSG00000212135	SNORD67	snoRNA	small nucleolar RNA, C/D box 67	9.7062	-6.4081	0.0041152	0.044986	2.6782	0	2	no
ENSG00000266043	MIR3649	miRNA	microRNA 3649	9.4746	-6.3753	0.0022865	0.027347	6.8854	0	3	no
ENSG00000272764	RP11-318E3.9	lincRNA	NA	8.9629	-6.2941	0.0041961	0.045702	4.0371	0	2.3219	no
ENSG00000273997	RP11-361F15.5	processed_pseudogene	NA	8.1361	-6.156	0.0044718	0.048227	2.914	0	2	no
ENSG00000248682	ARHGAP22-IT1	sense_intronic	NA	30.5045	-6.1487	6.5347e-05	0.0011491	4.3966	0	2.3219	no
ENSG00000249304	RP11-26P13.2	antisense	NA	45.1454	-6.1381	7.1833e-07	1.7247e-05	7.5129	0.0586	3.1699	no
ENSG00000206630	SNORD60	snoRNA	small nucleolar RNA, C/D box 60	8.0197	-6.1345	0.0054545	0.057	4.7217	0	2.585	no
ENSG00000261786	RP4-555D20.2	lincRNA	NA	1335.66	-6.1202	6.4168e-56	2.3823e-53	7.6087	0.0515	3.1699	yes
ENSG00000199927	ACEA_U3	snoRNA	NA	7.7653	-6.089	0.0085113	0.0828	2.0189	0	1.585	no
ENSG00000117399	CDC20	protein_coding	cell division cycle 20	1825.55	-6.0861	5.9456e-50	1.7659e-47	42.1378	0.2737	5.4263	yes
ENSG00000260877	RP11-211G23.2	lincRNA	NA	15.343	-6.0459	0.0011351	0.014748	2.3685	0	1.585	no
ENSG00000266555	MIR3145	miRNA	microRNA 3145	7.0907	-5.9577	0.0086087	0.0835	5.0482	0	2.585	no
ENSG00000186185	KIF18B	protein_coding	kinesin family member 18B	1064.43	-5.9531	9.455e-47	2.5299e-44	8.5484	0.0762	3.3219	yes
ENSG00000118094	TREH	protein_coding	trehalase	195.423	-5.9514	8.0549e-20	6.0262e-18	4.0434	0.045801	2.3219	no
ENSG00000257219	RP11-54A9.1	lincRNA	lncRNA osteogenesis associated	451.328	-5.9405	1.5911e-07	4.0987e-06	26.36	0.2337	4.7549	yes
ENSG00000109674	NEIL3	protein_coding	nei like DNA glycosylase 3	156.1	-5.9393	1.7396e-16	9.9636e-15	2.2567	0.014828	1.585	yes
ENSG00000137877	SPTBN5	protein_coding	spectrin beta, non-erythrocytic 5	1050.22	-5.9342	7.5733e-10	2.5659e-08	3.7885	0.01598	2.3219	no
ENSG00000207754	MIR487B	miRNA	microRNA 487b	13.2336	-5.8895	0.002187	0.026384	7.988	0	3.1699	no
ENSG00000279501	bP-2171C21.3	lincRNA	NA	60.6115	-5.8299	5.6666e-08	1.5398e-06	28.6648	0	4.9069	yes
ENSG00000143631	FLG	protein_coding	filaggrin	2142.62	-5.8287	8.3119e-40	1.7889e-37	4.2816	0.030438	2.3219	no
ENSG00000250155	CTD-2353F22.1	antisense	uncharacterized LOC107986412	63.639	-5.7681	2.9781e-08	8.4241e-07	6.3896	0	2.8074	no
ENSG00000066279	ASPM	protein_coding	assembly factor for spindle microtubules	2226.94	-5.7567	8.506e-05	0.0014536	7.6989	0.016477	3.1699	yes
ENSG00000113368	LMNB1	protein_coding	lamin B1	1379.23	-5.6676	2.6352e-56	1.0165e-53	21.9105	0.2256	4.5236	yes
ENSG00000065328	MCM10	protein_coding	minichromosome maintenance 10 replication initiation factor	644.01	-5.6442	3.0168e-37	5.7071e-35	5.2807	0.0713	2.585	yes
ENSG00000228955	RP11-452J6.2	processed_pseudogene	NA	11.2684	-5.644	0.0060497	0.0623	5.8256	0	2.8074	no
ENSG00000276953	TRBV12-4	TR_V_gene	T cell receptor beta variable 12-4	98.2736	-5.619	4.9006e-12	2.0529e-10	16.8978	0.2088	4.1699	no
ENSG00000164850	GPER1	protein_coding	G protein-coupled estrogen receptor 1	303.668	-5.6019	5.4768e-24	5.2058e-22	4.3077	0.0567	2.3219	yes
ENSG00000260095	RP11-715J22.3	antisense	NA	11.2346	-5.5881	0.0073624	0.0732	2.6222	0	2	no
ENSG00000170439	METTL7B	protein_coding	methyltransferase like 7B	465.994	-5.496	3.9382e-31	5.5966e-29	12.4334	0.1984	3.7004	yes
ENSG00000199804	RNA5SP383	rRNA	RNA, 5S ribosomal pseudogene 383	9.681	-5.4867	0.0084317	0.0822	6.6797	0	3	no
ENSG00000162062	C16orf59	protein_coding	tubulin epsilon and delta complex 2	204.39	-5.4687	5.2016e-17	3.1594e-15	5.4994	0.096	2.585	yes
ENSG00000205177	C11orf91	protein_coding	chromosome 11 open reading frame 91	58.9314	-5.4524	2.3389e-08	6.7054e-07	8.23	0.114	3.1699	yes
ENSG00000109805	NCAPG	protein_coding	non-SMC condensin I complex subunit G	1371.82	-5.4321	1.7325e-39	3.6754e-37	13.8437	0.1594	3.9069	yes
ENSG00000277909	SPC25	protein_coding	SPC25 component of NDC80 kinetochore complex	238.448	-5.4043	9.8826e-18	6.3259e-16	6.5076	0.1121	3	yes
ENSG00000122952	ZWINT	protein_coding	ZW10 interacting kinetochore protein	1091.26	-5.368	3.7055e-42	8.5316e-40	23.8444	0.3068	4.6439	yes
ENSG00000090889	KIF4A	protein_coding	kinesin family member 4A	1011.89	-5.3332	1.0728e-31	1.5853e-29	6.5348	0.0631	3	yes
ENSG00000085999	RAD54L	protein_coding	RAD54 like	387.175	-5.3309	2.556e-25	2.5561e-23	5.3137	0.0763	2.585	yes
ENSG00000112984	KIF20A	protein_coding	kinesin family member 20A	1291.71	-5.3033	1.3667e-07	3.5669e-06	16.0975	0.1647	4.0875	yes
ENSG00000171848	RRM2	protein_coding	ribonucleotide reductase regulatory subunit M2	3157	-5.271	1.8082e-31	2.6327e-29	47.0147	0.936	4.585	yes
ENSG00000143228	NUF2	protein_coding	NUF2 component of NDC80 kinetochore complex	770.319	-5.2569	1.1334e-37	2.2003e-35	15.7095	0.3431	4.0875	yes
ENSG00000267141	CTB-31O20.8	antisense	NA	31.9808	-5.2447	5.9215e-05	0.0010531	3.1468	0	2	yes
ENSG00000105011	ASF1B	protein_coding	anti-silencing function 1B histone chaperone	348.088	-5.2416	0.0013816	0.017589	9.4968	0.137	3.3219	yes
ENSG00000279669	RP11-717F1.1	lincRNA	NA	16.1444	-5.2414	0.003361	0.037899	2.6613	0	2	no
ENSG00000127564	PKMYT1	protein_coding	protein kinase, membrane associated tyrosine/threonine 1	614.699	-5.2262	2.7882e-30	3.7472e-28	18.7697	0.2043	4.3219	yes
ENSG00000028277	POU2F2	protein_coding	POU class 2 homeobox 2	374.015	-5.2209	7.4541e-17	4.4636e-15	2.7691	0.038302	2	no
ENSG00000248890	HHIP-AS1	antisense	HHIP antisense RNA 1	260.116	-5.1952	3.4549e-17	2.1201e-15	9.6338	0.1119	3.4594	yes
ENSG00000272911	RP11-74E22.6	lincRNA	NA	15.2457	-5.178	0.0043161	0.046786	3.8088	0	2.3219	no
ENSG00000276365	MIR145	miRNA	microRNA 145	14.5043	-5.1751	0.0040322	0.04429	11.1165	0.227	3.585	yes
ENSG00000138180	CEP55	protein_coding	centrosomal protein 55	1208.29	-5.1627	3.1767e-29	4.0494e-27	16.6397	0.204	4.1699	yes
ENSG00000164161	HHIP	protein_coding	hedgehog interacting protein	919.681	-5.1616	1.8775e-28	2.2949e-26	9.7133	0.1127	3.4594	yes
ENSG00000253144	RP11-281O15.7	processed_pseudogene	NA	15.1405	-5.1064	0.0075649	0.075	2.3195	0.001824	1.585	no
ENSG00000013810	TACC3	protein_coding	transforming acidic coiled-coil containing protein 3	1560.4	-5.1006	1.1717e-38	2.4001e-36	24.6839	0.3516	4.7004	yes
ENSG00000140451	PIF1	protein_coding	PIF1 5'-to-3' DNA helicase	762.717	-5.0829	3.8838e-22	3.3339e-20	16.6563	0.292	4.1699	yes
ENSG00000126787	DLGAP5	protein_coding	DLG associated protein 5	1651.51	-5.0734	1.8112e-23	1.6655e-21	17.4647	0.2872	4.1699	yes
ENSG00000160401	CFAP157	protein_coding	cilia and flagella associated protein 157	208.125	-5.0475	1.6432e-15	8.5924e-14	3.9185	0.0913	2.3219	no
ENSG00000093009	CDC45	protein_coding	cell division cycle 45	329.796	-5.0384	9.2324e-18	5.9353e-16	10.3371	0.2607	3.4594	yes
ENSG00000178999	AURKB	protein_coding	aurora kinase B	537.612	-5.0195	8.2384e-27	9.0291e-25	22.6222	0.3209	4.585	yes
ENSG00000148773	MKI67	protein_coding	marker of proliferation Ki-67	2820.81	-5.006	1.0713e-05	0.0002178	9.7994	0.2842	3.4594	yes
ENSG00000210176	MT-TH	Mt_tRNA	NA	26.3126	-4.9763	0.00021753	0.0033774	17.7538	0.319	4.2479	no
ENSG00000168078	PBK	protein_coding	PDZ binding kinase	1086.29	-4.9529	3.0302e-22	2.6393e-20	18.6209	0.2474	4.3219	yes
ENSG00000240925	RPS20P31	processed_pseudogene	ribosomal protein S20 pseudogene 31	27.4651	-4.9417	0.00022004	0.0034128	8.7761	0.118	3.3219	no
ENSG00000237649	KIFC1	protein_coding	kinesin family member C1	1043.32	-4.9361	6.1442e-32	9.3106e-30	15.2268	0.344	4	yes
ENSG00000159763	PIP	protein_coding	prolactin induced protein	95.0545	-4.928	5.7972e-09	1.7992e-07	9.4984	0.1031	3.3219	no
ENSG00000132688	NES	protein_coding	nestin	4325.68	-4.9	6.2112e-45	1.5634e-42	20.7395	0.3664	4.4594	yes
ENSG00000230928	RP11-34A14.3	antisense	NA	143.055	-4.8125	9.8121e-11	3.652e-09	3.7932	0.09	2.3219	no
ENSG00000203818	HIST2H3PS2	protein_coding	NA	18.5405	-4.7985	0.0033965	0.038255	2.3585	0	1.585	no
ENSG00000143867	OSR1	protein_coding	odd-skipped related transcription factor 1	504.24	-4.7924	2.7814e-17	1.7391e-15	7.664	0.2096	3.1699	yes
ENSG00000200879	SNORD14E	snoRNA	small nucleolar RNA, C/D box 14E	16.9593	-4.7841	0.0029391	0.033967	9.0374	0.2281	3.3219	no
ENSG00000280968	MIR3653	miRNA	NA	36.4906	-4.7836	2.0409e-05	0.00039547	20.1506	0.3644	4.3923	no
ENSG00000089685	BIRC5	protein_coding	baculoviral IAP repeat containing 5	2043.25	-4.7808	4.5182e-45	1.147e-42	27.6863	0.5919	3.858	yes
ENSG00000223519	KIF28P	unitary_pseudogene	NA	42.8677	-4.743	1.6897e-05	0.00033368	3.0212	0.1127	2	no
ENSG00000130590	SAMD10	protein_coding	sterile alpha motif domain containing 10	134.671	-4.7242	3.5254e-11	1.3616e-09	2.8917	0.06	2	no
ENSG00000165244	ZNF367	protein_coding	zinc finger protein 367	306.628	-4.7192	1.8317e-25	1.8568e-23	2.2742	0.0573	1.585	yes
ENSG00000186871	ERCC6L	protein_coding	ERCC excision repair 6 like, spindle assembly checkpoint helicase	387.39	-4.7116	7.5394e-23	6.7246e-21	2.6369	0.0638	2	yes
ENSG00000171522	PTGER4	protein_coding	prostaglandin E receptor 4	1585.68	-4.6516	7.1887e-34	1.1862e-31	15.3649	0.3099	4	no
ENSG00000262634	SKA1	protein_coding	spindle and kinetochore associated complex subunit 1	155.915	-4.6436	2.1213e-11	8.457e-10	3.7524	0.1047	2.3219	yes
ENSG00000174236	REP15	protein_coding	RAB15 effector protein	91.9774	-4.637	4.083e-10	1.4224e-08	2.7779	0.0719	2	no
ENSG00000261490	RP11-448G15.3	sense_overlapping	NA	368.617	-4.6361	0.0011384	0.014778	2.9903	0.033876	2	no
ENSG00000186193	SAPCD2	protein_coding	suppressor APC domain containing 2	450.839	-4.6189	4.0242e-17	2.4593e-15	3.754	0.0651	2.3219	yes
ENSG00000128606	LRRC17	protein_coding	leucine rich repeat containing 17	1641.67	-4.6159	6.1003e-29	7.6774e-27	25.5764	0.7154	3.7549	no
ENSG00000165480	SKA3	protein_coding	spindle and kinetochore associated complex subunit 3	427.887	-4.5922	4.585e-22	3.8909e-20	8.2839	0.2704	3.1699	yes
ENSG00000134057	CCNB1	protein_coding	cyclin B1	3186.37	-4.5886	1.5621e-24	1.5262e-22	70.6377	1.6012	4.585	yes
ENSG00000106003	LFNG	protein_coding	LFNG O-fucosylpeptide 3-beta-N-acetylglucosaminyltransferase	188.007	-4.5837	5.529e-16	3.0523e-14	3.4357	0.0941	2	no
ENSG00000246859	STARD4-AS1	antisense	STARD4 antisense RNA 1	2900.18	-4.5766	6.4844e-06	0.00013659	35.8584	0.8923	4.2095	yes
ENSG00000156103	MMP16	protein_coding	matrix metallopeptidase 16	771.476	-4.5578	2.4846e-16	1.4083e-14	2.2925	0.03692	1.585	yes
ENSG00000271553	RP11-274B21.10	lincRNA	NA	90.8074	-4.5545	4.0192e-09	1.2632e-07	3.3307	0.0549	2	no
ENSG00000231298	LINC00704	lincRNA	mitotically associated long non coding RNA	98.9708	-4.5522	1.4624e-10	5.3427e-09	2.6129	0.0571	2	no
ENSG00000024526	DEPDC1	protein_coding	DEP domain containing 1	950.702	-4.549	1.7365e-33	2.8184e-31	6.5595	0.1711	3	yes
ENSG00000011347	SYT7	protein_coding	synaptotagmin 7	2235.61	-4.548	6.3635e-32	9.594e-30	15.2304	0.5027	3	yes
ENSG00000183856	IQGAP3	protein_coding	IQ motif containing GTPase activating protein 3	1593.65	-4.5465	6.503e-07	1.5728e-05	9.3216	0.1355	3.3219	yes
ENSG00000207646	MIR655	miRNA	microRNA 655	18.1728	-4.5361	0.0066098	0.067	14.3106	0	3.9069	no
ENSG00000105255	FSD1	protein_coding	fibronectin type III and SPRY domain containing 1	354.605	-4.5299	0.00018243	0.0028796	7.6019	0.106	3.1699	yes
ENSG00000146670	CDCA5	protein_coding	cell division cycle associated 5	797.06	-4.5173	1.6083e-26	1.7434e-24	12.3222	0.2834	3.7004	yes
ENSG00000118849	RARRES1	protein_coding	retinoic acid receptor responder 1	75.9299	-4.5134	6.7726e-09	2.091e-07	3.0708	0.1067	2	no
ENSG00000156970	BUB1B	protein_coding	BUB1 mitotic checkpoint serine/threonine kinase B	801.505	-4.5134	1.7814e-29	2.3004e-27	11.1807	0.2769	3.585	yes
ENSG00000157456	CCNB2	protein_coding	cyclin B2	988.922	-4.4948	1.0631e-06	2.5159e-05	21.7897	0.4606	4.5236	yes
ENSG00000175063	UBE2C	protein_coding	ubiquitin conjugating enzyme E2 C	859.836	-4.4946	4.4098e-19	3.1485e-17	48.0108	0.7734	4.6147	yes
ENSG00000254717	GLYATL1P2	transcribed_unprocessed_pseudogene	NA	139.175	-4.4941	1.0885e-10	4.031e-09	9.833	0.3072	3.4594	yes
ENSG00000177602	GSG2	protein_coding	histone H3 associated protein kinase	188.202	-4.4927	1.1211e-15	5.978e-14	2.0814	0.0514	1.585	yes
ENSG00000157193	LRP8	protein_coding	LDL receptor related protein 8	1472.21	-4.483	1.9108e-52	6.3767e-50	15.2069	0.3972	4	yes
ENSG00000258425	CTD-2207P18.1	lincRNA	NA	28.804	-4.463	0.00060571	0.0084421	2.1249	0.049331	1.585	no
ENSG00000171241	SHCBP1	protein_coding	SHC binding and spindle associated 1	1795.41	-4.4538	1.7085e-50	5.286e-48	15.3071	0.4182	4	yes
ENSG00000154133	ROBO4	protein_coding	roundabout guidance receptor 4	123.223	-4.4519	9.8724e-09	2.9769e-07	2.1708	0.0594	1.585	no
ENSG00000241360	PDXP	protein_coding	pyridoxal phosphatase	367.813	-4.4473	3.5788e-14	1.7034e-12	6.4543	0.1747	2.8074	no
ENSG00000266124	MIR5587	miRNA	microRNA 5587	31.696	-4.4415	0.00063523	0.0088122	27.6539	0	4.858	no
ENSG00000220785	MTMR9LP	transcribed_unprocessed_pseudogene	NA	310.374	-4.4364	3.7221e-20	2.8715e-18	4.1663	0.1497	2.3219	yes
ENSG00000117724	CENPF	protein_coding	centromere protein F	2834.5	-4.4305	3.7724e-50	1.1318e-47	20.3802	0.612	3.3923	yes
ENSG00000134690	CDCA8	protein_coding	cell division cycle associated 8	888.022	-4.4206	4.8563e-24	4.6378e-22	10.8892	0.229	3.585	yes
ENSG00000100526	CDKN3	protein_coding	cyclin dependent kinase inhibitor 3	553.146	-4.4	8.9031e-28	1.037e-25	28.9445	0.9525	3.9069	yes
ENSG00000131153	GINS2	protein_coding	GINS complex subunit 2	384.91	-4.3984	1.9423e-18	1.3354e-16	4.8783	0.1204	2.585	yes
ENSG00000011426	ANLN	protein_coding	anillin actin binding protein	5267.08	-4.3907	3.0365e-27	3.4014e-25	33.9039	0.7685	4.1293	yes
ENSG00000256746	RP11-17G12.3	antisense	MADD antisense RNA 1	18.7419	-4.3791	0.0079782	0.0785	3.4577	0	2	no
ENSG00000170312	CDK1	protein_coding	cyclin dependent kinase 1	1739.59	-4.3759	4.8106e-05	0.00087229	29.2547	0.5603	3.9069	yes
ENSG00000129195	FAM64A	protein_coding	PICALM interacting mitotic regulator	399.197	-4.3754	3.5563e-21	2.8939e-19	10.7523	0.359	3.585	yes
ENSG00000178734	LMO7DN	protein_coding	LMO7 downstream neighbor	63.4427	-4.3594	1.7673e-07	4.5251e-06	2.0406	0.0644	1.585	no
ENSG00000157111	TMEM171	protein_coding	transmembrane protein 171	724.897	-4.3463	2.9439e-21	2.4087e-19	20.9446	0.449	4.4594	yes
ENSG00000210191	MT-TL2	Mt_tRNA	NA	146.54	-4.3447	3.3678e-07	8.3565e-06	78.4422	1.962	4.7188	no
ENSG00000157870	FAM213B	protein_coding	peroxiredoxin like 2B	819.207	-4.3423	3.533e-20	2.7326e-18	12.09	0.4138	3.7004	yes
ENSG00000275125	FAM213B	protein_coding	peroxiredoxin like 2B	819.207	-4.3423	3.533e-20	2.7326e-18	12.09	0.4138	3.7004	yes
ENSG00000259287	RP11-3D4.2	antisense	NA	39.8047	-4.3352	6.0309e-05	0.0010694	2.9014	0.1463	2	no
ENSG00000135451	TROAP	protein_coding	trophinin associated protein	563.561	-4.3183	1.7923e-17	1.1302e-15	16.5823	0.6119	3.1699	yes
ENSG00000087586	AURKA	protein_coding	aurora kinase A	1199.58	-4.3175	5.4665e-25	5.394e-23	18.7035	0.5199	3.3219	yes
ENSG00000169607	CKAP2L	protein_coding	cytoskeleton associated protein 2 like	901.707	-4.3164	4.1827e-23	3.7645e-21	6.4313	0.1404	2.8074	yes
ENSG00000137310	TCF19	protein_coding	transcription factor 19	520.807	-4.3133	9.3186e-25	9.1646e-23	5.5205	0.1871	2.8074	no
ENSG00000206455	TCF19	protein_coding	transcription factor 19	258.191	-4.3074	1.8416e-14	8.9521e-13	3.1805	0.0655	2	no
ENSG00000234674	TCF19	protein_coding	transcription factor 19	258.191	-4.3074	1.8416e-14	8.9521e-13	3.1805	0.0655	2	no
ENSG00000274444	RP11-128A17.2	lincRNA	NA	16.999	-4.2946	0.0093112	0.0892	2.4021	0	1.585	no
ENSG00000163462	TRIM46	protein_coding	tripartite motif containing 46	877.579	-4.294	1.2252e-31	1.8014e-29	8.9157	0.2556	3.3219	yes
ENSG00000171462	DLK2	protein_coding	delta like non-canonical Notch ligand 2	143.805	-4.2884	2.8004e-11	1.0987e-09	2.0868	0.046821	1.585	no
ENSG00000163814	CDCP1	protein_coding	CUB domain containing protein 1	565.047	-4.2795	6.9877e-26	7.2567e-24	3.8488	0.1045	2.3219	yes
ENSG00000094804	CDC6	protein_coding	cell division cycle 6	280.053	-4.2697	5.9398e-17	3.6003e-15	4.1356	0.1504	2.3219	yes
ENSG00000212541	RNU6-510P	snRNA	NA	63.5352	-4.2659	2.8164e-06	6.2942e-05	25.1015	0.8802	3.7004	no
ENSG00000077152	UBE2T	protein_coding	ubiquitin conjugating enzyme E2 T	279.58	-4.2632	0.0016708	0.020921	13.4611	0.2879	3.8074	yes
ENSG00000171345	KRT19	protein_coding	keratin 19	67.2149	-4.2623	5.5597e-06	0.0001188	2.1744	0.0691	1.585	no
ENSG00000146094	DOK3	protein_coding	docking protein 3	118.986	-4.2504	1.5699e-10	5.7142e-09	3.9019	0.1446	2.3219	no
ENSG00000138675	FGF5	protein_coding	fibroblast growth factor 5	6500.76	-4.2489	8.5353e-64	3.9611e-61	42.485	1.3314	4.4263	yes
ENSG00000105894	PTN	protein_coding	pleiotrophin	485.095	-4.247	6.2723e-17	3.7942e-15	9.7652	0.3405	3.4594	yes
ENSG00000281165	SLC2A6	protein_coding	solute carrier family 2 member 6	368.382	-4.2429	2.562e-15	1.3188e-13	6.612	0.1426	3	yes
ENSG00000160326	SLC2A6	protein_coding	solute carrier family 2 member 6	368.382	-4.2429	2.562e-15	1.3188e-13	6.612	0.1426	3	yes
ENSG00000125637	PSD4	protein_coding	pleckstrin and Sec7 domain containing 4	1553.59	-4.2425	6.1398e-31	8.6838e-29	11.8399	0.5087	2.7004	yes
ENSG00000166851	PLK1	protein_coding	polo like kinase 1	1916.32	-4.2239	8.6627e-16	4.6951e-14	26.2541	1.0062	3.7549	yes
ENSG00000260778	MIR940	lincRNA	uncharacterized LOC106660606	71.2314	-4.2197	1.3872e-06	3.227e-05	7.9893	0.1942	3.1699	no
ENSG00000138316	ADAMTS14	protein_coding	ADAM metallopeptidase with thrombospondin type 1 motif 14	3651.08	-4.2176	9.0862e-47	2.4534e-44	16.2911	0.6503	3.0875	no
ENSG00000146410	MTFR2	protein_coding	mitochondrial fission regulator 2	113.868	-4.2097	5.1101e-10	1.7669e-08	2.6561	0.1097	2	yes
ENSG00000092853	CLSPN	protein_coding	claspin	1334.47	-4.2022	1.5166e-36	2.7979e-34	5.8171	0.1925	2.8074	yes
ENSG00000256083	RP11-366L20.3	antisense	NA	76.2197	-4.1936	2.5585e-06	5.7612e-05	10.7517	0.2192	3.585	yes
ENSG00000182481	KPNA2	protein_coding	karyopherin subunit alpha 2	6810.94	-4.1826	1.9878e-39	4.1577e-37	114.46	3.3976	4.8455	yes
ENSG00000142945	KIF2C	protein_coding	kinesin family member 2C	1215.62	-4.1785	3.0654e-18	2.0552e-16	14.5781	0.4821	4	yes
ENSG00000258531	BANF1P1	processed_pseudogene	NA	19.8497	-4.1781	0.0061357	0.063	8.2314	0.356	3.1699	no
ENSG00000267417	CTC-239J10.1	antisense	NA	16.109	-4.161	0.0095513	0.091	2.1553	0.0829	1.585	no
ENSG00000188229	TUBB4B	protein_coding	tubulin beta 4B class IVb	16105.9	-4.1596	2.1343e-20	1.677e-18	353.699	8.6544	5.1497	yes
ENSG00000123485	HJURP	protein_coding	Holliday junction recognition protein	753.033	-4.1469	1.6198e-27	1.8362e-25	9.2868	0.3849	3.3219	yes
ENSG00000229759	MRPS18AP1	processed_pseudogene	NA	22.7945	-4.1409	0.005991	0.0618	2.1383	0	1.585	no
ENSG00000274356	RP11-216L13.21	unprocessed_pseudogene	NA	26.8244	-4.1399	0.003799	0.042142	4.881	0	2.585	no
ENSG00000011332	DPF1	protein_coding	double PHD fingers 1	312.245	-4.1322	2.0216e-22	1.7764e-20	6.3984	0.2273	2.8074	yes
ENSG00000035499	DEPDC1B	protein_coding	DEP domain containing 1B	251.392	-4.1196	1.7289e-14	8.4318e-13	4.225	0.1274	2.3219	yes
ENSG00000111206	FOXM1	protein_coding	forkhead box M1	2187.32	-4.1177	1.1482e-27	1.3218e-25	21.8714	0.9835	3.5236	yes
ENSG00000225554	RP11-527D7.1	lincRNA	NA	22.9216	-4.1147	0.0051519	0.0544	2.788	0	2	no
ENSG00000121152	NCAPH	protein_coding	non-SMC condensin I complex subunit H	1078.57	-4.1064	2.1573e-31	3.1255e-29	8.2764	0.2902	3.1699	yes
ENSG00000122966	CIT	protein_coding	citron rho-interacting serine/threonine kinase	1403.6	-4.1024	4.3418e-28	5.1377e-26	8.8446	0.3327	3.3219	yes
ENSG00000268894	PLCE1-AS1	antisense	PLCE1 antisense RNA 1	216.174	-4.094	1.0446e-08	3.137e-07	6.3643	0.108	2.8074	no
ENSG00000112414	ADGRG6	protein_coding	adhesion G protein-coupled receptor G6	435.221	-4.093	0.00025388	0.0038728	2.1356	0.0942	1.585	yes
ENSG00000051341	POLQ	protein_coding	DNA polymerase theta	204.964	-4.0918	2.7312e-11	1.073e-09	2.0768	0.0935	1.585	yes
ENSG00000224629	RP5-1142J19.2	processed_pseudogene	NA	20.9579	-4.0878	0.0085338	0.083	11.6408	0	3.7004	no
ENSG00000082497	SERTAD4	protein_coding	SERTA domain containing 4	352.554	-4.0849	1.8586e-20	1.4681e-18	2.7598	0.1119	2	no
ENSG00000281230	SERTAD4	protein_coding	SERTA domain containing 4	352.554	-4.0849	1.8586e-20	1.4681e-18	2.7598	0.1119	2	no
ENSG00000160949	TONSL	protein_coding	tonsoku like, DNA repair protein	672.695	-4.0838	1.0651e-26	1.1588e-24	3.265	0.1061	2	yes
ENSG00000204556	CTD-2514C3.1	unprocessed_pseudogene	NA	46.5139	-4.0732	2.9593e-05	0.0005577	10.8561	0.412	3.585	no
ENSG00000143942	CHAC2	protein_coding	ChaC glutathione specific gamma-glutamylcyclotransferase 2	285.24	-4.0655	1.8635e-16	1.0623e-14	6.8516	0.2215	3	yes
ENSG00000166803	KIAA0101	protein_coding	PCNA clamp associated factor	1550.97	-4.0639	1.9624e-39	4.1337e-37	65.0522	2.3137	4.4594	yes
ENSG00000158402	CDC25C	protein_coding	cell division cycle 25C	185.746	-4.062	9.5857e-10	3.2206e-08	3.6021	0.135	2.3219	yes
ENSG00000205037	RP11-863P13.4	lincRNA	uncharacterized LOC400553	111.502	-4.0574	2.8518e-05	0.00053933	2.1905	0.02257	1.585	no
ENSG00000236390	RP11-25B7.1	antisense	NA	58.5154	-4.0492	1.7069e-05	0.00033663	4.5648	0.1549	2.585	no
ENSG00000106462	EZH2	protein_coding	enhancer of zeste 2 polycomb repressive complex 2 subunit	925.424	-4.046	7.5929e-29	9.4358e-27	9.5404	0.4336	3.4594	yes
ENSG00000266533	MIR3619	miRNA	microRNA 3619	24.1255	-4.0412	0.0020736	0.025209	15.9101	0.4683	4.0875	no
ENSG00000115163	CENPA	protein_coding	centromere protein A	262.044	-4.027	2.008e-10	7.2378e-09	9.8779	0.183	3.4594	yes
ENSG00000235121	RP11-90L20.2	antisense	NA	143.383	-4.0232	6.8951e-10	2.3566e-08	2.7137	0.1067	2	no
ENSG00000207870	MIR221	miRNA	microRNA 221	49.5594	-4.0177	4.2447e-05	0.00077869	27.5746	1.0305	3.858	no
ENSG00000079462	PAFAH1B3	protein_coding	platelet activating factor acetylhydrolase 1b catalytic subunit 3	244.762	-4.009	1.93e-12	8.2956e-11	11.8591	0.3589	3.7004	yes
ENSG00000137812	KNL1	protein_coding	kinetochore scaffold 1	1269.84	-4.0035	0.0078755	0.0776	5.1763	0.0861	2.585	yes
ENSG00000145681	HAPLN1	protein_coding	hyaluronan and proteoglycan link protein 1	21792.5	-4.0001	6.513e-26	6.8114e-24	149.509	4.4441	4.9165	yes
ENSG00000100162	CENPM	protein_coding	centromere protein M	252.603	-3.9967	2.7323e-14	1.3196e-12	12.1813	0.4877	3.7004	yes
ENSG00000147799	ARHGAP39	protein_coding	Rho GTPase activating protein 39	364.2	-3.9958	2.4964e-15	1.2895e-13	2.7707	0.0714	2	no
ENSG00000167900	TK1	protein_coding	thymidine kinase 1	1803.09	-3.9935	1.4073e-25	1.4414e-23	43.8007	1.4371	4.4919	yes
ENSG00000164611	PTTG1	protein_coding	PTTG1 regulator of sister chromatid separation, securin	1167.88	-3.9928	2.0652e-20	1.627e-18	66.8011	1.9731	4.5025	yes
ENSG00000144354	CDCA7	protein_coding	cell division cycle associated 7	691.28	-3.991	4.2007e-20	3.2239e-18	7.9692	0.2531	3.1699	yes
ENSG00000198975	MIRLET7A2	miRNA	microRNA let-7a-2	20.7656	-3.9887	0.0052027	0.0549	15.8688	0.556	3.0875	no
ENSG00000257221	MIR4496	antisense	NA	47.7535	-3.9784	9.8037e-05	0.0016475	6.1405	0.2488	2.8074	no
ENSG00000135502	SLC26A10	protein_coding	solute carrier family 26 member 10	221.712	-3.9737	1.906e-15	9.914e-14	6.0892	0.2501	2.8074	no
ENSG00000101412	E2F1	protein_coding	E2F transcription factor 1	399.362	-3.9719	2.449e-20	1.9192e-18	4.4564	0.1899	2.3219	yes
ENSG00000198901	PRC1	protein_coding	protein regulator of cytokinesis 1	2445.44	-3.9688	3.4927e-31	4.9874e-29	36.94	1.322	4.2479	yes
ENSG00000229334	AC046143.3	antisense	NA	169.363	-3.9519	2.3594e-11	9.3685e-10	6.3624	0.2672	2.8074	no
ENSG00000136244	IL6	protein_coding	interleukin 6	140.625	-3.9497	2.6185e-10	9.303e-09	6.1878	0.2818	2.8074	yes
ENSG00000229563	LINC01204	lincRNA	long intergenic non-protein coding RNA 1204	229.781	-3.945	6.0398e-16	3.322e-14	4.3855	0.1611	2.3219	yes
ENSG00000135476	ESPL1	protein_coding	extra spindle pole bodies like 1, separase	817.794	-3.938	6.4331e-16	3.5188e-14	5.5316	0.2979	2.8074	yes
ENSG00000267650	CTD-2553C6.1	antisense	NA	140.251	-3.9291	1.3874e-06	3.227e-05	4.1703	0.1051	2.3219	no
ENSG00000179431	FJX1	protein_coding	four-jointed box kinase 1	2987.87	-3.9277	7.3213e-29	9.1366e-27	38.4321	1.2768	4.2854	no
ENSG00000118193	KIF14	protein_coding	kinesin family member 14	860.446	-3.9265	8.9823e-23	7.9875e-21	3.4508	0.1106	2	yes
ENSG00000196155	PLEKHG4	protein_coding	pleckstrin homology and RhoGEF domain containing G4	1240.89	-3.9263	4.3939e-22	3.7501e-20	14.917	0.5542	3	no
ENSG00000099365	STX1B	protein_coding	syntaxin 1B	737.261	-3.9002	2.3862e-28	2.8927e-26	9.1325	0.3955	3.3219	no
ENSG00000143476	DTL	protein_coding	denticleless E3 ubiquitin protein ligase homolog	570.261	-3.8947	2.152e-19	1.5821e-17	4.2958	0.2075	2.3219	yes
ENSG00000071539	TRIP13	protein_coding	thyroid hormone receptor interactor 13	1144.32	-3.8901	6.9195e-26	7.2111e-24	16.6156	0.6978	3.1699	yes
ENSG00000233695	GAS6-AS1	antisense	NA	2827.27	-3.8895	1.2902e-23	1.2012e-21	10.971	0.4216	3.585	no
ENSG00000231906	RP11-541M12.3	processed_pseudogene	NA	33.0465	-3.8836	0.0013673	0.017452	17.0111	0.6924	3.1699	no
ENSG00000076382	SPAG5	protein_coding	sperm associated antigen 5	1787.34	-3.8747	1.0462e-35	1.8607e-33	16.9259	0.7115	3.1699	yes
ENSG00000169679	BUB1	protein_coding	BUB1 mitotic checkpoint serine/threonine kinase	1390.96	-3.872	3.4015e-17	2.096e-15	12.907	0.5455	2.8074	yes
ENSG00000106511	MEOX2	protein_coding	mesenchyme homeobox 2	180.482	-3.8699	2.1371e-10	7.6756e-09	2.1618	0.0683	1.585	no
ENSG00000129810	SGO1	protein_coding	shugoshin 1	180.037	-3.8513	1.1407e-08	3.3912e-07	2.9785	0.1677	2	yes
ENSG00000257354	RP11-631N16.2	lincRNA	NA	610.611	-3.8456	0.0034111	0.038391	2.0983	0.0625	1.585	no
ENSG00000101003	GINS1	protein_coding	GINS complex subunit 1	659.286	-3.8267	2.907e-21	2.3851e-19	6.7704	0.2587	3	yes
ENSG00000099849	RASSF7	protein_coding	Ras association domain family member 7	168.21	-3.824	2.8927e-09	9.278e-08	3.7777	0.1724	2.3219	yes
ENSG00000088836	SLC4A11	protein_coding	solute carrier family 4 member 11	223.593	-3.8171	2.3673e-09	7.6758e-08	2.6165	0.1191	2	no
ENSG00000274441	CTD-2282P23.2	antisense	NA	35.362	-3.8112	0.0010735	0.014003	8.6706	0.2208	3.3219	no
ENSG00000160957	RECQL4	protein_coding	RecQ like helicase 4	1241.92	-3.8023	5.1985e-18	3.4311e-16	14.8628	0.8354	3	yes
ENSG00000072571	HMMR	protein_coding	hyaluronan mediated motility receptor	1039.93	-3.7998	2.4394e-11	9.6734e-10	10.7579	0.6623	2.585	yes
ENSG00000196793	ZNF239	protein_coding	zinc finger protein 239	422.055	-3.7926	3.4651e-16	1.9455e-14	6.8822	0.3033	3	no
ENSG00000174600	CMKLR1	protein_coding	chemerin chemokine-like receptor 1	1091.46	-3.7804	2.8752e-11	1.1251e-09	6.0038	0.2099	2.8074	no
ENSG00000137312	FLOT1	protein_coding	flotillin 1	616.784	-3.778	1.6938e-15	8.8415e-14	16.9351	0.7137	3.1699	no
ENSG00000264914	RP11-343K8.3	antisense	NA	24.032	-3.7726	0.0097619	0.0925	6.9627	0.2318	3	no
ENSG00000255176	AP002954.3	antisense	NA	252.756	-3.7651	8.1521e-12	3.3675e-10	7.3019	0.2111	3	no
ENSG00000100065	CARD10	protein_coding	caspase recruitment domain family member 10	739.49	-3.7601	2.8655e-13	1.2895e-11	6.993	0.2458	3	yes
ENSG00000187800	PEAR1	protein_coding	platelet endothelial aggregation receptor 1	2515.82	-3.7595	6.095e-29	7.6774e-27	15.9703	0.91	3.0875	yes
ENSG00000102879	CORO1A	protein_coding	coronin 1A	120.453	-3.7587	3.8084e-08	1.0581e-06	2.2295	0.1302	1.585	no
ENSG00000255031	RP11-802E16.3	antisense	NA	204.27	-3.7574	9.2587e-11	3.459e-09	17.4201	0.6154	3.1699	no
ENSG00000128342	LIF	protein_coding	LIF interleukin 6 family cytokine	296.366	-3.7412	7.7401e-13	3.4159e-11	3.6459	0.1665	2.3219	no
ENSG00000156463	SH3RF2	protein_coding	SH3 domain containing ring finger 2	193.37	-3.7402	7.114e-12	2.951e-10	2.7799	0.1141	2	no
ENSG00000171320	ESCO2	protein_coding	establishment of sister chromatid cohesion N-acetyltransferase 2	362.123	-3.7388	2.0526e-18	1.4015e-16	3.0284	0.1338	2	yes
ENSG00000126562	WNK4	protein_coding	WNK lysine deficient protein kinase 4	861.821	-3.7289	8.9059e-14	4.1224e-12	6.5897	0.2919	3	yes
ENSG00000079215	SLC1A3	protein_coding	solute carrier family 1 member 3	2192.61	-3.7278	1.5808e-13	7.19e-12	22.9325	0.9318	3.585	no
ENSG00000197362	ZNF786	protein_coding	zinc finger protein 786	257.356	-3.7199	4.285e-13	1.9167e-11	2.2438	0.1044	1.585	no
ENSG00000182584	ACTL10	protein_coding	actin like 10	141.776	-3.7198	1.5881e-07	4.0944e-06	2.7296	0.1046	2	yes
ENSG00000078237	TIGAR	protein_coding	TP53 induced glycolysis regulatory phosphatase	2119.73	-3.7185	4.7778e-24	4.5776e-22	7.7794	0.4006	3.1699	no
ENSG00000158286	RNF207	protein_coding	ring finger protein 207	840.977	-3.7132	1.2344e-27	1.4101e-25	19.2703	0.8301	3.3219	yes
ENSG00000077264	PAK3	protein_coding	p21 (RAC1) activated kinase 3	336.058	-3.7104	4.6197e-09	1.4458e-07	3.6315	0.1225	2.3219	yes
ENSG00000231181	RP13-15M17.1	processed_pseudogene	ribosomal protein L9 pseudogene 11	23.8659	-3.7045	0.0058245	0.0603	2.3662	0.1461	1.585	no
ENSG00000178295	GEN1	protein_coding	GEN1 Holliday junction 5' flap endonuclease	1564.41	-3.7025	1.5126e-13	6.9223e-12	12.2651	0.4461	3.7004	no
ENSG00000144136	SLC20A1	protein_coding	solute carrier family 20 member 1	23959.7	-3.7014	2.5264e-37	4.8411e-35	307.316	12.4252	4.5663	no
ENSG00000214676	RPL9P16	processed_pseudogene	ribosomal protein L9 pseudogene 16	35.9264	-3.6981	0.0027551	0.032153	3.6089	0.1424	2.3219	no
ENSG00000004777	ARHGAP33	protein_coding	Rho GTPase activating protein 33	579.479	-3.6907	1.8178e-15	9.472e-14	11.182	0.5538	2.585	no
ENSG00000138778	CENPE	protein_coding	centromere protein E	1636.12	-3.6807	6.3399e-24	5.9969e-22	7.147	0.3625	3	yes
ENSG00000171877	FRMD5	protein_coding	FERM domain containing 5	360.442	-3.6659	1.2609e-12	5.4991e-11	2.5441	0.1378	2	yes
ENSG00000198890	PRMT6	protein_coding	protein arginine methyltransferase 6	1082.69	-3.6562	5.8056e-10	1.9934e-08	11.9623	0.4742	3.7004	no
ENSG00000254756	RP11-867G23.12	antisense	NA	33.8592	-3.6561	0.0017574	0.021932	3.1746	0.1006	2	no
ENSG00000168496	FEN1	protein_coding	flap structure-specific endonuclease 1	1339.99	-3.6552	1.2858e-21	1.0638e-19	19.6633	0.8311	3.3923	yes
ENSG00000167912	RP11-25K19.1	antisense	uncharacterized LOC100505501	226.813	-3.6541	4.0851e-10	1.4224e-08	8.4426	0.4287	3.1699	yes
ENSG00000269902	RP6-99M1.3	lincRNA	NA	110.84	-3.649	1.7251e-07	4.4286e-06	12.5961	0.4522	3.8074	no
ENSG00000163171	CDC42EP3	protein_coding	CDC42 effector protein 3	10254.4	-3.643	3.2762e-15	1.6662e-13	71.3392	2.5834	4.1699	no
ENSG00000113070	HBEGF	protein_coding	heparin binding EGF like growth factor	226.662	-3.6376	1.0605e-12	4.6388e-11	2.7783	0.1175	2	no
ENSG00000075218	GTSE1	protein_coding	G2 and S-phase expressed 1	956.766	-3.6341	1.0486e-22	9.2972e-21	10.2847	0.5389	2.4594	yes
ENSG00000163808	KIF15	protein_coding	kinesin family member 15	256.491	-3.6282	3.0125e-11	1.1757e-09	2.6888	0.1553	2	yes
ENSG00000280610	KIF15	protein_coding	kinesin family member 15	256.491	-3.6282	3.0125e-11	1.1757e-09	2.6888	0.1553	2	yes
ENSG00000178695	KCTD12	protein_coding	potassium channel tetramerization domain containing 12	20338.3	-3.6216	9.7285e-20	7.2237e-18	90.9647	3.6441	4.2016	no
ENSG00000232600	TONSL-AS1	antisense	NA	49.0552	-3.6117	0.00012101	0.0019901	7.0315	0.4894	3	no
ENSG00000139629	GALNT6	protein_coding	polypeptide N-acetylgalactosaminyltransferase 6	1288.36	-3.6082	1.4114e-15	7.4326e-14	12.8321	0.5951	2.8074	yes
ENSG00000185760	KCNQ5	protein_coding	potassium voltage-gated channel subfamily Q member 5	1158.69	-3.6065	0.00036263	0.0053531	6.6965	0.2172	3	yes
ENSG00000255790	RP11-711K1.7	sense_intronic	NA	72.2116	-3.5945	4.3826e-05	0.00080104	8.9505	0.4101	3.3219	no
ENSG00000117632	STMN1	protein_coding	stathmin 1	5724.95	-3.5906	1.4285e-23	1.3218e-21	153.233	6.9798	4.2668	yes
ENSG00000226287	TMEM191A	transcribed_unprocessed_pseudogene	transmembrane protein 191A (pseudogene)	32.8686	-3.5876	0.0014883	0.018859	2.0679	0.0609	1.585	no
ENSG00000117650	NEK2	protein_coding	NIMA related kinase 2	475.761	-3.5832	5.0624e-14	2.3866e-12	8.2153	0.431	3.1699	yes
ENSG00000138131	LOXL4	protein_coding	lysyl oxidase like 4	10218.1	-3.5816	1.4731e-27	1.6764e-25	79.0253	3.7551	4	yes
ENSG00000155749	ALS2CR12	protein_coding	flagellum associated containing coiled-coil domains 1	104.353	-3.5642	6.7252e-07	1.6213e-05	3.7657	0.1629	2.3219	no
ENSG00000138395	CDK15	protein_coding	cyclin dependent kinase 15	225.842	-3.5595	3.9236e-06	8.5877e-05	5.9105	0.2115	2.8074	no
ENSG00000255986	MT1JP	transcribed_unprocessed_pseudogene	metallothionein 1J, pseudogene	48.3109	-3.5552	0.0029641	0.034216	2.2549	0.017151	1.585	no
ENSG00000271936	RP11-443B20.1	antisense	NA	65.1857	-3.553	0.00021639	0.0033613	2.0336	0.1503	1.585	yes
ENSG00000265415	CTD-2510F5.4	antisense	NA	127.125	-3.5508	2.6326e-07	6.604e-06	33.9196	1.2291	4.1293	yes
ENSG00000187741	FANCA	protein_coding	FA complementation group A	767.368	-3.5488	2.0321e-14	9.8618e-13	19.5108	1.1058	3.3923	yes
ENSG00000149633	KIAA1755	protein_coding	KIAA1755	219.637	-3.533	2.7247e-05	0.00051711	3.0509	0.065	2	yes
ENSG00000184995	IFNE	protein_coding	interferon epsilon	92.5048	-3.5158	1.9588e-05	0.000381	2.3076	0.1428	1.585	no
ENSG00000145040	UCN2	protein_coding	urocortin 2	240.172	-3.5142	1.5673e-08	4.5772e-07	4.5437	0.2205	2.585	no
ENSG00000160796	NBEAL2	protein_coding	neurobeachin like 2	706.288	-3.5074	3.111e-17	1.925e-15	5.9034	0.2742	2.8074	no
ENSG00000101447	FAM83D	protein_coding	family with sequence similarity 83 member D	824.774	-3.5024	3.6423e-19	2.6194e-17	10.9858	0.5304	2.585	yes
ENSG00000261468	RP11-1024P17.1	sense_overlapping	NA	155.298	-3.4999	9.2351e-08	2.4512e-06	2.4412	0.0901	1.585	no
ENSG00000127528	KLF2	protein_coding	Kruppel like factor 2	1043.81	-3.496	3.6315e-15	1.8438e-13	19.4399	1.1803	3.3219	no
ENSG00000254639	CTD-2589M5.5	lincRNA	NA	30.9318	-3.4909	0.0031323	0.035795	2.0268	0.0829	1.585	yes
ENSG00000051180	RAD51	protein_coding	RAD51 recombinase	514.056	-3.4781	8.6512e-17	5.1185e-15	7.5894	0.3713	3.1699	yes
ENSG00000231566	RP5-1158E12.3	lincRNA	NA	49.4837	-3.4775	0.0035446	0.039593	11.6559	0.3219	3.7004	no
ENSG00000267061	RP11-760L24.1	antisense	NA	45.6133	-3.4583	0.0020155	0.024645	2.4159	0.191	1.585	no
ENSG00000119969	HELLS	protein_coding	helicase, lymphoid specific	1708.21	-3.4573	2.1091e-22	1.8424e-20	18.9954	0.9327	3.3219	yes
ENSG00000246763	RGMB-AS1	antisense	RGMB antisense RNA 1	262.582	-3.443	8.9107e-14	4.1224e-12	18.2247	1.0612	3.2479	no
ENSG00000089280	FUS	protein_coding	FUS RNA binding protein	18298.8	-3.4296	2.0189e-30	2.7506e-28	314.876	17.014	4.1339	yes
ENSG00000261060	RP11-545A16.4	sense_overlapping	NA	63.8082	-3.4274	0.0017595	0.021949	2.6984	0.0866	2	no
ENSG00000130592	LSP1	protein_coding	lymphocyte specific protein 1	1162.92	-3.4244	2.35e-18	1.5899e-16	31.243	1.7427	3.415	no
ENSG00000183814	LIN9	protein_coding	lin-9 DREAM MuvB core complex component	303.281	-3.4084	2.1072e-11	8.4121e-10	2.496	0.1461	1.585	no
ENSG00000187123	LYPD6	protein_coding	LY6/PLAUR domain containing 6	530.505	-3.4081	7.0842e-16	3.8607e-14	3.3452	0.2224	2	yes
ENSG00000088325	TPX2	protein_coding	TPX2 microtubule nucleation factor	4203.3	-3.3904	1.3197e-16	7.6553e-15	32.6646	1.7231	3.5025	yes
ENSG00000172927	MYEOV	protein_coding	myeloma overexpressed	113.491	-3.3875	5.6937e-06	0.00012123	7.7695	0.5141	2.1699	no
ENSG00000099625	CBARP	protein_coding	CACN subunit beta associated regulatory protein	516.499	-3.387	4.4575e-15	2.2439e-13	5.6298	0.2662	2.8074	no
ENSG00000273445	RP11-1399P15.1	antisense	NA	55.9458	-3.3858	0.0030051	0.034595	5.4787	0.0885	2.585	no
ENSG00000189057	FAM111B	protein_coding	family with sequence similarity 111 member B	539.123	-3.3819	1.0624e-13	4.8996e-12	4.5745	0.2847	2.585	yes
ENSG00000263528	IKBKE	protein_coding	inhibitor of nuclear factor kappa B kinase subunit epsilon	591.128	-3.3806	4.7139e-18	3.1255e-16	7.1393	0.4144	3	no
ENSG00000169258	GPRIN1	protein_coding	G protein regulated inducer of neurite outgrowth 1	326.853	-3.3728	5.3463e-11	2.0384e-09	2.3043	0.1312	1.585	no
ENSG00000170577	SIX2	protein_coding	SIX homeobox 2	3348.15	-3.3718	2.4721e-15	1.2791e-13	47.6499	2.2568	4.0297	no
ENSG00000266969	RP11-773H22.4	antisense	NA	35.3835	-3.3577	0.0034471	0.038707	3.5661	0.3547	2.3219	no
ENSG00000104147	OIP5	protein_coding	Opa interacting protein 5	177.832	-3.3535	7.082e-09	2.1775e-07	6.2643	0.4531	2.8074	yes
ENSG00000259571	BLID	protein_coding	BH3-like motif containing, cell death inducer	80.9891	-3.3408	0.0017725	0.022092	2.9128	0.1432	2	no
ENSG00000111641	NOP2	protein_coding	NOP2 nucleolar protein	3237.15	-3.3339	3.6806e-22	3.1778e-20	54.5038	3.0895	3.8074	yes
ENSG00000260121	RP5-1142A6.9	antisense	NA	475.041	-3.3163	1.3641e-16	7.8977e-15	8.0413	0.4908	3.1699	no
ENSG00000131747	TOP2A	protein_coding	DNA topoisomerase II alpha	6198.45	-3.3123	1.8634e-12	8.0209e-11	34.1916	1.7309	3.5443	yes
ENSG00000101945	SUV39H1	protein_coding	suppressor of variegation 3-9 homolog 1	396.448	-3.3084	2.6247e-10	9.3139e-09	4.9919	0.2913	2.585	yes
ENSG00000154330	PGM5	protein_coding	phosphoglucomutase 5	304.425	-3.3076	3.2025e-11	1.2483e-09	4.7506	0.2289	2.585	no
ENSG00000145945	FAM50B	protein_coding	family with sequence similarity 50 member B	261.994	-3.3036	2.3418e-05	0.00044835	5.3824	0.1881	2.585	no
ENSG00000167114	SLC27A4	protein_coding	solute carrier family 27 member 4	2104.24	-3.2961	2.1544e-16	1.2258e-14	19.6544	1.0412	3.3923	yes
ENSG00000223749	MIR503HG	lincRNA	NA	1334.09	-3.2953	3.1532e-09	1.0059e-07	111.98	4.3554	4.4983	no
ENSG00000173267	SNCG	protein_coding	synuclein gamma	83.3025	-3.2926	7.273e-06	0.00015163	4.6398	0.3064	2.585	yes
ENSG00000223811	RP11-437J19.1	lincRNA	NA	27.3981	-3.2922	0.00795	0.0783	2.4885	0.1761	1.585	no
ENSG00000155393	HEATR3	protein_coding	HEAT repeat containing 3	1639.1	-3.2915	5.4146e-26	5.6826e-24	13.165	0.8539	2.8074	no
ENSG00000111348	ARHGDIB	protein_coding	Rho GDP dissociation inhibitor beta	156.269	-3.2888	1.5097e-05	0.00030074	6.4016	0.2821	2.8074	no
ENSG00000206190	ATP10A	protein_coding	ATPase phospholipid transporting 10A (putative)	5181.71	-3.2824	6.4061e-13	2.8356e-11	24.1347	1.2195	3.6439	yes
ENSG00000121211	MND1	protein_coding	meiotic nuclear divisions 1	85.4441	-3.2794	0.00018144	0.0028681	3.4214	0.2695	2	yes
ENSG00000215328	HSPA1A	protein_coding	heat shock protein family A (Hsp70) member 1A	2319.51	-3.2793	0.0017954	0.022313	28.8147	1.1388	3.9069	no
ENSG00000111665	CDCA3	protein_coding	cell division cycle associated 3	767.785	-3.2764	4.0115e-20	3.0866e-18	14.6621	0.9982	3	yes
ENSG00000177380	PPFIA3	protein_coding	PTPRF interacting protein alpha 3	162.353	-3.2736	1.8837e-07	4.8064e-06	3.7491	0.2002	2.3219	no
ENSG00000267370	CTD-2623N2.3	unprocessed_pseudogene	zinc finger protein 420 pseudogene	51.8297	-3.2672	0.0028379	0.032963	3.2997	0.248	2	no
ENSG00000260804	PKI55	lincRNA	long intergenic non-protein coding RNA 1963	469.207	-3.2659	2.9875e-15	1.5246e-13	4.4374	0.2362	2.3219	no
ENSG00000225830	ERCC6	protein_coding	ERCC excision repair 6, chromatin remodeling factor	6633.62	-3.2636	1.8505e-23	1.6911e-21	37.9187	2.9327	3.2854	yes
ENSG00000158406	HIST1H4H	protein_coding	H4 clustered histone 8	116.352	-3.2633	4.5561e-06	9.8846e-05	2.4435	0.152	1.585	no
ENSG00000225813	AC009299.4	processed_pseudogene	NA	217.241	-3.2631	7.5317e-10	2.5576e-08	13.313	0.7165	2.8074	no
ENSG00000112742	TTK	protein_coding	TTK protein kinase	542.197	-3.2576	6.0826e-13	2.6964e-11	7.308	0.3981	3	yes
ENSG00000135074	ADAM19	protein_coding	ADAM metallopeptidase domain 19	6266.1	-3.2481	3.1749e-21	2.5906e-19	24.9789	1.5996	3.1155	yes
ENSG00000251567	RP11-775H9.2	lincRNA	NA	131.814	-3.2357	1.0307e-07	2.7236e-06	5.615	0.3805	2.8074	no
ENSG00000138160	KIF11	protein_coding	kinesin family member 11	1924.91	-3.2138	4.7144e-18	3.1255e-16	10.2695	0.6051	2.4594	yes
ENSG00000280213	UCKL1-AS1	antisense	UCKL1 antisense RNA 1	306.307	-3.2035	9.5843e-12	3.9156e-10	2.2177	0.1679	1.585	no
ENSG00000143801	PSEN2	protein_coding	presenilin 2	541.87	-3.2024	3.5587e-14	1.6966e-12	10.9554	0.7827	2.585	no
ENSG00000276043	UHRF1	protein_coding	ubiquitin like with PHD and ring finger domains 1	1132.42	-3.1974	1.1656e-15	6.1821e-14	9.1079	0.5495	2.3219	yes
ENSG00000162063	CCNF	protein_coding	cyclin F	909.046	-3.1949	6.7764e-18	4.4234e-16	6.59	0.4182	3	yes
ENSG00000076356	PLXNA2	protein_coding	plexin A2	4045.81	-3.1947	1.2007e-19	8.8936e-18	12.7573	0.8267	2.8074	no
ENSG00000142731	PLK4	protein_coding	polo like kinase 4	534.13	-3.1909	8.0385e-13	3.5371e-11	8.7688	0.5995	2.3219	yes
ENSG00000276657	PYCRL	protein_coding	pyrroline-5-carboxylate reductase 3	936.049	-3.1879	8.3637e-11	3.1342e-09	12.7116	0.6763	2.8074	yes
ENSG00000080986	NDC80	protein_coding	NDC80 kinetochore complex component	783.879	-3.1766	9.1934e-12	3.7767e-10	15.6373	1.0672	3.0875	yes
ENSG00000188486	H2AFX	protein_coding	H2A.X variant histone	1782.53	-3.1719	2.5814e-11	1.0182e-09	38.9886	2.0801	3.737	yes
ENSG00000186148	AC013271.3	processed_transcript	two pore channel 3 pseudogene	96.4135	-3.1642	6.9577e-05	0.0012163	4.5675	0.2073	2.585	no
ENSG00000260145	RP11-322D14.2	antisense	NA	51.8197	-3.1615	0.00048955	0.006967	3.1502	0.2398	2	no
ENSG00000163507	KIAA1524	protein_coding	cellular inhibitor of PP2A	1045.61	-3.1601	3.5496e-12	1.5104e-10	11.0413	0.6033	2.585	yes
ENSG00000135763	URB2	protein_coding	URB2 ribosome biogenesis homolog	1045.17	-3.1584	1.8055e-08	5.2319e-07	5.5467	0.4672	2.8074	no
ENSG00000110876	SELPLG	protein_coding	selectin P ligand	237.367	-3.152	4.5173e-10	1.5674e-08	2.9957	0.1956	2	no
ENSG00000177606	JUN	protein_coding	Jun proto-oncogene, AP-1 transcription factor subunit	4120.94	-3.1511	1.2843e-15	6.7876e-14	34.5373	2.0599	3.585	no
ENSG00000175592	FOSL1	protein_coding	FOS like 1, AP-1 transcription factor subunit	2823	-3.1441	2.3571e-13	1.0656e-11	59.1316	3.0973	3.9069	no
ENSG00000200534	SNORA33	snoRNA	small nucleolar RNA, H/ACA box 33	52.0451	-3.1339	0.0013804	0.017581	19.2833	1.2188	3.3219	no
ENSG00000197905	TEAD4	protein_coding	TEA domain transcription factor 4	558.421	-3.1282	6.5175e-10	2.2301e-08	12.8189	0.7415	2.8074	yes
ENSG00000135454	B4GALNT1	protein_coding	beta-1,4-N-acetyl-galactosaminyltransferase 1	870.012	-3.1269	1.0823e-16	6.3406e-15	7.5323	0.5968	2.1699	yes
ENSG00000167552	TUBA1A	protein_coding	tubulin alpha 1a	34386.7	-3.1242	1.4026e-16	8.1048e-15	616.754	36.526	4.0235	yes
ENSG00000258311	RP11-644F5.10	protein_coding	NA	1538.36	-3.1107	2.8568e-15	1.4604e-13	11.9073	1.0318	2.7004	no
ENSG00000241406	RN7SL515P	misc_RNA	RNA, 7SL, cytoplasmic 515, pseudogene	59.4139	-3.1038	0.00035191	0.0052156	17.9197	1.1754	3.2479	no
ENSG00000260910	LINC00565	lincRNA	NA	581.143	-3.1004	3.0951e-10	1.0879e-08	6.5072	0.4523	3	no
ENSG00000188191	PRKAR1B	protein_coding	protein kinase cAMP-dependent type I regulatory subunit beta	408.829	-3.1001	5.525e-08	1.5055e-06	9.7899	0.433	3.4594	yes
ENSG00000136108	CKAP2	protein_coding	cytoskeleton associated protein 2	1985.25	-3.0941	4.6197e-16	2.5791e-14	18.0987	1.1593	3.2479	no
ENSG00000144230	GPR17	protein_coding	G protein-coupled receptor 17	203.103	-3.0921	4.9449e-08	1.3511e-06	3.8817	0.3074	2.3219	yes
ENSG00000234520	HRAT17	lincRNA	heart tissue-associated transcript 17	45.0814	-3.0736	0.0093526	0.0895	4.6691	0.2445	2.585	no
ENSG00000104356	POP1	protein_coding	POP1 homolog, ribonuclease P/MRP subunit	990.435	-3.0719	4.7204e-16	2.6304e-14	7.1389	0.5314	2	yes
ENSG00000183840	GPR39	protein_coding	G protein-coupled receptor 39	209.399	-3.0653	2.5549e-05	0.00048674	2.3385	0.1174	1.585	no
ENSG00000243742	RPLP0P2	transcribed_processed_pseudogene	ribosomal protein lateral stalk subunit P0 pseudogene 2	423.77	-3.0648	5.7459e-07	1.3954e-05	6.8195	0.5679	2	no
ENSG00000176125	UFSP1	protein_coding	UFM1 specific peptidase 1 (inactive)	67.4488	-3.0495	0.0027648	0.03224	2.1452	0.0726	1.585	no
ENSG00000167772	ANGPTL4	protein_coding	angiopoietin like 4	18734.5	-3.0476	1.5502e-14	7.6355e-13	344.852	20.9893	3.9752	yes
ENSG00000174807	CD248	protein_coding	CD248 molecule	17870.1	-3.0453	0.0063873	0.065	207.588	8.5876	4.3854	no
ENSG00000136274	NACAD	protein_coding	NAC alpha domain containing	411.748	-3.0398	1.1863e-08	3.5235e-07	2.174	0.1803	1.585	no
ENSG00000137804	NUSAP1	protein_coding	nucleolar and spindle associated protein 1	1147.29	-3.0398	1.4496e-15	7.6067e-14	23.2722	1.6037	3	yes
ENSG00000114268	PFKFB4	protein_coding	6-phosphofructo-2-kinase/fructose-2,6-biphosphatase 4	1061.89	-3.0367	1.343e-11	5.4343e-10	15.7621	1.2019	3.0875	no
ENSG00000235033	RP11-61I13.3	antisense	DAAM2 antisense RNA 1	134.712	-3.0329	4.4759e-06	9.7248e-05	2.5831	0.2287	2	no
ENSG00000111247	RAD51AP1	protein_coding	RAD51 associated protein 1	365.576	-3.0233	2.1372e-10	7.6756e-09	7.2996	0.6864	2	yes
ENSG00000234177	LINC01114	lincRNA	long intergenic non-protein coding RNA 1114	135.709	-3.017	0.00021824	0.0033867	2.4497	0.1916	1.585	no
ENSG00000180287	PLD5	protein_coding	phospholipase D family member 5	1930.94	-3.0137	4.6448e-20	3.5464e-18	12.3154	0.9123	2.7004	yes
ENSG00000112877	CEP72	protein_coding	centrosomal protein 72	191.901	-3.012	1.1911e-07	3.1251e-06	3.4502	0.2577	2	yes
ENSG00000196700	ZNF512B	protein_coding	zinc finger protein 512B	2917.22	-3.0115	2.497e-11	9.8754e-10	11.8445	0.7915	2.7004	no
ENSG00000267193	RP11-116O18.3	antisense	NA	60.8833	-3.0103	0.00044229	0.0063646	9.2458	0.5008	2.3219	no
ENSG00000126778	SIX1	protein_coding	SIX homeobox 1	747.054	-3.0056	3.2967e-07	8.1938e-06	9.3388	0.6103	2.3219	no
ENSG00000134986	NREP	protein_coding	neuronal regeneration related protein	23095	-3.004	6.6967e-13	2.9598e-11	385.735	27.8814	3.7382	yes
ENSG00000281398	SNHG4	processed_transcript	NA	1236.53	-3.0026	7.5885e-14	3.5438e-12	38.062	3.1114	3.2854	yes
ENSG00000174371	EXO1	protein_coding	exonuclease 1	312.764	-3.001	1.7364e-09	5.7176e-08	5.3	0.4864	2.585	yes
ENSG00000237719	RP1-179N16.3	processed_pseudogene	NA	60.3114	-2.9935	0.00061501	0.0085557	3.9834	0.3291	2.3219	no
ENSG00000261373	VPS9D1-AS1	antisense	VPS9D1 antisense RNA 1	456.243	-2.9884	1.4885e-12	6.4634e-11	7.5531	0.6288	2.1699	no
ENSG00000110031	LPXN	protein_coding	leupaxin	932.837	-2.9884	2.5759e-15	1.3226e-13	17.3284	1.3894	3.1699	yes
ENSG00000159363	ATP13A2	protein_coding	ATPase cation transporting 13A2	3548.48	-2.9872	6.5677e-16	3.5858e-14	45.1935	3.2097	3.5236	no
ENSG00000168806	LCMT2	protein_coding	leucine carboxyl methyltransferase 2	654.389	-2.9869	2.1833e-07	5.5329e-06	3.0499	0.1874	2	no
ENSG00000110427	KIAA1549L	protein_coding	KIAA1549 like	3344.2	-2.9867	4.826e-20	3.6659e-18	9.4665	0.7875	2.3219	yes
ENSG00000169169	CPT1C	protein_coding	carnitine palmitoyltransferase 1C	748.584	-2.9824	1.3565e-11	5.4816e-10	13.0009	1.2138	2.8074	yes
ENSG00000138182	KIF20B	protein_coding	kinesin family member 20B	1591.02	-2.9808	4.9067e-11	1.878e-09	6.2143	0.5131	1.8074	yes
ENSG00000176890	TYMS	protein_coding	thymidylate synthetase	2843.49	-2.9785	1.032e-14	5.1341e-13	57.5714	3.8995	3.5607	yes
ENSG00000182685	BRICD5	protein_coding	BRICHOS domain containing 5	106.111	-2.9774	0.0015534	0.019599	2.9571	0.3368	2	no
ENSG00000267745	RP11-686D22.8	processed_transcript	NA	111.333	-2.9774	4.4738e-05	0.00081619	2.8647	0.2828	2	no
ENSG00000130038	CRACR2A	protein_coding	calcium release activated channel regulator 2A	444.16	-2.9696	2.4242e-08	6.9364e-07	4.0175	0.2893	2.3219	no
ENSG00000277161	PIGW	protein_coding	phosphatidylinositol glycan anchor biosynthesis class W	331.529	-2.9688	7.2901e-10	2.4859e-08	3.66	0.3121	2.3219	no
ENSG00000182667	NTM	protein_coding	neurotrimin	2458.94	-2.9672	8.3586e-19	5.8829e-17	43.5853	3.3516	3.4919	no
ENSG00000140853	NLRC5	protein_coding	NLR family CARD domain containing 5	4405.92	-2.963	2.1346e-12	9.162e-11	60.525	3.5408	3.6323	no
ENSG00000144355	DLX1	protein_coding	distal-less homeobox 1	384.989	-2.9564	7.2767e-05	0.0012639	8.2846	0.695	2.1699	no
ENSG00000179041	RRS1	protein_coding	ribosome biogenesis regulator 1 homolog	1403	-2.9494	1.6534e-14	8.0841e-13	25.1367	1.7417	3.1155	yes
ENSG00000127586	CHTF18	protein_coding	chromosome transmission fidelity factor 18	1214.3	-2.9416	1.5389e-11	6.1764e-10	18.5809	1.5153	2.737	yes
ENSG00000198331	HYLS1	protein_coding	HYLS1 centriolar and ciliogenesis associated	335.243	-2.9385	4.364e-08	1.2013e-06	5.1303	0.4874	2.585	no
ENSG00000137807	KIF23	protein_coding	kinesin family member 23	1437.98	-2.9323	7.8646e-17	4.6811e-15	18.8478	1.5282	2.737	yes
ENSG00000150636	CCDC102B	protein_coding	coiled-coil domain containing 102B	546.989	-2.9312	3.9305e-09	1.2393e-07	9.7887	0.8554	2.4594	no
ENSG00000164087	POC1A	protein_coding	POC1 centriolar protein A	445.212	-2.9303	1.0539e-08	3.1554e-07	6.7131	0.4595	3	yes
ENSG00000188766	SPRED3	protein_coding	sprouty related EVH1 domain containing 3	1436.24	-2.9237	1.6849e-16	9.6797e-15	14.1149	1.104	2.9069	yes
ENSG00000154529	CNTNAP3B	protein_coding	contactin associated protein family member 3B	1291.79	-2.9229	1.0438e-10	3.8751e-09	11.9795	0.8055	2.7004	no
ENSG00000128805	ARHGAP22	protein_coding	Rho GTPase activating protein 22	5623.1	-2.9167	1.4379e-15	7.5588e-14	117.73	10.0867	3.4354	no
ENSG00000123219	CENPK	protein_coding	centromere protein K	704.85	-2.914	2.4776e-11	9.8117e-10	20.1204	1.6798	2.8074	yes
ENSG00000141469	SLC14A1	protein_coding	solute carrier family 14 member 1 (Kidd blood group)	3659.37	-2.9125	4.1094e-15	2.0793e-13	42.8316	4.0017	3.1375	no
ENSG00000213694	S1PR3	protein_coding	sphingosine-1-phosphate receptor 3	2376.37	-2.9093	9.6268e-16	5.1892e-14	10.8931	0.8896	2.585	yes
ENSG00000100297	MCM5	protein_coding	minichromosome maintenance complex component 5	1774.19	-2.907	2.839e-10	1.0014e-08	23.6788	1.6087	3.0589	yes
ENSG00000188522	FAM83G	protein_coding	family with sequence similarity 83 member G	955.526	-2.893	1.9555e-09	6.4036e-08	4.9366	0.3976	2.585	yes
ENSG00000135437	RDH5	protein_coding	retinol dehydrogenase 5	2162.74	-2.8916	1.7411e-16	9.9636e-15	72.554	6.1384	3.4021	no
ENSG00000184207	PGP	protein_coding	phosphoglycolate phosphatase	1046.51	-2.8881	5.359e-09	1.6684e-07	12.8324	0.8494	2.8074	yes
ENSG00000144339	TMEFF2	protein_coding	transmembrane protein with EGF like and two follistatin like domains 2	385.949	-2.8858	1.5924e-08	4.6413e-07	3.4511	0.3454	2	no
ENSG00000120738	EGR1	protein_coding	early growth response 1	2195.39	-2.8828	3.9898e-08	1.1017e-06	17.4447	1.2132	3.1699	no
ENSG00000131188	PRR7	protein_coding	proline rich 7, synaptic	821.812	-2.8828	1.191e-07	3.1251e-06	22.1335	1.5023	2.9386	no
ENSG00000168067	MAP4K2	protein_coding	mitogen-activated protein kinase kinase kinase kinase 2	1046.14	-2.8792	1.3226e-08	3.9088e-07	9.3222	1.0056	2.3219	yes
ENSG00000121769	FABP3	protein_coding	fatty acid binding protein 3	62.3228	-2.8764	0.0020216	0.024696	3.8298	0.2972	2.3219	no
ENSG00000169715	MT1E	protein_coding	metallothionein 1E	6661.69	-2.8708	4.3502e-15	2.1936e-13	364.963	33.8347	3.3864	yes
ENSG00000111664	GNB3	protein_coding	G protein subunit beta 3	854.073	-2.8662	1.1891e-10	4.3926e-09	17.5925	1.2988	3.2479	yes
ENSG00000185480	PARPBP	protein_coding	PARP1 binding protein	638.465	-2.8601	1.6398e-07	4.2205e-06	9.6466	0.8981	2.4594	yes
ENSG00000180626	ZNF594	protein_coding	zinc finger protein 594	420.472	-2.8578	6.3755e-05	0.0011251	2.9113	0.2412	2	no
ENSG00000226149	RP1-69D17.4	lincRNA	NA	71.3789	-2.8578	0.00053654	0.007549	5.498	0.3595	2.585	no
ENSG00000250748	RP11-230G5.2	lincRNA	uncharacterized LOC105369187	163.768	-2.8542	0.00016106	0.0025745	5.8417	0.3626	2.8074	no
ENSG00000175832	ETV4	protein_coding	ETS variant transcription factor 4	741.374	-2.8451	9.2091e-12	3.7779e-10	14.2987	1.1837	2.9069	no
ENSG00000149090	PAMR1	protein_coding	peptidase domain containing associated with muscle regeneration 1	2068.62	-2.8424	2.9693e-19	2.1563e-17	21.6241	1.9393	2.9386	yes
ENSG00000092820	EZR	protein_coding	ezrin	5885.77	-2.8416	1.0379e-12	4.5469e-11	55.3976	4.2351	3.4854	yes
ENSG00000138311	ZNF365	protein_coding	zinc finger protein 365	453.596	-2.8413	4.2337e-12	1.7836e-10	3.9817	0.3132	2.3219	no
ENSG00000121621	KIF18A	protein_coding	kinesin family member 18A	643.85	-2.8356	3.617e-08	1.0106e-06	6.2759	0.3755	2.8074	yes
ENSG00000091127	PUS7	protein_coding	pseudouridine synthase 7	1590.16	-2.8321	4.8304e-08	1.3223e-06	16.1471	1.2895	3.0875	no
ENSG00000267774	RP11-2N1.2	antisense	NA	346.305	-2.8316	4.4013e-08	1.2104e-06	10.5083	1.0314	2.585	yes
ENSG00000116455	WDR77	protein_coding	WD repeat domain 77	2423.41	-2.8307	1.4512e-10	5.308e-09	37.8276	2.5918	3.2854	yes
ENSG00000196550	FAM72A	protein_coding	family with sequence similarity 72 member A	128.193	-2.8236	9.9537e-05	0.0016674	5.4263	0.4439	2.585	no
ENSG00000110104	CCDC86	protein_coding	coiled-coil domain containing 86	2136.29	-2.8149	2.8233e-10	9.9828e-09	34.6568	2.8733	3.1699	yes
ENSG00000198826	ARHGAP11A	protein_coding	Rho GTPase activating protein 11A	2065.48	-2.8091	2.8379e-10	1.0014e-08	17.2919	1.3555	3.1699	yes
ENSG00000198846	TOX	protein_coding	thymocyte selection associated high mobility group box	1419.27	-2.8055	2.0761e-14	1.0059e-12	9.1802	0.802	2.3219	yes
ENSG00000160193	WDR4	protein_coding	WD repeat domain 4	921.067	-2.8043	1.3576e-13	6.2418e-12	17.5912	1.5207	2.663	yes
ENSG00000115648	MLPH	protein_coding	melanophilin	1486.31	-2.7994	6.3375e-14	2.9736e-12	35.423	3.6173	2.848	yes
ENSG00000135723	FHOD1	protein_coding	formin homology 2 domain containing 1	3287.8	-2.7993	4.4585e-13	1.9913e-11	34.0725	2.9211	3.1293	no
ENSG00000162630	B3GALT2	protein_coding	beta-1,3-galactosyltransferase 2	1771.18	-2.7992	5.7475e-08	1.5604e-06	14.009	0.9388	2.9069	no
ENSG00000110400	NECTIN1	protein_coding	nectin cell adhesion molecule 1	487.362	-2.7969	2.7823e-09	8.9435e-08	4.6036	0.4105	2.585	yes
ENSG00000100413	POLR3H	protein_coding	RNA polymerase III subunit H	3054.86	-2.7892	1.8835e-13	8.5406e-12	49.7013	3.97	3.3505	no
ENSG00000050438	SLC4A8	protein_coding	solute carrier family 4 member 8	630.212	-2.7836	1.8382e-10	6.6419e-09	3.9128	0.3544	2.3219	no
ENSG00000164220	F2RL2	protein_coding	coagulation factor II thrombin receptor like 2	1434.32	-2.7805	1.1247e-15	5.9866e-14	11.3896	0.9601	2.585	yes
ENSG00000138092	CENPO	protein_coding	centromere protein O	1448.5	-2.7757	9.4314e-11	3.5191e-09	14.1601	1.1932	2.9069	yes
ENSG00000135318	NT5E	protein_coding	5'-nucleotidase ecto	11592.7	-2.7755	1.7292e-17	1.0927e-15	102.734	8.7874	3.3785	yes
ENSG00000005884	ITGA3	protein_coding	integrin subunit alpha 3	13532.9	-2.775	2.0633e-18	1.4056e-16	93.1174	8.9255	3.2327	no
ENSG00000267886	CTD-2291D10.4	lincRNA	NA	42.8425	-2.7736	0.0063126	0.0644	4.1035	0.2859	2.3219	no
ENSG00000240875	LINC00886	lincRNA	long intergenic non-protein coding RNA 886	343.277	-2.7645	1.9503e-09	6.3934e-08	8.3966	0.6725	2.1699	no
ENSG00000231925	TAPBP	protein_coding	TAP binding protein	164.306	-2.7506	4.7968e-06	0.00010361	2.7443	0.2899	2	no
ENSG00000271811	RP1-79C4.4	lincRNA	NA	164.257	-2.7459	6.6658e-05	0.0011687	2.7429	0.2246	2	no
ENSG00000185347	C14orf80	protein_coding	tubulin epsilon and delta complex 1	378.874	-2.7399	7.0824e-06	0.00014814	9.4998	0.8301	2.3219	yes
ENSG00000180801	ARSJ	protein_coding	arylsulfatase family member J	6262.8	-2.7359	6.8934e-09	2.1217e-07	45.0921	4.8212	2.9386	yes
ENSG00000185499	MUC1	protein_coding	mucin 1, cell surface associated	842.229	-2.7311	7.4005e-10	2.5207e-08	19.471	1.7203	2.737	no
ENSG00000079616	KIF22	protein_coding	kinesin family member 22	1422.3	-2.7311	1.8846e-11	7.5337e-10	24.2364	1.9672	3.0589	yes
ENSG00000276952	RP5-965G21.6	antisense	NA	211.524	-2.7305	5.2336e-06	0.00011229	10.7061	1.149	2.585	no
ENSG00000101361	NOP56	protein_coding	NOP56 ribonucleoprotein	6399.23	-2.7277	3.8247e-13	1.7134e-11	128.238	12.5077	3.2039	yes
ENSG00000228594	FNDC10	protein_coding	fibronectin type III domain containing 10	151.368	-2.7273	0.00014038	0.0022809	2.2462	0.1732	1.585	yes
ENSG00000224501	HSPA1B	protein_coding	heat shock protein family A (Hsp70) member 1B	1476.94	-2.7227	5.1696e-06	0.00011102	18.1202	1.134	3.2479	no
ENSG00000196460	RFX8	protein_coding	regulatory factor X8	2003.03	-2.7197	8.2498e-10	2.7844e-08	36.0606	2.629	3.2095	no
ENSG00000145247	OCIAD2	protein_coding	OCIA domain containing 2	332.62	-2.7176	1.3475e-07	3.5199e-06	13.2498	1.1325	2.8074	no
ENSG00000205683	DPF3	protein_coding	double PHD fingers 3	1403.63	-2.7124	1.3013e-11	5.2729e-10	15.4324	1.224	3	yes
ENSG00000172824	CES4A	protein_coding	carboxylesterase 4A	173.326	-2.7123	3.1746e-05	0.00059488	2.0493	0.1875	1.585	no
ENSG00000139354	GAS2L3	protein_coding	growth arrest specific 2 like 3	600.858	-2.7088	7.1445e-06	0.00014923	4.7806	0.589	1.585	yes
ENSG00000104783	KCNN4	protein_coding	potassium calcium-activated channel subfamily N member 4	367.386	-2.7058	1.0627e-07	2.8057e-06	6.7856	0.7026	2	no
ENSG00000258424	RP11-471B22.2	antisense	NA	64.3277	-2.703	0.0025402	0.029927	22.2933	1.2966	3.5236	no
ENSG00000198838	RYR3	protein_coding	ryanodine receptor 3	283.967	-2.7008	0.00018241	0.0028796	11.4997	0.7594	2.585	no
ENSG00000171729	TMEM51	protein_coding	transmembrane protein 51	136.691	-2.6971	0.0015441	0.019507	2.0384	0.1136	1.585	no
ENSG00000013297	CLDN11	protein_coding	claudin 11	11529.8	-2.697	8.8496e-16	4.7876e-14	155.423	14.0868	3.3785	no
ENSG00000068489	PRR11	protein_coding	proline rich 11	1391.03	-2.6951	3.1308e-14	1.5047e-12	17.694	1.6473	2.663	yes
ENSG00000171617	ENC1	protein_coding	ectodermal-neural cortex 1	2866.06	-2.6944	1.2332e-06	2.8886e-05	15.3394	0.8976	3	no
ENSG00000163535	SGO2	protein_coding	shugoshin 2	1267.75	-2.6936	2.6633e-07	6.6752e-06	9.899	0.7638	2.4594	yes
ENSG00000175305	CCNE2	protein_coding	cyclin E2	222.787	-2.6858	0.00073075	0.010006	4.6328	0.3988	2.585	no
ENSG00000173638	SLC19A1	protein_coding	solute carrier family 19 member 1	1375.37	-2.6832	1.1567e-10	4.2785e-09	16.2975	1.5762	2.5025	yes
ENSG00000184343	SRPK3	protein_coding	SRSF protein kinase 3	339.692	-2.6784	4.9736e-06	0.00010697	4.7208	0.557	1.585	no
ENSG00000228716	DHFR	protein_coding	dihydrofolate reductase	2150.9	-2.6781	3.1463e-06	6.979e-05	22.1654	1.9589	2.9386	no
ENSG00000115363	EVA1A	protein_coding	eva-1 homolog A, regulator of programmed cell death	1742.7	-2.6769	1.8055e-08	5.2319e-07	71.9811	6.4354	3.3825	no
ENSG00000149451	ADAM33	protein_coding	ADAM metallopeptidase domain 33	241.936	-2.6699	2.2158e-07	5.6057e-06	2.1079	0.1993	1.585	no
ENSG00000109971	HSPA8	protein_coding	heat shock protein family A (Hsp70) member 8	56726.8	-2.6692	1.4108e-13	6.4764e-12	660.954	65.2407	3.3263	no
ENSG00000135637	CCDC142	protein_coding	coiled-coil domain containing 142	840.3	-2.6661	1.4122e-10	5.1783e-09	13.3907	1.3699	2.8074	no
ENSG00000242114	MTFP1	protein_coding	mitochondrial fission process 1	338.56	-2.666	5.3984e-08	1.4737e-06	11.4918	1.2323	2.585	yes
ENSG00000112029	FBXO5	protein_coding	F-box protein 5	694.178	-2.6645	2.4017e-06	5.4493e-05	8.7114	0.7151	2.3219	yes
ENSG00000138650	PCDH10	protein_coding	protocadherin 10	987.151	-2.6635	1.6429e-13	7.461e-12	3.4107	0.347	2	yes
ENSG00000097046	CDC7	protein_coding	cell division cycle 7	640.758	-2.6603	3.6882e-08	1.0295e-06	8.6505	0.6335	2.3219	yes
ENSG00000121281	ADCY7	protein_coding	adenylate cyclase 7	3820.02	-2.6517	1.0377e-08	3.1195e-07	29.1454	2.7353	2.9069	no
ENSG00000106537	TSPAN13	protein_coding	tetraspanin 13	558.882	-2.6494	7.243e-09	2.2224e-07	8.0965	0.7886	2.1699	yes
ENSG00000000460	C1orf112	protein_coding	chromosome 1 open reading frame 112	604.395	-2.6469	4.6008e-08	1.2617e-06	6.2865	0.5235	1.8074	no
ENSG00000273592	MBOAT7	protein_coding	membrane bound O-acyltransferase domain containing 7	162.48	-2.6463	0.0013412	0.017155	4.1295	0.3846	2.3219	no
ENSG00000173546	CSPG4	protein_coding	chondroitin sulfate proteoglycan 4	4668.72	-2.6423	6.9071e-12	2.8692e-10	12.8248	1.2208	2.8074	yes
ENSG00000256268	RP11-221N13.3	lincRNA	long intergenic non-protein coding RNA 2454	367.128	-2.6421	1.5331e-05	0.00030478	27.0161	2.0698	3.2224	no
ENSG00000171130	ATP6V0E2	protein_coding	ATPase H+ transporting V0 subunit e2	963.205	-2.6417	9.6552e-09	2.916e-07	24.9777	2.165	3.1155	yes
ENSG00000099957	P2RX6	protein_coding	purinergic receptor P2X 6	260.286	-2.6362	3.07e-06	6.8199e-05	3.4453	0.4029	2	no
ENSG00000149781	FERMT3	protein_coding	fermitin family member 3	73.9848	-2.6295	0.0068903	0.0694	5.1753	0.3281	2.585	no
ENSG00000125551	PLGLB2	protein_coding	plasminogen like B2	161.177	-2.6239	6.8611e-05	0.0012015	2.3329	0.1881	1.585	no
ENSG00000085840	ORC1	protein_coding	origin recognition complex subunit 1	397.82	-2.6222	2.158e-09	7.0279e-08	3.3241	0.3286	2	yes
ENSG00000006062	MAP3K14	protein_coding	mitogen-activated protein kinase kinase kinase 14	246.233	-2.6204	0.0015046	0.019041	2.2009	0.3051	1.585	no
ENSG00000125378	BMP4	protein_coding	bone morphogenetic protein 4	677.352	-2.6177	1.3398e-06	3.1235e-05	12.6897	0.9399	2.8074	no
ENSG00000178531	CTXN1	protein_coding	cortexin 1	139.732	-2.6175	7.0146e-05	0.0012238	3.8175	0.3528	2.3219	yes
ENSG00000112759	SLC29A1	protein_coding	solute carrier family 29 member 1 (Augustine blood group)	1355.57	-2.6152	5.2553e-11	2.0063e-09	20.2208	1.8793	2.8074	no
ENSG00000073111	MCM2	protein_coding	minichromosome maintenance complex component 2	1542.04	-2.6151	5.0802e-11	1.9419e-09	12.5407	1.3084	2.8074	yes
ENSG00000238018	AC093110.3	antisense	NA	83.0923	-2.6145	0.0053032	0.0557	5.6839	0.335	2.8074	no
ENSG00000134297	PLEKHA8P1	transcribed_processed_pseudogene	pleckstrin homology domain containing A8 pseudogene 1	177.487	-2.6072	0.0015575	0.019643	4.5054	0.5628	1.585	no
ENSG00000161888	SPC24	protein_coding	SPC24 component of NDC80 kinetochore complex	898.027	-2.6048	7.8175e-11	2.9391e-09	17.4956	1.7386	2.585	yes
ENSG00000019144	PHLDB1	protein_coding	pleckstrin homology like domain family B member 1	11532.7	-2.5972	1.3895e-14	6.8785e-13	98.4936	9.9941	3.1699	no
ENSG00000196123	KIAA0895L	protein_coding	KIAA0895 like	1615.98	-2.5913	1.71e-12	7.3712e-11	16.8493	1.9369	2.585	no
ENSG00000145147	SLIT2	protein_coding	slit guidance ligand 2	6267.45	-2.5892	1.8312e-16	1.0459e-14	21.4163	2.2683	2.8745	yes
ENSG00000115318	LOXL3	protein_coding	lysyl oxidase like 3	2973.9	-2.5889	3.5528e-14	1.6965e-12	35.1706	3.9182	2.848	no
ENSG00000267493	CIRBP-AS1	antisense	CIRBP antisense RNA 1	163.76	-2.5857	9.0199e-05	0.0015317	4.7109	0.5301	1.585	no
ENSG00000261061	RP11-303E16.2	sense_intronic	NA	84.5445	-2.5819	0.0010673	0.013952	4.3085	0.4189	2.3219	no
ENSG00000281490	CICP14	processed_pseudogene	NA	691.697	-2.5771	0.00016698	0.0026507	5.9159	0.5035	1.8074	no
ENSG00000105486	LIG1	protein_coding	DNA ligase 1	1341.28	-2.575	1.1669e-11	4.7346e-10	14.9504	1.5693	2.415	yes
ENSG00000159640	ACE	protein_coding	angiotensin I converting enzyme	191.614	-2.5733	1.6944e-05	0.00033438	2.2961	0.2418	1.585	no
ENSG00000274081	PUF60	protein_coding	poly(U) binding splicing factor 60	2078.76	-2.5731	1.5847e-07	4.0892e-06	35.4637	4.5603	2.585	no
ENSG00000080493	SLC4A4	protein_coding	solute carrier family 4 member 4	815.348	-2.5678	2.0512e-09	6.7021e-08	2.9489	0.3287	2	yes
ENSG00000169515	CCDC8	protein_coding	coiled-coil domain containing 8	1111.82	-2.5655	3.4815e-06	7.6937e-05	8.759	1.166	2.3219	no
ENSG00000115461	IGFBP5	protein_coding	insulin like growth factor binding protein 5	10950.4	-2.5649	7.7475e-14	3.6124e-12	42.9084	4.9001	2.8745	no
ENSG00000264772	RP11-186B7.4	processed_transcript	NA	618.44	-2.5645	3.6133e-06	7.9791e-05	3.3928	0.2458	2	no
ENSG00000206053	HN1L	protein_coding	Jupiter microtubule associated homolog 2	4050.15	-2.5623	1.4865e-08	4.3585e-07	43.4769	4.1792	3.1375	yes
ENSG00000111602	TIMELESS	protein_coding	timeless circadian regulator	1722.08	-2.5618	3.7465e-10	1.3107e-08	10.3534	0.9732	2.4594	yes
ENSG00000181019	NQO1	protein_coding	NAD(P)H quinone dehydrogenase 1	15409.8	-2.5596	8.3683e-11	3.1342e-09	316.23	33.4364	3.2209	no
ENSG00000104738	MCM4	protein_coding	minichromosome maintenance complex component 4	975.908	-2.5594	7.5321e-09	2.3016e-07	20.5161	2.0387	2.8745	no
ENSG00000227039	ITGB2-AS1	antisense	ITGB2 antisense RNA 1	289.096	-2.5538	6.5179e-05	0.0011468	3.9952	0.4788	2.3219	no
ENSG00000143815	LBR	protein_coding	lamin B receptor	2300.95	-2.5518	2.1585e-07	5.4748e-06	21.1179	1.734	2.8745	no
ENSG00000233101	HOXB-AS3	antisense	HOXB cluster antisense RNA 3	161.761	-2.5493	0.0098379	0.0931	14.4402	0.8752	2.9069	no
ENSG00000075702	WDR62	protein_coding	WD repeat domain 62	427.641	-2.5492	9.6989e-08	2.5697e-06	4.3492	0.4743	2.3219	yes
ENSG00000125266	EFNB2	protein_coding	ephrin B2	4590.54	-2.5484	5.5902e-06	0.00011936	24.0079	2.2336	3.0589	no
ENSG00000164002	EXO5	protein_coding	exonuclease 5	355.622	-2.5474	0.0013141	0.01686	7.3136	0.4292	3	no
ENSG00000074416	MGLL	protein_coding	monoglyceride lipase	10676.4	-2.5388	3.7008e-10	1.2962e-08	68.8994	6.2615	3.3219	yes
ENSG00000110583	NAA40	protein_coding	N-alpha-acetyltransferase 40, NatD catalytic subunit	1301.83	-2.536	1.1951e-06	2.8075e-05	11.2416	1.1086	2.585	no
ENSG00000205238	SPDYE2	protein_coding	speedy/RINGO cell cycle regulator family member E2	296.563	-2.5328	0.00016238	0.0025916	5.2688	0.5865	1.585	no
ENSG00000146826	C7orf43	protein_coding	microtubule associated protein 11	719.734	-2.5324	0.00015948	0.0025547	13.5458	0.8582	2.9069	no
ENSG00000177374	HIC1	protein_coding	HIC ZBTB transcriptional repressor 1	1182.09	-2.5263	1.178e-06	2.7724e-05	14.2185	1.2827	2.9069	no
ENSG00000112118	MCM3	protein_coding	minichromosome maintenance complex component 3	2267.81	-2.5252	8.9928e-09	2.7227e-07	23.9848	2.9026	2.6439	yes
ENSG00000115526	CHST10	protein_coding	carbohydrate sulfotransferase 10	518.98	-2.5244	0.00010561	0.0017572	5.0033	0.3544	2.585	no
ENSG00000184378	ACTRT3	protein_coding	actin related protein T3	252.181	-2.5238	0.00043515	0.006277	3.7493	0.5632	1.3219	no
ENSG00000184661	CDCA2	protein_coding	cell division cycle associated 2	631.64	-2.5206	1.8239e-08	5.2793e-07	5.8597	0.6079	1.8074	yes
ENSG00000111331	OAS3	protein_coding	2'-5'-oligoadenylate synthetase 3	729.512	-2.5134	3.2899e-09	1.0484e-07	3.9882	0.4418	2.3219	no
ENSG00000154277	UCHL1	protein_coding	ubiquitin C-terminal hydrolase L1	10917.1	-2.5125	3.7638e-08	1.0467e-06	328.62	34.7006	3.1964	yes
ENSG00000121957	GPSM2	protein_coding	G protein signaling modulator 2	2152.93	-2.512	4.245e-12	1.7859e-10	20.9064	2.274	2.8745	no
ENSG00000177732	SOX12	protein_coding	SRY-box transcription factor 12	2135.86	-2.5104	1.1364e-08	3.382e-07	12.2415	1.127	2.7004	no
ENSG00000166396	SERPINB7	protein_coding	serpin family B member 7	261.64	-2.5094	5.3291e-05	0.00095695	3.3875	0.3783	2	yes
ENSG00000213190	MLLT11	protein_coding	MLLT11 transcription factor 7 cofactor	2820.05	-2.5093	2.4623e-08	7.032e-07	16.9849	1.5988	2.585	no
ENSG00000146409	SLC18B1	protein_coding	solute carrier family 18 member B1	509.084	-2.5049	8.8342e-08	2.3553e-06	6.4023	0.7176	1.8074	no
ENSG00000160818	GPATCH4	protein_coding	G-patch domain containing 4	2607.06	-2.4994	5.3207e-06	0.00011402	43.0269	4.464	3.1375	no
ENSG00000269352	PTOV1-AS2	antisense	NA	134.014	-2.4976	0.00026003	0.0039565	10.9309	0.958	2.585	no
ENSG00000102890	ELMO3	protein_coding	engulfment and cell motility 3	199.953	-2.4975	0.00033033	0.0049327	2.1588	0.2262	1.585	no
ENSG00000197208	SLC22A4	protein_coding	solute carrier family 22 member 4	520.921	-2.4951	9.0405e-08	2.4039e-06	8.0852	1.0278	2.1699	yes
ENSG00000203760	CENPW	protein_coding	centromere protein W	643.804	-2.4919	8.3554e-07	1.9981e-05	36.1819	4.5486	2.6245	yes
ENSG00000182272	B4GALNT4	protein_coding	beta-1,4-N-acetyl-galactosaminyltransferase 4	634.487	-2.4918	4.4749e-06	9.7248e-05	7.7498	0.7933	2.1699	yes
ENSG00000125148	MT2A	protein_coding	metallothionein 2A	78596.6	-2.4899	7.7097e-11	2.9022e-09	12487.5	1364.23	3.1936	yes
ENSG00000166840	GLYATL1	protein_coding	glycine-N-acyltransferase like 1	173.004	-2.4898	0.00044653	0.0064194	8.119	0.9132	2.1699	yes
ENSG00000187951	ARHGAP11B	protein_coding	OTU deubiquitinase 7A pseudogene	727.422	-2.4894	6.2808e-06	0.00013268	8.5483	1.1622	2.3219	yes
ENSG00000124160	NCOA5	protein_coding	nuclear receptor coactivator 5	1096.73	-2.4884	2.3394e-09	7.5937e-08	11.816	1.3064	2.7004	no
ENSG00000179958	DCTPP1	protein_coding	dCTP pyrophosphatase 1	1177.63	-2.4871	3.7094e-08	1.0345e-06	31.5304	3.4404	3.0444	no
ENSG00000162073	PAQR4	protein_coding	progestin and adipoQ receptor family member 4	607.218	-2.4846	2.6003e-07	6.5283e-06	6.6218	0.6609	2	yes
ENSG00000151014	NOCT	protein_coding	nocturnin	370.928	-2.4842	8.6024e-07	2.0489e-05	5.0432	0.6049	1.585	no
ENSG00000184115	RP13-1039J1.2	processed_transcript	glycosylphosphatidylinositol anchor attachment protein 1 homolog (yeast) pseudogene	150.219	-2.483	0.00052076	0.0073691	3.8661	0.2967	2.3219	no
ENSG00000048162	NOP16	protein_coding	NOP16 nucleolar protein	1498.1	-2.4816	1.4342e-06	3.3306e-05	45.1761	3.593	3.2016	no
ENSG00000103966	EHD4	protein_coding	EH domain containing 4	3931.25	-2.4808	4.3652e-09	1.3691e-07	15.8286	1.6603	2.5025	yes
ENSG00000164109	MAD2L1	protein_coding	mitotic arrest deficient 2 like 1	1268.05	-2.4782	3.3169e-08	9.3291e-07	16.2681	1.9901	2.5025	yes
ENSG00000237945	LINC00649	antisense	long intergenic non-protein coding RNA 649	314.971	-2.4678	0.0020372	0.024849	8.208	0.7569	2.1699	no
ENSG00000184992	BRI3BP	protein_coding	BRI3 binding protein	1185.47	-2.4674	2.5621e-07	6.4434e-06	4.3756	0.3949	2.3219	no
ENSG00000091651	ORC6	protein_coding	origin recognition complex subunit 6	808.7	-2.4659	3.8209e-08	1.0594e-06	13.5411	1.7276	2.3219	yes
ENSG00000074047	GLI2	protein_coding	GLI family zinc finger 2	958.284	-2.4646	0.0002787	0.0042211	7.3445	1.1203	2	yes
ENSG00000164035	EMCN	protein_coding	endomucin	73.5543	-2.4643	0.0081529	0.0799	3.4861	0.4369	2	no
ENSG00000247626	MARS2	protein_coding	methionyl-tRNA synthetase 2, mitochondrial	421.07	-2.4607	1.4482e-06	3.3605e-05	3.6657	0.4205	2.3219	no
ENSG00000101298	SNPH	protein_coding	syntaphilin	887.214	-2.4516	3.8882e-07	9.56e-06	4.4162	0.4339	2.3219	no
ENSG00000168906	MAT2A	protein_coding	methionine adenosyltransferase 2A	20541.9	-2.4444	9.1621e-07	2.1787e-05	246.232	23.7684	3.3045	no
ENSG00000103326	CAPN15	protein_coding	calpain 15	4102.44	-2.4418	9.1601e-10	3.0811e-08	26.5517	3.119	2.8074	no
ENSG00000128191	DGCR8	protein_coding	DGCR8 microprocessor complex subunit	2377.85	-2.4405	3.8759e-09	1.2234e-07	26.279	2.3099	3.1699	no
ENSG00000277701	RP11-734K23.9	lincRNA	NA	638.32	-2.4353	1.2145e-07	3.1838e-06	9.356	0.9005	2.3219	no
ENSG00000130695	CEP85	protein_coding	centrosomal protein 85	678.326	-2.4326	1.5154e-09	5.0289e-08	6.7703	0.7338	2	no
ENSG00000258947	TUBB3	protein_coding	tubulin beta 3 class III	7096.58	-2.4308	3.8587e-09	1.2195e-07	134.43	13.103	3.2695	yes
ENSG00000165304	MELK	protein_coding	maternal embryonic leucine zipper kinase	1619.35	-2.4275	3.5787e-11	1.3804e-09	20.8105	2.4112	2.8745	yes
ENSG00000137486	ARRB1	protein_coding	arrestin beta 1	1881.04	-2.4232	1.433e-07	3.7301e-06	13.1892	1.1931	2.8074	yes
ENSG00000117877	CD3EAP	protein_coding	RNA polymerase I subunit G	902.899	-2.4213	5.2944e-05	0.00095186	8.7597	1.0395	2.3219	yes
ENSG00000017483	SLC38A5	protein_coding	solute carrier family 38 member 5	2187.2	-2.421	2.3058e-09	7.4929e-08	60.7779	6.7631	2.9542	yes
[truncated: 486 more rows]

## Sheet: Patient 16 | Day 6 vs Day 3 | u
ENSEMBL ID	Gene name	Biotype	Description	Base mean	log2 FC	P value	Adjusted P value	Reference expression (TPM)	Sample expression (TPM)	Discrete abs(log2 FC)	Significance in at least two out of three patients?
[truncated: 253 more rows]

[truncated: 14 more sheets: Patient 16 | Day 6 vs Day 3 | d, Patient 16 | Day 9 vs Day 3 | u, Patient 16 | Day 9 vs Day 3 | d, Patient 16 | Day 16 vs Day 3 | , Sheet6, Patient 17 | Day 6 vs Day 3 | u, Patient 17 | Day 6 vs Day 3 | d, Patient 17 | Day 9 vs Day 3 | u, Patient 17 | Day 9 vs Day 3 | d, Patient 17 | Day 16 vs Day 3 | , Sheet7, Patient 17 | Day 28 vs Day 3 | , Sheet8, DESeq2 TPM values]
