# Supplementary material for: Metabolic and Transcriptional Changes across Osteogenic Differentiation of Mesenchymal Stromal Cells
Source: Bioengineering (Basel). 2021 Dec 10;8(12):208. doi: 10.3390/bioengineering8120208 (PMC8698318; doi:10.3390/bioengineering8120208)
Supplement: Supplementary file 1 [file bioengineering-08-00208-s001.zip › supplementary.table S10.xlsx]

## Sheet: TF up (orange dots)
ENSEMBL ID	Symbol	Description	log2 FC	mean log2 TPM	TPM (day = 28)	TPM (day = 3)
ENSG00000170345	FOS	Fos proto-oncogene, AP-1 transcription factor subunit	5.75489	4.74416	107	1
ENSG00000198963	RORB	RAR related orphan receptor B	4.58496	2.67807	23	0
ENSG00000126368	NR1D1	nuclear receptor subfamily 1 group D member 1	3.90689	3.29278	29	1
ENSG00000113916	BCL6	BCL6 transcription repressor	2.98089	6.19377	149	18
ENSG00000150907	FOXO1	forkhead box O1	2.90689	4.47249	44	5
ENSG00000175197	DDIT3	DNA damage inducible transcript 3	2.85798	5.17792	86	11
ENSG00000164920	OSR2	odd-skipped related transciption factor 2	2.70044	2.20163	12	1
ENSG00000116016	EPAS1	endothelial PAS domain protein 1	2.6746	5.80219	82	12
ENSG00000163884	KLF15	Kruppel like factor 15	2.58496	3.20163	23	3
ENSG00000140044	JDP2	Jun dimerization protein 2	2.56071	4.87774	58	9
ENSG00000221869	CEBPD	CCAAT enhancer binding protein delta	2.40336	6.40259	163	30
ENSG00000172216	CEBPB	CCAAT enhancer binding protein beta	2.34915	5.85798	106	20
ENSG00000204103	MAFB	MAF bZIP transcription factor B	2.32193	1.48543	4	0
ENSG00000109906	ZBTB16	zinc finger and BTB domain containing 16	2.1964	4.80735	54	11
ENSG00000102804	TSC22D1	TSC22 domain family member 1	1.94623	6.38198	157	40
ENSG00000132170	PPARG	peroxisome proliferator activated receptor gamma	1.926	3.53605	18	4
ENSG00000174738	NR1D2	nuclear receptor subfamily 1 group D member 2	1.848	3.40599	17	4
ENSG00000181690	PLAG1	PLAG1 zinc finger	1.80735	2.07039	6	1
ENSG00000126561	STAT5A	signal transducer and activator of transcription 5A	1.80735	3.7866	20	5
ENSG00000120837	NFYB	nuclear transcription factor Y subunit beta	1.69188	5.38543	41	12
ENSG00000119138	KLF9	Kruppel like factor 9	1.67807	4.75489	47	14
ENSG00000198839	ZNF277	zinc finger protein 277	1.58496	4.26303	32	10
ENSG00000164330	EBF1	EBF transcription factor 1	1.39232	3.88753	20	7
ENSG00000105516	DBP	D-box binding PAR bZIP transcription factor	1.32193	1.48543	4	1
ENSG00000125945	ZNF436	zinc finger protein 436	1.32193	2.07039	4	1

## Sheet: TF down (orange dots)
ENSEMBL ID	Symbol	Description	log2 FC	mean log2 TPM	TPM (day = 28)	TPM (day = 3)
ENSG00000101057	MYBL2	MYB proto-oncogene like 2	-3.70044	2.07039	0	12
ENSG00000111206	FOXM1	forkhead box M1	-3.05889	3.29278	2	24
ENSG00000101412	E2F1	E2F transcription factor 1	-2.80735	1.48543	0	6
ENSG00000130816	DNMT1	DNA methyltransferase 1	-2.27302	4.848	11	57
ENSG00000143867	OSR1	odd-skipped related transcription factor 1	-2.16993	2.848	1	8
ENSG00000197905	TEAD4	TEA domain transcription factor 4	-2.11548	3	2	12
ENSG00000175592	FOSL1	FOS like 1, AP-1 transcription factor subunit	-1.85798	4.73335	15	57
ENSG00000185697	MYBL1	MYB proto-oncogene like 1	-1.80735	2.76553	3	13
ENSG00000225614	ZNF469	zinc finger protein 469	-1.80735	1.926	1	6
ENSG00000137309	HMGA1	high mobility group AT-hook 1	-1.78338	6.70874	51	178
ENSG00000074047	GLI2	GLI family zinc finger 2	-1.58496	2.58496	2	8
ENSG00000149948	HMGA2	high mobility group AT-hook 2	-1.16993	4.91648	23	53

## Sheet: Metabolic genes up (green dots)
ENSEMBL ID	Symbol	Description	log2 FC	mean log2 TPM	TPM (day = 28)	TPM (day = 3)
ENSG00000196616	ADH1B	alcohol dehydrogenase 1B (class I), beta polypeptide	7.20457	6.74416	294	1
ENSG00000130203	APOE	apolipoprotein E	7.07682	6.848	269	1
ENSG00000189221	MAOA	monoamine oxidase A	6	4.21723	63	0
ENSG00000104267	CA2	carbonic anhydrase 2	5.64386	4.45943	99	1
ENSG00000131386	GALNT15	polypeptide N-acetylgalactosaminyltransferase 15	5.47573	5.78136	177	3
ENSG00000123689	G0S2	G0/G1 switch 2	5.45943	4.37851	43	0
ENSG00000135821	GLUL	glutamate-ammonia ligase	5.28494	9.53021	3118	79
ENSG00000094963	FMO2	flavin containing dimethylaniline monoxygenase 2	4.9542	3.65535	30	0
ENSG00000107317	PTGDS	prostaglandin D2 synthase	4.66838	6.32193	177	6
ENSG00000117594	HSD11B1	hydroxysteroid 11-beta dehydrogenase 1	4.64386	2.96347	24	0
ENSG00000169071	ROR2	receptor tyrosine kinase like orphan receptor 2	4.52356	3.26303	22	0
ENSG00000211445	GPX3	glutathione peroxidase 3	4.24793	5.47897	75	3
ENSG00000007933	FMO3	flavin containing dimethylaniline monoxygenase 3	4.16993	4.29278	53	2
ENSG00000138449	SLC40A1	solute carrier family 40 member 1	4	2.43296	15	0
ENSG00000135929	CYP27A1	cytochrome P450 family 27 subfamily A member 1	3.9542	3.70044	30	1
ENSG00000120875	DUSP4	dual specificity phosphatase 4	3.70044	3.03562	25	1
ENSG00000115252	PDE1A	phosphodiesterase 1A	3.70044	3.10434	25	1
ENSG00000273259	SERPINA3	novel protein	3.64386	4	24	1
ENSG00000143507	DUSP10	dual specificity phosphatase 10	3.61891	4.81762	85	6
ENSG00000115919	KYNU	kynureninase	3.58496	2.96347	23	1
ENSG00000179593	ALOX15B	arachidonate 15-lipoxygenase type B	3.58496	3.29278	23	1
ENSG00000099998	GGT5	gamma-glutamyltransferase 5	3.57212	8.07361	558	46
ENSG00000004799	PDK4	pyruvate dehydrogenase kinase 4	3.52356	4.16993	45	3
ENSG00000133048	CHI3L1	chitinase 3 like 1	3.33498	8.04002	110	10
ENSG00000003989	SLC7A2	solute carrier family 7 member 2	3.32193	1.926	9	0
ENSG00000108984	MAP2K6	mitogen-activated protein kinase kinase 6	3.16993	2.1375	8	0
ENSG00000151692	RNF144A	ring finger protein 144A	3.16993	3.40599	17	1
ENSG00000130066	SAT1	spermidine/spermine N1-acetyltransferase 1	3.12642	8.37764	881	100
ENSG00000165029	ABCA1	ATP binding cassette subfamily A member 1	2.80735	3.03562	13	1
ENSG00000138207	RBP4	retinol binding protein 4	2.66297	3.3505	18	2
ENSG00000067113	PLPP1	phospholipid phosphatase 1	2.66297	5.6837	113	17
ENSG00000143819	EPHX1	epoxide hydrolase 1	2.5615	6.66391	182	30
ENSG00000115525	ST3GAL5	ST3 beta-galactoside alpha-2,3-sialyltransferase 5	2.5025	2.80735	16	2
ENSG00000111058	ACSS3	acyl-CoA synthetase short chain family member 3	2.5025	3.1375	16	2
ENSG00000087086	FTL	ferritin light chain	2.45368	11.7733	5258	959
ENSG00000071967	CYBRD1	cytochrome b reductase 1	2.43857	7.26115	308	56
ENSG00000145284	SCD5	stearoyl-CoA desaturase 5	2.42626	4.29278	42	7
ENSG00000117643	MAN1C1	mannosidase alpha class 1C member 1	2.32193	1.76553	4	0
ENSG00000124212	PTGIS	prostaglandin I2 synthase	2.32193	3.51096	9	1
ENSG00000162496	DHRS3	dehydrogenase/reductase 3	2.32193	3.3505	9	1
ENSG00000084674	APOB	apolipoprotein B	2.32193	1.926	4	0
ENSG00000150457	LATS2	large tumor suppressor kinase 2	2.25873	4.83794	66	13
ENSG00000150540	HNMT	histamine N-methyltransferase	2.23879	6.1334	117	24
ENSG00000112096	SOD2	superoxide dismutase 2	2.1936	6.98641	214	46
ENSG00000134853	PDGFRA	platelet derived growth factor receptor alpha	2.17608	7.09381	234	51
ENSG00000035664	DAPK2	death associated protein kinase 2	2.16993	2.96347	8	1
ENSG00000131979	GCH1	GTP cyclohydrolase 1	2.16993	2.07039	8	1
ENSG00000107968	MAP3K8	mitogen-activated protein kinase kinase kinase 8	2.16993	2.53605	8	1
ENSG00000137869	CYP19A1	cytochrome P450 family 19 subfamily A member 1	2.08746	3	16	3
ENSG00000100344	PNPLA3	patatin like phospholipase domain containing 3	2.04439	4.16993	32	7
ENSG00000007944	MYLIP	myosin regulatory light chain interacting protein	2	1.58496	3	0
ENSG00000056998	GYG2	glycogenin 2	2	1.48543	3	0
ENSG00000121361	KCNJ8	potassium inwardly rectifying channel subfamily J member 8	2	3.20163	15	3
ENSG00000197442	MAP3K5	mitogen-activated protein kinase kinase kinase 5	2	4	27	6
ENSG00000116675	DNAJC6	DnaJ heat shock protein family (Hsp40) member C6	2	3.58496	19	4
ENSG00000137193	PIM1	Pim-1 proto-oncogene, serine/threonine kinase	2	3.53605	15	3
ENSG00000173598	NUDT4	nudix hydrolase 4	1.98966	6.20555	138	34
ENSG00000243056	EIF4EBP3	eukaryotic translation initiation factor 4E binding protein 3	1.90689	3.20163	14	3
ENSG00000151726	ACSL1	acyl-CoA synthetase long chain family member 1	1.89947	6.95884	193	51
ENSG00000147576	ADHFE1	alcohol dehydrogenase iron containing 1	1.87447	2.48543	10	2
ENSG00000064655	EYA2	EYA transcriptional coactivator and phosphatase 2	1.83007	4.01792	31	8
ENSG00000162733	DDR2	discoidin domain receptor tyrosine kinase 2	1.80023	5.98185	100	28
ENSG00000065534	MYLK	myosin light chain kinase	1.7922	6.12928	141	40
ENSG00000047936	ROS1	ROS proto-oncogene 1, receptor tyrosine kinase	1.70044	3.10434	12	3
ENSG00000167996	FTH1	ferritin heavy chain 1	1.63846	12.6811	9943	3193
ENSG00000120899	PTK2B	protein tyrosine kinase 2 beta	1.63227	4.59694	30	9
ENSG00000048392	RRM2B	ribonucleotide reductase regulatory TP53 inducible subunit M2B	1.61471	4.926	48	15
ENSG00000062282	DGAT2	diacylglycerol O-acyltransferase 2	1.58496	2.58496	8	2
ENSG00000110013	SIAE	sialic acid acetylesterase	1.58496	4.7866	35	11
ENSG00000188906	LRRK2	leucine rich repeat kinase 2	1.58496	1.67807	5	1
ENSG00000185250	PPIL6	peptidylprolyl isomerase like 6	1.58496	2	5	1
ENSG00000173482	PTPRM	protein tyrosine phosphatase receptor type M	1.48829	5.92125	100	35
ENSG00000171105	INSR	insulin receptor	1.41504	2.1375	7	2
ENSG00000076258	FMO4	flavin containing dimethylaniline monoxygenase 4	1.32193	2.26303	4	1
ENSG00000174080	CTSF	cathepsin F	1.32193	3.98185	14	5
ENSG00000100979	PLTP	phospholipid transfer protein	1.32193	5.32912	44	17
ENSG00000114480	GBE1	1,4-alpha-glucan branching enzyme 1	1.3055	6.21335	130	52
ENSG00000161513	FDXR	ferredoxin reductase	1.27302	4.62059	28	11
ENSG00000145675	PIK3R1	phosphoinositide-3-kinase regulatory subunit 1	1.24793	4.48543	37	15
ENSG00000170271	FAXDC2	fatty acid hydroxylase domain containing 2	1.22239	3.51096	13	5
ENSG00000144724	PTPRG	protein tyrosine phosphatase receptor type G	1.16993	5.2854	62	27

## Sheet: Metabolic genes down (green dot
ENSEMBL ID	Symbol	Description	log2 FC	mean log2 TPM	TPM (day = 28)	TPM (day = 3)
ENSG00000171848	RRM2	ribonucleotide reductase regulatory subunit M2	-4.55459	3.96347	1	46
ENSG00000127564	PKMYT1	protein kinase, membrane associated tyrosine/threonine 1	-4.16993	2.53605	0	17
ENSG00000175063	UBE2C	ubiquitin conjugating enzyme E2 C	-3.9386	3.96347	2	45
ENSG00000167900	TK1	thymidine kinase 1	-3.80735	3.94486	2	41
ENSG00000178999	AURKB	aurora kinase B	-3.70044	3.07039	1	25
ENSG00000167772	ANGPTL4	angiopoietin like 4	-3.68758	7.35579	25	334
ENSG00000166851	PLK1	polo like kinase 1	-3.64386	3.16993	1	24
ENSG00000017483	SLC38A5	solute carrier family 38 member 5	-3.60486	5.12102	5	72
ENSG00000170312	CDK1	cyclin dependent kinase 1	-3.5025	3.72247	2	33
ENSG00000100526	CDKN3	cyclin dependent kinase inhibitor 3	-3.39232	3.26303	1	20
ENSG00000087586	AURKA	aurora kinase A	-3.32193	2.96347	1	19
ENSG00000168078	PBK	PDZ binding kinase	-3.32193	2.926	1	19
ENSG00000139629	GALNT6	polypeptide N-acetylgalactosaminyltransferase 6	-3.16993	3	1	17
ENSG00000206190	ATP10A	ATPase phospholipid transporting 10A (putative)	-3.05889	3.37851	2	24
ENSG00000169679	BUB1	BUB1 mitotic checkpoint serine/threonine kinase	-2.90689	2.53605	1	14
ENSG00000142731	PLK4	polo like kinase 4	-2.80735	2.43296	1	13
ENSG00000156970	BUB1B	BUB1 mitotic checkpoint serine/threonine kinase B	-2.80735	2.37851	1	13
ENSG00000079462	PAFAH1B3	platelet activating factor acetylhydrolase 1b catalytic subunit 3	-2.70044	2.72247	1	12
ENSG00000165304	MELK	maternal embryonic leucine zipper kinase	-2.64386	3.43296	3	24
ENSG00000142949	PTPRF	protein tyrosine phosphatase receptor type F	-2.58496	4	5	35
ENSG00000164045	CDC25A	cell division cycle 25A	-2.58496	1.37851	0	5
ENSG00000198805	PNP	purine nucleoside phosphorylase	-2.53051	4.70044	8	51
ENSG00000173638	SLC19A1	solute carrier family 19 member 1	-2.5025	3.07039	2	16
ENSG00000135318	NT5E	5'-nucleotidase ecto	-2.5025	5.99548	23	135
ENSG00000112742	TTK	TTK protein kinase	-2.45943	2.20163	1	10
ENSG00000122966	CIT	citron rho-interacting serine/threonine kinase	-2.45943	2.37851	1	10
ENSG00000108106	UBE2S	ubiquitin conjugating enzyme E2 S	-2.42999	5.52982	17	96
ENSG00000164687	FABP5	fatty acid binding protein 5	-2.33703	6.61471	37	191
ENSG00000157680	DGKI	diacylglycerol kinase iota	-2.32193	2.26303	1	9
ENSG00000168067	MAP4K2	mitogen-activated protein kinase kinase kinase kinase 2	-2.32193	2.58496	1	9
ENSG00000176890	TYMS	thymidylate synthetase	-2.29768	4.81762	11	58
ENSG00000167114	SLC27A4	solute carrier family 27 member 4	-2.24793	3.3505	3	18
ENSG00000176454	LPCAT4	lysophosphatidylcholine acyltransferase 4	-2.23266	4.848	9	46
ENSG00000077152	UBE2T	ubiquitin conjugating enzyme E2 T	-2.22239	2.80735	2	13
ENSG00000109685	WHSC1	nuclear receptor binding SET domain protein 2	-2.20945	4.16993	7	36
ENSG00000183048	SLC25A10	solute carrier family 25 member 10	-2.16993	2.26303	1	8
ENSG00000169169	CPT1C	carnitine palmitoyltransferase 1C	-2.16993	2.58496	1	8
ENSG00000117650	NEK2	NIMA related kinase 2	-2.16993	2.07039	1	8
ENSG00000097046	CDC7	cell division cycle 7	-2.16993	2.32193	1	8
ENSG00000126562	WNK4	WNK lysine deficient protein kinase 4	-2.16993	1.926	1	8
ENSG00000276657	Not available	pyrroline-5-carboxylate reductase 3	-2.11548	2.76553	2	12
ENSG00000178921	PFAS	phosphoribosylformylglycinamidine synthase	-2.05889	3.76553	5	24
ENSG00000147155	EBP	EBP cholestenol delta-isomerase	-2.04439	4.26303	7	32
ENSG00000177084	POLE	DNA polymerase epsilon, catalytic subunit	-2.04439	4.07039	7	32
ENSG00000100522	GNPNAT1	glucosamine-phosphate N-acetyltransferase 1	-2.03395	5.41954	20	85
ENSG00000184207	PGP	phosphoglycolate phosphatase	-2	2.72247	2	11
ENSG00000162630	B3GALT2	beta-1,3-galactosyltransferase 2	-2	3	2	11
ENSG00000106462	EZH2	enhancer of zeste 2 polycomb repressive complex 2 subunit	-2	2.53605	2	11
ENSG00000132382	MYBBP1A	MYB binding protein 1a	-1.9386	4.82782	11	45
ENSG00000074416	MGLL	monoglyceride lipase	-1.90689	4.59694	11	44
ENSG00000188191	PRKAR1B	protein kinase cAMP-dependent type I regulatory subunit beta	-1.87447	2.88753	2	10
ENSG00000112759	SLC29A1	solute carrier family 29 member 1 (Augustine blood group)	-1.87447	3.3505	5	21
ENSG00000149782	PLCB3	phospholipase C beta 3	-1.87447	4.15381	8	32
ENSG00000125454	SLC25A19	solute carrier family 25 member 19	-1.87447	2.80735	2	10
ENSG00000135454	B4GALNT1	beta-1,4-N-acetyl-galactosaminyltransferase 1	-1.80735	1.67807	1	6
ENSG00000160326	SLC2A6	solute carrier family 2 member 6	-1.80735	2.07039	1	6
ENSG00000183023	SLC8A1	solute carrier family 8 member A1	-1.80735	2.926	3	13
ENSG00000014138	POLA2	DNA polymerase alpha 2, accessory subunit	-1.76553	3.10434	4	16
ENSG00000197208	SLC22A4	solute carrier family 22 member 4	-1.73697	2.80735	2	9
ENSG00000148677	ANKRD1	ankyrin repeat domain 1	-1.70328	5.87774	38	126
ENSG00000154027	AK5	adenylate kinase 5	-1.68806	3.88753	8	28
ENSG00000100749	VRK1	VRK serine/threonine kinase 1	-1.67807	3.1375	4	15
ENSG00000084774	CAD	carbamoyl-phosphate synthetase 2, aspartate transcarbamylase, and dihydroorotase	-1.66297	4.59694	11	37
ENSG00000134013	LOXL2	lysyl oxidase like 2	-1.65055	6.36107	42	134
ENSG00000139278	GLIPR1	GLI pathogenesis related 1	-1.65025	6.10434	35	112
ENSG00000163659	TIPARP	TCDD inducible poly(ADP-ribose) polymerase	-1.6477	4.51096	14	46
ENSG00000167601	AXL	AXL receptor tyrosine kinase	-1.61382	5.81762	32	100
ENSG00000276043	UHRF1	ubiquitin like with PHD and ring finger domains 1	-1.58496	2.32193	2	8
ENSG00000101945	SUV39H1	suppressor of variegation 3-9 homolog 1	-1.58496	1.67807	1	5
ENSG00000115687	PASK	PAS domain containing serine/threonine kinase	-1.58496	1.76553	1	5
ENSG00000133216	EPHB2	EPH receptor B2	-1.58496	2.43296	2	8
ENSG00000067057	PFKP	phosphofructokinase, platelet	-1.56294	5.926	43	129
ENSG00000144583	44259	membrane associated ring-CH-type finger 4	-1.45943	2.48543	3	10
ENSG00000152127	MGAT5	alpha-1,6-mannosylglycoprotein 6-beta-N-acetylglucosaminyltransferase	-1.44057	3.63227	6	18
ENSG00000198668	CALM1	calmodulin 1	-1.40129	7.84549	144	382
ENSG00000077264	PAK3	p21 (RAC1) activated kinase 3	-1.32193	1.58496	1	4
ENSG00000078269	SYNJ2	synaptojanin 2	-1.32193	3.03562	5	14
ENSG00000275342	SGK223	PEAK1 related, kinase-activating pseudokinase 1	-1.32193	1.76553	1	4
ENSG00000182272	B4GALNT4	beta-1,4-N-acetyl-galactosaminyltransferase 4	-1.32193	1.67807	1	4
ENSG00000197594	ENPP1	ectonucleotide pyrophosphatase/phosphodiesterase 1	-1.05063	3.76553	13	28
ENSG00000169764	UGP2	UDP-glucose pyrophosphorylase 2	-1.04532	7.79701	187	387

## Sheet: Other genes up (black dots)
ENSEMBL ID	Symbol	Description	log2 FC	mean log2 TPM	TPM (day = 28)	TPM (day = 3)
ENSG00000104435	STMN2	stathmin 2	7.9542	5.71149	247	0
ENSG00000162706	CADM3	cell adhesion molecule 3	6.68883	8.9507	1237	11
ENSG00000106538	RARRES2	retinoic acid receptor responder 2	6.58496	4.59694	95	0
ENSG00000101938	CHRDL1	chordin like 1	6.56224	7.1375	566	5
ENSG00000137745	MMP13	matrix metallopeptidase 13	6.31288	5.24793	158	1
ENSG00000112796	ENPP5	ectonucleotide pyrophosphatase/phosphodiesterase family member 5	6.2854	4.21723	77	0
ENSG00000137673	MMP7	matrix metallopeptidase 7	6.10852	5.39917	137	1
ENSG00000167244	IGF2	insulin like growth factor 2	6.10294	8.926	1030	14
ENSG00000149131	SERPING1	serpin family G member 1	6.08321	7.28355	338	4
ENSG00000115602	IL1RL1	interleukin 1 receptor like 1	6	3.82782	63	0
ENSG00000257017	HP	haptoglobin	5.61471	3.926	48	0
ENSG00000213088	ACKR1	atypical chemokine receptor 1 (Duffy blood group)	5.47032	5.96347	132	2
ENSG00000197766	CFD	complement factor D	5.45943	5.06178	87	1
ENSG00000274619	Not available	complement factor D	5.45943	5.06178	87	1
ENSG00000165507	C10orf10	DEPP1 autophagy regulator	5.27479	6.53916	270	6
ENSG00000171951	SCG2	secretogranin II	5.04439	4.87774	65	1
ENSG00000234459	AC002064.4	novel transcript	5.02237	4.21723	64	1
ENSG00000189058	APOD	apolipoprotein D	4.90087	7.20359	238	7
ENSG00000155307	SAMSN1	SAM domain, SH3 domain and nuclear localization signals 1	4.85798	2.76553	28	0
ENSG00000170873	MTSS1	MTSS I-BAR domain containing 1	4.85798	4.21723	57	1
ENSG00000116678	LEPR	leptin receptor	4.70966	6.87283	313	11
ENSG00000064205	WISP2	cellular communication network factor 5	4.70044	5.21723	51	1
ENSG00000173432	SAA1	serum amyloid A1	4.6893	5.27798	128	4
ENSG00000112936	C7	complement C7	4.58496	3.1375	23	0
ENSG00000256001	RP11-575F12.2	novel transcript	4.55459	3.65535	46	1
ENSG00000200033	RNU6-403P	RNA, U6 small nuclear 403, pseudogene	4.55459	3.58496	46	1
ENSG00000134339	SAA2	serum amyloid A2	4.52356	4.66676	68	2
ENSG00000108551	RASD1	ras related dexamethasone induced 1	4.52356	5.08746	45	1
ENSG00000122420	PTGFR	prostaglandin F receptor	4.39232	5.30012	83	3
ENSG00000232679	RP11-400N13.3	long intergenic non-protein coding RNA 1705	4.36923	4.05311	61	2
ENSG00000116690	PRG4	proteoglycan 4	4.32193	2.58496	19	0
ENSG00000157514	TSC22D3	TSC22 domain family member 3	4.29235	8.61545	1351	68
ENSG00000156804	FBXO32	F-box protein 32	4.2676	7.62352	442	22
ENSG00000161544	CYGB	cytoglobin	4.24793	4.75489	56	2
ENSG00000121552	CSTA	cystatin A	4.24793	4.20163	37	1
ENSG00000163520	FBLN2	fibulin 2	4.16993	2.48543	17	0
ENSG00000124749	COL21A1	collagen type XXI alpha 1 chain	4.12928	3.70044	34	1
ENSG00000249242	TMEM150C	transmembrane protein 150C	4.12928	3.56071	34	1
ENSG00000134363	FST	follistatin	4.08746	4.30743	50	2
ENSG00000129757	CDKN1C	cyclin dependent kinase inhibitor 1C	4.08746	2.37851	16	0
ENSG00000243440	AF165138.7	Not available	4.08746	2.1375	16	0
ENSG00000140285	FGF7	fibroblast growth factor 7	4.01213	8.00562	596	36
ENSG00000225670	CADM3-AS1	CADM3 antisense RNA 1	4	3	15	0
ENSG00000182853	VMO1	vitelline membrane outer layer 1 homolog	4	3.23266	15	0
ENSG00000102802	MEDAG	mesenteric estrogen dependent adipogenesis	4	5.94486	175	10
ENSG00000154153	FAM134B	reticulophagy regulator 1	3.90689	2.43296	14	0
ENSG00000103196	CRISPLD2	cysteine rich secretory protein LCCL domain containing 2	3.90689	6.07039	179	11
ENSG00000250337	LINC01021	p53 upregulated regulator of p53 levels	3.8413	4.18587	42	2
ENSG00000164188	RANBP3L	RAN binding protein 3 like	3.83289	4.53605	56	3
ENSG00000238042	RP11-815M8.1	long intergenic non-protein coding RNA 2257	3.80735	2.1375	13	0
ENSG00000258545	RHOXF1-AS1	RHOXF1 antisense RNA 1	3.7866	4.70044	68	4
ENSG00000130303	BST2	bone marrow stromal cell antigen 2	3.75489	3.53605	26	1
ENSG00000222552	RNA5SP60	RNA, 5S ribosomal pseudogene 60	3.70044	3.03562	12	0
ENSG00000259675	RP11-507B12.1	novel transcript	3.70044	1.76553	12	0
ENSG00000118971	CCND2	cyclin D2	3.70044	2.43296	12	0
ENSG00000173918	C1QTNF1	C1q and TNF related 1	3.67243	4.33628	50	3
ENSG00000157150	TIMP4	TIMP metallopeptidase inhibitor 4	3.64386	4.63227	49	3
ENSG00000136859	ANGPTL2	angiopoietin like 2	3.60881	4.58496	60	4
ENSG00000145358	DDIT4L	DNA damage inducible transcript 4 like	3.58496	3.8679	11	0
ENSG00000175899	A2M	alpha-2-macroglobulin	3.58496	1.926	11	0
ENSG00000227925	RP11-191N8.2	long intergenic non-protein coding RNA 1655	3.58496	1.848	11	0
ENSG00000041353	RAB27B	RAB27B, member RAS oncogene family	3.58496	3.80735	35	2
ENSG00000265972	TXNIP	thioredoxin interacting protein	3.55897	8.77742	659	55
ENSG00000126860	EVI2A	ecotropic viral integration site 2A	3.54432	4.27798	34	2
ENSG00000106823	ECM2	extracellular matrix protein 2	3.49643	5.34341	78	6
ENSG00000029559	IBSP	integrin binding sialoprotein	3.45943	2.53605	10	0
ENSG00000169031	COL4A3	collagen type IV alpha 3 chain	3.45943	2	10	0
ENSG00000196136	SERPINA3	serpin family A member 3	3.45943	2.848	10	0
ENSG00000081052	COL4A4	collagen type IV alpha 4 chain	3.45943	2.1375	10	0
ENSG00000185149	NPY2R	neuropeptide Y receptor Y2	3.45943	1.848	10	0
ENSG00000152154	TMEM178A	transmembrane protein 178A	3.45943	2.926	21	1
ENSG00000168461	RAB31	RAB31, member RAS oncogene family	3.4361	6.19771	183	16
ENSG00000250722	SEPP1	selenoprotein P	3.39232	3.72247	20	1
ENSG00000164112	TMEM155	small integral membrane protein 43	3.36923	3.74416	30	2
ENSG00000255364	RP11-94A24.1	smooth muscle induced lncRNA, enhancer of proliferation	3.3599	6.41278	153	14
ENSG00000001561	ENPP4	ectonucleotide pyrophosphatase/phosphodiesterase 4	3.32193	3.32193	29	2
ENSG00000179869	ABCA13	ATP binding cassette subfamily A member 13	3.32193	1.58496	9	0
ENSG00000137880	GCHFR	GTP cyclohydrolase I feedback regulator	3.32193	4.01792	29	2
ENSG00000143196	DPT	dermatopontin	3.26303	4.18587	47	4
ENSG00000182752	PAPPA	pappalysin 1	3.23266	4.43296	46	4
ENSG00000106819	ASPN	asporin	3.22239	4.08746	27	2
ENSG00000006016	CRLF1	cytokine receptor like factor 1	3.21842	5.41278	120	12
ENSG00000223953	C1QTNF5	C1q and TNF related 5	3.20945	4.94486	73	7
ENSG00000148926	ADM	adrenomedullin	3.20235	7.76022	404	43
ENSG00000130513	GDF15	growth differentiation factor 15	3.16993	4.32193	44	4
ENSG00000109819	PPARGC1A	PPARG coactivator 1 alpha	3.16993	1.67807	8	0
ENSG00000198732	SMOC1	SPARC related modular calcium binding 1	3.16993	4.20163	35	3
ENSG00000105792	CFAP69	cilia and flagella associated protein 69	3.12928	3.72247	34	3
ENSG00000105696	TMEM59L	transmembrane protein 59 like	3.11548	3.07039	25	2
ENSG00000165899	OTOGL	otogelin like	3.08746	3.03562	16	1
ENSG00000270885	RASL10B	RAS like family 10 member B	3.08746	3.03562	16	1
ENSG00000205221	VIT	vitrin	3.05889	4.16993	24	2
ENSG00000124882	EREG	epiregulin	3.05889	2.76553	24	2
ENSG00000139112	GABARAPL1	GABA type A receptor associated protein like 1	3.02748	5.60288	105	12
ENSG00000175426	PCSK1	proprotein convertase subtilisin/kexin type 1	3	1.76553	7	0
ENSG00000118898	PPL	periplakin	3	3.10434	15	1
ENSG00000111341	MGP	matrix Gla protein	3	2	7	0
ENSG00000267647	MAP1LC3P	microtubule associated protein 1 light chain 3 pseudogene	3	1.58496	7	0
ENSG00000101230	ISM1	isthmin 1	3	1.67807	7	0
ENSG00000278266	RP11-575F12.3	novel transcript	3	1.48543	7	0
ENSG00000160161	CILP2	cartilage intermediate layer protein 2	3	1.67807	7	0
ENSG00000077942	FBLN1	fibulin 1	2.97532	10.0444	1564	198
ENSG00000185885	IFITM1	interferon induced transmembrane protein 1	2.96683	7.16792	171	21
ENSG00000064886	CHI3L2	chitinase 3 like 2	2.9386	3.58496	22	2
ENSG00000164949	GEM	GTP binding protein overexpressed in skeletal muscle	2.90689	3.67807	29	3
ENSG00000196562	SULF2	sulfatase 2	2.89308	5.79701	51	6
ENSG00000091129	NRCAM	neuronal cell adhesion molecule	2.89308	4.39232	51	6
ENSG00000122861	PLAU	plasminogen activator, urokinase	2.89202	6.98185	192	25
ENSG00000187288	CIDEC	cell death inducing DFFA like effector c	2.88264	5.05311	58	7
ENSG00000169891	REPS2	RALBP1 associated Eps domain containing 2	2.87447	3.51096	21	2
ENSG00000180447	GAS1	growth arrest specific 1	2.86716	6.76818	196	26
ENSG00000120594	PLXDC2	plexin domain containing 2	2.86507	4.49825	50	6
ENSG00000198624	CCDC69	coiled-coil domain containing 69	2.85798	3.96347	28	3
ENSG00000125730	C3	complement C3	2.848	5.21723	35	4
ENSG00000176658	MYO1D	myosin ID	2.81876	5.60881	126	17
ENSG00000271447	MMP28	matrix metallopeptidase 28	2.80735	2.48543	6	0
ENSG00000028137	TNFRSF1B	TNF receptor superfamily member 1B	2.80735	2	6	0
ENSG00000173376	NDNF	neuron derived neurotrophic factor	2.80735	3.7866	20	2
ENSG00000104953	TLE6	TLE family member 6, subcortical maternal complex member	2.80735	1.76553	6	0
ENSG00000145287	PLAC8	placenta associated 8	2.80735	2.63227	13	1
ENSG00000238840	U8	U8 small nucleolar RNA	2.80735	2.1375	6	0
ENSG00000160801	PTH1R	parathyroid hormone 1 receptor	2.80735	1.37851	6	0
ENSG00000162692	VCAM1	vascular cell adhesion molecule 1	2.80735	2.76553	13	1
ENSG00000078114	NEBL	nebulette	2.80735	1.848	6	0
ENSG00000189184	PCDH18	protocadherin 18	2.79141	5.49185	89	12
ENSG00000166482	MFAP4	microfibril associated protein 4	2.76553	4.26303	33	4
ENSG00000107738	C10orf54	V-set immunoregulatory receptor	2.75132	5.67807	100	14
ENSG00000114120	SLC25A36	solute carrier family 25 member 36	2.71187	6.42962	189	28
ENSG00000027697	IFNGR1	interferon gamma receptor 1	2.70487	6.27053	162	24
ENSG00000175155	YPEL2	yippee like 2	2.70044	3.51096	25	3
ENSG00000154188	ANGPT1	angiopoietin 1	2.69426	6.72792	232	35
ENSG00000159403	C1R	complement C1r	2.69032	6.81762	141	21
ENSG00000176046	NUPR1	nuclear protein 1, transcriptional regulator	2.68243	6.81762	198	30
ENSG00000185585	OLFML2A	olfactomedin like 2A	2.67807	3.926	31	4
ENSG00000102760	RGCC	regulator of cell cycle	2.66706	6.52669	234	36
ENSG00000111859	NEDD9	neural precursor cell expressed, developmentally down-regulated 9	2.66297	5.79701	132	20
ENSG00000011465	DCN	decorin	2.66107	11.254	4319	682
ENSG00000196569	LAMA2	laminin subunit alpha 2	2.61143	4.51096	54	8
ENSG00000112769	LAMA4	laminin subunit alpha 4	2.6009	6.18982	90	14
ENSG00000185432	METTL7A	methyltransferase like 7A	2.59904	5.84298	102	16
ENSG00000118432	CNR1	cannabinoid receptor 1	2.58496	1.26303	5	0
ENSG00000104043	ATP8B4	ATPase phospholipid transporting 8B4 (putative)	2.58496	1.926	5	0
ENSG00000101347	SAMHD1	SAM and HD domain containing deoxynucleoside triphosphate triphosphohydrolase 1	2.58496	3.90689	23	3
ENSG00000154736	ADAMTS5	ADAM metallopeptidase with thrombospondin type 1 motif 5	2.58496	2.32193	5	0
ENSG00000245812	RP11-175K6.1	long intergenic non-protein coding RNA 2202	2.58496	4.53605	35	5
ENSG00000166510	CCDC68	coiled-coil domain containing 68	2.58496	4.80735	71	11
ENSG00000099282	TSPAN15	tetraspanin 15	2.58496	1.48543	5	0
ENSG00000111913	FAM65B	RHO family interacting cell polarization regulator 2	2.58496	1.1375	5	0
ENSG00000129988	LBP	lipopolysaccharide binding protein	2.58496	1.76553	5	0
ENSG00000266995	RP11-703I16.3	telomeric repeat binding factor (NIMA-interacting) 1 (TERF1) pseudogene	2.58496	1.926	5	0
ENSG00000160808	MYL3	myosin light chain 3	2.58496	1.1375	5	0
ENSG00000169242	EFNA1	ephrin A1	2.58496	1.37851	5	0
ENSG00000164056	SPRY1	sprouty RTK signaling antagonist 1	2.56071	5.16189	58	9
ENSG00000154319	FAM167A	family with sequence similarity 167 member A	2.53605	3.56071	28	4
ENSG00000184500	PROS1	protein S	2.53605	4.05311	28	4
ENSG00000139329	LUM	lumican	2.51229	8.13853	541	94
ENSG00000196549	MME	membrane metalloendopeptidase	2.51223	9.19229	1140	199
ENSG00000184371	CSF1	colony stimulating factor 1	2.5025	6.80219	169	29
ENSG00000259367	RP11-815J21.4	novel transcript, antisense to AKAP13	2.5025	2.72247	16	2
ENSG00000122035	RASL11A	RAS like family 11 member A	2.45943	3.20163	10	1
ENSG00000196352	CD55	CD55 molecule (Cromer blood group)	2.44478	4.33628	48	8
ENSG00000166292	TMEM100	transmembrane protein 100	2.43296	3.94486	26	4
ENSG00000182326	C1S	complement C1s	2.42146	7.47573	299	55
ENSG00000215483	LINC00598	long intergenic non-protein coding RNA 598	2.41504	3.10434	15	2
ENSG00000225511	LINC00475	long intergenic non-protein coding RNA 475	2.41504	4.32193	31	5
ENSG00000182118	FAM89A	family with sequence similarity 89 member A	2.39232	3.43296	20	3
ENSG00000060718	COL11A1	collagen type XI alpha 1 chain	2.38633	8.00675	480	91
ENSG00000132386	SERPINF1	serpin family F member 1	2.38486	9.07307	819	156
ENSG00000174804	FZD4	frizzled class receptor 4	2.32193	3.56071	24	4
ENSG00000162998	FRZB	frizzled related protein	2.32193	1.58496	4	0
ENSG00000124249	KCNK15	potassium two pore domain channel subfamily K member 15	2.32193	1.76553	4	0
ENSG00000114796	KLHL24	kelch like family member 24	2.32193	4.03562	29	5
ENSG00000049246	PER3	period circadian regulator 3	2.32193	1.37851	4	0
ENSG00000115604	IL18R1	interleukin 18 receptor 1	2.32193	1.37851	4	0
ENSG00000169218	RSPO1	R-spondin 1	2.32193	1.48543	4	0
ENSG00000104213	PDGFRL	platelet derived growth factor receptor like	2.32193	1.58496	4	0
ENSG00000162645	GBP2	guanylate binding protein 2	2.32193	3.58496	14	2
ENSG00000115590	IL1R2	interleukin 1 receptor type 2	2.32193	1.76553	4	0
ENSG00000271216	LINC01050	long intergenic non-protein coding RNA 1050	2.32193	1.67807	4	0
ENSG00000133321	RARRES3	phospholipase A and acyltransferase 4	2.32193	3.23266	9	1
ENSG00000163975	MELTF	melanotransferrin	2.32193	3.56071	14	2
ENSG00000151892	GFRA1	GDNF family receptor alpha 1	2.32193	2.48543	4	0
ENSG00000143341	HMCN1	hemicentin 1	2.32193	2.32193	9	1
ENSG00000174697	LEP	leptin	2.32193	2	4	0
ENSG00000137975	CLCA2	chloride channel accessory 2	2.32193	1.58496	4	0
ENSG00000065717	TLE2	TLE family member 2, transcriptional corepressor	2.32193	3.98185	29	5
ENSG00000127863	TNFRSF19	TNF receptor superfamily member 19	2.30485	5.39917	83	16
ENSG00000085117	CD82	CD82 molecule	2.30319	6.50144	152	30
ENSG00000259649	RP11-351M8.1	novel transcript, antisense to CEMIP	2.28011	4.6893	33	6
ENSG00000119729	RHOQ	ras homolog family member Q	2.25096	5.76553	118	24
ENSG00000166289	PLEKHF1	pleckstrin homology and FYVE domain containing 1	2.24793	3.65535	18	3
ENSG00000116667	C1orf21	chromosome 1 open reading frame 21	2.23704	3.90689	32	6
ENSG00000251301	RP11-81H14.2	long intergenic non-protein coding RNA 2384	2.22239	2.88753	13	2
ENSG00000130766	SESN2	sestrin 2	2.22239	3	13	2
ENSG00000272841	RP3-428L16.2	MAP3K4 antisense RNA 1	2.22239	2.80735	13	2
ENSG00000145244	CORIN	corin, serine peptidase	2.20163	4.21723	45	9
ENSG00000149212	SESN3	sestrin 3	2.19265	4.10434	31	6
ENSG00000115380	EFEMP1	EGF containing fibulin extracellular matrix protein 1	2.1788	8.63372	651	143
ENSG00000116774	OLFML3	olfactomedin like 3	2.17247	8.75956	567	125
ENSG00000165995	CACNB2	calcium voltage-gated channel auxiliary subunit beta 2	2.16993	2.53605	8	1
ENSG00000077420	APBB1IP	amyloid beta precursor protein binding family B member 1 interacting protein	2.16993	3.37851	17	3
ENSG00000159388	BTG2	BTG anti-proliferation factor 2	2.16993	3.37851	17	3
ENSG00000240666	MME-AS1	MME antisense RNA 1	2.16993	3.10434	17	3
ENSG00000214140	PRCD	photoreceptor disc component	2.16993	2.32193	8	1
ENSG00000145934	TENM2	teneurin transmembrane protein 2	2.16993	2.26303	8	1
ENSG00000122176	FMOD	fibromodulin	2.16993	2.76553	8	1
ENSG00000186340	THBS2	thrombospondin 2	2.16202	7.26303	272	60
ENSG00000168209	DDIT4	DNA damage inducible transcript 4	2.14405	8.2891	441	99
ENSG00000183691	NOG	noggin	2.1375	3.80735	21	4
ENSG00000143162	CREG1	cellular repressor of E1A stimulated genes 1	2.1375	5.29278	65	14
ENSG00000115594	IL1R1	interleukin 1 receptor type 1	2.13303	6.94953	192	43
ENSG00000146278	PNRC1	proline rich nuclear receptor coactivator 1	2.12029	5.87283	99	22
ENSG00000274180	NATD1	N-acetyltransferase domain containing 1	2.11548	3.16993	12	2
ENSG00000104419	NDRG1	N-myc downstream regulated 1	2.10852	6.1416	137	31
ENSG00000133639	BTG1	BTG anti-proliferation factor 1	2.10434	4.66676	42	9
ENSG00000230333	AC004538.3	novel transcript, antisense to THSD7A	2.08746	3.37851	16	3
ENSG00000204381	LAYN	layilin	2.08746	5.70044	84	19
ENSG00000108960	MMD	monocyte to macrophage differentiation associated	2.05889	4.76553	49	11
ENSG00000144560	VGLL4	vestigial like family member 4	2.05585	5.16993	78	18
ENSG00000113389	NPR3	natriuretic peptide receptor 3	2.04064	7.18587	287	69
ENSG00000140450	ARRDC4	arrestin domain containing 4	2.03562	5.34341	40	9
ENSG00000168734	PKIG	cAMP-dependent protein kinase inhibitor gamma	2.03395	5.59096	85	20
ENSG00000071282	LMCD1	LIM and cysteine rich domains 1	2.01017	7.88142	426	105
ENSG00000165124	SVEP1	sushi, von Willebrand factor type A, EGF and pentraxin domain containing 1	2	4.18587	31	7
ENSG00000263238	Not available	cathepsin O	2	4.44626	27	6
ENSG00000039537	C6	complement C6	2	1.926	3	0
ENSG00000187260	WDR86	WD repeat domain 86	2	1.26303	3	0
ENSG00000250934	RP11-71E19.1	novel transcript	2	1.67807	7	1
ENSG00000230537	RP11-305L7.1	novel transcript	2	1.26303	3	0
ENSG00000278843	Not available	matrix metallopeptidase 28	2	1.848	3	0
ENSG00000162849	KIF26B	kinesin family member 26B	2	2.43296	7	1
ENSG00000223891	OSER1-AS1	OSER1 divergent transcript	2	2.76553	11	2
ENSG00000164142	FAM160A1	family with sequence similarity 160 member A1	2	1.1375	3	0
ENSG00000163083	INHBB	inhibin subunit beta B	2	1.37851	3	0
ENSG00000101955	SRPX	sushi repeat containing protein X-linked	2	8.39232	503	125
ENSG00000226334	RP11-217B7.2	novel transcript	2	1.1375	3	0
ENSG00000175938	ORAI3	ORAI calcium release-activated calcium modulator 3	2	3.70044	19	4
ENSG00000186907	RTN4RL2	reticulon 4 receptor like 2	2	1.37851	3	0
ENSG00000262655	SPON1	spondin 1	2	2.67807	15	3
ENSG00000164463	CREBRF	CREB3 regulatory factor	2	2.80735	11	2
ENSG00000163251	FZD5	frizzled class receptor 5	2	1.37851	3	0
ENSG00000122641	INHBA	inhibin subunit beta A	2	5.12928	87	21
ENSG00000237949	LINC00844	long intergenic non-protein coding RNA 844	2	1.48543	3	0
ENSG00000158747	NBL1	NBL1, DAN family BMP antagonist	1.98995	7.3837	285	71
ENSG00000103888	CEMIP	cell migration inducing hyaluronidase 1	1.98313	7.38198	169	42
ENSG00000136732	GYPC	glycophorin C (Gerbich blood group)	1.92961	5.91169	79	20
ENSG00000255471	RP11-736K20.5	novel transcript	1.926	3.3505	18	4
ENSG00000169122	FAM110B	family with sequence similarity 110 member B	1.90689	2.96347	14	3
ENSG00000106484	MEST	mesoderm specific transcript	1.90689	4.30743	14	3
ENSG00000136235	GPNMB	glycoprotein nmb	1.89616	5.2854	66	17
ENSG00000188313	PLSCR1	phospholipid scramblase 1	1.89308	6.01792	103	27
ENSG00000105373	GLTSCR2	NOP53 ribosome biogenesis factor	1.88583	7.45943	254	68
ENSG00000135338	LCA5	lebercilin LCA5	1.87447	2.58496	10	2
ENSG00000108387	SEPT4	septin 4	1.87447	3	10	2
ENSG00000244694	PTCHD4	patched domain containing 4	1.87447	2.848	10	2
ENSG00000166900	STX3	syntaxin 3	1.87447	3.76553	21	5
ENSG00000266714	MYO15B	myosin XVB	1.87447	3	10	2
ENSG00000100100	PIK3IP1	phosphoinositide-3-kinase interacting protein 1	1.87447	2.926	10	2
ENSG00000138764	CCNG2	cyclin G2	1.86507	4.82782	50	13
ENSG00000184347	SLIT3	slit guidance ligand 3	1.86507	4.82782	50	13
ENSG00000136436	CALCOCO2	calcium binding and coiled-coil domain 2	1.86361	7.4363	352	96
ENSG00000104415	WISP1	cellular communication network factor 4	1.8606	6.47897	137	37
ENSG00000153823	PID1	phosphotyrosine interaction domain containing 1	1.848	3.26303	17	4
ENSG00000111907	TPD52L1	TPD52 like 1	1.84327	5.79701	60	16
ENSG00000080546	SESN1	sestrin 1	1.8413	4.56071	42	11
ENSG00000136869	TLR4	toll like receptor 4	1.80735	2.37851	6	1
ENSG00000100307	CBX7	chromobox 7	1.80735	2.20163	6	1
ENSG00000251144	CTD-2532K18.2	novel transcript	1.80735	3.26303	13	3
ENSG00000109099	PMP22	peripheral myelin protein 22	1.80255	6.54535	149	42
ENSG00000145390	USP53	ubiquitin specific peptidase 53	1.78136	5.93074	109	31
ENSG00000132640	BTBD3	BTB domain containing 3	1.77761	3.8679	23	6
ENSG00000167549	CORO6	coronin 6	1.77761	3.926	23	6
ENSG00000144857	BOC	BOC cell adhesion associated, oncogene regulated	1.73697	4.18587	29	8
ENSG00000104332	SFRP1	secreted frizzled related protein 1	1.73697	2.26303	9	2
ENSG00000139793	MBNL2	muscleblind like splicing regulator 2	1.72583	4.53605	42	12
ENSG00000231312	AC007246.3	MAP4K3 divergent transcript	1.71272	5.07039	58	17
ENSG00000154654	NCAM2	neural cell adhesion molecule 2	1.70044	2.80735	12	3
ENSG00000007255	TRAPPC6A	trafficking protein particle complex 6A	1.70044	3.53605	12	3
ENSG00000151491	EPS8	epidermal growth factor receptor pathway substrate 8	1.70044	5.58496	90	27
ENSG00000243244	STON1	stonin 1	1.68806	4.18587	28	8
ENSG00000000971	CFH	complement factor H	1.68281	7.36632	243	75
ENSG00000106299	WASL	WASP like actin nucleation promoting factor	1.67807	4.62059	47	14
ENSG00000100439	ABHD4	abhydrolase domain containing 4, N-acyl phospholipase B	1.66297	4.53605	37	11
ENSG00000241399	CD302	CD302 molecule	1.65208	3.80735	21	6
ENSG00000167323	STIM1	stromal interaction molecule 1	1.6477	5.70044	93	29
ENSG00000105664	COMP	cartilage oligomeric matrix protein	1.64636	5.88264	71	22
ENSG00000049449	RCN1	reticulocalbin 1	1.63136	9.09381	789	254
ENSG00000120549	KIAA1217	KIAA1217	1.62149	5.09592	39	12
ENSG00000124762	CDKN1A	cyclin dependent kinase inhibitor 1A	1.60682	8.16088	398	130
ENSG00000166033	HTRA1	HtrA serine peptidase 1	1.59003	9.29875	854	283
ENSG00000165312	OTUD1	OTU deubiquitinase 1	1.58496	2	5	1
ENSG00000181804	SLC9A9	solute carrier family 9 member A9	1.58496	2.20163	5	1
ENSG00000134548	SPX	spexin hormone	1.58496	1.26303	2	0
ENSG00000181374	CCL13	C-C motif chemokine ligand 13	1.58496	4.40599	14	4
ENSG00000272824	RP6-74O6.6	novel transcript	1.58496	1.67807	2	0
ENSG00000235020	RP11-109I13.2	novel transcript	1.58496	2.32193	5	1
ENSG00000151117	TMEM86A	transmembrane protein 86A	1.58496	1.1375	2	0
ENSG00000100342	APOL1	apolipoprotein L1	1.58496	4.1375	23	7
ENSG00000163746	PLSCR2	phospholipid scramblase 2	1.58496	1.1375	2	0
ENSG00000104432	IL7	interleukin 7	1.58496	2.1375	5	1
ENSG00000164342	TLR3	toll like receptor 3	1.58496	2.26303	5	1
ENSG00000244558	KCNK15-AS1	KCNK15 and WISP2 antisense RNA 1	1.58496	1.26303	2	0
ENSG00000260578	CTD-2541J13.1	novel transcript	1.58496	2.48543	8	2
ENSG00000109625	CPZ	carboxypeptidase Z	1.58496	2.32193	5	1
ENSG00000042062	FAM65C	RIPOR family member 3	1.58496	2.20163	5	1
ENSG00000168955	TM4SF20	transmembrane 4 L six family member 20	1.58496	2	5	1
ENSG00000264672	SEPT4-AS1	SEPTIN4 antisense RNA 1	1.58496	1.67807	2	0
ENSG00000205236	RP11-514P8.6	novel protein, UPK3BL-RASA4 readthrough	1.58496	1.1375	2	0
ENSG00000170458	CD14	CD14 molecule	1.58496	2.26303	5	1
ENSG00000134769	DTNA	dystrobrevin alpha	1.58496	2.26303	5	1
ENSG00000047648	ARHGAP6	Rho GTPase activating protein 6	1.58496	1.926	5	1
ENSG00000006459	KDM7A	lysine demethylase 7A	1.58496	1.848	5	1
ENSG00000138944	KIAA1644	shisa like 1	1.58496	2.72247	8	2
ENSG00000116194	ANGPTL1	angiopoietin like 1	1.58496	2.1375	5	1
ENSG00000132000	PODNL1	podocan like 1	1.5502	5.08746	40	13
ENSG00000148175	STOM	stomatin	1.5502	5.74416	81	27
ENSG00000169604	ANTXR1	ANTXR cell adhesion molecule 1	1.53343	6.55459	164	56
ENSG00000164938	TP53INP1	tumor protein p53 inducible nuclear protein 1	1.51457	3.848	19	6
ENSG00000163393	SLC22A15	solute carrier family 22 member 15	1.5025	3.1375	16	5
ENSG00000113594	LIFR	LIF receptor subunit alpha	1.5025	3.56071	16	5
ENSG00000184557	SOCS3	suppressor of cytokine signaling 3	1.5025	4.08746	16	5
ENSG00000103145	HCFC1R1	host cell factor C1 regulator 1	1.48543	5.15381	41	14
ENSG00000206560	ANKRD28	ankyrin repeat domain 28	1.48543	6.23266	125	44
ENSG00000152661	GJA1	gap junction protein alpha 1	1.47883	7.98299	392	140
ENSG00000003436	TFPI	tissue factor pathway inhibitor	1.47534	6.1416	113	40
ENSG00000282854	Not available	ArfGAP with SH3 domain, ankyrin repeat and PH domain 3	1.47393	4.40599	24	8
ENSG00000088280	ASAP3	ArfGAP with SH3 domain, ankyrin repeat and PH domain 3	1.47393	4.40599	24	8
ENSG00000123096	SSPN	sarcospan	1.45943	2.80735	10	3
ENSG00000183098	GPC6	glypican 6	1.45943	4.03562	21	7
ENSG00000260618	RP11-23N2.4	novel transcript, antisense to KIAA1370	1.45943	2.76553	10	3
ENSG00000168300	PCMTD1	protein-L-isoaspartate (D-aspartate) O-methyltransferase domain containing 1	1.45943	4.56071	32	11
ENSG00000180573	HIST1H2AC	H2A clustered histone 6	1.44746	5.0268	29	10
ENSG00000163815	CLEC3B	C-type lectin domain family 3 member B	1.44057	4.54844	18	6
ENSG00000143382	ADAMTSL4	ADAMTS like 4	1.44057	5.78136	56	20
ENSG00000179241	LDLRAD3	low density lipoprotein receptor class A domain containing 3	1.42884	4.33628	34	12
ENSG00000142089	IFITM3	interferon induced transmembrane protein 3	1.42826	10.6449	1716	637
ENSG00000127314	RAP1B	RAP1B, member of RAS oncogene family	1.42249	8.26772	452	168
ENSG00000145687	SSBP2	single stranded DNA binding protein 2	1.42223	5.3505	66	24
ENSG00000122547	EEPD1	endonuclease/exonuclease/phosphatase family domain containing 1	1.41504	2.20163	7	2
ENSG00000185862	EVI2B	ecotropic viral integration site 2B	1.41504	2.67807	7	2
ENSG00000184678	HIST2H2BE	H2B clustered histone 21	1.41504	2.72247	7	2
ENSG00000183762	KREMEN1	kringle containing transmembrane protein 1	1.41504	2.26303	7	2
ENSG00000152527	PLEKHH2	pleckstrin homology, MyTH4 and FERM domain containing H2	1.41504	2.37851	7	2
ENSG00000070214	SLC44A1	solute carrier family 44 member 1	1.39046	5.9542	96	36
ENSG00000117262	GPR89A	G protein-coupled receptor 89A	1.38793	6.38543	122	46
ENSG00000259345	RP11-624L4.1	novel transcript	1.37851	4.52356	38	14
ENSG00000128262	POM121L9P	POM121 transmembrane nucleoporin like 9, pseudogene	1.32193	5.14568	19	7
ENSG00000282147	Not available	FAM20C golgi associated secretory pathway kinase	1.32193	3.51096	4	1
ENSG00000215861	WI2-1896O14.1	phosphodiesterase 4D interacting protein (myomegalin) (PDE4DIP) pseudogene	1.32193	4.16993	29	11
ENSG00000205403	CFI	complement factor I	1.32193	2.67807	4	1
ENSG00000283352	GUSBP1	novel transcript	1.32193	1.76553	4	1
ENSG00000225790	RP11-2L8.1	novel transcript	1.32193	1.926	4	1
ENSG00000260912	RP11-363E7.4	novel transcript, overlapping ACER2	1.32193	1.48543	4	1
ENSG00000144152	FBLN7	fibulin 7	1.32193	2	4	1
ENSG00000131669	NINJ1	ninjurin 1	1.32193	4.71149	29	11
ENSG00000196611	MMP1	matrix metallopeptidase 1	1.32193	1.67807	4	1
ENSG00000243137	PSG4	pregnancy specific beta-1-glycoprotein 4	1.32193	2.07039	4	1
ENSG00000283009	Not available	zinc finger protein 436	1.32193	2.07039	4	1
ENSG00000234741	GAS5	growth arrest specific 5	1.29727	8.98755	579	235
ENSG00000210196	MT-TP	mitochondrially encoded tRNA-Pro (CCN)	1.27277	9.53605	951	393
ENSG00000124191	TOX2	TOX high mobility group box family member 2	1.26303	3.03562	11	4
ENSG00000164823	OSGIN2	oxidative stress induced growth inhibitor family member 2	1.26303	2.80735	11	4
ENSG00000140545	MFGE8	milk fat globule EGF and factor V/VIII domain containing	1.25085	9.35887	801	336
ENSG00000147852	VLDLR	very low density lipoprotein receptor	1.22239	2.1375	6	2
ENSG00000186205	MARC1	mitochondrial amidoxime reducing component 1	1.22239	2.48543	6	2
ENSG00000221963	APOL6	apolipoprotein L6	1.22239	2.20163	6	2
ENSG00000226742	HSBP1L1	heat shock factor binding protein 1 like 1	1.22239	4.848	34	14
ENSG00000204941	PSG5	pregnancy specific beta-1-glycoprotein 5	1.22239	2.76553	6	2
ENSG00000213462	ERV3-1	endogenous retrovirus group 3 member 1, envelope	1.22239	3.70044	20	8
ENSG00000204642	HLA-F	major histocompatibility complex, class I, F	1.22239	2.48543	6	2
ENSG00000109272	PF4V1	platelet factor 4 variant 1	1.22239	3.10434	6	2
ENSG00000165424	ZCCHC24	zinc finger CCHC-type containing 24	1.19794	5.00899	38	16
ENSG00000125968	ID1	inhibitor of DNA binding 1, HLH protein	1.18763	5.24031	40	17
ENSG00000197329	PELI1	pellino E3 ubiquitin protein ligase 1	1.16993	2.48543	8	3
ENSG00000240694	PNMA2	PNMA family member 2	1.16993	3.1375	8	3
ENSG00000163297	ANTXR2	ANTXR cell adhesion molecule 2	1.14975	5.37851	70	31
ENSG00000171444	MCC	MCC regulator of WNT signaling pathway	1.1375	3.03562	10	4
ENSG00000233901	LINC01503	long intergenic non-protein coding RNA 1503	1.11548	3.80735	12	5
ENSG00000169429	CXCL8	C-X-C motif chemokine ligand 8	1.11548	5.27053	38	17
ENSG00000154258	ABCA9	ATP binding cassette subfamily A member 9	1.09954	3.82782	14	6
ENSG00000133466	C1QTNF6	C1q and TNF related 6	1.08746	3.82782	16	7
ENSG00000176971	FIBIN	fin bud initiation factor homolog	1.02857	5.72247	50	24

## Sheet: Other genes down (black dots)
ENSEMBL ID	Symbol	Description	log2 FC	mean log2 TPM	TPM (day = 28)	TPM (day = 3)
ENSG00000246859	STARD4-AS1	STARD4 antisense RNA 1	-4.80735	4.60881	2	83
ENSG00000134986	NREP	neuronal regeneration related protein	-4.37229	8.03672	37	786
ENSG00000117399	CDC20	cell division cycle 20	-4.24793	3.65535	1	37
ENSG00000146670	CDCA5	cell division cycle associated 5	-4.08746	2.63227	0	16
ENSG00000250064	RP11-123O22.1	novel transcript	-3.90689	2.32193	0	14
ENSG00000244534	RN7SL211P	RNA, 7SL, cytoplasmic 211, pseudogene	-3.90689	3.16993	1	29
ENSG00000237649	KIFC1	kinesin family member C1	-3.90689	2.43296	0	14
ENSG00000123485	HJURP	Holliday junction recognition protein	-3.80735	2.32193	0	13
ENSG00000089685	BIRC5	baculoviral IAP repeat containing 5	-3.80735	3.26303	1	27
ENSG00000135074	ADAM19	ADAM metallopeptidase domain 19	-3.73697	3.848	2	39
ENSG00000250038	RP11-180C1.1	novel transcript	-3.70044	2	0	12
ENSG00000122952	ZWINT	ZW10 interacting kinetochore protein	-3.64386	3.29278	1	24
ENSG00000134057	CCNB1	cyclin B1	-3.63227	4.6893	4	61
ENSG00000011426	ANLN	anillin actin binding protein	-3.58496	3.65535	2	35
ENSG00000093009	CDC45	cell division cycle 45	-3.58496	2.07039	0	11
ENSG00000113368	LMNB1	lamin B1	-3.52356	3.1375	1	22
ENSG00000143228	NUF2	NUF2 component of NDC80 kinetochore complex	-3.52356	3	1	22
ENSG00000132688	NES	nestin	-3.52356	3.16993	1	22
ENSG00000186185	KIF18B	kinesin family member 18B	-3.45943	2	0	10
ENSG00000117724	CENPF	centromere protein F	-3.45943	3.20163	1	21
ENSG00000088325	TPX2	TPX2 microtubule nucleation factor	-3.45943	3.72247	2	32
ENSG00000148773	MKI67	marker of proliferation Ki-67	-3.45943	2.1375	0	10
ENSG00000182481	KPNA2	karyopherin subunit alpha 2	-3.33628	5.43962	9	100
ENSG00000121152	NCAPH	non-SMC condensin I complex subunit H	-3.32193	1.926	0	9
ENSG00000183856	IQGAP3	IQ motif containing GTPase activating protein 3	-3.32193	1.926	0	9
ENSG00000198901	PRC1	protein regulator of cytokinesis 1	-3.32193	3.94486	3	39
ENSG00000165480	SKA3	spindle and kinetochore associated complex subunit 3	-3.32193	1.926	0	9
ENSG00000261786	RP4-555D20.2	novel transcript	-3.32193	3.16993	1	19
ENSG00000188229	TUBB4B	tubulin beta 4B class IVb	-3.31741	7.17991	31	318
ENSG00000258947	TUBB3	tubulin beta 3 class III	-3.25873	6.17792	13	133
ENSG00000171241	SHCBP1	SHC binding and spindle associated 1	-3.24793	2.67807	1	18
ENSG00000164611	PTTG1	PTTG1 regulator of sister chromatid separation, securin	-3.20163	4.47249	4	45
ENSG00000166803	KIAA0101	PCNA clamp associated factor	-3.1964	4.57289	5	54
ENSG00000105011	ASF1B	anti-silencing function 1B histone chaperone	-3.16993	1.848	0	8
ENSG00000138180	CEP55	centrosomal protein 55	-3.16993	2.67807	1	17
ENSG00000205177	C11orf91	chromosome 11 open reading frame 91	-3.16993	1.67807	0	8
ENSG00000279501	bP-2171C21.3	novel transcript	-3.16993	1.926	0	8
ENSG00000169607	CKAP2L	cytoskeleton associated protein 2 like	-3.16993	1.848	0	8
ENSG00000092853	CLSPN	claspin	-3.16993	1.67807	0	8
ENSG00000257219	RP11-54A9.1	lncRNA osteogenesis associated	-3.16993	3.45943	2	26
ENSG00000140451	PIF1	PIF1 5'-to-3' DNA helicase	-3.16993	3.16993	1	17
ENSG00000157168	NRG1	neuregulin 1	-3.16993	2.926	1	17
ENSG00000135451	TROAP	trophinin associated protein	-3.16993	2.848	1	17
ENSG00000164161	HHIP	hedgehog interacting protein	-3.16993	1.58496	0	8
ENSG00000071539	TRIP13	thyroid hormone receptor interactor 13	-3.16993	2.76553	1	17
ENSG00000131747	TOP2A	DNA topoisomerase II alpha	-3.16993	3.90689	3	35
ENSG00000117632	STMN1	stathmin 1	-3.1592	5.91169	14	133
ENSG00000013810	TACC3	transforming acidic coiled-coil containing protein 3	-3.11548	3.40599	2	25
ENSG00000160957	RECQL4	RecQ like helicase 4	-3.08746	2.80735	1	16
ENSG00000187741	FANCA	FA complementation group A	-3.05889	3.16993	2	24
ENSG00000140092	FBLN5	fibulin 5	-3.01301	7.96347	68	556
ENSG00000066279	ASPM	assembly factor for spindle microtubules	-3	1.848	0	7
ENSG00000090889	KIF4A	kinesin family member 4A	-3	1.76553	0	7
ENSG00000253057	RN7SKP57	RN7SK pseudogene 57	-3	1.26303	0	7
ENSG00000248890	HHIP-AS1	HHIP antisense RNA 1	-3	1.926	0	7
ENSG00000121211	MND1	meiotic nuclear divisions 1	-3	1.76553	0	7
ENSG00000105255	FSD1	fibronectin type III and SPRY domain containing 1	-3	1.848	0	7
ENSG00000164109	MAD2L1	mitotic arrest deficient 2 like 1	-3	3.26303	2	23
ENSG00000277909	Not available	SPC25 component of NDC80 kinetochore complex	-3	1.76553	0	7
ENSG00000157193	LRP8	LDL receptor related protein 8	-3	2.76553	1	15
ENSG00000212724	KRTAP2-3	keratin associated protein 2-3	-3	1.48543	0	7
ENSG00000024526	DEPDC1	DEP domain containing 1	-3	1.848	0	7
ENSG00000137812	KNL1	kinetochore scaffold 1	-3	1.67807	0	7
ENSG00000142945	KIF2C	kinesin family member 2C	-3	2.67807	1	15
ENSG00000262862	Not available	keratin associated protein 2-3	-3	1.48543	0	7
ENSG00000137807	KIF23	kinesin family member 23	-2.9386	3.10434	2	22
ENSG00000091651	ORC6	origin recognition complex subunit 6	-2.9386	3.23266	2	22
ENSG00000137804	NUSAP1	nucleolar and spindle associated protein 1	-2.9386	3.37851	2	22
ENSG00000106537	TSPAN13	tetraspanin 13	-2.90689	2.43296	1	14
ENSG00000109805	NCAPG	non-SMC condensin I complex subunit G	-2.90689	2.53605	1	14
ENSG00000154277	UCHL1	ubiquitin C-terminal hydrolase L1	-2.88486	7.55766	43	324
ENSG00000127586	CHTF18	chromosome transmission fidelity factor 18	-2.87447	3.1375	2	21
ENSG00000072571	HMMR	hyaluronan mediated motility receptor	-2.80735	2.58496	1	13
ENSG00000065328	MCM10	minichromosome maintenance 10 replication initiation factor	-2.80735	1.37851	0	6
ENSG00000126787	DLGAP5	DLG associated protein 5	-2.80735	2.58496	1	13
ENSG00000143476	DTL	denticleless E3 ubiquitin protein ligase homolog	-2.80735	1.58496	0	6
ENSG00000262634	Not available	spindle and kinetochore associated complex subunit 1	-2.80735	1.37851	0	6
ENSG00000135476	ESPL1	extra spindle pole bodies like 1, separase	-2.80735	1.67807	0	6
ENSG00000157456	CCNB2	cyclin B2	-2.80735	3.16993	2	20
ENSG00000162062	C16orf59	tubulin epsilon and delta complex 2	-2.80735	1.848	0	6
ENSG00000100297	MCM5	minichromosome maintenance complex component 5	-2.80735	3.53605	3	27
ENSG00000167552	TUBA1A	tubulin alpha 1a	-2.7851	8.19869	83	578
ENSG00000265415	CTD-2510F5.4	novel transcript, antisense to PRR11	-2.76553	3.7866	4	33
ENSG00000123219	CENPK	centromere protein K	-2.75489	3.56071	3	26
ENSG00000101194	SLC17A9	solute carrier family 17 member 9	-2.70044	4.26303	5	38
ENSG00000011347	SYT7	synaptotagmin 7	-2.70044	2.53605	1	12
ENSG00000168496	FEN1	flap structure-specific endonuclease 1	-2.70044	3.45943	3	25
ENSG00000100162	CENPM	centromere protein M	-2.70044	2.48543	1	12
ENSG00000205683	DPF3	double PHD fingers 3	-2.70044	2.53605	1	12
ENSG00000170558	CDH2	cadherin 2	-2.69302	5.27053	14	96
ENSG00000138675	FGF5	fibroblast growth factor 5	-2.67807	3.82782	4	31
ENSG00000157111	TMEM171	transmembrane protein 171	-2.66297	3.48543	2	18
ENSG00000076382	SPAG5	sperm associated antigen 5	-2.66297	3	2	18
ENSG00000198826	ARHGAP11A	Rho GTPase activating protein 11A	-2.66297	3	2	18
ENSG00000068489	PRR11	proline rich 11	-2.66297	3.03562	2	18
ENSG00000119969	HELLS	helicase, lymphoid specific	-2.66297	2.96347	2	18
ENSG00000112984	KIF20A	kinesin family member 20A	-2.58496	2.48543	1	11
ENSG00000111247	RAD51AP1	RAD51 associated protein 1	-2.58496	2.32193	1	11
ENSG00000157870	FAM213B	peroxiredoxin like 2B	-2.58496	2.72247	1	11
ENSG00000011332	DPF1	double PHD fingers 1	-2.58496	1.58496	0	5
ENSG00000134690	CDCA8	cell division cycle associated 8	-2.58496	2.26303	1	11
ENSG00000275125	Not available	peroxiredoxin like 2B	-2.58496	2.72247	1	11
ENSG00000187951	ARHGAP11B	novel transcript	-2.58496	2.53605	1	11
ENSG00000099849	RASSF7	Ras association domain family member 7	-2.58496	1.37851	0	5
ENSG00000131462	TUBG1	tubulin gamma 1	-2.58496	4.97269	9	59
ENSG00000276365	MIR145	microRNA 145	-2.58496	3	1	11
ENSG00000179750	APOBEC3B	apolipoprotein B mRNA editing enzyme catalytic subunit 3B	-2.58496	1.76553	0	5
ENSG00000075218	GTSE1	G2 and S-phase expressed 1	-2.58496	2.26303	1	11
ENSG00000094804	CDC6	cell division cycle 6	-2.58496	1.26303	0	5
ENSG00000131153	GINS2	GINS complex subunit 2	-2.58496	1.37851	0	5
ENSG00000137310	TCF19	transcription factor 19	-2.58496	1.37851	0	5
ENSG00000171320	ESCO2	establishment of sister chromatid cohesion N-acetyltransferase 2	-2.58496	1.37851	0	5
ENSG00000129195	FAM64A	PICALM interacting mitotic regulator	-2.58496	2.20163	1	11
ENSG00000163507	KIAA1524	cellular inhibitor of PP2A	-2.58496	2.43296	1	11
ENSG00000138131	LOXL4	lysyl oxidase like 4	-2.52356	4.91648	7	45
ENSG00000189159	HN1	Jupiter microtubule associated homolog 1	-2.50499	6.55152	33	192
ENSG00000111665	CDCA3	cell division cycle associated 3	-2.5025	2.848	2	16
ENSG00000188486	H2AFX	H2A.X variant histone	-2.5025	4.07039	5	33
ENSG00000112118	MCM3	minichromosome maintenance complex component 3	-2.45943	3.926	5	32
ENSG00000051180	RAD51	RAD51 recombinase	-2.45943	2.26303	1	10
ENSG00000101447	FAM83D	family with sequence similarity 83 member D	-2.45943	2.20163	1	10
ENSG00000188487	INSC	INSC spindle orientation adaptor protein	-2.45943	2.32193	1	10
ENSG00000138160	KIF11	kinesin family member 11	-2.45943	2.37851	1	10
ENSG00000187193	MT1X	metallothionein 1X	-2.44478	7.47411	53	293
ENSG00000111641	NOP2	NOP2 nucleolar protein	-2.43296	4.91648	9	53
ENSG00000225830	ERCC6	ERCC excision repair 6, chromatin remodeling factor	-2.42626	4.26303	7	42
ENSG00000145681	HAPLN1	hyaluronan and proteoglycan link protein 1	-2.42146	6.39917	27	149
ENSG00000128340	RAC2	Rac family small GTPase 2	-2.41504	3.43296	2	15
ENSG00000187800	PEAR1	platelet endothelial aggregation receptor 1	-2.41504	3.60881	2	15
ENSG00000147536	GINS4	GINS complex subunit 4	-2.41504	2.72247	2	15
ENSG00000151725	CENPU	centromere protein U	-2.41504	2.848	2	15
ENSG00000040275	SPDL1	spindle apparatus coiled-coil protein 1	-2.39232	4.7761	11	62
ENSG00000105825	TFPI2	tissue factor pathway inhibitor 2	-2.39232	3.10434	3	20
ENSG00000089280	FUS	FUS RNA binding protein	-2.38187	7.46271	65	343
ENSG00000260549	MT1L	metallothionein 1L, pseudogene	-2.37615	7.00899	46	243
ENSG00000261040	WFDC21P	WAP four-disulfide core domain 21, pseudogene	-2.37504	5.34341	15	82
ENSG00000137267	TUBB2A	tubulin beta 2A class IIa	-2.36405	6.0268	26	138
ENSG00000258232	RP11-161H23.5	novel transcript, antisense to TUBA1C	-2.35755	5.12928	15	81
ENSG00000174371	EXO1	exonuclease 1	-2.32193	2	1	9
ENSG00000100065	CARD10	caspase recruitment domain family member 10	-2.32193	1.58496	0	4
ENSG00000101003	GINS1	GINS complex subunit 1	-2.32193	2.1375	1	9
ENSG00000138092	CENPO	centromere protein O	-2.32193	2.88753	2	14
ENSG00000233844	KCNQ5-IT1	Not available	-2.32193	1.1375	0	4
ENSG00000102384	CENPI	centromere protein I	-2.32193	2.63227	2	14
ENSG00000138650	PCDH10	protocadherin 10	-2.32193	1.37851	0	4
ENSG00000035499	DEPDC1B	DEP domain containing 1B	-2.32193	1.26303	0	4
ENSG00000171680	PLEKHG5	pleckstrin homology and RhoGEF domain containing G5	-2.32193	2.67807	1	9
ENSG00000267774	RP11-2N1.2	novel transcript, antisense to CCBE1	-2.32193	2.37851	1	9
ENSG00000145147	SLIT2	slit guidance ligand 2	-2.32193	3.03562	3	19
ENSG00000163462	TRIM46	tripartite motif containing 46	-2.32193	2.58496	1	9
ENSG00000115163	CENPA	centromere protein A	-2.32193	2.1375	1	9
ENSG00000118193	KIF14	kinesin family member 14	-2.32193	1.1375	0	4
ENSG00000173546	CSPG4	chondroitin sulfate proteoglycan 4	-2.32193	2.58496	2	14
ENSG00000156398	SFXN2	sideroflexin 2	-2.32193	2.848	2	14
ENSG00000161888	SPC24	SPC24 component of NDC80 kinetochore complex	-2.32193	2.63227	2	14
ENSG00000176014	TUBB6	tubulin beta 6 class V	-2.26628	7.43129	73	355
ENSG00000079616	KIF22	kinesin family member 22	-2.26303	3.65535	4	23
ENSG00000169715	MT1E	metallothionein 1E	-2.25481	8.25456	109	524
ENSG00000203760	CENPW	centromere protein W	-2.23704	3.848	6	32
ENSG00000135905	DOCK10	dedicator of cytokinesis 10	-2.23266	4.30743	9	46
ENSG00000158286	RNF207	ring finger protein 207	-2.22239	3.16993	2	13
ENSG00000185567	AHNAK2	AHNAK nucleoprotein 2	-2.22239	3.03562	2	13
ENSG00000133119	RFC3	replication factor C subunit 3	-2.22239	2.67807	2	13
ENSG00000256083	RP11-366L20.3	novel transcript, antisense to HMGA2	-2.22239	2.72247	2	13
ENSG00000139734	DIAPH3	diaphanous related formin 3	-2.22239	2.67807	2	13
ENSG00000137486	ARRB1	arrestin beta 1	-2.22239	3.07039	2	13
ENSG00000161970	RPL26	ribosomal protein L26	-2.20645	6.19377	25	119
ENSG00000101361	NOP56	NOP56 ribonucleoprotein	-2.20387	6.30378	27	128
ENSG00000172009	THOP1	thimet oligopeptidase 1	-2.18982	5.33628	15	72
ENSG00000197415	VEPH1	ventricular zone expressed PH domain containing 1	-2.16993	3.926	5	26
ENSG00000144354	CDCA7	cell division cycle associated 7	-2.16993	2.26303	1	8
ENSG00000281398	SNHG4	small nucleolar RNA host gene 4	-2.16993	4.3505	7	35
ENSG00000185347	C14orf80	tubulin epsilon and delta complex 1	-2.16993	2.20163	1	8
ENSG00000160193	WDR4	WD repeat domain 4	-2.16993	3.23266	3	17
ENSG00000183763	TRAIP	TRAF interacting protein	-2.16993	2.26303	1	8
ENSG00000154920	EME1	essential meiotic structure-specific endonuclease 1	-2.16993	2.1375	1	8
ENSG00000080986	NDC80	NDC80 kinetochore complex component	-2.16993	3.07039	3	17
ENSG00000108797	CNTNAP1	contactin associated protein 1	-2.16993	3.45943	3	17
ENSG00000104356	POP1	POP1 homolog, ribonuclease P/MRP subunit	-2.16993	2.1375	1	8
ENSG00000146143	PRIM2	DNA primase subunit 2	-2.16993	4.39232	9	44
ENSG00000120802	TMPO	thymopoietin	-2.16993	4.12102	7	35
ENSG00000138778	CENPE	centromere protein E	-2.16993	2.07039	1	8
ENSG00000180287	PLD5	phospholipase D family member 5	-2.16993	1.848	1	8
ENSG00000123473	STIL	STIL centriolar assembly protein	-2.16993	2.07039	1	8
ENSG00000138182	KIF20B	kinesin family member 20B	-2.16993	2.20163	1	8
ENSG00000124614	RPS10	ribosomal protein S10	-2.16506	6.88509	32	147
ENSG00000164211	STARD4	StAR related lipid transfer domain containing 4	-2.152	4.37851	8	39
ENSG00000179431	FJX1	four-jointed box kinase 1	-2.14684	3.8679	6	30
ENSG00000013016	EHD3	EH domain containing 3	-2.1375	3.65535	4	21
ENSG00000156113	KCNMA1	potassium calcium-activated channel subfamily M alpha 1	-2.12928	3.96347	7	34
ENSG00000174442	ZWILCH	zwilch kinetochore protein	-2.11548	3.67807	5	25
ENSG00000073111	MCM2	minichromosome maintenance complex component 2	-2.11548	2.63227	2	12
ENSG00000171130	ATP6V0E2	ATPase H+ transporting V0 subunit e2	-2.11548	2.96347	2	12
ENSG00000213694	S1PR3	sphingosine-1-phosphate receptor 3	-2.11548	2.96347	2	12
ENSG00000092820	EZR	ezrin	-2.11548	4.63227	11	51
ENSG00000112029	FBXO5	F-box protein 5	-2.11548	2.53605	2	12
ENSG00000242114	MTFP1	mitochondrial fission process 1	-2.11548	2.926	2	12
ENSG00000135919	SERPINE2	serpin family E member 2	-2.11414	9.80768	248	1077
ENSG00000072163	LIMS2	LIM zinc finger domain containing 2	-2.09954	4.12102	6	29
ENSG00000149503	INCENP	inner centromere protein	-2.08746	2.96347	3	16
ENSG00000161800	RACGAP1	Rac GTPase activating protein 1	-2.08746	4.05311	7	33
ENSG00000006634	DBF4	DBF4 zinc finger	-2.08746	3.07039	3	16
ENSG00000123975	CKS2	CDC28 protein kinase regulatory subunit 2	-2.08092	5.74416	25	109
ENSG00000100401	RANGAP1	Ran GTPase activating protein 1	-2.07529	4.93546	13	58
ENSG00000049540	ELN	elastin	-2.07039	5.20945	14	62
ENSG00000167553	TUBA1C	tubulin alpha 1c	-2.06413	8.23936	142	597
ENSG00000179041	RRS1	ribosome biogenesis regulator 1 homolog	-2.05889	3.94486	5	24
ENSG00000214706	IFRD2	interferon related developmental regulator 2	-2.05445	5	12	53
ENSG00000236383	LINC00854	coiled-coil domain containing 200	-2.05063	3.94486	6	28
ENSG00000110104	CCDC86	coiled-coil domain containing 86	-2.04439	4.16993	7	32
ENSG00000164694	FNDC1	fibronectin type III domain containing 1	-2.04439	4.37851	7	32
ENSG00000242125	SNHG3	small nucleolar RNA host gene 3	-2.04182	5.33628	16	69
ENSG00000206053	HN1L	Jupiter microtubule associated homolog 2	-2.02748	4.74416	12	52
ENSG00000125148	MT2A	metallothionein 2A	-2.01728	12.8159	3069	12427
ENSG00000220785	MTMR9LP	myotubularin related protein 9 like, pseudogene	-2	1.848	0	3
ENSG00000249669	CARMN	cardiac mesoderm enhancer-associated non-coding RNA	-2	3.926	5	23
ENSG00000107338	SHB	SH2 domain containing adaptor protein B	-2	1.1375	0	3
ENSG00000164087	POC1A	POC1 centriolar protein A	-2	1.926	1	7
ENSG00000165194	PCDH19	protocadherin 19	-2	1.67807	1	7
ENSG00000125912	NCLN	nicalin	-2	5.30012	16	67
ENSG00000139211	AMIGO2	adhesion molecule with Ig like domain 2	-2	2.63227	2	11
ENSG00000154839	SKA1	spindle and kinetochore associated complex subunit 1	-2	1.1375	0	3
ENSG00000126453	BCL2L12	BCL2 like 12	-2	4.15381	7	31
ENSG00000167670	CHAF1A	chromatin assembly factor 1 subunit A	-2	2.58496	2	11
ENSG00000167513	CDT1	chromatin licensing and DNA replication factor 1	-2	1.926	1	7
ENSG00000085840	ORC1	origin recognition complex subunit 1	-2	1.1375	0	3
ENSG00000162063	CCNF	cyclin F	-2	2.07039	1	7
ENSG00000163535	SGO2	shugoshin 2	-2	2.67807	2	11
ENSG00000143942	CHAC2	ChaC glutathione specific gamma-glutamylcyclotransferase 2	-2	2.26303	1	7
ENSG00000085999	RAD54L	RAD54 like	-2	1.848	1	7
ENSG00000176532	PRR15	proline rich 15	-2	1.48543	0	3
ENSG00000160949	TONSL	tonsoku like, DNA repair protein	-2	1.26303	0	3
ENSG00000110031	LPXN	leupaxin	-2	2.848	3	15
ENSG00000224093	RP5-1033H22.2	BCAR3 antisense RNA 1	-2	2.926	3	15
ENSG00000165490	DDIAS	DNA damage induced apoptosis suppressor	-2	1.76553	1	7
ENSG00000163814	CDCP1	CUB domain containing protein 1	-2	2.1375	1	7
ENSG00000128228	SDF2L1	stromal cell derived factor 2 like 1	-2	4.36457	10	43
ENSG00000183963	SMTN	smoothelin	-2	5.51728	19	79
ENSG00000104147	OIP5	Opa interacting protein 5	-2	1.926	1	7
ENSG00000185760	KCNQ5	potassium voltage-gated channel subfamily Q member 5	-2	2.20163	1	7
ENSG00000161692	DBF4B	DBF4 zinc finger B	-2	2.20163	1	7
ENSG00000149636	DSN1	DSN1 component of MIS12 kinetochore complex	-2	3.32193	4	19
ENSG00000146410	MTFR2	mitochondrial fission regulator 2	-2	1.1375	0	3
ENSG00000267141	CTB-31O20.8	novel transcript, antisense to KLF16	-2	1.37851	0	3
ENSG00000173267	SNCG	synuclein gamma	-2	1.58496	0	3
ENSG00000161681	SHANK1	SH3 and multiple ankyrin repeat domains 1	-2	2.63227	2	11
ENSG00000171877	FRMD5	FERM domain containing 5	-2	1.1375	0	3
ENSG00000184661	CDCA2	cell division cycle associated 2	-2	1.848	1	7
ENSG00000180801	ARSJ	arylsulfatase family member J	-1.96963	4.54844	11	46
ENSG00000160072	ATAD3B	ATPase family AAA domain containing 3B	-1.96963	4.54844	11	46
ENSG00000116455	WDR77	WD repeat domain 77	-1.96347	4.51096	9	38
ENSG00000148840	PPRC1	PPARG related coactivator 1	-1.9542	4.24793	7	30
ENSG00000164032	H2AFZ	H2A.Z variant histone 1	-1.94996	7.50303	87	339
ENSG00000115539	PDCL3	phosducin like 3	-1.91754	4.23266	8	33
ENSG00000174136	RGMB	repulsive guidance molecule BMP co-receptor b	-1.89308	3.848	6	25
ENSG00000115648	MLPH	melanophilin	-1.88753	4.67807	9	36
ENSG00000125885	MCM8	minichromosome maintenance 8 homologous recombination repair factor	-1.87447	2.43296	2	10
ENSG00000132436	FIGNL1	fidgetin like 1	-1.87447	2.48543	2	10
ENSG00000149090	PAMR1	peptidase domain containing associated with muscle regeneration 1	-1.87447	3.07039	2	10
ENSG00000012048	BRCA1	BRCA1 DNA repair associated	-1.87447	2.53605	2	10
ENSG00000100036	SLC35E4	solute carrier family 35 member E4	-1.87447	2.53605	2	10
ENSG00000111602	TIMELESS	timeless circadian regulator	-1.87447	2.63227	2	10
ENSG00000110427	KIAA1549L	KIAA1549 like	-1.87447	2.58496	2	10
ENSG00000185480	PARPBP	PARP1 binding protein	-1.87447	2.63227	2	10
ENSG00000112186	CAP2	cyclase associated actin cytoskeleton regulatory protein 2	-1.87447	2.43296	2	10
ENSG00000186575	NF2	neurofibromin 2	-1.8625	4.36457	10	39
ENSG00000131470	PSMC3IP	PSMC3 interacting protein	-1.848	3.07039	4	17
ENSG00000140525	FANCI	FA complementation group I	-1.848	3.20163	4	17
ENSG00000105486	LIG1	DNA ligase 1	-1.848	3.20163	4	17
ENSG00000154127	UBASH3B	ubiquitin associated and SH3 domain containing B	-1.8365	3.40599	6	24
ENSG00000136244	IL6	interleukin 6	-1.80735	1.926	1	6
ENSG00000198846	TOX	thymocyte selection associated high mobility group box	-1.80735	1.848	1	6
ENSG00000240661	RP11-174O3.3	novel V-set domain-containing pseudogene	-1.80735	2	1	6
ENSG00000134222	PSRC1	proline and serine rich coiled-coil 1	-1.80735	3.16993	3	13
ENSG00000136231	IGF2BP3	insulin like growth factor 2 mRNA binding protein 3	-1.80735	2.1375	1	6
ENSG00000170439	METTL7B	methyltransferase like 7B	-1.80735	1.848	1	6
ENSG00000121621	KIF18A	kinesin family member 18A	-1.80735	2	1	6
ENSG00000111664	GNB3	G protein subunit beta 3	-1.80735	3.1375	3	13
ENSG00000164220	F2RL2	coagulation factor II thrombin receptor like 2	-1.80735	2.07039	1	6
ENSG00000188766	SPRED3	sprouty related EVH1 domain containing 3	-1.80735	3.16993	3	13
ENSG00000281165	Not available	solute carrier family 2 member 6	-1.80735	2.07039	1	6
ENSG00000100558	PLEK2	pleckstrin 2	-1.80735	1.67807	1	6
ENSG00000162073	PAQR4	progestin and adipoQ receptor family member 4	-1.80735	1.848	1	6
ENSG00000149633	KIAA1755	KIAA1755	-1.80735	1.926	1	6
ENSG00000123416	TUBA1B	tubulin alpha 1b	-1.79699	9.68229	498	1733
ENSG00000005884	ITGA3	integrin subunit alpha 3	-1.79355	5.80735	29	103
ENSG00000089159	PXN	paxillin	-1.79008	5.59694	23	82
ENSG00000103966	EHD4	EH domain containing 4	-1.76553	3.03562	4	16
ENSG00000131351	HAUS8	HAUS augmin like complex subunit 8	-1.73697	2.37851	2	9
ENSG00000082126	MPP4	membrane palmitoylated protein 4	-1.73697	2.32193	2	9
ENSG00000117877	CD3EAP	RNA polymerase I subunit G	-1.73697	2.58496	2	9
ENSG00000154175	ABI3BP	ABI family member 3 binding protein	-1.72528	6.64386	61	204
ENSG00000133110	POSTN	periostin	-1.72401	10.5058	793	2622
ENSG00000057019	DCBLD2	discoidin, CUB and LCCL domain containing 2	-1.71425	5.80219	31	104
ENSG00000151388	ADAMTS12	ADAM metallopeptidase with thrombospondin type 1 motif 12	-1.70044	3.926	7	25
ENSG00000129667	RHBDF2	rhomboid 5 homolog 2	-1.70044	2.96347	3	12
ENSG00000138316	ADAMTS14	ADAM metallopeptidase with thrombospondin type 1 motif 14	-1.70044	2.72247	3	12
ENSG00000165661	QSOX2	quiescin sulfhydryl oxidase 2	-1.70044	3.10434	3	12
ENSG00000277027	RMRP	RNA component of mitochondrial RNA processing endoribonuclease	-1.69817	6.19771	48	158
ENSG00000140416	TPM1	tropomyosin 1	-1.67865	8.95942	312	1001
ENSG00000108829	LRRC59	leucine rich repeat containing 59	-1.66158	6.54226	54	173
ENSG00000188643	S100A16	S100 calcium binding protein A16	-1.61964	7.92837	136	420
ENSG00000172115	CYCS	cytochrome c, somatic	-1.59991	5.82782	31	96
ENSG00000189320	FAM180A	family with sequence similarity 180 member A	-1.58496	3.23266	6	20
ENSG00000146918	NCAPG2	non-SMC condensin II complex subunit G2	-1.58496	3.32193	6	20
ENSG00000125637	PSD4	pleckstrin and Sec7 domain containing 4	-1.58496	1.76553	1	5
ENSG00000159259	CHAF1B	chromatin assembly factor 1 subunit B	-1.58496	1.67807	1	5
ENSG00000149571	KIRREL3	kirre like nephrin family adhesion molecule 3	-1.58496	1.67807	1	5
ENSG00000187123	LYPD6	LY6/PLAUR domain containing 6	-1.58496	1.76553	1	5
ENSG00000049192	ADAMTS6	ADAM metallopeptidase with thrombospondin type 1 motif 6	-1.58496	3.7866	7	23
ENSG00000189057	FAM111B	FAM111 trypsin like peptidase B	-1.58496	1.48543	1	5
ENSG00000198056	PRIM1	DNA primase subunit 1	-1.58496	2.26303	2	8
ENSG00000100092	SH3BP1	SH3 domain binding protein 1	-1.58496	2	1	5
ENSG00000101311	FERMT1	fermitin family member 1	-1.58496	1.848	1	5
ENSG00000188522	FAM83G	family with sequence similarity 83 member G	-1.58496	1.76553	1	5
ENSG00000229563	LINC01204	long intergenic non-protein coding RNA 1204	-1.58496	1.58496	1	5
ENSG00000141499	WRAP53	WD repeat containing antisense to TP53	-1.58496	2.53605	2	8
ENSG00000241211	IQCJ-SCHIP1-AS1	IQCJ-SCHIP1 readthrough antisense RNA 1	-1.58496	1.48543	1	5
ENSG00000075702	WDR62	WD repeat domain 62	-1.58496	1.48543	1	5
ENSG00000128606	LRRC17	leucine rich repeat containing 17	-1.54432	3.88753	11	34
ENSG00000170624	SGCD	sarcoglycan delta	-1.52725	4.66676	16	48
ENSG00000106089	STX1A	syntaxin 1A	-1.47805	4.58496	13	38
ENSG00000197646	PDCD1LG2	programmed cell death 1 ligand 2	-1.45943	2.43296	3	10
ENSG00000179242	CDH4	cadherin 4	-1.45943	2.37851	3	10
ENSG00000223749	MIR503HG	MIR503 host gene	-1.42381	6.03122	40	109
ENSG00000142002	DPP9	dipeptidyl peptidase 9	-1.42321	5.12102	21	58
ENSG00000276953	TRBV12-4	T cell receptor beta variable 12-4	-1.41504	3.03562	5	15
ENSG00000092470	WDR76	WD repeat domain 76	-1.41504	2.07039	2	7
ENSG00000160298	C21orf58	chromosome 21 open reading frame 58	-1.41504	2.32193	2	7
ENSG00000171208	NETO2	neuropilin and tolloid like 2	-1.4021	4.48543	13	36
ENSG00000100003	SEC14L2	SEC14 like lipid binding 2	-1.37851	4.926	19	51
ENSG00000136824	SMC2	structural maintenance of chromosomes 2	-1.37851	3.03562	4	12
ENSG00000173530	TNFRSF10D	TNF receptor superfamily member 10d	-1.36257	4.65535	13	35
ENSG00000139354	GAS2L3	growth arrest specific 2 like 3	-1.32193	1.58496	1	4
ENSG00000156689	GLYATL2	glycine-N-acyltransferase like 2	-1.32193	1.37851	1	4
ENSG00000095752	IL11	interleukin 11	-1.32193	1.37851	1	4
ENSG00000166840	GLYATL1	glycine-N-acyltransferase like 1	-1.32193	1.26303	1	4
ENSG00000112877	CEP72	centrosomal protein 72	-1.32193	1.48543	1	4
ENSG00000001617	SEMA3F	semaphorin 3F	-1.32193	2.1375	1	4
ENSG00000196584	XRCC2	X-ray repair cross complementing 2	-1.32193	1.37851	1	4
ENSG00000121904	CSMD2	CUB and Sushi multiple domains 2	-1.32193	1.67807	1	4
ENSG00000166396	SERPINB7	serpin family B member 7	-1.32193	2	1	4
ENSG00000144230	GPR17	G protein-coupled receptor 17	-1.32193	1.67807	1	4
ENSG00000110400	NECTIN1	nectin cell adhesion molecule 1	-1.32193	1.67807	1	4
ENSG00000250657	RP11-1E6.1	novel transcript	-1.32193	1.37851	1	4
ENSG00000167912	RP11-25K19.1	novel transcript	-1.32193	1.926	1	4
ENSG00000107562	CXCL12	C-X-C motif chemokine ligand 12	-1.32193	4.29278	1	4
ENSG00000267061	RP11-760L24.1	novel transcript, antisense to CCBE1	-1.32193	1.848	1	4
ENSG00000114346	ECT2	epithelial cell transforming 2	-1.29546	4.05311	10	26
ENSG00000149428	HYOU1	hypoxia up-regulated 1	-1.28951	3.60881	8	21
ENSG00000280682	Not available	hypoxia up-regulated 1	-1.28951	3.60881	8	21
ENSG00000138623	SEMA7A	semaphorin 7A (John Milton Hagen blood group)	-1.2718	5.67807	40	98
ENSG00000268941	RP5-907D15.4	long intergenic non-protein coding RNA 1711	-1.22239	2	2	6
ENSG00000143549	TPM3	tropomyosin 3	-1.20469	7.83162	163	377
ENSG00000128641	MYO1B	myosin IB	-1.17284	6.19771	54	123
ENSG00000162545	CAMK2N1	calcium/calmodulin dependent protein kinase II inhibitor 1	-1.12553	4.05311	10	23
ENSG00000013297	CLDN11	claudin 11	-1.11103	5.2555	24	53
ENSG00000115461	IGFBP5	insulin like growth factor binding protein 5	-1.078	3.94486	8	18
ENSG00000231290	APCDD1L-AS1	APCDD1L divergent transcript	-1.05445	4	12	26
ENSG00000146376	ARHGAP18	Rho GTPase activating protein 18	-1.03747	4.53605	18	38
