# Supplementary material for: Metabolic and Transcriptional Changes across Osteogenic Differentiation of Mesenchymal Stromal Cells
Source: Bioengineering (Basel). 2021 Dec 10;8(12):208. doi: 10.3390/bioengineering8120208 (PMC8698318; doi:10.3390/bioengineering8120208)
Supplement: Supplementary file 1 [file bioengineering-08-00208-s001.zip › supplementary.table S11.xlsx]

## Sheet: TF up
Level	Term	Background rank	Found rank	Expected rank	Fold enrichment	Sign	P-value	Gene symbols	ENSEMBL IDs
0	FOXO-mediated transcription of cell death genes	15	4	0.0182083	219.68	+	6.432e-09	DDIT3, BCL6, FOXO1, NFYB	ENSG00000175197, ENSG00000113916, ENSG00000150907, ENSG00000120837
1	FOXO-mediated transcription	65	4	0.0789026	50.6954	+	1.37728e-06	DDIT3, BCL6, FOXO1, NFYB	ENSG00000175197, ENSG00000113916, ENSG00000150907, ENSG00000120837
2	Generic Transcription Pathway	1196	11	1.45181	7.57676	+	5.5009e-08	DDIT3, BCL6, FOXO1, NR1D2, ZNF436, PPARG, RORB, NFYB, FOS, CEBPB, NR1D1	ENSG00000175197, ENSG00000113916, ENSG00000150907, ENSG00000174738, ENSG00000125945, ENSG00000132170, ENSG00000198963, ENSG00000120837, ENSG00000170345, ENSG00000172216, ENSG00000126368
3	RNA Polymerase II Transcription	1318	11	1.5999	6.87542	+	1.47064e-07	DDIT3, BCL6, FOXO1, NR1D2, ZNF436, PPARG, RORB, NFYB, FOS, CEBPB, NR1D1	ENSG00000175197, ENSG00000113916, ENSG00000150907, ENSG00000174738, ENSG00000125945, ENSG00000132170, ENSG00000198963, ENSG00000120837, ENSG00000170345, ENSG00000172216, ENSG00000126368
0	ATF6 (ATF6-alpha) activates chaperone genes	9	2	0.010925	183.067	+	7.70993e-05	DDIT3, NFYB	ENSG00000175197, ENSG00000120837
1	ATF6 (ATF6-alpha) activates chaperones	11	2	0.0133528	149.782	+	0.000109178	DDIT3, NFYB	ENSG00000175197, ENSG00000120837
2	Unfolded Protein Response (UPR)	91	3	0.110464	27.1582	+	0.000196202	DDIT3, NFYB, CEBPB	ENSG00000175197, ENSG00000120837, ENSG00000172216
0	Response of EIF2AK1 (HRI) to heme deficiency	15	2	0.0182083	109.84	+	0.000189797	DDIT3, CEBPB	ENSG00000175197, ENSG00000172216
0	ATF4 activates genes in response to endoplasmic reticulum stress	27	3	0.0327749	91.5333	+	6.25484e-06	DDIT3, NFYB, CEBPB	ENSG00000175197, ENSG00000120837, ENSG00000172216
1	PERK regulates gene expression	32	3	0.0388444	77.2313	+	1.0043e-05	DDIT3, NFYB, CEBPB	ENSG00000175197, ENSG00000120837, ENSG00000172216
0	Nuclear Receptor transcription pathway	41	4	0.0497694	80.3707	+	2.42062e-07	NR1D2, PPARG, RORB, NR1D1	ENSG00000174738, ENSG00000132170, ENSG00000198963, ENSG00000126368
0	Transcriptional regulation of white adipocyte differentiation	83	4	0.100753	39.7012	+	3.4945e-06	EBF1, PPARG, CEBPB, CEBPD	ENSG00000164330, ENSG00000132170, ENSG00000172216, ENSG00000221869
0	Interleukin-4 and Interleukin-13 signaling	111	4	0.134741	29.6865	+	1.06084e-05	BCL6, FOXO1, FOS, CEBPD	ENSG00000113916, ENSG00000150907, ENSG00000170345, ENSG00000221869
1	Signaling by Interleukins	447	5	0.542607	9.21477	+	0.000183033	BCL6, FOXO1, STAT5A, FOS, CEBPD	ENSG00000113916, ENSG00000150907, ENSG00000126561, ENSG00000170345, ENSG00000221869
0	PPARA activates gene expression	114	3	0.138383	21.6789	+	0.00037382	PPARG, NFYB, NR1D1	ENSG00000132170, ENSG00000120837, ENSG00000126368
1	Regulation of lipid metabolism by PPARalpha	115	3	0.139597	21.4904	+	0.000383265	PPARG, NFYB, NR1D1	ENSG00000132170, ENSG00000120837, ENSG00000126368

## Sheet: TF down
Level	Term	Background rank	Found rank	Expected rank	Fold enrichment	Sign	P-value	Gene symbols	ENSEMBL IDs
0	Transcription of E2F targets under negative control by p107 (RBL1) and p130 (RBL2) in complex with HDAC1	16	2	0.00932265	214.531	+	4.7316e-05	E2F1, MYBL2	ENSG00000101412, ENSG00000101057
1	G0 and Early G1	27	2	0.015732	127.13	+	0.000125111	E2F1, MYBL2	ENSG00000101412, ENSG00000101057
0	Polo-like kinase mediated events	16	2	0.00932265	214.531	+	4.7316e-05	FOXM1, MYBL2	ENSG00000111206, ENSG00000101057
0	Formation of Senescence-Associated Heterochromatin Foci (SAHF)	16	2	0.00932265	214.531	+	4.7316e-05	HMGA2, HMGA1	ENSG00000149948, ENSG00000137309
2	Cellular Senescence	163	3	0.0949745	31.5874	+	0.000107066	HMGA2, HMGA1, E2F1	ENSG00000149948, ENSG00000137309, ENSG00000101412

## Sheet: Metabolic genes up
Level	Term	Background rank	Found rank	Expected rank	Fold enrichment	Sign	P-value	Gene symbols	ENSEMBL IDs
0	Glycogen storage disease type IV (GBE1)	3	2	0.011362	176.026	+	0.000139509	GBE1, GYG2	ENSG00000114480, ENSG00000056998
3	Diseases of metabolism	103	7	0.390095	17.9444	+	1.92777e-07	MAOA, GBE1, CYP19A1, GYG2, FMO3, CYP27A1, FDXR	ENSG00000189221, ENSG00000114480, ENSG00000137869, ENSG00000056998, ENSG00000007933, ENSG00000135929, ENSG00000161513
0	FMO oxidises nucleophiles	3	2	0.011362	176.026	+	0.000139509	FMO2, FMO3	ENSG00000094963, ENSG00000007933
1	Phase I - Functionalization of compounds	104	9	0.393882	22.8495	+	4.19542e-10	ADH1B, MAOA, FMO2, CYP19A1, FMO3, EPHX1, CYP27A1, FDXR, PTGIS	ENSG00000196616, ENSG00000189221, ENSG00000094963, ENSG00000137869, ENSG00000007933, ENSG00000143819, ENSG00000135929, ENSG00000161513, ENSG00000124212
2	Biological oxidations	219	10	0.829425	12.0566	+	1.48924e-08	ADH1B, MAOA, FMO2, CYP19A1, GGT5, FMO3, EPHX1, CYP27A1, FDXR, PTGIS	ENSG00000196616, ENSG00000189221, ENSG00000094963, ENSG00000137869, ENSG00000099998, ENSG00000007933, ENSG00000143819, ENSG00000135929, ENSG00000161513, ENSG00000124212
0	Chylomicron clearance	5	2	0.0189366	105.615	+	0.000291536	APOE, APOB	ENSG00000130203, ENSG00000084674
1	Plasma lipoprotein clearance	32	3	0.121194	24.7536	+	0.00031001	APOE, APOB, MYLIP	ENSG00000130203, ENSG00000084674, ENSG00000007944
2	Plasma lipoprotein assembly, remodeling, and clearance	67	4	0.253751	15.7635	+	0.000150397	APOE, APOB, MYLIP, ABCA1	ENSG00000130203, ENSG00000084674, ENSG00000007944, ENSG00000165029
0	Scavenging by Class A Receptors	19	4	0.0719592	55.587	+	1.57221e-06	FTH1, APOE, APOB, FTL	ENSG00000167996, ENSG00000130203, ENSG00000084674, ENSG00000087086
0	Plasma lipoprotein assembly	18	3	0.0681719	44.0064	+	6.54375e-05	APOE, APOB, ABCA1	ENSG00000130203, ENSG00000084674, ENSG00000165029
0	Endogenous sterols	27	4	0.102258	39.1168	+	5.46011e-06	CYP19A1, CYP27A1, FDXR, PTGIS	ENSG00000137869, ENSG00000135929, ENSG00000161513, ENSG00000124212
1	Cytochrome P450 - arranged by substrate type	65	4	0.246176	16.2485	+	0.00013458	CYP19A1, CYP27A1, FDXR, PTGIS	ENSG00000137869, ENSG00000135929, ENSG00000161513, ENSG00000124212
0	Metabolic disorders of biological oxidation enzymes	36	5	0.136344	36.672	+	4.52425e-07	MAOA, CYP19A1, FMO3, CYP27A1, FDXR	ENSG00000189221, ENSG00000137869, ENSG00000007933, ENSG00000135929, ENSG00000161513
0	Metabolism of steroid hormones	35	3	0.132556	22.6319	+	0.000396341	HSD11B1, CYP19A1, FDXR	ENSG00000117594, ENSG00000137869, ENSG00000161513
1	Metabolism of steroids	148	5	0.560524	8.92022	+	0.000284231	HSD11B1, CYP19A1, CYP27A1, FDXR, PTGIS	ENSG00000117594, ENSG00000137869, ENSG00000135929, ENSG00000161513, ENSG00000124212
2	Metabolism of lipids	733	17	2.77611	6.12368	+	2.15759e-09	PLPP1, PTGDS, CYP19A1, SCD5, GGT5, ACSS3, HSD11B1, ACSL1, G0S2, ALOX15B, CYP27A1, PNPLA3, DGAT2, PIK3R1, FDXR, ABCA1, PTGIS	ENSG00000067113, ENSG00000107317, ENSG00000137869, ENSG00000145284, ENSG00000099998, ENSG00000111058, ENSG00000117594, ENSG00000151726, ENSG00000123689, ENSG00000179593, ENSG00000135929, ENSG00000100344, ENSG00000062282, ENSG00000145675, ENSG00000161513, ENSG00000165029, ENSG00000124212
0	Iron uptake and transport	57	4	0.215878	18.529	+	8.3115e-05	FTH1, SLC40A1, CYBRD1, FTL	ENSG00000167996, ENSG00000138449, ENSG00000071967, ENSG00000087086
0	Arachidonic acid metabolism	59	4	0.223452	17.9009	+	9.43305e-05	PTGDS, GGT5, ALOX15B, PTGIS	ENSG00000107317, ENSG00000099998, ENSG00000179593, ENSG00000124212
1	Fatty acid metabolism	174	6	0.658995	9.10477	+	6.12492e-05	ACSL1, PTGDS, SCD5, GGT5, ALOX15B, PTGIS	ENSG00000151726, ENSG00000107317, ENSG00000145284, ENSG00000099998, ENSG00000179593, ENSG00000124212
0	Signaling by Nuclear Receptors	261	6	0.988492	6.06985	+	0.000517793	APOE, DHRS3, MYLIP, PIK3R1, PDK4, ABCA1	ENSG00000130203, ENSG00000162496, ENSG00000007944, ENSG00000145675, ENSG00000004799, ENSG00000165029
0	Signaling by Interleukins	447	8	1.69294	4.72552	+	0.000315498	DUSP4, MAOA, PIM1, SOD2, PTK2B, MAP3K8, PIK3R1, MAP2K6	ENSG00000120875, ENSG00000189221, ENSG00000137193, ENSG00000112096, ENSG00000120899, ENSG00000107968, ENSG00000145675, ENSG00000108984

## Sheet: Metabolic genes down
Level	Term	Background rank	Found rank	Expected rank	Fold enrichment	Sign	P-value	Gene symbols	ENSEMBL IDs
0	G2/M DNA replication checkpoint	5	2	0.0191794	104.278	+	0.000299032	CDK1, PKMYT1	ENSG00000170312, ENSG00000127564
1	G2/M Checkpoints	150	5	0.575382	8.68987	+	0.000320181	CDC25A, CDK1, CDC7, PKMYT1, NSD2	ENSG00000164045, ENSG00000170312, ENSG00000097046, ENSG00000127564, ENSG00000109685
2	Cell Cycle Checkpoints	270	10	1.03569	9.65541	+	1.11919e-07	BUB1, CDC25A, UBE2C, PLK1, BUB1B, CDK1, CDC7, PKMYT1, NSD2, AURKB	ENSG00000169679, ENSG00000164045, ENSG00000175063, ENSG00000166851, ENSG00000156970, ENSG00000170312, ENSG00000097046, ENSG00000127564, ENSG00000109685, ENSG00000178999
0	Phosphorylation of Emi1	6	2	0.0230153	86.8987	+	0.00039772	PLK1, CDK1	ENSG00000166851, ENSG00000170312
1	Regulation of APC/C activators between G1/S and early anaphase	79	4	0.303035	13.1998	+	0.000288602	UBE2C, PLK1, BUB1B, CDK1	ENSG00000175063, ENSG00000166851, ENSG00000156970, ENSG00000170312
2	APC/C-mediated degradation of cell cycle proteins	85	7	0.32605	21.4691	+	6.12311e-08	UBE2C, NEK2, PLK1, BUB1B, AURKA, CDK1, AURKB	ENSG00000175063, ENSG00000117650, ENSG00000166851, ENSG00000156970, ENSG00000087586, ENSG00000170312, ENSG00000178999
3	Regulation of mitotic cell cycle	85	7	0.32605	21.4691	+	6.12311e-08	UBE2C, NEK2, PLK1, BUB1B, AURKA, CDK1, AURKB	ENSG00000175063, ENSG00000117650, ENSG00000166851, ENSG00000156970, ENSG00000087586, ENSG00000170312, ENSG00000178999
4	Cell Cycle, Mitotic	494	18	1.89493	9.49905	+	6.22599e-13	UBE2C, BUB1B, TYMS, CDK1, CDC7, AURKB, VRK1, BUB1, CDC25A, NEK2, PLK1, RRM2, AURKA, POLE, TK1, PKMYT1, PLK4, POLA2	ENSG00000175063, ENSG00000156970, ENSG00000176890, ENSG00000170312, ENSG00000097046, ENSG00000178999, ENSG00000100749, ENSG00000169679, ENSG00000164045, ENSG00000117650, ENSG00000166851, ENSG00000171848, ENSG00000087586, ENSG00000177084, ENSG00000167900, ENSG00000127564, ENSG00000142731, ENSG00000014138
0	Activation of NIMA Kinases NEK9, NEK6, NEK7	7	2	0.0268512	74.4846	+	0.000510087	PLK1, CDK1	ENSG00000166851, ENSG00000170312
1	Nuclear Envelope Breakdown	47	3	0.180286	16.6402	+	0.000924883	VRK1, PLK1, CDK1	ENSG00000100749, ENSG00000166851, ENSG00000170312
3	M Phase	352	9	1.35023	6.66553	+	9.58657e-06	VRK1, BUB1, UBE2C, NEK2, PLK1, BUB1B, CDK1, PLK4, AURKB	ENSG00000100749, ENSG00000169679, ENSG00000175063, ENSG00000117650, ENSG00000166851, ENSG00000156970, ENSG00000170312, ENSG00000142731, ENSG00000178999
0	Telomere C-strand synthesis initiation	8	2	0.0306871	65.1741	+	0.000636028	POLE, POLA2	ENSG00000177084, ENSG00000014138
0	DNA replication initiation	8	2	0.0306871	65.1741	+	0.000636028	POLE, POLA2	ENSG00000177084, ENSG00000014138
0	Polo-like kinase mediated events	16	3	0.0613741	48.8805	+	4.9792e-05	CDC25A, PLK1, PKMYT1	ENSG00000164045, ENSG00000166851, ENSG00000127564
1	G2/M Transition	193	7	0.740325	9.4553	+	1.14836e-05	CDC25A, NEK2, PLK1, AURKA, CDK1, PKMYT1, PLK4	ENSG00000164045, ENSG00000117650, ENSG00000166851, ENSG00000087586, ENSG00000170312, ENSG00000127564, ENSG00000142731
2	Mitotic G2-G2/M phases	195	7	0.747997	9.35833	+	1.22502e-05	CDC25A, NEK2, PLK1, AURKA, CDK1, PKMYT1, PLK4	ENSG00000164045, ENSG00000117650, ENSG00000166851, ENSG00000087586, ENSG00000170312, ENSG00000127564, ENSG00000142731
0	Sodium/Calcium exchangers	11	2	0.0421947	47.3993	+	0.00109428	SLC8A1, CALM1	ENSG00000183023, ENSG00000198668
1	Transport of inorganic cations/anions and amino acids/oligopeptides	105	4	0.402768	9.93128	+	0.000810596	SLC38A5, SLC8A1, CALM1, SLC25A10	ENSG00000017483, ENSG00000183023, ENSG00000198668, ENSG00000183048
2	SLC-mediated transmembrane transport	248	8	0.951299	8.40955	+	6.05404e-06	SLC29A1, SLC27A4, SLC38A5, SLC8A1, CALM1, SLC25A10, SLC2A6, SLC22A4	ENSG00000112759, ENSG00000167114, ENSG00000017483, ENSG00000183023, ENSG00000198668, ENSG00000183048, ENSG00000160326, ENSG00000197208
0	Reduction of cytosolic Ca++ levels	12	2	0.0460306	43.4494	+	0.00127349	SLC8A1, CALM1	ENSG00000183023, ENSG00000198668
0	CREB1 phosphorylation through the activation of Adenylate Cyclase	12	2	0.0460306	43.4494	+	0.00127349	PRKAR1B, CALM1	ENSG00000188191, ENSG00000198668
0	Cyclin A/B1/B2 associated events during G2/M transition	25	4	0.0958971	41.7114	+	4.36119e-06	CDC25A, PLK1, CDK1, PKMYT1	ENSG00000164045, ENSG00000166851, ENSG00000170312, ENSG00000127564
0	Phosphorylation of the APC/C	19	3	0.0728818	41.1626	+	7.84816e-05	UBE2C, PLK1, CDK1	ENSG00000175063, ENSG00000166851, ENSG00000170312
1	Activation of APC/C and APC/C:Cdc20 mediated degradation of mitotic proteins	75	5	0.287691	17.3797	+	1.37705e-05	UBE2C, NEK2, PLK1, BUB1B, CDK1	ENSG00000175063, ENSG00000117650, ENSG00000166851, ENSG00000156970, ENSG00000170312
0	Golgi Cisternae Pericentriolar Stack Reorganization	13	2	0.0498665	40.1071	+	0.00146578	PLK1, CDK1	ENSG00000166851, ENSG00000170312
0	G1/S-Specific Transcription	28	4	0.107405	37.2423	+	6.54581e-06	RRM2, TYMS, CDK1, TK1	ENSG00000171848, ENSG00000176890, ENSG00000170312, ENSG00000167900
1	G1/S Transition	130	8	0.498665	16.0428	+	5.62592e-08	CDC25A, RRM2, TYMS, POLE, CDK1, CDC7, TK1, POLA2	ENSG00000164045, ENSG00000171848, ENSG00000176890, ENSG00000177084, ENSG00000170312, ENSG00000097046, ENSG00000167900, ENSG00000014138
2	Mitotic G1 phase and G1/S transition	147	8	0.563875	14.1875	+	1.3843e-07	CDC25A, RRM2, TYMS, POLE, CDK1, CDC7, TK1, POLA2	ENSG00000164045, ENSG00000171848, ENSG00000176890, ENSG00000177084, ENSG00000170312, ENSG00000097046, ENSG00000167900, ENSG00000014138
0	APC-Cdc20 mediated degradation of Nek2A	25	3	0.0958971	31.2835	+	0.000164217	UBE2C, NEK2, BUB1B	ENSG00000175063, ENSG00000117650, ENSG00000156970
1	APC:Cdc20 mediated degradation of cell cycle proteins prior to satisfation of the cell cycle checkpoint	72	4	0.276184	14.4831	+	0.000205609	UBE2C, NEK2, BUB1B, CDK1	ENSG00000175063, ENSG00000117650, ENSG00000156970, ENSG00000170312
2	APC/C:Cdc20 mediated degradation of mitotic proteins	74	4	0.283855	14.0917	+	0.000227281	UBE2C, NEK2, BUB1B, CDK1	ENSG00000175063, ENSG00000117650, ENSG00000156970, ENSG00000170312
0	Interconversion of nucleotide di- and triphosphates	28	3	0.107405	27.9317	+	0.000223471	RRM2, TYMS, AK5	ENSG00000171848, ENSG00000176890, ENSG00000154027
1	Metabolism of nucleotides	94	8	0.360573	22.1869	+	5.19169e-09	PNP, NT5E, RRM2, TYMS, CAD, TK1, PFAS, AK5	ENSG00000198805, ENSG00000135318, ENSG00000171848, ENSG00000176890, ENSG00000084774, ENSG00000167900, ENSG00000178921, ENSG00000154027
0	Synthesis of active ubiquitin: roles of E1 and E2 enzymes	30	3	0.115076	26.0696	+	0.000269759	UBE2C, UBE2S, UBE2T	ENSG00000175063, ENSG00000108106, ENSG00000077152
0	Activation of the pre-replicative complex	33	3	0.126584	23.6997	+	0.000350122	POLE, CDC7, POLA2	ENSG00000177084, ENSG00000097046, ENSG00000014138
0	Transcriptional Regulation by E2F6	34	3	0.13042	23.0026	+	0.00037997	RRM2, CDC7, EZH2	ENSG00000171848, ENSG00000097046, ENSG00000106462
0	AURKA Activation by TPX2	71	5	0.272348	18.3589	+	1.07095e-05	NEK2, PLK1, AURKA, CDK1, PLK4	ENSG00000117650, ENSG00000166851, ENSG00000087586, ENSG00000170312, ENSG00000142731
0	PKMTs methylate histone lysines	47	3	0.180286	16.6402	+	0.000924883	SUV39H1, EZH2, NSD2	ENSG00000101945, ENSG00000106462, ENSG00000109685
0	Loss of Nlp from mitotic centrosomes	68	4	0.26084	15.3351	+	0.000166791	NEK2, PLK1, CDK1, PLK4	ENSG00000117650, ENSG00000166851, ENSG00000170312, ENSG00000142731
1	Loss of proteins required for interphase microtubule organization from the centrosome	68	4	0.26084	15.3351	+	0.000166791	NEK2, PLK1, CDK1, PLK4	ENSG00000117650, ENSG00000166851, ENSG00000170312, ENSG00000142731
2	Centrosome maturation	80	4	0.306871	13.0348	+	0.000302158	NEK2, PLK1, CDK1, PLK4	ENSG00000117650, ENSG00000166851, ENSG00000170312, ENSG00000142731
0	Regulation of PLK1 Activity at G2/M Transition	85	5	0.32605	15.3351	+	2.44364e-05	NEK2, PLK1, AURKA, CDK1, PLK4	ENSG00000117650, ENSG00000166851, ENSG00000087586, ENSG00000170312, ENSG00000142731
0	PLC beta mediated events	52	3	0.199466	15.0402	+	0.00122112	PLCB3, PRKAR1B, CALM1	ENSG00000149782, ENSG00000188191, ENSG00000198668
1	G-protein mediated events	53	3	0.203302	14.7564	+	0.00128671	PLCB3, PRKAR1B, CALM1	ENSG00000149782, ENSG00000188191, ENSG00000198668
0	APC/C:Cdh1 mediated degradation of Cdc20 and other APC/C:Cdh1 targeted proteins in late mitosis/early G1	71	4	0.272348	14.6871	+	0.000195351	UBE2C, PLK1, AURKA, AURKB	ENSG00000175063, ENSG00000166851, ENSG00000087586, ENSG00000178999
0	Recruitment of mitotic centrosome proteins and complexes	80	4	0.306871	13.0348	+	0.000302158	NEK2, PLK1, CDK1, PLK4	ENSG00000117650, ENSG00000166851, ENSG00000170312, ENSG00000142731
0	Recruitment of NuMA to mitotic centrosomes	92	4	0.352901	11.3346	+	0.000502509	NEK2, PLK1, CDK1, PLK4	ENSG00000117650, ENSG00000166851, ENSG00000170312, ENSG00000142731
1	Mitotic Prometaphase	197	7	0.755669	9.26332	+	1.30587e-05	BUB1, NEK2, PLK1, BUB1B, CDK1, PLK4, AURKB	ENSG00000169679, ENSG00000117650, ENSG00000166851, ENSG00000156970, ENSG00000170312, ENSG00000142731, ENSG00000178999
0	Amplification of signal from unattached kinetochores via a MAD2 inhibitory signal	92	4	0.352901	11.3346	+	0.000502509	BUB1, PLK1, BUB1B, AURKB	ENSG00000169679, ENSG00000166851, ENSG00000156970, ENSG00000178999
1	Amplification of signal from the kinetochores	92	4	0.352901	11.3346	+	0.000502509	BUB1, PLK1, BUB1B, AURKB	ENSG00000169679, ENSG00000166851, ENSG00000156970, ENSG00000178999
2	Mitotic Spindle Checkpoint	108	5	0.414275	12.0693	+	7.28841e-05	BUB1, UBE2C, PLK1, BUB1B, AURKB	ENSG00000169679, ENSG00000175063, ENSG00000166851, ENSG00000156970, ENSG00000178999
0	Anchoring of the basal body to the plasma membrane	96	4	0.368245	10.8623	+	0.000586357	NEK2, PLK1, CDK1, PLK4	ENSG00000117650, ENSG00000166851, ENSG00000170312, ENSG00000142731
0	Resolution of Sister Chromatid Cohesion	121	5	0.464142	10.7726	+	0.000122007	BUB1, PLK1, BUB1B, CDK1, AURKB	ENSG00000169679, ENSG00000166851, ENSG00000156970, ENSG00000170312, ENSG00000178999
0	EML4 and NUDC in mitotic spindle formation	113	4	0.433455	9.22818	+	0.00105562	BUB1, PLK1, BUB1B, AURKB	ENSG00000169679, ENSG00000166851, ENSG00000156970, ENSG00000178999
0	Epigenetic regulation of gene expression	115	4	0.441126	9.06769	+	0.00112417	SUV39H1, UHRF1, MYBBP1A, EZH2	ENSG00000101945, ENSG00000276043, ENSG00000132382, ENSG00000106462
0	Metabolism of water-soluble vitamins and cofactors	120	4	0.460306	8.68987	+	0.00130913	NT5E, SLC19A1, ENPP1, SLC25A19	ENSG00000135318, ENSG00000173638, ENSG00000197594, ENSG00000125454
1	Metabolism of vitamins and cofactors	186	5	0.713474	7.00796	+	0.000827855	NT5E, SLC19A1, ENPP1, CALM1, SLC25A19	ENSG00000135318, ENSG00000173638, ENSG00000197594, ENSG00000198668, ENSG00000125454
0	Separation of Sister Chromatids	184	5	0.705802	7.08414	+	0.000789629	BUB1, UBE2C, PLK1, BUB1B, AURKB	ENSG00000169679, ENSG00000175063, ENSG00000166851, ENSG00000156970, ENSG00000178999
1	Mitotic Anaphase	192	6	0.736489	8.14676	+	0.000111247	VRK1, BUB1, UBE2C, PLK1, BUB1B, AURKB	ENSG00000100749, ENSG00000169679, ENSG00000175063, ENSG00000166851, ENSG00000156970, ENSG00000178999
2	Mitotic Metaphase and Anaphase	193	6	0.740325	8.10455	+	0.00011436	VRK1, BUB1, UBE2C, PLK1, BUB1B, AURKB	ENSG00000100749, ENSG00000169679, ENSG00000175063, ENSG00000166851, ENSG00000156970, ENSG00000178999
0	RHO GTPase Effectors	286	7	1.09706	6.38068	+	0.000129618	CIT, BUB1, PLK1, BUB1B, CALM1, PAK3, AURKB	ENSG00000122966, ENSG00000169679, ENSG00000166851, ENSG00000156970, ENSG00000198668, ENSG00000077264, ENSG00000178999
1	Signaling by Rho GTPases	416	7	1.59573	4.38671	+	0.00116687	CIT, BUB1, PLK1, BUB1B, CALM1, PAK3, AURKB	ENSG00000122966, ENSG00000169679, ENSG00000166851, ENSG00000156970, ENSG00000198668, ENSG00000077264, ENSG00000178999
0	Metabolism of carbohydrates	286	6	1.09706	5.46915	+	0.000883833	UGP2, PFKP, CALM1, SLC25A10, B3GALT2, PGP	ENSG00000169764, ENSG00000067057, ENSG00000198668, ENSG00000183048, ENSG00000162630, ENSG00000184207

## Sheet: Other genes up
Level	Term	Background rank	Found rank	Expected rank	Fold enrichment	Sign	P-value	Gene symbols	ENSEMBL IDs
0	Antagonism of Activin by Follistatin	4	3	0.0623452	48.1192	+	0.000119739	INHBB, FST, INHBA	ENSG00000163083, ENSG00000134363, ENSG00000122641
0	ECM proteoglycans	76	10	1.18456	8.44196	+	7.95619e-07	COMP, LAMA4, FMOD, COL4A3, LUM, COL4A4, ASPN, LAMA2, DCN, IBSP	ENSG00000105664, ENSG00000112769, ENSG00000122176, ENSG00000169031, ENSG00000139329, ENSG00000081052, ENSG00000106819, ENSG00000196569, ENSG00000011465, ENSG00000029559
0	Interferon alpha/beta signaling	67	7	1.04428	6.70317	+	0.000140156	IFITM3, BST2, HLA-F, SAMHD1, GBP2, IFITM1, SOCS3	ENSG00000142089, ENSG00000130303, ENSG00000204642, ENSG00000101347, ENSG00000162645, ENSG00000185885, ENSG00000184557
2	Cytokine Signaling in Immune system	823	29	12.8275	2.26076	+	7.73142e-05	GFRA1, ANGPT1, IFNGR1, CRLF1, LIFR, IL1R1, VCAM1, IFITM3, FGF7, IL1R2, LBP, CXCL8, BST2, IL18R1, IL1RL1, APBB1IP, MMP1, TNFRSF1B, PELI1, CSF1, HLA-F, SAMHD1, GBP2, IFITM1, SOCS3, RAP1B, STX3, EREG, CDKN1A	ENSG00000151892, ENSG00000154188, ENSG00000027697, ENSG00000006016, ENSG00000113594, ENSG00000115594, ENSG00000162692, ENSG00000142089, ENSG00000140285, ENSG00000115590, ENSG00000129988, ENSG00000169429, ENSG00000130303, ENSG00000115604, ENSG00000115602, ENSG00000077420, ENSG00000196611, ENSG00000028137, ENSG00000197329, ENSG00000184371, ENSG00000204642, ENSG00000101347, ENSG00000162645, ENSG0000…
0	Regulation of Complement cascade	112	10	1.74567	5.72847	+	1.90408e-05	C7, CD55, CFI, SERPING1, PROS1, C1R, C3, C6, CFH, C1S	ENSG00000112936, ENSG00000196352, ENSG00000205403, ENSG00000149131, ENSG00000184500, ENSG00000159403, ENSG00000125730, ENSG00000039537, ENSG00000000971, ENSG00000182326
1	Complement cascade	122	11	1.90153	5.78482	+	6.70505e-06	C7, CFD, CD55, CFI, SERPING1, PROS1, CFD, C1R, C3, C6, CFH, C1S	ENSG00000112936, ENSG00000274619, ENSG00000196352, ENSG00000205403, ENSG00000149131, ENSG00000184500, ENSG00000197766, ENSG00000159403, ENSG00000125730, ENSG00000039537, ENSG00000000971, ENSG00000182326
0	Regulation of Insulin-like Growth Factor (IGF) transport and uptake by Insulin-like Growth Factor Binding Proteins (IGFBPs)	124	11	1.9327	5.69151	+	7.73965e-06	CHRDL1, RCN1, CSF1, IGF2, MELTF, MFGE8, MMP1, SCG2, PAPPA, APOL1, C3	ENSG00000101938, ENSG00000049449, ENSG00000184371, ENSG00000167244, ENSG00000163975, ENSG00000140545, ENSG00000196611, ENSG00000171951, ENSG00000182752, ENSG00000100342, ENSG00000125730
0	Platelet degranulation	127	10	1.97946	5.05188	+	5.17556e-05	SELENOP, CLEC3B, CFD, IGF2, RAB27B, SERPING1, RARRES2, SERPINA3, PROS1, CFD, A2M	ENSG00000250722, ENSG00000163815, ENSG00000274619, ENSG00000167244, ENSG00000041353, ENSG00000149131, ENSG00000106538, ENSG00000196136, ENSG00000184500, ENSG00000197766, ENSG00000175899
1	Response to elevated platelet cytosolic Ca2+	132	10	2.05739	4.86052	+	7.00919e-05	SELENOP, CLEC3B, CFD, IGF2, RAB27B, SERPING1, RARRES2, SERPINA3, PROS1, CFD, A2M	ENSG00000250722, ENSG00000163815, ENSG00000274619, ENSG00000167244, ENSG00000041353, ENSG00000149131, ENSG00000106538, ENSG00000196136, ENSG00000184500, ENSG00000197766, ENSG00000175899
0	Degradation of the extracellular matrix	140	10	2.18208	4.58278	+	0.000110825	HTRA1, COL11A1, MMP13, COL4A3, ADAMTS5, MMP1, MMP7, COL4A4, DCN, A2M	ENSG00000166033, ENSG00000060718, ENSG00000137745, ENSG00000169031, ENSG00000154736, ENSG00000196611, ENSG00000137673, ENSG00000081052, ENSG00000011465, ENSG00000175899
0	Neutrophil degranulation	478	20	7.45025	2.68447	+	9.57111e-05	CRISPLD2, BST2, CFD, CD55, STOM, ENPP4, RAB31, SERPINA3, CFD, TNFRSF1B, ABCA13, MME, CD14, CREG1, HP, METTL7A, PLAC8, ATP8B4, RAP1B, C3, PLAU	ENSG00000103196, ENSG00000130303, ENSG00000274619, ENSG00000196352, ENSG00000148175, ENSG00000001561, ENSG00000168461, ENSG00000196136, ENSG00000197766, ENSG00000028137, ENSG00000179869, ENSG00000196549, ENSG00000170458, ENSG00000143162, ENSG00000257017, ENSG00000185432, ENSG00000145287, ENSG00000104043, ENSG00000127314, ENSG00000125730, ENSG00000122861

## Sheet: Other genes down
Level	Term	Background rank	Found rank	Expected rank	Fold enrichment	Sign	P-value	Gene symbols	ENSEMBL IDs
0	Unwinding of DNA	12	8	0.186453	42.9062	+	2.95487e-10	MCM3, MCM2, MCM8, GINS1, GINS2, CDC45, MCM5, GINS4	ENSG00000112118, ENSG00000073111, ENSG00000125885, ENSG00000101003, ENSG00000131153, ENSG00000093009, ENSG00000100297, ENSG00000147536
1	DNA strand elongation	32	13	0.497208	26.146	+	9.2886e-14	RFC3, MCM3, PRIM1, MCM2, GINS2, FEN1, PRIM2, MCM8, GINS1, CDC45, MCM5, GINS4, LIG1	ENSG00000133119, ENSG00000112118, ENSG00000198056, ENSG00000073111, ENSG00000131153, ENSG00000168496, ENSG00000146143, ENSG00000125885, ENSG00000101003, ENSG00000093009, ENSG00000100297, ENSG00000147536, ENSG00000105486
2	Synthesis of DNA	118	17	1.83345	9.27211	+	2.85936e-11	RFC3, MCM3, PRIM1, ORC6, MCM2, GINS2, ORC1, FEN1, PRIM2, MCM8, GINS1, CDC45, MCM5, GINS4, CDC6, CDT1, LIG1	ENSG00000133119, ENSG00000112118, ENSG00000198056, ENSG00000091651, ENSG00000073111, ENSG00000131153, ENSG00000085840, ENSG00000168496, ENSG00000146143, ENSG00000125885, ENSG00000101003, ENSG00000093009, ENSG00000100297, ENSG00000147536, ENSG00000094804, ENSG00000167513, ENSG00000105486
3	S Phase	160	19	2.48604	7.64268	+	4.04657e-11	RFC3, MCM3, PRIM1, ORC6, MCM2, CDCA5, ESCO2, GINS2, ORC1, FEN1, PRIM2, MCM8, GINS1, CDC45, MCM5, GINS4, CDC6, CDT1, LIG1	ENSG00000133119, ENSG00000112118, ENSG00000198056, ENSG00000091651, ENSG00000073111, ENSG00000146670, ENSG00000171320, ENSG00000131153, ENSG00000085840, ENSG00000168496, ENSG00000146143, ENSG00000125885, ENSG00000101003, ENSG00000093009, ENSG00000100297, ENSG00000147536, ENSG00000094804, ENSG00000167513, ENSG00000105486
4	Cell Cycle, Mitotic	494	76	7.67565	9.90144	+	1.80449e-49	GTSE1, SKA1, MCM2, SPDL1, DBF4, TUBB2A, CENPU, FEN1, SKA1, TUBB4B, PRIM2, MCM8, KIF2C, CDC6, PTTG1, RFC3, SMC2, MCM3, PRIM1, ORC6, CEP72, CENPF, LMNB1, NUF2, TPX2, SGO2, MAD2L1, MCM5, CENPI, KIF23, CENPM, FBXO5, TUBB6, TOP2A, NDC80, ESCO2, CCNB1, CENPE, NCAPG2, SPC25, KIF20A, CCNB2, TUBG1, CDC20, KIF18A, ZWINT, CDCA8, ORC1, H2AX, H2AZ1, RANGAP1, CENPO, BIRC5, SPC24, DSN1, GINS4, ZWILCH, NCAPG, CD…	ENSG00000075218, ENSG00000262634, ENSG00000073111, ENSG00000040275, ENSG00000006634, ENSG00000137267, ENSG00000151725, ENSG00000168496, ENSG00000154839, ENSG00000188229, ENSG00000146143, ENSG00000125885, ENSG00000142945, ENSG00000094804, ENSG00000164611, ENSG00000133119, ENSG00000136824, ENSG00000112118, ENSG00000198056, ENSG00000091651, ENSG00000112877, ENSG00000117724, ENSG00000113368, ENSG0000…
0	Phosphorylation of Emi1	6	3	0.0932265	32.1797	+	0.000278353	CDC20, FBXO5, CCNB1	ENSG00000117399, ENSG00000112029, ENSG00000134057
0	Condensation of Prometaphase Chromosomes	11	5	0.170915	29.2543	+	3.09073e-06	SMC2, NCAPG, CCNB1, NCAPH, CCNB2	ENSG00000136824, ENSG00000109805, ENSG00000134057, ENSG00000121152, ENSG00000157456
1	Mitotic Prometaphase	197	43	3.06094	14.048	+	2.41774e-33	CENPI, CENPM, SKA1, SPDL1, TUBB6, NDC80, CCNB1, CENPE, SPC25, TUBB2A, CCNB2, TUBG1, CDC20, KIF18A, ZWINT, CDCA8, CENPU, SKA1, TUBB4B, RANGAP1, KIF2C, CENPO, BIRC5, SPC24, DSN1, SMC2, ZWILCH, NCAPG, CEP72, CDCA5, CENPF, HAUS8, KNL1, CENPA, TUBA1C, NUF2, TUBA1A, TUBA1B, CENPK, TUBB3, SGO2, NCAPH, MAD2L1, INCENP	ENSG00000102384, ENSG00000100162, ENSG00000262634, ENSG00000040275, ENSG00000176014, ENSG00000080986, ENSG00000134057, ENSG00000138778, ENSG00000277909, ENSG00000137267, ENSG00000157456, ENSG00000131462, ENSG00000117399, ENSG00000121621, ENSG00000122952, ENSG00000134690, ENSG00000151725, ENSG00000154839, ENSG00000188229, ENSG00000100401, ENSG00000142945, ENSG00000138092, ENSG00000089685, ENSG0000…
2	M Phase	352	52	5.46929	9.50763	+	8.09587e-33	SKA1, SPDL1, TUBB2A, CENPU, SKA1, TUBB4B, KIF2C, PTTG1, SMC2, CEP72, CENPF, LMNB1, NUF2, SGO2, MAD2L1, CENPI, KIF23, CENPM, FBXO5, TUBB6, NDC80, CCNB1, CENPE, NCAPG2, SPC25, KIF20A, CCNB2, TUBG1, CDC20, KIF18A, ZWINT, CDCA8, H2AX, H2AZ1, RANGAP1, CENPO, BIRC5, SPC24, DSN1, ZWILCH, NCAPG, CDCA5, ESPL1, HAUS8, KNL1, CENPA, TUBA1C, TUBA1A, TUBA1B, CENPK, TUBB3, NCAPH, INCENP	ENSG00000262634, ENSG00000040275, ENSG00000137267, ENSG00000151725, ENSG00000154839, ENSG00000188229, ENSG00000142945, ENSG00000164611, ENSG00000136824, ENSG00000112877, ENSG00000117724, ENSG00000113368, ENSG00000143228, ENSG00000163535, ENSG00000164109, ENSG00000102384, ENSG00000137807, ENSG00000100162, ENSG00000112029, ENSG00000176014, ENSG00000080986, ENSG00000134057, ENSG00000138778, ENSG0000…
0	E2F-enabled inhibition of pre-replication complex formation	9	4	0.13984	28.6042	+	3.44807e-05	ORC6, ORC1, CCNB1, MCM8	ENSG00000091651, ENSG00000085840, ENSG00000134057, ENSG00000125885
1	E2F mediated regulation of DNA replication	22	6	0.341831	17.5526	+	3.47179e-06	PRIM1, ORC6, ORC1, CCNB1, PRIM2, MCM8	ENSG00000198056, ENSG00000091651, ENSG00000085840, ENSG00000134057, ENSG00000146143, ENSG00000125885
2	G1/S Transition	130	15	2.01991	7.42608	+	6.74957e-09	MCM3, PRIM1, ORC6, FBXO5, MCM2, DBF4, CCNB1, MCM10, ORC1, PRIM2, MCM8, CDC45, MCM5, CDC6, CDT1	ENSG00000112118, ENSG00000198056, ENSG00000091651, ENSG00000112029, ENSG00000073111, ENSG00000006634, ENSG00000134057, ENSG00000065328, ENSG00000085840, ENSG00000146143, ENSG00000125885, ENSG00000093009, ENSG00000100297, ENSG00000094804, ENSG00000167513
3	Mitotic G1 phase and G1/S transition	147	16	2.28405	7.0051	+	4.53328e-09	MCM3, PRIM1, ORC6, FBXO5, MCM2, TOP2A, DBF4, CCNB1, MCM10, ORC1, PRIM2, MCM8, CDC45, MCM5, CDC6, CDT1	ENSG00000112118, ENSG00000198056, ENSG00000091651, ENSG00000112029, ENSG00000073111, ENSG00000131747, ENSG00000006634, ENSG00000134057, ENSG00000065328, ENSG00000085840, ENSG00000146143, ENSG00000125885, ENSG00000093009, ENSG00000100297, ENSG00000094804, ENSG00000167513
0	Activation of the pre-replicative complex	33	13	0.512746	25.3537	+	1.27713e-13	MCM3, PRIM1, ORC6, MCM2, DBF4, MCM10, ORC1, PRIM2, MCM8, CDC45, MCM5, CDC6, CDT1	ENSG00000112118, ENSG00000198056, ENSG00000091651, ENSG00000073111, ENSG00000006634, ENSG00000065328, ENSG00000085840, ENSG00000146143, ENSG00000125885, ENSG00000093009, ENSG00000100297, ENSG00000094804, ENSG00000167513
1	DNA Replication Pre-Initiation	84	13	1.30517	9.96038	+	2.90731e-09	MCM3, PRIM1, ORC6, MCM2, DBF4, MCM10, ORC1, PRIM2, MCM8, CDC45, MCM5, CDC6, CDT1	ENSG00000112118, ENSG00000198056, ENSG00000091651, ENSG00000073111, ENSG00000006634, ENSG00000065328, ENSG00000085840, ENSG00000146143, ENSG00000125885, ENSG00000093009, ENSG00000100297, ENSG00000094804, ENSG00000167513
0	Microtubule-dependent trafficking of connexons from Golgi to the plasma membrane	18	7	0.27968	25.0286	+	6.97484e-08	TUBA1C, TUBA1A, TUBB6, TUBA1B, TUBB3, TUBB4B, TUBB2A	ENSG00000167553, ENSG00000167552, ENSG00000176014, ENSG00000123416, ENSG00000258947, ENSG00000188229, ENSG00000137267
1	Transport of connexons to the plasma membrane	19	7	0.295217	23.7113	+	9.41989e-08	TUBA1C, TUBA1A, TUBB6, TUBA1B, TUBB3, TUBB4B, TUBB2A	ENSG00000167553, ENSG00000167552, ENSG00000176014, ENSG00000123416, ENSG00000258947, ENSG00000188229, ENSG00000137267
2	Gap junction assembly	36	7	0.559359	12.5143	+	3.69188e-06	TUBA1C, TUBA1A, TUBB6, TUBA1B, TUBB3, TUBB4B, TUBB2A	ENSG00000167553, ENSG00000167552, ENSG00000176014, ENSG00000123416, ENSG00000258947, ENSG00000188229, ENSG00000137267
3	Gap junction trafficking	47	7	0.730274	9.58544	+	1.75696e-05	TUBA1C, TUBA1A, TUBB6, TUBA1B, TUBB3, TUBB4B, TUBB2A	ENSG00000167553, ENSG00000167552, ENSG00000176014, ENSG00000123416, ENSG00000258947, ENSG00000188229, ENSG00000137267
4	Gap junction trafficking and regulation	48	7	0.745812	9.38574	+	1.98704e-05	TUBA1C, TUBA1A, TUBB6, TUBA1B, TUBB3, TUBB4B, TUBB2A	ENSG00000167553, ENSG00000167552, ENSG00000176014, ENSG00000123416, ENSG00000258947, ENSG00000188229, ENSG00000137267
0	CDC6 association with the ORC:origin complex	11	4	0.170915	23.4034	+	6.42519e-05	ORC6, ORC1, MCM8, CDC6	ENSG00000091651, ENSG00000085840, ENSG00000125885, ENSG00000094804
1	Assembly of the pre-replicative complex	67	8	1.04103	7.6847	+	1.906e-05	MCM3, ORC6, MCM2, ORC1, MCM8, MCM5, CDC6, CDT1	ENSG00000112118, ENSG00000091651, ENSG00000073111, ENSG00000085840, ENSG00000125885, ENSG00000100297, ENSG00000094804, ENSG00000167513
0	Post-chaperonin tubulin folding pathway	21	7	0.326293	21.4531	+	1.6516e-07	TUBA1C, TUBA1A, TUBB6, TUBA1B, TUBB3, TUBB4B, TUBB2A	ENSG00000167553, ENSG00000167552, ENSG00000176014, ENSG00000123416, ENSG00000258947, ENSG00000188229, ENSG00000137267
1	Protein folding	99	10	1.53824	6.50095	+	6.83323e-06	NOP56, TUBA1C, TUBA1A, TUBB6, TUBA1B, TUBB3, TUBB4B, GNB3, TUBB2A, WRAP53	ENSG00000101361, ENSG00000167553, ENSG00000167552, ENSG00000176014, ENSG00000123416, ENSG00000258947, ENSG00000188229, ENSG00000111664, ENSG00000137267, ENSG00000141499
0	Activation of ATR in response to replication stress	37	12	0.574897	20.8733	+	7.44974e-12	RFC3, MCM3, ORC6, MCM2, ORC1, DBF4, CLSPN, MCM8, CDC45, MCM5, MCM10, CDC6	ENSG00000133119, ENSG00000112118, ENSG00000091651, ENSG00000073111, ENSG00000085840, ENSG00000006634, ENSG00000092853, ENSG00000125885, ENSG00000093009, ENSG00000100297, ENSG00000065328, ENSG00000094804
1	G2/M Checkpoints	150	18	2.33066	7.72312	+	1.14018e-10	GTSE1, EXO1, RFC3, MCM3, ORC6, MCM2, DBF4, CCNB1, MCM10, CCNB2, ORC1, H2AX, CLSPN, MCM8, CDC45, MCM5, CDC6, BRCA1	ENSG00000075218, ENSG00000174371, ENSG00000133119, ENSG00000112118, ENSG00000091651, ENSG00000073111, ENSG00000006634, ENSG00000134057, ENSG00000065328, ENSG00000157456, ENSG00000085840, ENSG00000188486, ENSG00000092853, ENSG00000125885, ENSG00000093009, ENSG00000100297, ENSG00000094804, ENSG00000012048
2	Cell Cycle Checkpoints	270	45	4.19519	10.7266	+	2.01092e-30	GTSE1, CENPI, EXO1, CENPM, SKA1, MCM2, SPDL1, NDC80, DBF4, CCNB1, CENPE, SPC25, CCNB2, CDC20, KIF18A, ZWINT, CDCA8, CENPU, ORC1, H2AX, SKA1, RANGAP1, MCM8, KIF2C, CENPO, BIRC5, SPC24, DSN1, CDC6, BRCA1, RFC3, MCM3, ZWILCH, ORC6, CENPF, KNL1, MCM10, CENPA, NUF2, CENPK, SGO2, CLSPN, MAD2L1, CDC45, MCM5, INCENP	ENSG00000075218, ENSG00000102384, ENSG00000174371, ENSG00000100162, ENSG00000262634, ENSG00000073111, ENSG00000040275, ENSG00000080986, ENSG00000006634, ENSG00000134057, ENSG00000138778, ENSG00000277909, ENSG00000157456, ENSG00000117399, ENSG00000121621, ENSG00000122952, ENSG00000134690, ENSG00000151725, ENSG00000085840, ENSG00000188486, ENSG00000154839, ENSG00000100401, ENSG00000125885, ENSG0000…
0	Kinesins	60	19	0.932265	20.3805	+	7.29854e-18	KIF23, TUBB6, KIFC1, CENPE, KIF20A, TUBB2A, KIF18B, TUBA1C, KIF18A, KIF20B, KIF11, TUBA1A, TUBA1B, TUBB3, TUBB4B, KIF2C, RACGAP1, KIF22, KIF4A	ENSG00000137807, ENSG00000176014, ENSG00000237649, ENSG00000138778, ENSG00000112984, ENSG00000137267, ENSG00000186185, ENSG00000167553, ENSG00000121621, ENSG00000138182, ENSG00000138160, ENSG00000167552, ENSG00000123416, ENSG00000258947, ENSG00000188229, ENSG00000142945, ENSG00000161800, ENSG00000079616, ENSG00000090889
1	Factors involved in megakaryocyte development and platelet production	156	21	2.42389	8.66376	+	4.18183e-13	KIF23, DOCK10, TUBB6, KIFC1, CENPE, KIF20A, TUBB2A, KIF18B, TUBA1C, KIF18A, KIF20B, KIF11, TUBA1A, TUBA1B, TUBB3, TUBB4B, KIF2C, RACGAP1, KIF22, KIF4A, EHD3	ENSG00000137807, ENSG00000135905, ENSG00000176014, ENSG00000237649, ENSG00000138778, ENSG00000112984, ENSG00000137267, ENSG00000186185, ENSG00000167553, ENSG00000121621, ENSG00000138182, ENSG00000138160, ENSG00000167552, ENSG00000123416, ENSG00000258947, ENSG00000188229, ENSG00000142945, ENSG00000161800, ENSG00000079616, ENSG00000090889, ENSG00000013016
0	Resolution of Sister Chromatid Cohesion	121	37	1.88007	19.6801	+	2.68147e-33	CENPI, CENPM, SKA1, SPDL1, TUBB6, NDC80, CCNB1, CENPE, SPC25, TUBB2A, CCNB2, CDC20, KIF18A, ZWINT, CDCA8, CENPU, SKA1, TUBB4B, RANGAP1, KIF2C, CENPO, BIRC5, SPC24, DSN1, ZWILCH, CDCA5, CENPF, KNL1, CENPA, TUBA1C, NUF2, TUBA1A, TUBA1B, CENPK, TUBB3, SGO2, MAD2L1, INCENP	ENSG00000102384, ENSG00000100162, ENSG00000262634, ENSG00000040275, ENSG00000176014, ENSG00000080986, ENSG00000134057, ENSG00000138778, ENSG00000277909, ENSG00000137267, ENSG00000157456, ENSG00000117399, ENSG00000121621, ENSG00000122952, ENSG00000134690, ENSG00000151725, ENSG00000154839, ENSG00000188229, ENSG00000100401, ENSG00000142945, ENSG00000138092, ENSG00000089685, ENSG00000161888, ENSG0000…
0	EML4 and NUDC in mitotic spindle formation	113	34	1.75577	19.3648	+	1.82709e-30	CENPI, CENPM, SKA1, SPDL1, TUBB6, NDC80, CENPE, SPC25, TUBB2A, CDC20, KIF18A, ZWINT, CDCA8, CENPU, SKA1, TUBB4B, RANGAP1, KIF2C, CENPO, BIRC5, SPC24, DSN1, ZWILCH, CENPF, KNL1, CENPA, TUBA1C, NUF2, TUBA1A, TUBA1B, CENPK, TUBB3, SGO2, MAD2L1, INCENP	ENSG00000102384, ENSG00000100162, ENSG00000262634, ENSG00000040275, ENSG00000176014, ENSG00000080986, ENSG00000138778, ENSG00000277909, ENSG00000137267, ENSG00000117399, ENSG00000121621, ENSG00000122952, ENSG00000134690, ENSG00000151725, ENSG00000154839, ENSG00000188229, ENSG00000100401, ENSG00000142945, ENSG00000138092, ENSG00000089685, ENSG00000161888, ENSG00000149636, ENSG00000174442, ENSG0000…
0	Amplification of signal from unattached kinetochores via a MAD2 inhibitory signal	92	27	1.42947	18.8881	+	3.7456e-24	CENPI, CENPM, SKA1, SPDL1, NDC80, CENPE, SPC25, CDC20, KIF18A, ZWINT, CDCA8, CENPU, SKA1, RANGAP1, KIF2C, CENPO, BIRC5, SPC24, DSN1, ZWILCH, CENPF, KNL1, CENPA, NUF2, CENPK, SGO2, MAD2L1, INCENP	ENSG00000102384, ENSG00000100162, ENSG00000262634, ENSG00000040275, ENSG00000080986, ENSG00000138778, ENSG00000277909, ENSG00000117399, ENSG00000121621, ENSG00000122952, ENSG00000134690, ENSG00000151725, ENSG00000154839, ENSG00000100401, ENSG00000142945, ENSG00000138092, ENSG00000089685, ENSG00000161888, ENSG00000149636, ENSG00000174442, ENSG00000117724, ENSG00000137812, ENSG00000115163, ENSG0000…
1	Amplification of signal from the kinetochores	92	27	1.42947	18.8881	+	3.7456e-24	CENPI, CENPM, SKA1, SPDL1, NDC80, CENPE, SPC25, CDC20, KIF18A, ZWINT, CDCA8, CENPU, SKA1, RANGAP1, KIF2C, CENPO, BIRC5, SPC24, DSN1, ZWILCH, CENPF, KNL1, CENPA, NUF2, CENPK, SGO2, MAD2L1, INCENP	ENSG00000102384, ENSG00000100162, ENSG00000262634, ENSG00000040275, ENSG00000080986, ENSG00000138778, ENSG00000277909, ENSG00000117399, ENSG00000121621, ENSG00000122952, ENSG00000134690, ENSG00000151725, ENSG00000154839, ENSG00000100401, ENSG00000142945, ENSG00000138092, ENSG00000089685, ENSG00000161888, ENSG00000149636, ENSG00000174442, ENSG00000117724, ENSG00000137812, ENSG00000115163, ENSG0000…
2	Mitotic Spindle Checkpoint	108	27	1.67808	16.0898	+	1.3643e-22	CENPI, CENPM, SKA1, SPDL1, NDC80, CENPE, SPC25, CDC20, KIF18A, ZWINT, CDCA8, CENPU, SKA1, RANGAP1, KIF2C, CENPO, BIRC5, SPC24, DSN1, ZWILCH, CENPF, KNL1, CENPA, NUF2, CENPK, SGO2, MAD2L1, INCENP	ENSG00000102384, ENSG00000100162, ENSG00000262634, ENSG00000040275, ENSG00000080986, ENSG00000138778, ENSG00000277909, ENSG00000117399, ENSG00000121621, ENSG00000122952, ENSG00000134690, ENSG00000151725, ENSG00000154839, ENSG00000100401, ENSG00000142945, ENSG00000138092, ENSG00000089685, ENSG00000161888, ENSG00000149636, ENSG00000174442, ENSG00000117724, ENSG00000137812, ENSG00000115163, ENSG0000…
0	Formation of tubulin folding intermediates by CCT/TriC	24	7	0.372906	18.7715	+	3.52623e-07	TUBA1C, TUBA1A, TUBB6, TUBA1B, TUBB3, TUBB4B, TUBB2A	ENSG00000167553, ENSG00000167552, ENSG00000176014, ENSG00000123416, ENSG00000258947, ENSG00000188229, ENSG00000137267
1	Cooperation of Prefoldin and TriC/CCT in actin and tubulin folding	31	7	0.48167	14.5328	+	1.54383e-06	TUBA1C, TUBA1A, TUBB6, TUBA1B, TUBB3, TUBB4B, TUBB2A	ENSG00000167553, ENSG00000167552, ENSG00000176014, ENSG00000123416, ENSG00000258947, ENSG00000188229, ENSG00000137267
2	Chaperonin-mediated protein folding	93	10	1.44501	6.92036	+	4.09927e-06	NOP56, TUBA1C, TUBA1A, TUBB6, TUBA1B, TUBB3, TUBB4B, GNB3, TUBB2A, WRAP53	ENSG00000101361, ENSG00000167553, ENSG00000167552, ENSG00000176014, ENSG00000123416, ENSG00000258947, ENSG00000188229, ENSG00000111664, ENSG00000137267, ENSG00000141499
0	Metallothioneins bind metals	11	3	0.170915	17.5526	+	0.00113956	MT2A, MT1X, MT1E	ENSG00000125148, ENSG00000187193, ENSG00000169715
1	Response to metal ions	14	3	0.217529	13.7913	+	0.00205769	MT2A, MT1X, MT1E	ENSG00000125148, ENSG00000187193, ENSG00000169715
0	Activation of AMPK downstream of NMDARs	26	7	0.403982	17.3275	+	5.5803e-07	TUBA1C, TUBA1A, TUBB6, TUBA1B, TUBB3, TUBB4B, TUBB2A	ENSG00000167553, ENSG00000167552, ENSG00000176014, ENSG00000123416, ENSG00000258947, ENSG00000188229, ENSG00000137267
1	Post NMDA receptor activation events	75	9	1.16533	7.72312	+	5.52472e-06	TUBA1C, KPNA2, TUBA1A, TUBB6, TUBA1B, TUBB3, TUBB4B, NRG1, TUBB2A	ENSG00000167553, ENSG00000182481, ENSG00000167552, ENSG00000176014, ENSG00000123416, ENSG00000258947, ENSG00000188229, ENSG00000157168, ENSG00000137267
2	Activation of NMDA receptors and postsynaptic events	87	9	1.35178	6.65787	+	1.65748e-05	TUBA1C, KPNA2, TUBA1A, TUBB6, TUBA1B, TUBB3, TUBB4B, NRG1, TUBB2A	ENSG00000167553, ENSG00000182481, ENSG00000167552, ENSG00000176014, ENSG00000123416, ENSG00000258947, ENSG00000188229, ENSG00000157168, ENSG00000137267
3	Neurotransmitter receptors and postsynaptic signal transmission	195	10	3.02986	3.30048	+	0.00128084	TUBA1C, KPNA2, TUBA1A, TUBB6, TUBA1B, TUBB3, TUBB4B, NRG1, GNB3, TUBB2A	ENSG00000167553, ENSG00000182481, ENSG00000167552, ENSG00000176014, ENSG00000123416, ENSG00000258947, ENSG00000188229, ENSG00000157168, ENSG00000111664, ENSG00000137267
0	RHO GTPases activate IQGAPs	30	8	0.466133	17.1625	+	9.02608e-08	IQGAP3, TUBA1C, TUBA1A, TUBB6, TUBA1B, TUBB3, TUBB4B, TUBB2A	ENSG00000183856, ENSG00000167553, ENSG00000167552, ENSG00000176014, ENSG00000123416, ENSG00000258947, ENSG00000188229, ENSG00000137267
1	RHO GTPase Effectors	286	42	4.4438	9.45138	+	1.75537e-26	CENPI, CENPM, SKA1, SPDL1, TUBB6, KIF14, NDC80, CENPE, SPC25, PRC1, TUBB2A, CDC20, KIF18A, ZWINT, CDCA8, CENPU, H2AX, H2AZ1, SKA1, TUBB4B, RANGAP1, KIF2C, CENPO, BIRC5, SPC24, DSN1, IQGAP3, ZWILCH, RAC2, DIAPH3, CENPF, KNL1, CENPA, TUBA1C, NUF2, NF2, TUBA1A, TUBA1B, CENPK, TUBB3, SGO2, MAD2L1, INCENP	ENSG00000102384, ENSG00000100162, ENSG00000262634, ENSG00000040275, ENSG00000176014, ENSG00000118193, ENSG00000080986, ENSG00000138778, ENSG00000277909, ENSG00000198901, ENSG00000137267, ENSG00000117399, ENSG00000121621, ENSG00000122952, ENSG00000134690, ENSG00000151725, ENSG00000188486, ENSG00000164032, ENSG00000154839, ENSG00000188229, ENSG00000100401, ENSG00000142945, ENSG00000138092, ENSG0000…
2	Signaling by Rho GTPases	416	48	6.4637	7.42608	+	5.48415e-26	SKA1, SPDL1, KIF14, ECT2, PRC1, TUBB2A, ARHGAP11A, CENPU, SKA1, TUBB4B, KIF2C, DIAPH3, CENPF, NUF2, SGO2, MAD2L1, ARHGAP18, CENPI, CENPM, TUBB6, PLEKHG5, NDC80, CENPE, SPC25, CDC20, KIF18A, ZWINT, CDCA8, H2AX, H2AZ1, RANGAP1, CENPO, BIRC5, SPC24, RACGAP1, DSN1, IQGAP3, ZWILCH, RAC2, KNL1, CENPA, TUBA1C, DEPDC1B, NF2, TUBA1A, TUBA1B, CENPK, TUBB3, INCENP	ENSG00000262634, ENSG00000040275, ENSG00000118193, ENSG00000114346, ENSG00000198901, ENSG00000137267, ENSG00000198826, ENSG00000151725, ENSG00000154839, ENSG00000188229, ENSG00000142945, ENSG00000139734, ENSG00000117724, ENSG00000143228, ENSG00000163535, ENSG00000164109, ENSG00000146376, ENSG00000102384, ENSG00000100162, ENSG00000176014, ENSG00000171680, ENSG00000080986, ENSG00000138778, ENSG0000…
0	RHO GTPases Activate Formins	134	35	2.08206	16.8103	+	1.49855e-29	CENPI, CENPM, SKA1, SPDL1, TUBB6, NDC80, CENPE, SPC25, TUBB2A, CDC20, KIF18A, ZWINT, CDCA8, CENPU, SKA1, TUBB4B, RANGAP1, KIF2C, CENPO, BIRC5, SPC24, DSN1, ZWILCH, DIAPH3, CENPF, KNL1, CENPA, TUBA1C, NUF2, TUBA1A, TUBA1B, CENPK, TUBB3, SGO2, MAD2L1, INCENP	ENSG00000102384, ENSG00000100162, ENSG00000262634, ENSG00000040275, ENSG00000176014, ENSG00000080986, ENSG00000138778, ENSG00000277909, ENSG00000137267, ENSG00000117399, ENSG00000121621, ENSG00000122952, ENSG00000134690, ENSG00000151725, ENSG00000154839, ENSG00000188229, ENSG00000100401, ENSG00000142945, ENSG00000138092, ENSG00000089685, ENSG00000161888, ENSG00000149636, ENSG00000174442, ENSG0000…
0	Prefoldin mediated transfer of substrate to CCT/TriC	26	6	0.403982	14.8522	+	7.93144e-06	TUBA1C, TUBA1A, TUBB6, TUBB3, TUBB4B, TUBB2A	ENSG00000167553, ENSG00000167552, ENSG00000176014, ENSG00000258947, ENSG00000188229, ENSG00000137267
0	Deposition of new CENPA-containing nucleosomes at the centromere	54	12	0.839039	14.3021	+	3.15073e-10	CENPI, CENPM, CENPA, OIP5, CENPU, H2AX, H2AZ1, CENPK, CENPO, CENPW, KNL1, HJURP	ENSG00000102384, ENSG00000100162, ENSG00000115163, ENSG00000104147, ENSG00000151725, ENSG00000188486, ENSG00000164032, ENSG00000123219, ENSG00000138092, ENSG00000203760, ENSG00000137812, ENSG00000123485
1	Nucleosome assembly	54	12	0.839039	14.3021	+	3.15073e-10	CENPI, CENPM, CENPA, OIP5, CENPU, H2AX, H2AZ1, CENPK, CENPO, CENPW, KNL1, HJURP	ENSG00000102384, ENSG00000100162, ENSG00000115163, ENSG00000104147, ENSG00000151725, ENSG00000188486, ENSG00000164032, ENSG00000123219, ENSG00000138092, ENSG00000203760, ENSG00000137812, ENSG00000123485
2	Chromosome Maintenance	90	18	1.3984	12.8719	+	5.25961e-14	CENPI, RFC3, CENPM, OIP5, PRIM1, CENPW, KNL1, CENPA, CENPU, H2AX, H2AZ1, FEN1, CENPK, PRIM2, CENPO, WRAP53, HJURP, LIG1	ENSG00000102384, ENSG00000133119, ENSG00000100162, ENSG00000104147, ENSG00000198056, ENSG00000203760, ENSG00000137812, ENSG00000115163, ENSG00000151725, ENSG00000188486, ENSG00000164032, ENSG00000168496, ENSG00000123219, ENSG00000146143, ENSG00000138092, ENSG00000141499, ENSG00000123485, ENSG00000105486
0	Polymerase switching on the C-strand of the telomere	14	3	0.217529	13.7913	+	0.00205769	RFC3, PRIM1, PRIM2	ENSG00000133119, ENSG00000198056, ENSG00000146143
1	Telomere C-strand (Lagging Strand) Synthesis	24	5	0.372906	13.4082	+	7.1369e-05	RFC3, PRIM1, FEN1, PRIM2, LIG1	ENSG00000133119, ENSG00000198056, ENSG00000168496, ENSG00000146143, ENSG00000105486
2	Extension of Telomeres	30	6	0.466133	12.8719	+	1.61926e-05	RFC3, PRIM1, FEN1, PRIM2, WRAP53, LIG1	ENSG00000133119, ENSG00000198056, ENSG00000168496, ENSG00000146143, ENSG00000141499, ENSG00000105486
3	Telomere Maintenance	63	8	0.978878	8.17262	+	1.26729e-05	RFC3, PRIM1, H2AX, H2AZ1, FEN1, PRIM2, WRAP53, LIG1	ENSG00000133119, ENSG00000198056, ENSG00000188486, ENSG00000164032, ENSG00000168496, ENSG00000146143, ENSG00000141499, ENSG00000105486
0	Removal of the Flap Intermediate	14	3	0.217529	13.7913	+	0.00205769	PRIM1, FEN1, PRIM2	ENSG00000198056, ENSG00000168496, ENSG00000146143
1	Processive synthesis on the lagging strand	15	4	0.233066	17.1625	+	0.000173834	PRIM1, FEN1, PRIM2, LIG1	ENSG00000198056, ENSG00000168496, ENSG00000146143, ENSG00000105486
2	Lagging Strand Synthesis	20	5	0.310755	16.0898	+	3.35726e-05	RFC3, PRIM1, FEN1, PRIM2, LIG1	ENSG00000133119, ENSG00000198056, ENSG00000168496, ENSG00000146143, ENSG00000105486
0	Polymerase switching	14	3	0.217529	13.7913	+	0.00205769	RFC3, PRIM1, PRIM2	ENSG00000133119, ENSG00000198056, ENSG00000146143
1	Leading Strand Synthesis	14	3	0.217529	13.7913	+	0.00205769	RFC3, PRIM1, PRIM2	ENSG00000133119, ENSG00000198056, ENSG00000146143
0	Separation of Sister Chromatids	184	37	2.85895	12.9418	+	1.14317e-27	CENPI, CENPM, SKA1, SPDL1, TUBB6, NDC80, CENPE, SPC25, TUBB2A, CDC20, KIF18A, ZWINT, CDCA8, CENPU, SKA1, TUBB4B, RANGAP1, KIF2C, CENPO, BIRC5, SPC24, DSN1, PTTG1, ZWILCH, CDCA5, ESPL1, CENPF, KNL1, CENPA, TUBA1C, NUF2, TUBA1A, TUBA1B, CENPK, TUBB3, SGO2, MAD2L1, INCENP	ENSG00000102384, ENSG00000100162, ENSG00000262634, ENSG00000040275, ENSG00000176014, ENSG00000080986, ENSG00000138778, ENSG00000277909, ENSG00000137267, ENSG00000117399, ENSG00000121621, ENSG00000122952, ENSG00000134690, ENSG00000151725, ENSG00000154839, ENSG00000188229, ENSG00000100401, ENSG00000142945, ENSG00000138092, ENSG00000089685, ENSG00000161888, ENSG00000149636, ENSG00000164611, ENSG0000…
1	Mitotic Anaphase	192	38	2.98325	12.7378	+	3.56038e-28	CENPI, CENPM, SKA1, SPDL1, TUBB6, NDC80, CENPE, SPC25, TUBB2A, CDC20, KIF18A, ZWINT, CDCA8, CENPU, SKA1, TUBB4B, RANGAP1, KIF2C, CENPO, BIRC5, SPC24, DSN1, PTTG1, ZWILCH, CDCA5, ESPL1, CENPF, LMNB1, KNL1, CENPA, TUBA1C, NUF2, TUBA1A, TUBA1B, CENPK, TUBB3, SGO2, MAD2L1, INCENP	ENSG00000102384, ENSG00000100162, ENSG00000262634, ENSG00000040275, ENSG00000176014, ENSG00000080986, ENSG00000138778, ENSG00000277909, ENSG00000137267, ENSG00000117399, ENSG00000121621, ENSG00000122952, ENSG00000134690, ENSG00000151725, ENSG00000154839, ENSG00000188229, ENSG00000100401, ENSG00000142945, ENSG00000138092, ENSG00000089685, ENSG00000161888, ENSG00000149636, ENSG00000164611, ENSG0000…
2	Mitotic Metaphase and Anaphase	193	39	2.99879	13.0053	+	3.40325e-29	CENPI, CENPM, SKA1, FBXO5, SPDL1, TUBB6, NDC80, CENPE, SPC25, TUBB2A, CDC20, KIF18A, ZWINT, CDCA8, CENPU, SKA1, TUBB4B, RANGAP1, KIF2C, CENPO, BIRC5, SPC24, DSN1, PTTG1, ZWILCH, CDCA5, ESPL1, CENPF, LMNB1, KNL1, CENPA, TUBA1C, NUF2, TUBA1A, TUBA1B, CENPK, TUBB3, SGO2, MAD2L1, INCENP	ENSG00000102384, ENSG00000100162, ENSG00000262634, ENSG00000112029, ENSG00000040275, ENSG00000176014, ENSG00000080986, ENSG00000138778, ENSG00000277909, ENSG00000137267, ENSG00000117399, ENSG00000121621, ENSG00000122952, ENSG00000134690, ENSG00000151725, ENSG00000154839, ENSG00000188229, ENSG00000100401, ENSG00000142945, ENSG00000138092, ENSG00000089685, ENSG00000161888, ENSG00000149636, ENSG0000…
0	Recycling pathway of L1	46	9	0.714737	12.5921	+	1.40719e-07	TUBA1C, TUBA1A, TUBB6, TUBA1B, TUBB3, TUBB4B, EZR, TUBB2A, KIF4A	ENSG00000167553, ENSG00000167552, ENSG00000176014, ENSG00000123416, ENSG00000258947, ENSG00000188229, ENSG00000092820, ENSG00000137267, ENSG00000090889
1	L1CAM interactions	117	10	1.81792	5.5008	+	2.63109e-05	TUBA1C, TUBA1A, TUBB6, TUBA1B, TUBB3, TUBB4B, EZR, CNTNAP1, TUBB2A, KIF4A	ENSG00000167553, ENSG00000167552, ENSG00000176014, ENSG00000123416, ENSG00000258947, ENSG00000188229, ENSG00000092820, ENSG00000108797, ENSG00000137267, ENSG00000090889
0	Resolution of D-loop Structures through Synthesis-Dependent Strand Annealing (SDSA)	26	5	0.403982	12.3768	+	9.95856e-05	RAD51, EXO1, XRCC2, RAD51AP1, BRCA1	ENSG00000051180, ENSG00000174371, ENSG00000196584, ENSG00000111247, ENSG00000012048
1	Resolution of D-Loop Structures	33	6	0.512746	11.7017	+	2.60969e-05	RAD51, EXO1, XRCC2, RAD51AP1, EME1, BRCA1	ENSG00000051180, ENSG00000174371, ENSG00000196584, ENSG00000111247, ENSG00000154920, ENSG00000012048
2	HDR through Homologous Recombination (HRR)	66	7	1.02549	6.82599	+	0.000126148	RAD51, EXO1, RFC3, XRCC2, RAD51AP1, EME1, BRCA1	ENSG00000051180, ENSG00000174371, ENSG00000133119, ENSG00000196584, ENSG00000111247, ENSG00000154920, ENSG00000012048
3	HDR through Homologous Recombination (HRR) or Single Strand Annealing (SSA)	114	10	1.7713	5.64556	+	2.13748e-05	RAD51, EXO1, RFC3, XRCC2, H2AX, TIMELESS, CLSPN, RAD51AP1, EME1, BRCA1	ENSG00000051180, ENSG00000174371, ENSG00000133119, ENSG00000196584, ENSG00000188486, ENSG00000111602, ENSG00000092853, ENSG00000111247, ENSG00000154920, ENSG00000012048
4	Homology Directed Repair	120	11	1.86453	5.89961	+	5.62678e-06	RAD51, EXO1, RFC3, XRCC2, H2AX, FEN1, TIMELESS, CLSPN, RAD51AP1, EME1, BRCA1	ENSG00000051180, ENSG00000174371, ENSG00000133119, ENSG00000196584, ENSG00000188486, ENSG00000168496, ENSG00000111602, ENSG00000092853, ENSG00000111247, ENSG00000154920, ENSG00000012048
5	DNA Double-Strand Break Repair	148	12	2.29959	5.21833	+	6.84344e-06	RAD51, EXO1, RFC3, KPNA2, XRCC2, H2AX, FEN1, TIMELESS, CLSPN, RAD51AP1, EME1, BRCA1	ENSG00000051180, ENSG00000174371, ENSG00000133119, ENSG00000182481, ENSG00000196584, ENSG00000188486, ENSG00000168496, ENSG00000111602, ENSG00000092853, ENSG00000111247, ENSG00000154920, ENSG00000012048
0	COPI-dependent Golgi-to-ER retrograde traffic	99	19	1.53824	12.3518	+	1.99017e-14	KIF23, TUBB6, KIFC1, CENPE, KIF20A, TUBB2A, KIF18B, TUBA1C, KIF18A, KIF20B, KIF11, TUBA1A, TUBA1B, TUBB3, TUBB4B, KIF2C, RACGAP1, KIF22, KIF4A	ENSG00000137807, ENSG00000176014, ENSG00000237649, ENSG00000138778, ENSG00000112984, ENSG00000137267, ENSG00000186185, ENSG00000167553, ENSG00000121621, ENSG00000138182, ENSG00000138160, ENSG00000167552, ENSG00000123416, ENSG00000258947, ENSG00000188229, ENSG00000142945, ENSG00000161800, ENSG00000079616, ENSG00000090889
1	Golgi-to-ER retrograde transport	133	19	2.06652	9.1942	+	2.18729e-12	KIF23, TUBB6, KIFC1, CENPE, KIF20A, TUBB2A, KIF18B, TUBA1C, KIF18A, KIF20B, KIF11, TUBA1A, TUBA1B, TUBB3, TUBB4B, KIF2C, RACGAP1, KIF22, KIF4A	ENSG00000137807, ENSG00000176014, ENSG00000237649, ENSG00000138778, ENSG00000112984, ENSG00000137267, ENSG00000186185, ENSG00000167553, ENSG00000121621, ENSG00000138182, ENSG00000138160, ENSG00000167552, ENSG00000123416, ENSG00000258947, ENSG00000188229, ENSG00000142945, ENSG00000161800, ENSG00000079616, ENSG00000090889
2	Intra-Golgi and retrograde Golgi-to-ER traffic	201	19	3.12309	6.08372	+	1.39898e-09	KIF23, TUBB6, KIFC1, CENPE, KIF20A, TUBB2A, KIF18B, TUBA1C, KIF18A, KIF20B, KIF11, TUBA1A, TUBA1B, TUBB3, TUBB4B, KIF2C, RACGAP1, KIF22, KIF4A	ENSG00000137807, ENSG00000176014, ENSG00000237649, ENSG00000138778, ENSG00000112984, ENSG00000137267, ENSG00000186185, ENSG00000167553, ENSG00000121621, ENSG00000138182, ENSG00000138160, ENSG00000167552, ENSG00000123416, ENSG00000258947, ENSG00000188229, ENSG00000142945, ENSG00000161800, ENSG00000079616, ENSG00000090889
0	Resolution of D-loop Structures through Holliday Junction Intermediates	32	6	0.497208	12.0674	+	2.23677e-05	RAD51, EXO1, XRCC2, RAD51AP1, EME1, BRCA1	ENSG00000051180, ENSG00000174371, ENSG00000196584, ENSG00000111247, ENSG00000154920, ENSG00000012048
0	G1/S-Specific Transcription	28	5	0.435057	11.4927	+	0.000135664	FBXO5, ORC1, CDC45, CDC6, CDT1	ENSG00000112029, ENSG00000085840, ENSG00000093009, ENSG00000094804, ENSG00000167513
0	Assembly and cell surface presentation of NMDA receptors	41	7	0.637048	10.9882	+	7.90095e-06	TUBA1C, TUBA1A, TUBB6, TUBA1B, TUBB3, TUBB4B, TUBB2A	ENSG00000167553, ENSG00000167552, ENSG00000176014, ENSG00000123416, ENSG00000258947, ENSG00000188229, ENSG00000137267
0	Carboxyterminal post-translational modifications of tubulin	41	7	0.637048	10.9882	+	7.90095e-06	TUBA1C, TUBA1A, TUBB6, TUBA1B, TUBB3, TUBB4B, TUBB2A	ENSG00000167553, ENSG00000167552, ENSG00000176014, ENSG00000123416, ENSG00000258947, ENSG00000188229, ENSG00000137267
0	Aggrephagy	42	7	0.652586	10.7266	+	9.09791e-06	TUBA1C, TUBA1A, TUBB6, TUBA1B, TUBB3, TUBB4B, TUBB2A	ENSG00000167553, ENSG00000167552, ENSG00000176014, ENSG00000123416, ENSG00000258947, ENSG00000188229, ENSG00000137267
1	Selective autophagy	73	7	1.13426	6.17145	+	0.000224532	TUBA1C, TUBA1A, TUBB6, TUBA1B, TUBB3, TUBB4B, TUBB2A	ENSG00000167553, ENSG00000167552, ENSG00000176014, ENSG00000123416, ENSG00000258947, ENSG00000188229, ENSG00000137267
0	COPI-independent Golgi-to-ER retrograde traffic	51	7	0.792425	8.83364	+	2.83096e-05	TUBA1C, TUBA1A, TUBB6, TUBA1B, TUBB3, TUBB4B, TUBB2A	ENSG00000167553, ENSG00000167552, ENSG00000176014, ENSG00000123416, ENSG00000258947, ENSG00000188229, ENSG00000137267
0	Intraflagellar transport	52	7	0.807963	8.66376	+	3.17037e-05	TUBA1C, TUBA1A, TUBB6, TUBA1B, TUBB3, TUBB4B, TUBB2A	ENSG00000167553, ENSG00000167552, ENSG00000176014, ENSG00000123416, ENSG00000258947, ENSG00000188229, ENSG00000137267
1	Cilium Assembly	199	10	3.09201	3.23414	+	0.00147972	TUBA1C, CEP72, TUBA1A, TUBB6, TUBA1B, TUBB3, TUBB4B, HAUS8, TUBB2A, TUBG1	ENSG00000167553, ENSG00000112877, ENSG00000167552, ENSG00000176014, ENSG00000123416, ENSG00000258947, ENSG00000188229, ENSG00000131351, ENSG00000137267, ENSG00000131462
0	The role of GTSE1 in G2/M progression after G2 checkpoint	76	10	1.18087	8.46834	+	7.73731e-07	GTSE1, TUBA1C, TUBA1A, TUBB6, TUBA1B, TUBB3, CCNB1, TUBB4B, TUBB2A, CCNB2	ENSG00000075218, ENSG00000167553, ENSG00000167552, ENSG00000176014, ENSG00000123416, ENSG00000258947, ENSG00000134057, ENSG00000188229, ENSG00000137267, ENSG00000157456
1	G2/M Transition	193	16	2.99879	5.33549	+	1.52563e-07	GTSE1, CEP72, TUBB6, CCNB1, CENPF, HAUS8, HMMR, TUBB2A, CCNB2, TUBG1, TUBA1C, TUBA1A, TUBA1B, TPX2, TUBB3, TUBB4B	ENSG00000075218, ENSG00000112877, ENSG00000176014, ENSG00000134057, ENSG00000117724, ENSG00000131351, ENSG00000072571, ENSG00000137267, ENSG00000157456, ENSG00000131462, ENSG00000167553, ENSG00000167552, ENSG00000123416, ENSG00000088325, ENSG00000258947, ENSG00000188229
2	Mitotic G2-G2/M phases	195	16	3.02986	5.28077	+	1.73847e-07	GTSE1, CEP72, TUBB6, CCNB1, CENPF, HAUS8, HMMR, TUBB2A, CCNB2, TUBG1, TUBA1C, TUBA1A, TUBA1B, TPX2, TUBB3, TUBB4B	ENSG00000075218, ENSG00000112877, ENSG00000176014, ENSG00000134057, ENSG00000117724, ENSG00000131351, ENSG00000072571, ENSG00000137267, ENSG00000157456, ENSG00000131462, ENSG00000167553, ENSG00000167552, ENSG00000123416, ENSG00000088325, ENSG00000258947, ENSG00000188229
0	MHC class II antigen presentation	124	16	1.92668	8.30444	+	4.7925e-10	KIF23, TUBB6, CENPE, KIF20A, TUBB2A, TUBA1C, KIF18A, KIF11, TUBA1A, TUBA1B, TUBB3, TUBB4B, KIF2C, RACGAP1, KIF22, KIF4A	ENSG00000137807, ENSG00000176014, ENSG00000138778, ENSG00000112984, ENSG00000137267, ENSG00000167553, ENSG00000121621, ENSG00000138160, ENSG00000167552, ENSG00000123416, ENSG00000258947, ENSG00000188229, ENSG00000142945, ENSG00000161800, ENSG00000079616, ENSG00000090889
0	Presynaptic phase of homologous DNA pairing and strand exchange	39	5	0.605972	8.2512	+	0.000541078	RAD51, EXO1, RFC3, XRCC2, BRCA1	ENSG00000051180, ENSG00000174371, ENSG00000133119, ENSG00000196584, ENSG00000012048
1	Homologous DNA Pairing and Strand Exchange	42	6	0.652586	9.1942	+	8.74459e-05	RAD51, EXO1, RFC3, XRCC2, RAD51AP1, BRCA1	ENSG00000051180, ENSG00000174371, ENSG00000133119, ENSG00000196584, ENSG00000111247, ENSG00000012048
0	HSP90 chaperone cycle for steroid hormone receptors (SHR)	55	7	0.854576	8.19119	+	4.39479e-05	TUBA1C, TUBA1A, TUBB6, TUBA1B, TUBB3, TUBB4B, TUBB2A	ENSG00000167553, ENSG00000167552, ENSG00000176014, ENSG00000123416, ENSG00000258947, ENSG00000188229, ENSG00000137267
0	Condensation of Prophase Chromosomes	42	5	0.652586	7.66183	+	0.00073621	SMC2, H2AX, H2AZ1, CCNB1, NCAPG2	ENSG00000136824, ENSG00000188486, ENSG00000164032, ENSG00000134057, ENSG00000146918
1	Mitotic Prophase	104	7	1.61593	4.33188	+	0.00160632	SMC2, H2AX, H2AZ1, CCNB1, NCAPG2, LMNB1, CCNB2	ENSG00000136824, ENSG00000188486, ENSG00000164032, ENSG00000134057, ENSG00000146918, ENSG00000113368, ENSG00000157456
0	SUMOylation of DNA replication proteins	43	5	0.668123	7.48365	+	0.000811648	CDCA8, TOP2A, RANGAP1, BIRC5, INCENP	ENSG00000134690, ENSG00000131747, ENSG00000100401, ENSG00000089685, ENSG00000149503
0	Orc1 removal from chromatin	70	8	1.08764	7.35536	+	2.54584e-05	MCM3, ORC6, MCM2, ORC1, MCM8, MCM5, CDC6, CDT1	ENSG00000112118, ENSG00000091651, ENSG00000073111, ENSG00000085840, ENSG00000125885, ENSG00000100297, ENSG00000094804, ENSG00000167513
1	Switching of origins to a post-replicative state	89	8	1.38286	5.78511	+	0.000122103	MCM3, ORC6, MCM2, ORC1, MCM8, MCM5, CDC6, CDT1	ENSG00000112118, ENSG00000091651, ENSG00000073111, ENSG00000085840, ENSG00000125885, ENSG00000100297, ENSG00000094804, ENSG00000167513
0	Recruitment of NuMA to mitotic centrosomes	92	10	1.42947	6.99558	+	3.75147e-06	TUBA1C, CEP72, TUBA1A, TUBB6, TUBA1B, TUBB3, TUBB4B, HAUS8, TUBB2A, TUBG1	ENSG00000167553, ENSG00000112877, ENSG00000167552, ENSG00000176014, ENSG00000123416, ENSG00000258947, ENSG00000188229, ENSG00000131351, ENSG00000137267, ENSG00000131462
0	Meiotic recombination	56	6	0.870114	6.89565	+	0.000366198	RAD51, H2AX, H2AZ1, PSMC3IP, MND1, BRCA1	ENSG00000051180, ENSG00000188486, ENSG00000164032, ENSG00000131470, ENSG00000121211, ENSG00000012048
1	Meiosis	86	7	1.33625	5.23855	+	0.000565586	RAD51, H2AX, H2AZ1, PSMC3IP, LMNB1, MND1, BRCA1	ENSG00000051180, ENSG00000188486, ENSG00000164032, ENSG00000131470, ENSG00000113368, ENSG00000121211, ENSG00000012048
0	Translocation of SLC2A4 (GLUT4) to the plasma membrane	70	7	1.08764	6.43594	+	0.000176738	TUBA1C, TUBA1A, TUBB6, TUBA1B, TUBB3, TUBB4B, TUBB2A	ENSG00000167553, ENSG00000167552, ENSG00000176014, ENSG00000123416, ENSG00000258947, ENSG00000188229, ENSG00000137267
0	AURKA Activation by TPX2	71	7	1.10318	6.34529	+	0.000191653	CEP72, TUBA1A, TPX2, TUBB4B, HAUS8, HMMR, TUBG1	ENSG00000112877, ENSG00000167552, ENSG00000088325, ENSG00000188229, ENSG00000131351, ENSG00000072571, ENSG00000131462
0	Regulation of PLK1 Activity at G2/M Transition	85	7	1.32071	5.30018	+	0.000529842	CEP72, TUBA1A, CCNB1, TUBB4B, HAUS8, CCNB2, TUBG1	ENSG00000112877, ENSG00000167552, ENSG00000134057, ENSG00000188229, ENSG00000131351, ENSG00000157456, ENSG00000131462
0	Processing of DNA double-strand break ends	81	6	1.25856	4.76736	+	0.00218822	EXO1, RFC3, H2AX, TIMELESS, CLSPN, BRCA1	ENSG00000174371, ENSG00000133119, ENSG00000188486, ENSG00000111602, ENSG00000092853, ENSG00000012048
0	HCMV Early Events	99	7	1.53824	4.55066	+	0.00122951	TUBA1C, TUBA1A, TUBB6, TUBA1B, TUBB3, TUBB4B, TUBB2A	ENSG00000167553, ENSG00000167552, ENSG00000176014, ENSG00000123416, ENSG00000258947, ENSG00000188229, ENSG00000137267
0	COPI-mediated anterograde transport	100	7	1.55378	4.50516	+	0.00129868	TUBA1C, TUBA1A, TUBB6, TUBA1B, TUBB3, TUBB4B, TUBB2A	ENSG00000167553, ENSG00000167552, ENSG00000176014, ENSG00000123416, ENSG00000258947, ENSG00000188229, ENSG00000137267
0	Hedgehog 'off' state	110	7	1.70915	4.0956	+	0.00217082	TUBA1C, TUBA1A, TUBB6, TUBA1B, TUBB3, TUBB4B, TUBB2A	ENSG00000167553, ENSG00000167552, ENSG00000176014, ENSG00000123416, ENSG00000258947, ENSG00000188229, ENSG00000137267
1	Signaling by Hedgehog	146	9	2.26851	3.96736	+	0.000655119	TUBA1C, HHIP, TUBA1A, TUBB6, TUBA1B, TUBB3, TUBB4B, ARRB1, TUBB2A	ENSG00000167553, ENSG00000164161, ENSG00000167552, ENSG00000176014, ENSG00000123416, ENSG00000258947, ENSG00000188229, ENSG00000137486, ENSG00000137267
