# Supplementary material for: Metabolic and Transcriptional Changes across Osteogenic Differentiation of Mesenchymal Stromal Cells
Source: Bioengineering (Basel). 2021 Dec 10;8(12):208. doi: 10.3390/bioengineering8120208 (PMC8698318; doi:10.3390/bioengineering8120208)
Supplement: Supplementary file 1 [file bioengineering-08-00208-s001.zip › supplementary.table S12.xlsx]

## Sheet: up
Regulon ID	TF	Regulon size	Target genes	TF-targets PCC	Enrichment corrected P value	Activity on Day 3	Activity on Day 6	Activity on Day 9	Activity on Day 16	Activity on Day 28
ZNF521.45	ZNF521	45	CFI, KCNT2, LAMA4, RFTN2, ADAMTS5, PCDH18, ANGPTL2, LEPR, PLXDC2, GAS1, EPHX1, DCN, DDR2, PROS1, CADM3, CYGB, SLC40A1, OLFML2A, LCA5, DNAJC6, SESN3, SVEP1, HTRA1, FBLN1, GPC6, SERPING1, ASAP3, IFITM1, RNF144A, SLC9A9, LUM, CFH, HNMT, ECM2, CYBRD1, EBF1, GPNMB, VCAM1, PMP22, MFAP4, RTN4RL2, COL21A1, TMEM150C, SLIT3, SSPN	0.906	0.0351	-1.664	-0.091	0.542	0.059	1.154
FOXC1.34	FOXC1	34	FIBIN, LAMA4, APOD, FMOD, FOXO1, EPAS1, GYPC, DCN, DDR2, PROS1, STOM, FRZB, IL1R1, ACKR1, CDKN1A, SRPX, IGF2, FBLN1, GPC6, KLF11, SERPING1, C1R, ATP8B4, MFGE8, GPX3, SERPINF1, NDNF, SCG2, ARHGAP6, MFAP4, C7, CFD, HMCN1, NBL1	0.9	0.0357	-1.732	-0.214	0.694	0.262	0.99
PRRX2.31	PRRX2	31	PTGER2, CH25H, PTGES, FAM20C, FMOD, ACSL1, NEBL, DCN, STOM, IL1R1, CADM3, PTGFR, CYGB, IGF2, IFITM3, ADH1B, FBLN1, SAMHD1, C1R, KCNK15, SERPINF1, IFITM1, PLAU, LBP, TOX2, BOC, G0S2, CFD, MFAP4, NBL1, RTN4RL2	0.842	0.0428	-1.648	-0.292	0.815	0.325	0.799
TGIF1.19	TGIF1	19	INHBB, MAP3K8, MEDAG, PKIG, PLPP1, CEBPB, BTG1, CEBPD, TLE6, MAP3K5, GABARAPL1, ANKRD28, YPEL2, ABHD4, TLE2, SOD2, RAP1B, ARHGAP6, PMP22	0.905	0.0629	-1.484	-0.071	0.541	-0.374	1.388
ARID5B.19	ARID5B	19	TLR4, GBP2, USP53, CEBPD, STON1, MAP3K5, GABARAPL1, TENM2, YPEL2, BCL6, CFH, ECM2, C1S, LMCD1, EBF1, PLSCR1, PNRC1, PDGFRA, FGF7	0.884	0.0394	-1.661	0.233	0.339	-0.213	1.303
OSR2.18	OSR2	18	THBS2, NUDT4, MEDAG, PPARG, FZD4, FBLN2, DPT, ISM1, TSC22D3, LAMA2, CRLF1, SFRP1, MFAP4, C7, CFD, CORO6, PMP22, NBL1	0.887	0.0181	-1.319	-0.501	0.546	-0.247	1.521
YBX3.17	YBX3	17	MEDAG, NDRG1, RAB31, GJA1, CEBPB, BTG1, SERPINA3, GYPC, STOM, IL1R1, IL1R2, ACKR1, SPRY1, CDKN1A, SLC7A2, C1QTNF1, CRISPLD2	0.927	0.0535	-1.565	-0.471	0.487	0.301	1.248
TSC22D1.16	TSC22D1	16	PDK4, BTG2, ANTXR2, WASL, OSGIN2, NUDT4, BTG1, PKIG, TSC22D3, SSBP2, KLF9, NEDD9, SESN1, ENPP4, EPS8, CDKN1C	0.94	0.0506	-1.237	-0.339	0.002	-0.106	1.68
ZBTB47.15	ZBTB47	15	FMOD, GYPC, DDR2, ANGPTL1, STAT5A, HTRA1, IFITM3, SERPING1, C1R, MFGE8, SERPINF1, ZCCHC24, SLIT3, C1QTNF1, JDP2	0.889	0.0728	-1.754	-0.203	0.68	0.293	0.984
JDP2.13	JDP2	13	TMEM100, CCND2, EPHX1, DCN, DDR2, MMP28, CYGB, FBLN2, DPT, TSC22D3, TSC22D1, GPNMB, VCAM1	0.936	0.045	-1.423	-0.586	0.409	0.274	1.327
SP100.13	SP100	13	CCNG2, STON1, PLEKHH2, CREBRF, ANKRD28, YPEL2, FGF7, RCN1, CREG1, PLSCR1, PNRC1, BST2, TP53INP1	0.928	0.0169	-1.651	0.105	0.14	0.021	1.386
KLF15.12	KLF15	12	ZBTB16, USP53, CEBPD, STON1, GABARAPL1, GALNT15, BCL6, RGCC, CALCOCO2, ADHFE1, INSR, CDKN1C	0.899	0.0266	-1.323	0.218	-0.079	-0.42	1.604
TCF21.10	TCF21	10	FBLN2, DPT, SFRP1, PDE1A, ANTXR1, OSR2, RARRES2, MYLK, A2M, NCAM2	0.905	0.0701	-1.064	-0.48	0.118	-0.358	1.785
RORA.8	RORA	8	USP53, GABARAPL1, PLEKHH2, CREBRF, ANKRD28, BCL6, C1orf21, ANGPT1	0.887	0.0464	-1.469	0.257	0.049	-0.388	1.551
ARID5A.7	ARID5A	7	PKIG, KDM7A, GEM, CEBPB, BTG1, EPS8, PELI1	0.915	0.0777	-1.334	-0.334	0.523	-0.386	1.531
TFDP2.7	TFDP2	7	PLEKHH2, ANKRD28, CREBRF, YPEL2, C1orf21, ADHFE1, INSR	0.928	0.077	-1.284	0.205	-0.026	-0.547	1.653
NFATC4.6	NFATC4	6	ADAMTS10, PODN, C11orf95, MAP3K12, VWA5A, FAM20A	0.902	0.061	-1.375	0.791	1.258	-0.088	-0.585
TBX15.6	TBX15	6	FMOD, FOXO1, SMOC1, DCN, DDR2, ANGPTL1	0.831	0.0136	-1.759	-0.285	0.476	0.447	1.122
DBP.5	DBP	5	PTPRG, GLUL, GBE1, IL1RL1, OSGIN2	0.864	0.0907	-0.875	-0.62	-0.446	0.048	1.893
ATF4.5	ATF4	5	CEBPB, DDIT3, NUPR1, DDR2, DDIT4	0.977	0.0059	-1.582	-0.498	0.62	0.207	1.253
GLIS3.5	GLIS3	5	LAYN, CFH, CBX7, C1S, EFEMP1	0.805	0.0043	-1.721	0.195	0.681	-0.324	1.169
ZNF22.4	ZNF22	4	NUDT4, PCDH18, PPARG, IL18R1	0.819	0.0463	-1.539	-0.327	0.583	-0.153	1.436
ZBED3.4	ZBED3	4	METTL7A, CD302, RASL10B, CIDEC	0.952	0.0214	-1.754	-0.122	0.163	0.44	1.272
POU6F1.3	POU6F1	3	ADAMTS10, C11orf95, MAP3K12	0.829	0.053	-1.272	0.603	1.527	-0.378	-0.481
HIF3A.3	HIF3A	3	ABCA9, EPHB6, ABCA6	0.809	0.0014	-1.453	1.596	0.218	-0.401	0.04
ZBTB38.3	ZBTB38	3	MYLK, MBNL2, ENPP4	0.862	0.0658	-1.118	-0.232	-0.42	-0.09	1.86
TEF.3	TEF	3	CBX7, NR1D2, PPL	0.942	0.0214	-1.665	0.348	0.505	-0.439	1.25
RORB.2	RORB	2	PID1, BTBD3	0.941	0.0701	-1.204	-0.934	-0.068	0.802	1.404
ZFP90.2	ZFP90	2	C11orf95, MAP3K12	0.892	0.0679	-1.437	0.503	1.509	-0.174	-0.401
TBX19.2	TBX19	2	WDR86, TM4SF20	0.968	0.0638	-1.166	0.341	0.9	-1.166	1.089
CREBL2.2	CREBL2	2	PIK3IP1, PCMTD1	0.817	0.0529	-1.763	0.817	-0.07	-0.038	1.055
NKX3-2.2	NKX3-2	2	PCMTD1, PTK2B	0.947	0.0487	-1.878	0.628	-0.015	0.319	0.946
PLAG1.2	PLAG1	2	PIK3IP1, PCMTD1	0.922	0.0366	-1.763	0.817	-0.07	-0.038	1.055
ZNF581.2	ZNF581	2	DHRS3, NATD1	0.866	0.0795	-1.84	0.888	0.497	-0.136	0.591
FOS.2	FOS	2	MMP7, DDIT3	0.947	0.0542	-1.293	-0.834	0.581	0.055	1.491
BHLHE40.2	BHLHE40	2	VGLL4, NR1D1	0.808	0.0383	-1.148	-0.482	0.141	-0.316	1.804
EBF1.2	EBF1	2	EEPD1, ST3GAL5	0.811	0.0555	-1.03	-0.787	0.252	-0.207	1.772
FOXO1.2	FOXO1	2	CNR1, DUSP4	0.885	0.0267	-0.957	-0.957	0.227	-0.066	1.752
PPARG.2	PPARG	2	SAT1, NR1D1	0.913	0.0267	-1.292	-0.412	0.088	-0.144	1.76
HLX.2	HLX	2	RARRES2, FAM110B	0.824	0.085	-1.059	-0.633	0.731	-0.633	1.594
ATOH8.2	ATOH8	2	TIMP4, SRPX	0.866	0.0632	-1.668	-0.288	-0.064	0.943	1.077
TWIST1.2	TWIST1	2	CDKN1A, SRPX	0.908	0.0014	-1.605	-0.423	-0.069	1.109	0.989
ZNF350.2	ZNF350	2	TCP11L2, NFYB	0.813	0.0798	-1.399	0.975	0.786	-0.906	0.545
MEF2A.2	MEF2A	2	MYLK, NEDD9	0.817	0.0344	-1.147	-0.165	-0.466	-0.067	1.844
ARNT.2	ARNT	2	ANGPT1, TENM2	0.809	0.0782	-1.541	0.127	0.032	-0.198	1.58
FOXO3.2	FOXO3	2	CCNG2, BCL6	0.94	0.0464	-1.534	0.39	0.197	-0.512	1.459
CEBPB.2	CEBPB	2	ADM, IGF2	0.94	0.0525	-1.834	0.005	0.712	0.101	1.016
ZNF394.2	ZNF394	2	OVGP1, OLFML2B	0.823	0.071	-1.487	-0.212	1.636	-0.014	0.077
KLF11.2	KLF11	2	NR1D2, OTUD1	0.901	0.0394	-1.54	0.239	0.625	-0.64	1.316
RLF.2	RLF	2	CFAP69, PELI1	0.871	0.0573	-1.091	-0.096	0.27	-0.814	1.731
SNAI2.2	SNAI2	2	C1QTNF1, CRISPLD2	0.901	0.0205	-1.542	-0.34	0.012	0.35	1.521

## Sheet: down
Regulon ID	TF	Regulon size	Target genes	TF-targets PCC	Enrichment corrected P value	Activity on Day 3	Activity on Day 6	Activity on Day 9	Activity on Day 16	Activity on Day 28
E2F8.123	E2F8	123	VRK1, CENPO, MYBL2, ESCO2, CDCA7, CDT1, INCENP, UHRF1, DTL, EZH2, TCF19, E2F1, ORC1, FANCA, SKA1, FEN1, NECTIN1, MTFR2, PASK, CLSPN, CDC25A, DEPDC1B, WDR62, CENPI, XRCC2, WDR76, PLEK2, FAM111B, CENPA, CENPE, RAD54L, FAM83D, GTSE1, NEK2, NCAPG, BUB1B, GINS1, KIF14, CKS2, ZWILCH, TTK, RACGAP1, CEP55, MCM2, GINS2, STIL, CDC6, CDCA2, PAQR4, GINS4, POC1A, CDCA8, FIGNL1, CHAF1B, SPC24, BUB1, TYMS, CENP…	0.889	0.0108	1.704	0.044	-0.641	0.091	-1.198
E2F4.49	E2F4	49	CDCA7, POLA2, FBXO5, ORC1, CENPO, CDT1, MCM3, CDC25A, MYBL2, FEN1, E2F1, CDC25C, SMC2, TOP2A, CALM1, UBE2C, CCNB1, NUSAP1, NEK2, CENPE, RAD54L, CDC6, MCM8, TYMS, RFC3, GINS1, MCM10, CKS2, SUV39H1, TTK, PLK1, MCM5, PRR11, TMPO, CDK1, BIRC5, ANLN, CDC45, PRC1, NDC80, ASF1B, DBF4, BRCA1, MKI67, AURKB, RAD51, FOXM1, HMMR, MAD2L1	0.838	0	1.67	0.055	-0.708	0.186	-1.202
ZNF726.41	ZNF726	41	POLA2, PASK, CHTF18, FANCA, SKA1, ESCO2, KNL1, C21orf58, ARHGAP11B, CCNB2, KIF2C, SPAG5, TRAIP, SGO1, RRM2, POLQ, CENPE, STIL, BUB1, GINS1, DSN1, KIF14, ZWILCH, GINS4, CENPK, EME1, MCM5, PRC1, HELLS, LIG1, CHAF1A, CCNF, PRR11, CDC20, FOXM1, TROAP, PARPBP, RAD51AP1, KIF11, ORC6, NUF2	0.902	0.0032	1.663	0.147	-0.697	0.113	-1.226
E2F1.30	E2F1	30	CDCA7, POLA2, FBXO5, FANCA, CDT1, UHRF1, DTL, MYBL2, CDC25A, CDC6, MCM8, TYMS, MCM10, RACGAP1, KIF23, PLK4, PRIM2, CDC45, PLK1, ASF1B, HELLS, DBF4, MCM5, BRCA1, AURKA, CDK1, BIRC5, RAD51, FOXM1, DNMT1	0.942	0.0215	1.714	0.043	-0.64	0.083	-1.199
ZNF93.18	ZNF93	18	CLSPN, ESCO2, DTL, FBXO5, KNL1, ARHGAP11B, ECT2, KIF15, POLQ, CENPK, CDC45, HELLS, MAD2L1, FANCI, CDK1, ARHGAP11A, FOXM1, PARPBP	0.946	0.0101	1.674	0.112	-0.621	0.076	-1.242
GATAD2A.18	GATAD2A	18	TNFRSF10D, FJX1, SEC14L2, CCDC86, FOSL1, TPM3, MT2A, ANGPTL4, MYBBP1A, NOP56, TUBB4B, IFRD2, KPNA2, PNP, NOP2, NCLN, RRS1, SLC27A4	0.962	0.0001	1.318	-0.248	-0.684	0.877	-1.264
ZGPAT.16	ZGPAT	16	BCL2L12, CENPO, PLCB3, ATAD3B, POLE, MYBBP1A, NOP2, NCLN, SLC2A6, THOP1, PFAS, FUS, SLC19A1, TONSL, WRAP53, QSOX2	0.953	0.0413	1.454	-0.215	-0.279	0.542	-1.502
ZNF714.14	ZNF714	14	KNL1, ARHGAP11B, MCM2, CENPE, STIL, BUB1B, RFC3, GINS4, KIF20B, EME1, HELLS, PRR11, RAD51AP1, KIF11	0.957	0.0261	1.687	0.09	-0.711	0.119	-1.185
GLYR1.14	GLYR1	14	STIL, RAD54L, CDCA2, BUB1B, BUB1, EXO1, RACGAP1, PRC1, HELLS, FANCI, MELK, DNMT1, ANLN, NCAPH	0.927	0.0377	1.732	0.093	-0.786	0.078	-1.117
GTF3A.13	GTF3A	13	NOP56, IFRD2, KPNA2, RPL26, CHAC2, WDR77, NOP2, SLC2A6, TUBG1, RPS10, PFAS, RRS1, FUS	0.96	0	1.253	-0.206	-0.412	0.882	-1.516
ZBED4.13	ZBED4	13	NOP56, KPNA2, CHAC2, WDR77, NCLN, NOP2, THOP1, PFAS, SLC27A4, CAD, SLC25A19, WRAP53, QSOX2	0.842	0.0425	1.324	-0.17	-0.357	0.758	-1.555
WIZ.10	WIZ	10	MYBBP1A, NOP56, IFRD2, NOP2, NCLN, TUBG1, PFAS, THOP1, RRS1, SLC27A4	0.987	0	1.298	-0.308	-0.337	0.863	-1.516
NFE2L3.9	NFE2L3	9	MTFR2, PASK, HAUS8, EZH2, PLK1, HELLS, LIG1, FANCI, ORC6	0.84	0.0438	1.739	-0.01	-0.44	-0.035	-1.255
KLF16.9	KLF16	9	TNFRSF10D, CCDC86, FJX1, FOSL1, NOP56, TUBB4B, PNP, NOP2, NCLN	0.95	0.0198	1.321	-0.257	-0.728	0.896	-1.232
FOXM1.9	FOXM1	9	CDC25C, CENPF, CCNB1, CENPA, CDC6, CDK1, PLK1, AURKB, BIRC5	0.979	0.0178	1.611	0.19	-0.834	0.255	-1.222
ZNF239.9	ZNF239	9	MYBBP1A, NOP56, CHAC2, WDR77, NOP2, PFAS, THOP1, RRS1, SLC27A4	0.975	0	1.291	-0.3	-0.356	0.872	-1.507
ZNF215.9	ZNF215	9	GINS2, STIL, CDC6, TYMS, RFC3, EXO1, ZWILCH, GINS4, TTK	0.809	0	1.705	0.001	-0.936	0.257	-1.027
ZNF296.8	ZNF296	8	SLC25A10, PASK, CHTF18, CDT1, RECQL4, PSD4, MYBL2, EZH2	0.891	0.0016	1.754	-0.126	-0.26	-0.073	-1.294
ZNF710.8	ZNF710	8	INCENP, PSD4, UHRF1, FEN1, NECTIN1, ARRB1, SH3BP1, PAFAH1B3	0.954	0.0325	1.596	0.028	-0.192	0.02	-1.452
ZNF530.8	ZNF530	8	KIF22, FUS, MCM2, CHAF1B, SPDL1, RFC3, DSN1, SUV39H1	0.888	0.0333	1.66	-0.142	-0.757	0.387	-1.148
CXXC1.7	CXXC1	7	PASK, CHTF18, BCL2L12, HAUS8, ATAD3B, RECQL4, POLE	0.891	0.0484	1.722	-0.243	-0.231	0.083	-1.331
MEOX2.7	MEOX2	7	PLD5, B4GALNT1, PCDH19, LRRC17, DOCK10, SGCD, FAM180A	0.897	0.0028	1.921	-0.079	-0.696	-0.584	-0.562
ZNF485.7	ZNF485	7	NOP2, NOP56, PFAS, CAD, SLC25A19, WRAP53, QSOX2	0.98	0.0308	1.29	-0.186	-0.223	0.734	-1.615
TRERF1.7	TRERF1	7	LPCAT4, MMP16, MAP4K2, CNTNAP1, PIF1, SH3BP1, CARD10	0.907	0	1.227	0.367	0.085	0.121	-1.799
MXD3.7	MXD3	7	PLK1, TACC3, EME1, LIG1, TROAP, CDCA3, ORC6	0.939	0.064	1.685	0.109	-0.643	0.132	-1.283
MLX.6	MLX	6	NOP56, CHAC2, WDR77, TUBG1, RRS1, SLC27A4	0.853	0.0243	1.271	-0.253	-0.411	0.899	-1.506
NFATC3.6	NFATC3	6	PPRC1, WRAP53, MTFP1, SMTN, CAD, SLC25A19	0.809	0.0299	1.335	-0.205	-0.025	0.561	-1.666
HIVEP3.5	HIVEP3	5	SHB, WDR4, UHRF1, EPHB2, NECTIN1	0.846	0.0016	1.656	-0.055	-0.121	-0.03	-1.449
PRDM16.5	PRDM16	5	ATP10A, NES, PCDH10, PEAR1, SNCG	0.887	0.0556	1.223	0.7	0.025	-0.364	-1.585
MYBL1.5	MYBL1	5	CENPI, DOCK10, SGCD, PIF1, VEPH1	0.921	0.0912	1.681	0.147	-0.41	-0.188	-1.229
BATF3.5	BATF3	5	ANGPTL4, NOP56, PNP, NOP2, SLC2A6	0.886	0.0584	1.267	-0.148	-0.494	0.877	-1.501
E4F1.5	E4F1	5	MYBBP1A, KIF22, NOP2, NCLN, THOP1	0.903	0.0151	1.328	-0.269	-0.378	0.825	-1.506
ZBTB17.5	ZBTB17	5	IFRD2, NOP2, NCLN, SLC2A6, THOP1	0.873	0.0497	1.33	-0.171	-0.425	0.796	-1.529
ZNF202.5	ZNF202	5	NOP56, NOP2, PFAS, RRS1, FUS	0.922	0.0064	1.297	-0.335	-0.306	0.858	-1.515
ZNF335.5	ZNF335	5	MYBBP1A, NCLN, RPS10, PFAS, FUS	0.971	0.0243	1.237	-0.258	-0.334	0.875	-1.519
ZNF300.5	ZNF300	5	CHAF1B, SPDL1, TYMS, RFC3, ZWILCH	0.827	0.0214	1.685	-0.072	-0.875	0.352	-1.09
ZNF41.4	ZNF41	4	DKK2, PDCD1LG2, ARHGAP18, RBL1	0.874	0.0594	1.636	-0.158	-1.463	0.178	-0.193
YBX1.4	YBX1	4	TOP2A, CCNB1, TYMS, CKS2	0.866	0.0462	1.515	0.03	-0.875	0.568	-1.238
PRDM15.4	PRDM15	4	PFAS, MYBBP1A, NOP2, FUS	0.846	0.0079	1.359	-0.33	-0.277	0.767	-1.52
ZNF324.4	ZNF324	4	MYBBP1A, NOP56, PFAS, FUS	0.847	0.0392	1.328	-0.344	-0.276	0.808	-1.516
ZNF512B.4	ZNF512B	4	MYBBP1A, KIF22, PFAS, FUS	0.975	0.024	1.409	-0.304	-0.353	0.727	-1.479
ZNF629.4	ZNF629	4	MYBBP1A, RRS1, WDR77, PFAS	0.81	0.0243	1.309	-0.398	-0.257	0.849	-1.502
ZNF749.4	ZNF749	4	PFAS, MYBBP1A, NOP56, NOP2	0.954	0.0012	1.273	-0.367	-0.236	0.87	-1.54
ZNF682.4	ZNF682	4	ZWILCH, TYMS, SUV39H1, STIL	0.812	0.0086	1.675	0.064	-0.903	0.271	-1.106
ZNF74.4	ZNF74	4	CAD, SLC25A19, TONSL, MT1X	0.958	0.0189	1.25	-0.181	0.003	0.628	-1.701
ZNF107.4	ZNF107	4	ARHGAP11A, MCM5, HELLS, KIF11	0.842	0.0429	1.679	0.203	-0.751	0.107	-1.238
ATF5.3	ATF5	3	RRS1, NOP56, RPL26	0.945	0.0321	1.128	-0.391	-0.328	1.089	-1.498
ZNF324B.3	ZNF324B	3	MYBBP1A, WDR77, PFAS	0.866	0.0321	1.362	-0.351	-0.275	0.774	-1.51
ZNF668.3	ZNF668	3	NCLN, TUBG1, SLC27A4	0.955	0.074	1.366	-0.194	-0.469	0.794	-1.497
HOXB3.3	HOXB3	3	PEAR1, CPT1C, PLEKHG5	0.945	0.0172	0.88	0.975	0.303	-0.444	-1.713
E2F3.3	E2F3	3	AURKA, PLK1, MCM5	0.851	0.0006	1.613	0.171	-0.824	0.296	-1.256
E2F7.2	E2F7	2	UHRF1, E2F1	0.966	0.0241	1.803	0.011	-0.291	-0.291	-1.231
MYBL2.2	MYBL2	2	TOP2A, CENPF	0.894	0.0465	1.458	0.279	-0.81	0.445	-1.373
PIN1.2	PIN1	2	BUB1, CENPA	0.95	0.0117	1.688	0.178	-1.022	0.178	-1.022
EBF3.2	EBF3	2	PEAR1, SNCG	0.854	0.0352	0.716	1.143	0.254	-0.396	-1.718
FOXL1.2	FOXL1	2	PEAR1, PLEKHG5	0.967	0.0435	0.839	0.982	0.332	-0.431	-1.723
HDX.2	HDX	2	MMP16, CNTNAP1	0.896	0.0642	1.247	0.429	0.1	-0.003	-1.773
NPAS1.2	NPAS1	2	LPCAT4, PAFAH1B3	0.884	0.0494	1.283	0.3	0.088	0.103	-1.774
SOX12.2	SOX12	2	LPCAT4, MAP4K2	0.88	0.0829	1.176	0.372	0.125	0.159	-1.832
TFDP1.2	TFDP1	2	CDK1, CKAP2L	0.988	0.0245	1.596	0.097	-0.6	0.298	-1.391
